# Supplementary material for: Msx1 loss suppresses formation of the ectopic crypts developed in the Apc-deficient small intestinal epithelium
Source: PubMed Central journal article supplement (PMC6367488; doi:10.1038/s41598-018-38310-y), 2019-02-07
Supplement: 41598_2018_38310_MOESM2_ESM.pdf [file 41598_2018_38310_MOESM2_ESM.pdf]

## **Supplementary Tables**

**Article: Msx1 loss suppresses formation of the ectopic crypts developed in the Apc-deficient small intestinal epithelium**

**Authors:** Monika Horazna, Lucie Janeckova, Jiri Svec, Olga Babosova, Dusan Hrckulak, Martina Vojtechova, Katerina Galuskova, Eva Sloncova, Michal Kolar, Hynek Strnad, and Vladimir Korinek

## Supplementary Table S1

Differentially expressed genes ( $\log_{2}FC \geq 1$ ,  $q$ -value  $< 0.05$  and ) in the small intestinal epithelium 2 days upon Apc depletion compared to tissue with intact Apc

| ENTREZ    | SYMBOL        | GENENAME                                                                                                                                    | logFC | q-value  |
|-----------|---------------|---------------------------------------------------------------------------------------------------------------------------------------------|-------|----------|
| 66214     | 1190002H23Rik | RIKEN cDNA 1190002H23 gene                                                                                                                  | 2.09  | 0.0044   |
| 237038    | Nox1          | NADPH oxidase 1                                                                                                                             | 1.76  | 0.0071   |
| 193740    | Hspa1a        | heat shock protein 1A                                                                                                                       | 1.61  | 0.045    |
| 110454    | Ly6a          | lymphocyte antigen 6 complex, locus A                                                                                                       | 1.51  | 0.012    |
| 26897     | ILMN_223756   | Mus musculus acyl-CoA thioesterase 1 (Acot1), mRNA.                                                                                         | 1.49  | 0.0055   |
| 29820     | Tnfrsf19      | tumor necrosis factor receptor superfamily, member 19                                                                                       | 1.45  | 0.00033  |
| 74186     | Ccdc3         | coiled-coil domain containing 3                                                                                                             | 1.43  | 2.00E-04 |
| 11459     | Acta1         | actin, alpha 1, skeletal muscle                                                                                                             | 1.42  | 0.01     |
| 11839     | Areg          | amphiregulin                                                                                                                                | 1.4   | 0.012    |
| 66141     | Ifitm3        | interferon induced transmembrane protein 3                                                                                                  | 1.3   | 0.0038   |
| 406217    | ILMN_231589   | Mus musculus brain expressed gene 4 (Bex4), mRNA.                                                                                           | 1.28  | 7.00E-04 |
| 226419    | Dyrk3         | dual-specificity tyrosine-(Y)-phosphorylation regulated kinase 3                                                                            | 1.2   | 0.014    |
| 406217    | Bex4          | brain expressed gene 4                                                                                                                      | 1.2   | 0.028    |
| 15985     | Cd79b         | CD79B antigen                                                                                                                               | 1.18  | 0.031    |
| 72821     | Scn2b         | sodium channel, voltage-gated, type II, beta                                                                                                | 1.17  | 0.0052   |
| 26897     | Acot1         | acyl-CoA thioesterase 1                                                                                                                     | 1.17  | 0.0044   |
| 73710     | Tubb2b        | tubulin, beta 2B                                                                                                                            | 1.15  | 0.0017   |
| 53605     | ILMN_214137   | Mus musculus nucleosome assembly protein 1-like 1 (Nap111), mRNA.                                                                           | 1.14  | 0.0013   |
| 244886    | A1118078      | expressed sequence A1118078                                                                                                                 | 1.14  | 0.0043   |
| 19703     | Renbp         | renin binding protein                                                                                                                       | 1.12  | 0.021    |
| 231327    | Ppat          | phosphoribosyl pyrophosphate amidotransferase                                                                                               | 1.08  | 0.0019   |
| 14859     | Gsta3         | glutathione S-transferase, alpha 3                                                                                                          | 1.08  | 0.018    |
| 68026     | 2810417H13Rik | RIKEN cDNA 2810417H13 gene                                                                                                                  | 1.06  | 0.018    |
| 71805     | Nup93         | nucleoporin 93                                                                                                                              | 1.05  | 0.0038   |
| 320685    | Detd          | dCMP deaminase                                                                                                                              | 1.02  | 0.036    |
| 100047619 | ILMN_219663   | PREDICTED: Mus musculus similar to solute carrier family 7 (cationic amino acid transporter, y+ system), member 5 (LOC100047619), misc RNA. | 1.01  | 0.011    |
| 26362     | Axl           | AXL receptor tyrosine kinase                                                                                                                | 1     | 0.046    |
| 77125     | Il33          | interleukin 33                                                                                                                              | -1    | 0.031    |
| 212070    | Clrn3         | clarin 3                                                                                                                                    | -1    | 0.0096   |
| 11832     | ILMN_210666   | Mus musculus aquaporin 7 (Aqp7), mRNA.                                                                                                      | -1    | 7.00E-04 |
| 74018     | ILMN_211844   | Mus musculus amyotrophic lateral sclerosis 2 (juvenile) homolog (human) (Als2), mRNA.                                                       | -1    | 0.0088   |
| 71670     | Acy3          | aspartoacylase (aminoacylase) 3                                                                                                             | -1    | 0.0038   |
| 328365    | Zmiz1         | zinc finger, MIZ-type containing 1                                                                                                          | -1.01 | 0.033    |
| 104086    | Cyp27a1       | cytochrome P450, family 27, subfamily a, polypeptide 1                                                                                      | -1.01 | 0.0032   |
| 209387    | Trim30d       | tripartite motif-containing 30D                                                                                                             | -1.01 | 0.017    |
| 104086    | Cyp27a1       | cytochrome P450, family 27, subfamily a, polypeptide 1                                                                                      | -1.03 | 0.007    |
| 12351     | Car4          | carbonic anhydrase 4                                                                                                                        | -1.03 | 0.028    |
| 71733     | Susd2         | sushi domain containing 2                                                                                                                   | -1.04 | 0.045    |
| 15567     | Slc6a4        | solute carrier family 6 (neurotransmitter transporter, serotonin), member 4                                                                 | -1.04 | 0.0052   |
| 68846     | Rnf208        | ring finger protein 208                                                                                                                     | -1.04 | 0.043    |
| 16548     | Khk           | ketoheokinase                                                                                                                               | -1.04 | 0.015    |
| 11803     | Aplp1         | amyloid beta (A4) precursor-like protein 1                                                                                                  | -1.04 | 0.02     |
| 21929     | Tnfaip3       | tumor necrosis factor, alpha-induced protein 3                                                                                              | -1.05 | 0.029    |
| 71648     | ILMN_216896   | Mus musculus optineurin (Optn), mRNA.                                                                                                       | -1.05 | 0.0075   |
| 69123     | ILMN_210310   | Mus musculus RIKEN cDNA 1810022C23 gene (1810022C23Rik), mRNA.                                                                              | -1.06 | 0.0025   |
| 19017     | Ppargc1a      | peroxisome proliferative activated receptor, gamma, coactivator 1 alpha                                                                     | -1.07 | 0.019    |
| 29813     | Zfp385a       | zinc finger protein 385A                                                                                                                    | -1.08 | 0.014    |
| 13026     | Pcyt1a        | phosphate cytidylyltransferase 1, choline, alpha isoform                                                                                    | -1.08 | 0.0074   |
| 54200     | Sult2b1       | sulfotransferase family, cytosolic, 2B, member 1                                                                                            | -1.09 | 0.004    |
| 215113    | Slc43a2       | solute carrier family 43, member 2                                                                                                          | -1.09 | 0.0044   |
| 213019    | Pdlim2        | PDZ and LIM domain 2                                                                                                                        | -1.09 | 0.046    |
| 13120     | Cyp4b1        | cytochrome P450, family 4, subfamily b, polypeptide 1                                                                                       | -1.09 | 0.0062   |
| 17684     | Cited2        | Cbp/p300-interacting transactivator, with Glu/Asp-rich carboxy-terminal domain, 2                                                           | -1.1  | 0.003    |
| 67131     | Acbd4         | acyl-Coenzyme A binding domain containing 4                                                                                                 | -1.1  | 0.014    |
| 20604     | Sst           | somatostatin                                                                                                                                | -1.11 | 0.042    |
| 104601    | Mycbpap       | MYCBP associated protein                                                                                                                    | -1.11 | 0.0038   |
| 100044177 | ILMN_185055   | PREDICTED: Mus musculus hypothetical protein LOC100044177 (LOC100044177), mRNA.                                                             | -1.11 | 0.0058   |
| 433470    | AA467197      | expressed sequence AA467197                                                                                                                 | -1.11 | 0.038    |
| 12182     | ILMN_214474   | Mus musculus bone marrow stromal cell antigen 1 (Bst1), mRNA.                                                                               | -1.12 | 0.0038   |
| 54200     | Sult2b1       | sulfotransferase family, cytosolic, 2B, member 1                                                                                            | -1.13 | 0.0038   |
| 23836     | Slc5a11       | solute carrier family 5 (sodium/glucose cotransporter), member 11                                                                           | -1.13 | 0.012    |
| 213522    | Plekhhg6      | pleckstrin homology domain containing, family G (with RhoGef domain) member 6                                                               | -1.13 | 0.0077   |
| 12962     | Crybb3        | crystallin, beta B3                                                                                                                         | -1.13 | 0.003    |
| 54447     | Asah2         | N-acylsphingosine amidohydrolase 2                                                                                                          | -1.13 | 0.043    |
| 11832     | Aqp7          | aquaporin 7                                                                                                                                 | -1.13 | 0.026    |
| 67484     | Eepd1         | endonuclease/exonuclease/phosphatase family domain containing 1                                                                             | -1.13 | 0.0038   |
| 545902    | Ptprh         | protein tyrosine phosphatase, receptor type, H                                                                                              | -1.15 | 0.006    |
| 213019    | Pdlim2        | PDZ and LIM domain 2                                                                                                                        | -1.15 | 0.017    |
| 56226     | Espn          | espin                                                                                                                                       | -1.15 | 0.0088   |
| 13850     | Ephx2         | epoxide hydrolase 2, cytoplasmic                                                                                                            | -1.15 | 0.039    |
| 258458    | Olfir165      | olfactory receptor 165                                                                                                                      | -1.16 | 0.0044   |
| 432516    | Myo1a         | myosin IA                                                                                                                                   | -1.16 | 0.0017   |
| 20526     | Slc2a2        | solute carrier family 2 (facilitated glucose transporter), member 2                                                                         | -1.17 | 0.0038   |
| 19660     | Rbp2          | retinol binding protein 2, cellular                                                                                                         | -1.17 | 0.046    |
| 14963     | ILMN_208890   | Mus musculus histocompatibility 2, blastocyst (H2-BI), mRNA.                                                                                | -1.17 | 0.026    |
| 93694     | Clec2d        | C-type lectin domain family 2, member d                                                                                                     | -1.17 | 0.0058   |
| 50934     | Slc7a8        | solute carrier family 7 (cationic amino acid transporter, y+ system), member 8                                                              | -1.18 | 0.0038   |
| 13370     | Dio1          | deiodinase, iodothyronine, type I                                                                                                           | -1.18 | 0.0075   |
| 208677    | Creb3l3       | cAMP responsive element binding protein 3-like 3                                                                                            | -1.18 | 0.039    |
| 217166    | Nr1d1         | nuclear receptor subfamily 1, group D, member 1                                                                                             | -1.2  | 0.007    |
| 68396     | Nat8          | N-acetyltransferase 8 (GCNS-related, putative)                                                                                              | -1.2  | 0.028    |
| 20698     | Sphk1         | sphingosine kinase 1                                                                                                                        | -1.22 | 0.0052   |
| 11421     | Ace           | angiotensin I converting enzyme (peptidyl-dipeptidase A) 1                                                                                  | -1.22 | 0.013    |
| 54200     | Sult2b1       | sulfotransferase family, cytosolic, 2B, member 1                                                                                            | -1.23 | 0.00085  |
| 20537     | Slc5a1        | solute carrier family 5 (sodium/glucose cotransporter), member 1                                                                            | -1.23 | 0.0044   |
| 11421     | Ace           | angiotensin I converting enzyme (peptidyl-dipeptidase A) 1                                                                                  | -1.26 | 0.0044   |
| 215113    | Slc43a2       | solute carrier family 43, member 2                                                                                                          | -1.28 | 0.00048  |
| 19694     | Reg3a         | regenerating islet-derived 3 alpha                                                                                                          | -1.29 | 0.049    |
| 67473     | Slc47a1       | solute carrier family 47, member 1                                                                                                          | -1.32 | 0.039    |
| 67405     | Nts           | neurotensin                                                                                                                                 | -1.33 | 0.01     |
| 232409    | Clec2e        | C-type lectin domain family 2, member e                                                                                                     | -1.33 | 0.0044   |
| 20526     | Slc2a2        | solute carrier family 2 (facilitated glucose transporter), member 2                                                                         | -1.34 | 0.0058   |
| 109731    | Maob          | monoamine oxidase B                                                                                                                         | -1.34 | 0.01     |

|        |               |                                                                                                          |       |          |
|--------|---------------|----------------------------------------------------------------------------------------------------------|-------|----------|
| 12013  | Bach1         | BTB and CNC homology 1                                                                                   | -1.34 | 0.031    |
| 228775 | Trib3         | tribbles homolog 3 (Drosophila)                                                                          | -1.37 | 0.0019   |
| 13370  | Dio1          | deiodinase, iodothyronine, type 1                                                                        | -1.37 | 0.0042   |
| 56643  | Slc15a1       | solute carrier family 15 (oligopeptide transporter), member 1                                            | -1.4  | 0.029    |
| 19692  | Reg1          | regenerating islet-derived 1                                                                             | -1.41 | 0.0058   |
| 67082  | 1700011H14Rik | RIKEN cDNA 1700011H14 gene                                                                               | -1.41 | 0.0058   |
| 70261  | 2010110P09Rik | RIKEN cDNA 2010110P09 gene                                                                               | -1.45 | 0.0058   |
| 17380  | ILMN_220122   | Mus musculus membrane metallo endopeptidase (Mme), mRNA.                                                 | -1.5  | 0.012    |
| 18604  | Pdk2          | pyruvate dehydrogenase kinase, isoenzyme 2                                                               | -1.51 | 0.00019  |
| 230163 | Aldob         | aldolase B, fructose-bisphosphate                                                                        | -1.52 | 0.022    |
| 64452  | Slc5a4a       | solute carrier family 5, member 4a                                                                       | -1.54 | 0.0016   |
| 17380  | Mme           | membrane metallo endopeptidase                                                                           | -1.62 | 0.0055   |
| 68947  | Chst8         | carbohydrate (N-acetylgalactosamine 4-0) sulfotransferase 8                                              | -1.66 | 0.0033   |
| 54150  | Rdh7          | retinol dehydrogenase 7                                                                                  | -1.68 | 2.00E-04 |
| 71584  | Gdpd2         | glycerophosphodiester phosphodiesterase domain containing 2                                              | -1.71 | 2.10E-06 |
| 13419  | Dnase1        | deoxyribonuclease 1                                                                                      | -1.75 | 0.028    |
| 20526  | Slc2a2        | solute carrier family 2 (facilitated glucose transporter), member 2                                      | -1.83 | 0.013    |
| 64454  | Slc5a4b       | solute carrier family 5 (neutral amino acid transporters, system A), member 4b                           | -1.89 | 3.50E-05 |
| 54150  | Rdh7          | retinol dehydrogenase 7                                                                                  | -1.94 | 2.00E-04 |
| 545156 | Kalrn         | kalirin, RhoGEF kinase                                                                                   | -1.94 | 0.00084  |
| 434203 | ILMN_244381   | Mus musculus solute carrier family 28 (sodium-coupled nucleoside transporter), member 1 (Slc28a1), mRNA. | -2.14 | 0.00046  |

## Supplementary Table S1

Differentially expressed genes ( $|\log_{2}FC| \geq 1$ ,  $q$ -value  $< 0.05$ ) in the small intestinal epithelium 4 days upon Apc depletion compared to tissue with intact Apc

| ENTREZ    | SYMBOL        | GENENAME                                                                                                                                    | log <sub>2</sub> FC | q-value  |
|-----------|---------------|---------------------------------------------------------------------------------------------------------------------------------------------|---------------------|----------|
| 213948    | Aig9b         | ATG9 autophagy related 9 homolog B (S. cerevisiae)                                                                                          | 4.12                | 9.00E-08 |
| 74186     | Ccdc3         | coiled-coil domain containing 3                                                                                                             | 3.91                | 3.80E-11 |
| 66214     | 1190002H23Rik | RIKEN cDNA 1190002H23 gene                                                                                                                  | 3.69                | 4.90E-07 |
| 17701     | Mxsl1         | homeobox, msh-like 1                                                                                                                        | 3.53                | 4.10E-11 |
| 110454    | Ly6a          | lymphocyte antigen 6 complex, locus A                                                                                                       | 3.52                | 1.90E-07 |
| 16010     | Igf1bp4       | insulin-like growth factor binding protein 4                                                                                                | 3.48                | 4.80E-09 |
| 406217    | ILMN_231589   | Mus musculus brain expressed gene 4 (Bex4), mRNA.                                                                                           | 3.4                 | 4.30E-10 |
| 66141     | Ifitm3        | interferon induced transmembrane protein 3                                                                                                  | 3.1                 | 1.40E-08 |
| 18612     | Etv4          | ets variant gene 4 (E1A enhancer binding protein, E1AF)                                                                                     | 3.1                 | 8.90E-07 |
| 16010     | Igf1bp4       | insulin-like growth factor binding protein 4                                                                                                | 3.09                | 4.40E-07 |
| 237038    | Nox1          | NADPH oxidase 1                                                                                                                             | 3.06                | 1.80E-06 |
| 26897     | ILMN_223756   | Mus musculus acyl-CoA thioesterase 1 (Acot1), mRNA.                                                                                         | 3.06                | 1.50E-07 |
| 29820     | Tnfrsf19      | tumor necrosis factor receptor superfamily, member 19                                                                                       | 2.95                | 2.10E-09 |
| 406217    | Bex4          | brain expressed gene 4                                                                                                                      | 2.81                | 1.20E-06 |
| 73710     | Tubb2b        | tubulin, beta 2B                                                                                                                            | 2.66                | 6.30E-09 |
| 18383     | Tnfrsf11b     | tumor necrosis factor receptor superfamily, member 11b (osteoprotegerin)                                                                    | 2.63                | 6.90E-08 |
| 26897     | Acot1         | acyl-CoA thioesterase 1                                                                                                                     | 2.61                | 4.30E-08 |
| 94179     | Krt23         | keratin 23                                                                                                                                  | 2.53                | 3.50E-07 |
| 14859     | Gsta3         | glutathione S-transferase, alpha 3                                                                                                          | 2.51                | 4.90E-07 |
| 103551    | E130012A19Rik | RIKEN cDNA E130012A19 gene                                                                                                                  | 2.5                 | 1.00E-06 |
| 12505     | Cd44          | CD44 antigen                                                                                                                                | 2.49                | 4.10E-08 |
| 27279     | Tnfrsf12a     | tumor necrosis factor receptor superfamily, member 12a                                                                                      | 2.47                | 2.50E-05 |
| 16918     | Myc11         | v-myc myelocytomatosis viral oncogene homolog 1, lung carcinoma derived (avian)                                                             | 2.39                | 3.10E-07 |
| 13401     | Dmwd          | dystrophia myotonica-containing WD repeat motif                                                                                             | 2.37                | 5.00E-09 |
| 55963     | Slc1a4        | solute carrier family 1 (glutamate/neutral amino acid transporter), member 4                                                                | 2.33                | 3.90E-07 |
| 100102    | Pcsk9         | proprotein convertase subtilisin/kexin type 9                                                                                               | 2.33                | 2.80E-07 |
| 56016     | Hebp2         | heme binding protein 2                                                                                                                      | 2.33                | 1.10E-07 |
| 18432     | Mybbp1a       | MYB binding protein (P160) 1a                                                                                                               | 2.31                | 2.60E-07 |
| 320027    | Fstl4         | folliculin-like 4                                                                                                                           | 2.31                | 9.60E-08 |
| 11459     | Acta1         | actin, alpha 1, skeletal muscle                                                                                                             | 2.31                | 7.30E-06 |
| 19703     | Renbp         | renin binding protein                                                                                                                       | 2.3                 | 2.70E-06 |
| 17357     | Marcks11      | MARCKS-like 1                                                                                                                               | 2.26                | 4.20E-07 |
| 100047619 | ILMN_219663   | PREDICTED: Mus musculus similar to solute carrier family 7 (cationic amino acid transporter, y+ system), member 5 (LOC100047619), misc RNA. | 2.23                | 2.90E-07 |
| 107581    | Col16a1       | collagen, type XVI, alpha 1                                                                                                                 | 2.23                | 8.40E-06 |
| 226419    | Dyrk3         | dual-specificity tyrosine-(Y)-phosphorylation regulated kinase 3                                                                            | 2.22                | 3.20E-06 |
| 19385     | Ranbp1        | RAN binding protein 1                                                                                                                       | 2.17                | 3.70E-09 |
| 19277     | Ptpro         | protein tyrosine phosphatase, receptor type, O                                                                                              | 2.16                | 1.40E-06 |
| 15360     | Hmgcs2        | 3-hydroxy-3-methylglutaryl-Coenzyme A synthase 2                                                                                            | 2.16                | 0.0056   |
| 12709     | ILMN_193661   | Mus musculus creatine kinase, brain (Ckb), mRNA.                                                                                            | 2.16                | 4.10E-06 |
| 20810     | Srm           | spermidine synthase                                                                                                                         | 2.15                | 1.10E-06 |
| 72821     | Scn2b         | sodium channel, voltage-gated, type II, beta                                                                                                | 2.15                | 4.40E-07 |
| 11839     | Areg          | amphiregulin                                                                                                                                | 2.15                | 1.80E-05 |
| 215690    | Nav1          | neuron navigator 1                                                                                                                          | 2.14                | 4.20E-07 |
| 13401     | Dmwd          | dystrophia myotonica-containing WD repeat motif                                                                                             | 2.14                | 6.90E-09 |
| 21677     | Tead2         | TEA domain family member 2                                                                                                                  | 2.09                | 1.70E-07 |
| 53605     | ILMN_214137   | Mus musculus nucleosome assembly protein 1-like 1 (Nap11), mRNA.                                                                            | 2.09                | 4.00E-08 |
| 14862     | Gstm1         | glutathione S-transferase, mu 1                                                                                                             | 2.09                | 3.90E-09 |
| 15469     | Prmt1         | protein arginine N-methyltransferase 1                                                                                                      | 2.08                | 3.40E-08 |
| 231327    | Ppat          | phosphoribosyl pyrophosphate amidotransferase                                                                                               | 2.06                | 5.00E-08 |
| 244886    | A1118078      | expressed sequence A1118078                                                                                                                 | 2.06                | 3.10E-07 |
| 15220     | Foxq1         | forkhead box Q1                                                                                                                             | 2.05                | 1.80E-05 |
| 11925     | Neurog3       | neurogenin 3                                                                                                                                | 2.04                | 2.40E-06 |
| 14570     | Arhgdig       | Rho GDP dissociation inhibitor (GDI) gamma                                                                                                  | 2.03                | 6.90E-07 |
| 72462     | Rpl1b         | ribosomal RNA processing 1 homolog B (S. cerevisiae)                                                                                        | 2.01                | 2.00E-07 |
| 353156    | Egfl7         | EGF-like domain 7                                                                                                                           | 2                   | 9.80E-08 |
| 100046120 | ILMN_220805   | PREDICTED: Mus musculus similar to clusterin (LOC100046120), mRNA.                                                                          | 1.99                | 0.00013  |
| 215690    | Nav1          | neuron navigator 1                                                                                                                          | 1.98                | 1.20E-06 |
| 12505     | Cd44          | CD44 antigen                                                                                                                                | 1.97                | 4.90E-07 |
| 100044103 | ILMN_210607   | PREDICTED: Mus musculus similar to mKIAA1645 protein (LOC100044103), mRNA.                                                                  | 1.96                | 1.00E-06 |
| 19752     | Rnase1        | ribonuclease, RNase A family, 1 (pancreatic)                                                                                                | 1.95                | 6.20E-05 |
| 66350     | Pla2g12a      | phospholipase A2, group XIIA                                                                                                                | 1.95                | 2.60E-07 |
| 102657    | Cd276         | CD276 antigen                                                                                                                               | 1.95                | 3.20E-07 |
| 223227    | ILMN_220261   | Mus musculus SRY-box containing gene 21 (Sox21), mRNA.                                                                                      | 1.94                | 3.20E-09 |
| 19280     | Tp53          | protein tyrosine phosphatase, receptor type, S                                                                                              | 1.94                | 1.90E-08 |
| 320685    | Dctd          | dCMP deaminase                                                                                                                              | 1.94                | 2.20E-05 |
| 69524     | Esam          | endothelial cell-specific adhesion molecule                                                                                                 | 1.93                | 1.30E-07 |
| 20652     | Soat1         | sterol O-acyltransferase 1                                                                                                                  | 1.92                | 1.30E-05 |
| 109857    | Cbr3          | carbonyl reductase 3                                                                                                                        | 1.9                 | 0.00038  |
| 68147     | Gar1          | GAR1 ribonucleoprotein homolog (yeast)                                                                                                      | 1.89                | 1.80E-07 |
| 15114     | Hap1          | huntingtin-associated protein 1                                                                                                             | 1.88                | 8.80E-07 |
| 107221    | Gpr120        | G protein-coupled receptor 120                                                                                                              | 1.88                | 9.70E-08 |
| 70082     | Lysmd2        | LysM, putative peptidoglycan-binding, domain containing 2                                                                                   | 1.87                | 8.10E-06 |
| 53356     | Eif3g         | eukaryotic translation initiation factor 3, subunit G                                                                                       | 1.86                | 7.00E-06 |
| 98170     | Tmem132a      | transmembrane protein 132A                                                                                                                  | 1.85                | 3.40E-08 |
| 50492     | Thop1         | thimet oligopeptidase 1                                                                                                                     | 1.84                | 4.90E-07 |
| 20810     | Srm           | spermidine synthase                                                                                                                         | 1.84                | 1.40E-06 |
| 26564     | Ror2          | receptor tyrosine kinase-like orphan receptor 2                                                                                             | 1.84                | 3.20E-06 |
| 77583     | Notum         | notum pectinacetyltransferase homolog (Drosophila)                                                                                          | 1.84                | 1.30E-08 |
| 110006    | ILMN_221841   | Mus musculus glucuronidase, beta (Gusb), mRNA.                                                                                              | 1.84                | 2.90E-07 |
| 27280     | Phlda3        | pleckstrin homology-like domain, family A, member 3                                                                                         | 1.83                | 7.00E-04 |
| 107272    | Psat1         | phosphoserine aminotransferase 1                                                                                                            | 1.82                | 8.70E-06 |
| 57257     | Vav3          | vav 3 oncogene                                                                                                                              | 1.81                | 1.40E-08 |
| 21664     | Phlda1        | pleckstrin homology-like domain, family A, member 1                                                                                         | 1.81                | 0.00048  |
| 434632    | BC085271      | cDNA sequence BC085271                                                                                                                      | 1.81                | 5.00E-06 |
| 53356     | Eif3g         | eukaryotic translation initiation factor 3, subunit G                                                                                       | 1.8                 | 7.30E-07 |
| 12162     | Bmp7          | bone morphogenetic protein 7                                                                                                                | 1.8                 | 1.80E-06 |
| 268396    | Sh3pxd2b      | SH3 and PX domains 2B                                                                                                                       | 1.79                | 3.10E-07 |
| 240334    | Pcyox11       | prenylcysteine oxidase 1 like                                                                                                               | 1.79                | 2.50E-06 |
| 22021     | Tpst1         | protein-tyrosine sulfotransferase 1                                                                                                         | 1.78                | 2.70E-07 |
| 18710     | Pik3r3        | phosphatidylinositol 3 kinase, regulatory subunit, polypeptide 3 (p55)                                                                      | 1.78                | 2.00E-07 |
| 19130     | Prox1         | prospero-related homeobox 1                                                                                                                 | 1.77                | 2.00E-08 |
| 72500     | ILMN_225633   | Mus musculus immediate early response 5-like (Ier5l), mRNA.                                                                                 | 1.77                | 1.90E-08 |
| 76267     | Fads1         | fatty acid desaturase 1                                                                                                                     | 1.77                | 2.70E-07 |
| 93721     | Cpn1          | carboxypeptidase N, polypeptide 1                                                                                                           | 1.77                | 1.20E-05 |
| 66953     | Cdca7         | cell division cycle associated 7                                                                                                            | 1.77                | 1.20E-06 |
| 11898     | Ass1          | argininosuccinate synthetase 1                                                                                                              | 1.77                | 1.20E-05 |
| 116972    | Fam57a        | family with sequence similarity 57, member A                                                                                                | 1.77                | 1.50E-07 |
| 102614    | Rpp25         | ribonuclease P 25 subunit (human)                                                                                                           | 1.76                | 2.70E-07 |
| 319520    | Dusp4         | dual specificity phosphatase 4                                                                                                              | 1.76                | 4.30E-07 |
| 270152    | Amica1        | adhesion molecule, interacts with CXADR antigen 1                                                                                           | 1.76                | 4.40E-06 |
| 20682     | Sox9          | SRY-box containing gene 9                                                                                                                   | 1.75                | 1.60E-05 |
| 109820    | Pgc           | progastrin (pepsinogen C)                                                                                                                   | 1.75                | 2.70E-06 |
| 68915     | Vars2         | valyl-tRNA synthetase 2, mitochondrial (putative)                                                                                           | 1.74                | 7.80E-08 |
| 20810     | Srm           | spermidine synthase                                                                                                                         | 1.74                | 2.90E-05 |
| 100047856 | ILMN_208813   | PREDICTED: Mus musculus similar to calponin 3, acidic (LOC100047856), mRNA.                                                                 | 1.74                | 2.00E-06 |
| 116972    | Fam57a        | family with sequence similarity 57, member A                                                                                                | 1.74                | 7.50E-09 |
| 52530     | Nhp2          | NHP2 ribonucleoprotein homolog (yeast)                                                                                                      | 1.73                | 9.50E-07 |
| 72640     | Mex3a         | mex3 homolog A (C. elegans)                                                                                                                 | 1.73                | 4.30E-08 |
| 19183     | Psmc3ip       | proteasome (prosome, macropain) 26S subunit, ATPase 3, interacting protein                                                                  | 1.72                | 1.50E-05 |
| 328949    | ILMN_247906   | Mus musculus mutated in colorectal cancers (Mcc), mRNA.                                                                                     | 1.71                | 1.20E-06 |
| 242785    | Klh21         | kelch-like 21 (Drosophila)                                                                                                                  | 1.71                | 1.20E-05 |
| 12505     | Cd44          | CD44 antigen                                                                                                                                | 1.71                | 7.80E-06 |

|           |               |                                                                                                 |      |          |
|-----------|---------------|-------------------------------------------------------------------------------------------------|------|----------|
| 229474    | Fhd1          | FH2 domain containing 1                                                                         | 1.71 | 2.50E-06 |
| 93840     | Vangl2        | vang-like 2 (van gogh, Drosophila)                                                              | 1.7  | 2.00E-06 |
| 56505     | Ruvb1         | RuvB-like protein 1                                                                             | 1.7  | 4.30E-08 |
| 19280     | Mtprs         | protein tyrosine phosphatase, receptor type, S                                                  | 1.7  | 4.90E-10 |
| 69902     | Mrt4          | MRT4, mRNA turnover 4, homolog (S. cerevisiae)                                                  | 1.69 | 3.60E-07 |
| 17083     | Tmed1         | transmembrane emp24 domain containing 1                                                         | 1.69 | 3.80E-07 |
| 15361     | Hmg1          | high mobility group A1T-hook 1                                                                  | 1.69 | 2.80E-05 |
| 30877     | Gal3          | guanine nucleotide binding protein-like 3 (nucleolar)                                           | 1.69 | 6.90E-06 |
| 22154     | Tubb5         | tubulin, beta 5                                                                                 | 1.68 | 2.70E-07 |
| 108037    | Shmt2         | serine hydroxymethyltransferase 2 (mitochondrial)                                               | 1.68 | 2.30E-07 |
| 71805     | Nup93         | nucleoporin 93                                                                                  | 1.68 | 8.50E-07 |
| 71242     | Spat24        | spermatogenesis associated 24                                                                   | 1.68 | 3.20E-06 |
| 209354    | Eif2b1        | eukaryotic translation initiation factor 2B, subunit 1 (alpha)                                  | 1.67 | 2.10E-08 |
| 110749    | ILMN_215876   | Mus musculus chromatin assembly factor 1, subunit B (p60) (Chaf1b), mRNA.                       | 1.67 | 2.80E-07 |
| 94275     | ILMN_215570   | Mus musculus melanoma antigen, family D, 1 (Maged1), mRNA.                                      | 1.66 | 4.60E-07 |
| 51797     | Ctps          | cytidine 5'-triphosphate synthase                                                               | 1.66 | 2.50E-06 |
| 27373     | Csnk1e        | casein kinase 1, epsilon                                                                        | 1.65 | 1.50E-08 |
| 100046741 | ILMN_190874   | PREDICTED: Mus musculus similar to red-1 (LOC100046741), mRNA.                                  | 1.64 | 1.60E-07 |
| 110006    | Gusb          | glucuronidase, beta                                                                             | 1.64 | 2.30E-06 |
| 13731     | Emp2          | epithelial membrane protein 2                                                                   | 1.64 | 4.40E-06 |
| 63959     | Slc29a1       | solute carrier family 29 (nucleoside transporters), member 1                                    | 1.63 | 1.20E-05 |
| 19227     | Pthlh         | parathyroid hormone-like peptide                                                                | 1.63 | 3.20E-08 |
| 18391     | Sigmar1       | sigma non-opioid intracellular receptor 1                                                       | 1.63 | 2.60E-07 |
| 272359    | Irf2bp1       | interferon regulatory factor 2 binding protein 1                                                | 1.63 | 3.10E-07 |
| 67951     | Tubb6         | tubulin, beta 6                                                                                 | 1.62 | 8.70E-06 |
| 20019     | Polr1a        | polymerase (RNA) I polypeptide A                                                                | 1.62 | 9.00E-08 |
| 22113     | Phlda2        | pleckstrin homology-like domain, family A, member 2                                             | 1.62 | 0.00012  |
| 57028     | Pdxp          | pyridoxal (pyridoxine, vitamin B6) phosphatase                                                  | 1.62 | 1.10E-07 |
| 55927     | Hes6          | hairly and enhancer of split 6 (Drosophila)                                                     | 1.62 | 1.00E-07 |
| 11792     | Apex1         | apurinic/apurimidinic endonuclease 1                                                            | 1.62 | 8.60E-05 |
| 67824     | Nmr1          | NmrA-like family domain containing 1                                                            | 1.61 | 1.80E-07 |
| 16668     | Krt18         | keratin 18                                                                                      | 1.61 | 1.80E-06 |
| 66902     | Mtap          | methylthioadenosine phosphorylase                                                               | 1.6  | 4.50E-07 |
| 55927     | Hes6          | hairly and enhancer of split 6 (Drosophila)                                                     | 1.6  | 5.70E-07 |
| 116701    | ILMN_211983   | Mus musculus fibroblast growth factor receptor-like 1 (Fgfr1), mRNA.                            | 1.6  | 7.30E-07 |
| 227358    | Fam132b       | family with sequence similarity 132, member B                                                   | 1.6  | 8.90E-07 |
| 14160     | Lgr5          | leucine rich repeat containing G protein coupled receptor 5                                     | 1.59 | 1.90E-06 |
| 72017     | Cyb5r1        | cytochrome b5 reductase 1                                                                       | 1.59 | 0.00015  |
| 17173     | Ascl2         | achaete-scute complex homolog 2 (Drosophila)                                                    | 1.59 | 0.00012  |
| 27966     | Rrp9          | RRP9, small subunit (SSU) processome component, homolog (yeast)                                 | 1.58 | 4.40E-06 |
| 74747     | Ddit4         | DNA-damage-inducible transcript 4                                                               | 1.58 | 1.50E-05 |
| 12124     | Bik           | BCL2-interacting killer                                                                         | 1.58 | 2.20E-06 |
| 66976     | ILMN_212730   | Mus musculus RIKEN cDNA 2410002F23 gene (2410002F23Rik), mRNA.                                  | 1.58 | 3.90E-06 |
| 30927     | Snai3         | snail homolog 3 (Drosophila)                                                                    | 1.57 | 4.00E-08 |
| 20509     | Slc19a1       | solute carrier family 19 (sodium/hydrogen exchanger), member 1                                  | 1.57 | 6.30E-07 |
| 108014    | Srsf9         | serine/arginine-rich splicing factor 9                                                          | 1.57 | 3.20E-07 |
| 17357     | Marcks1       | MARCKS-like 1                                                                                   | 1.57 | 1.30E-06 |
| 51797     | Ctps          | cytidine 5'-triphosphate synthase                                                               | 1.57 | 2.50E-07 |
| 76459     | Car12         | carbonic anhydrase 12                                                                           | 1.57 | 1.00E-05 |
| 12006     | Axin2         | axin2                                                                                           | 1.57 | 6.60E-05 |
| 73710     | 2410129E14Rik | Mus musculus tubulin, beta 2b (Tubb2b), mRNA.                                                   | 1.56 | 3.00E-05 |
| 20361     | Sema7a        | sema domain, immunoglobulin domain (Ig), and GPI membrane anchor, (semaphorin) 7A               | 1.56 | 4.80E-05 |
| 216456    | Gls2          | glutaminase 2 (liver, mitochondrial)                                                            | 1.56 | 4.20E-06 |
| 13639     | Efn4          | ephrin A4                                                                                       | 1.56 | 1.60E-05 |
| 104001    | Rtn1          | reticulon 1                                                                                     | 1.55 | 0.00075  |
| 100608    | ILMN_209940   | Mus musculus nucleolar complex associated 4 homolog (S. cerevisiae) (Noc4), mRNA.               | 1.55 | 4.10E-06 |
| 16206     | Lrig1         | leucine-rich repeats and immunoglobulin-like domains 1                                          | 1.55 | 3.90E-08 |
| 71242     | Spat24        | spermatogenesis associated 24                                                                   | 1.55 | 2.70E-07 |
| 13384     | Mpp3          | membrane protein, palmitoylated 3 (MAGUK p55 subfamily member 3)                                | 1.54 | 5.00E-06 |
| 100019    | Mdn1          | midasin homolog (yeast)                                                                         | 1.54 | 1.10E-05 |
| 72393     | Faim2         | Fas apoptotic inhibitory molecule 2                                                             | 1.54 | 3.60E-06 |
| 64406     | Sp5           | trans-acting transcription factor 5                                                             | 1.53 | 1.20E-06 |
| 81840     | Sorcs2        | sortilin-related VPS10 domain containing receptor 2                                             | 1.53 | 1.40E-06 |
| 66870     | Serp1         | serpin1 mRNA binding protein 1                                                                  | 1.53 | 8.80E-07 |
| 17393     | Mmp7          | matrix metalloproteinase 7                                                                      | 1.53 | 7.00E-06 |
| 66617     | Mettl11a      | methyltransferase like 11A                                                                      | 1.53 | 1.10E-05 |
| 216456    | Gls2          | glutaminase 2 (liver, mitochondrial)                                                            | 1.53 | 4.20E-07 |
| 13436     | Dnmt3b        | DNA methyltransferase 3B                                                                        | 1.53 | 1.30E-07 |
| 11792     | Apex1         | apurinic/apurimidinic endonuclease 1                                                            | 1.52 | 2.20E-06 |
| 21813     | Tgfb2         | transforming growth factor, beta receptor II                                                    | 1.52 | 6.50E-06 |
| 17216     | Mcm2          | minichromosome maintenance deficient 2 mitotin (S. cerevisiae)                                  | 1.52 | 1.20E-07 |
| 22321     | Vars          | valyl-tRNA synthetase                                                                           | 1.51 | 9.70E-08 |
| 21844     | Tiam1         | T-cell lymphoma invasion and metastasis 1                                                       | 1.51 | 6.00E-07 |
| 70556     | Slc25a33      | solute carrier family 25, member 33                                                             | 1.51 | 4.10E-07 |
| 59028     | Rcl1          | RNA terminal phosphate cyclase-like 1                                                           | 1.51 | 1.20E-05 |
| 29871     | Scmh1         | sex comb on midleg homolog 1                                                                    | 1.5  | 1.30E-06 |
| 67223     | Rp15          | ribosomal RNA processing 15 homolog (S. cerevisiae)                                             | 1.5  | 4.90E-06 |
| 16907     | Lmb2          | lamin B2                                                                                        | 1.5  | 6.40E-05 |
| 57773     | Wdr4          | WD repeat domain 4                                                                              | 1.49 | 1.80E-06 |
| 18140     | Uhrf1         | ubiquitin-like, containing PHD and RING finger domains, 1                                       | 1.49 | 9.20E-07 |
| 21815     | Tgfr1         | TGFB-induced factor homeobox 1                                                                  | 1.49 | 8.70E-06 |
| 53605     | ILMN_214137   | Mus musculus nucleosome assembly protein 1-like 1 (Nap111), mRNA.                               | 1.49 | 2.10E-06 |
| 17218     | Mcm5          | minichromosome maintenance deficient 5, cell division cycle 46 (S. cerevisiae)                  | 1.49 | 2.10E-07 |
| 15312     | Hmgn1         | high mobility group nucleosomal binding domain 1                                                | 1.49 | 5.70E-07 |
| 14450     | Gart          | phosphoribosylglycinamide formyltransferase                                                     | 1.49 | 8.80E-06 |
| 13433     | Dnmt1         | DNA methyltransferase (cytosine-5) 1                                                            | 1.49 | 6.00E-06 |
| 98170     | Tmem132a      | transmembrane protein 132A                                                                      | 1.48 | 1.90E-05 |
| 20133     | ILMN_231868   | Mus musculus ribonucleotide reductase M1 (Rrm1), mRNA.                                          | 1.48 | 7.00E-06 |
| 18784     | Pla2g5        | phospholipase A2, group V                                                                       | 1.48 | 0.00091  |
| 17319     | Mif           | macrophage migration inhibitory factor                                                          | 1.48 | 3.10E-08 |
| 14187     | ILMN_218920   | Mus musculus aldo-keto reductase family 1, member B8 (Akr1b8), mRNA.                            | 1.48 | 0.002    |
| 11564     | Adsl          | adenylosuccinate lyase                                                                          | 1.48 | 2.00E-06 |
| 215193    | Diexf         | digestive organ expansion factor homolog (zebrafish)                                            | 1.48 | 8.90E-07 |
| 328162    | Trtm61a       | tRNA methyltransferase 61 homolog A (S. cerevisiae)                                             | 1.48 | 2.50E-05 |
| 71242     | Spat24        | spermatogenesis associated 24                                                                   | 1.48 | 2.30E-07 |
| 103733    | ILMN_184611   | Mus musculus tubulin, gamma 1 (Tubg1), mRNA.                                                    | 1.47 | 6.90E-05 |
| 654467    | ILMN_234090   | Mus musculus heterogeneous nuclear ribonucleoprotein A1 pseudogene (LOC654467) on chromosome 9. | 1.47 | 3.40E-05 |
| 66637     | Tsen15        | tRNA splicing endonuclease 15 homolog (S. cerevisiae)                                           | 1.47 | 3.20E-07 |
| 57785     | Rangrf        | RAN guanine nucleotide release factor                                                           | 1.46 | 4.70E-06 |
| 67177     | Cdt1          | chromatin licensing and DNA replication factor 1                                                | 1.46 | 2.80E-06 |
| 12469     | Cct8          | chaperonin containing Tcp1, subunit 8 (theta)                                                   | 1.46 | 3.20E-06 |
| 27407     | Abcf2         | ATP-binding cassette, sub-family F (GCN20), member 2                                            | 1.46 | 3.10E-07 |
| 71981     | Tdrd12        | tudor domain containing 12                                                                      | 1.45 | 1.70E-05 |
| 17304     | Mife8         | milk fat globule-EGF factor 8 protein                                                           | 1.45 | 5.80E-05 |
| 101612    | Grwd1         | glutamate-rich WD repeat containing 1                                                           | 1.45 | 2.00E-06 |
| 110956    | D17H6S56E-5   | DNA segment, Chr 17, human D6S56E.5                                                             | 1.45 | 1.60E-05 |
| 66523     | 2810004N23Rik | RIKEN cDNA 2810004N23 gene                                                                      | 1.45 | 4.40E-07 |
| 17912     | Myo1b         | myosin IB                                                                                       | 1.44 | 5.40E-05 |
| 17215     | ILMN_213080   | Mus musculus minichromosome maintenance deficient 3 (S. cerevisiae) (Mcm3), mRNA.               | 1.44 | 6.90E-08 |
| 55927     | Hes6          | hairly and enhancer of split 6 (Drosophila)                                                     | 1.44 | 2.70E-06 |
| 80914     | Uck2          | uridine-cytidine kinase 2                                                                       | 1.43 | 2.80E-06 |
| 236539    | ILMN_226456   | Mus musculus 3-phosphoglycerate dehydrogenase (Phgdh), mRNA.                                    | 1.43 | 1.00E-04 |
| 75273     | Pelp1         | proline, glutamic acid and leucine rich protein 1                                               | 1.43 | 1.60E-05 |
| 110310    | Krt7          | keratin 7                                                                                       | 1.43 | 8.30E-06 |
| 217995    | ILMN_214317   | Mus musculus HEAT repeat containing 1 (Heatr1), mRNA.                                           | 1.43 | 1.00E-06 |
| 170942    | ILMN_221931   | Mus musculus erythroid differentiation regulator 1 (Erdrl), mRNA.                               | 1.43 | 0.0033   |
| 12505     | Cd44          | CD44 antigen                                                                                    | 1.43 | 9.40E-05 |

|           |               |                                                                                                             |      |          |
|-----------|---------------|-------------------------------------------------------------------------------------------------------------|------|----------|
| 209588    | Sectm1a       | secreted and transmembrane 1A                                                                               | 1.43 | 4.20E-07 |
| 66241     | Tmem9         | transmembrane protein 9                                                                                     | 1.42 | 1.50E-06 |
| 78294     | Rps27a        | ribosomal protein S27A                                                                                      | 1.42 | 4.60E-06 |
| 13650     | Rhbdf1        | rhuboid family 1 (Drosophila)                                                                               | 1.42 | 3.80E-06 |
| 12070     | Ngfrap1       | nerve growth factor receptor (TNFRSF16) associated protein 1                                                | 1.42 | 2.60E-07 |
| 13877     | ILMN_212781   | Mus musculus enhancer of rudimentary homolog (Drosophila) (Erb), mRNA.                                      | 1.42 | 5.10E-07 |
| 75430     | ILMN_184438   | Mus musculus RIKEN cDNA 3200002M19 gene (3200002M19Rik), mRNA.                                              | 1.42 | 0.00018  |
| 72061     | 201011101Rik  | RIKEN cDNA 201011101 gene                                                                                   | 1.42 | 2.30E-07 |
| 68948     | 1500011H22Rik | RIKEN cDNA 1500011H22 gene                                                                                  | 1.42 | 3.40E-06 |
| 22247     | Umps          | uridine monophosphate synthetase                                                                            | 1.41 | 3.00E-06 |
| 56390     | Sscca1        | Sjogren's syndrome/scleroderma autoantigen 1 homolog (human)                                                | 1.41 | 1.10E-05 |
| 18391     | Sigmar1       | sigma non-opioid intracellular receptor 1                                                                   | 1.41 | 2.20E-06 |
| 17427     | Mns1          | meiosis-specific nuclear structural protein 1                                                               | 1.41 | 8.20E-07 |
| 17217     | Mcm4          | minichromosome maintenance deficient 4 homolog (S. cerevisiae)                                              | 1.41 | 1.50E-06 |
| 100042777 | ILMN_212781   | PREDICTED: Mus musculus similar to human protein homologous to DROER protein (LOC100042777), mRNA.          | 1.41 | 1.30E-07 |
| 13844     | Ephb2         | Eph receptor B2                                                                                             | 1.41 | 8.90E-07 |
| 69534     | Avp1          | arginine vasopressin-induced 1                                                                              | 1.41 | 5.90E-05 |
| 107503    | Atf5          | activating transcription factor 5                                                                           | 1.41 | 6.30E-05 |
| 27407     | Abcf2         | ATP-binding cassette, sub-family F (GCN20), member 2                                                        | 1.41 | 9.30E-06 |
| 27081     | Zfp275        | zinc finger protein 275                                                                                     | 1.4  | 1.30E-05 |
| 22321     | Vars          | valyl-tRNA synthetase                                                                                       | 1.4  | 5.70E-06 |
| 70356     | St13          | suppression of tumorigenicity 13                                                                            | 1.4  | 0.00054  |
| 20595     | Smn1          | survival motor neuron 1                                                                                     | 1.4  | 1.00E-06 |
| 20563     | Slit2         | slit homolog 2 (Drosophila)                                                                                 | 1.4  | 4.60E-06 |
| 27401     | Skp2          | S-phase kinase-associated protein 2 (p45)                                                                   | 1.4  | 5.60E-06 |
| 435684    | ILMN_245068   | Mus musculus Src homology 2 domain containing F (Shf), mRNA.                                                | 1.4  | 0.00017  |
| 27374     | ILMN_257867   | Mus musculus protein arginine N-methyltransferase 5 (Prmt5), mRNA.                                          | 1.4  | 2.30E-05 |
| 217011    | ILMN_239279   | Mus musculus notchless homolog 1 (Drosophila) (Nle1), mRNA.                                                 | 1.4  | 7.10E-05 |
|           | ILMN_211691   |                                                                                                             | 1.4  | 2.40E-06 |
| 18432     | Mybbp1a       | MYB binding protein (P160) 1a                                                                               | 1.4  | 0.00015  |
| 270058    | Mtap1s        | microtubule-associated protein 1S                                                                           | 1.4  | 1.00E-05 |
| 66902     | Mtap          | methylthioadenosine phosphorylase                                                                           | 1.4  | 1.20E-05 |
| 17220     | Mcm7          | minichromosome maintenance deficient 7 (S. cerevisiae)                                                      | 1.4  | 0.00029  |
| 14450     | Gart          | phosphoribosylglycinamide formyltransferase                                                                 | 1.4  | 2.80E-05 |
| 27407     | Abcf2         | ATP-binding cassette, sub-family F (GCN20), member 2                                                        | 1.4  | 1.00E-05 |
| 11906     | ILMN_192544   | Mus musculus zinc finger homeobox 3 (Zfx3), mRNA.                                                           | 1.39 | 6.60E-07 |
| 319757    | Smo           | smoothened homolog (Drosophila)                                                                             | 1.39 | 4.20E-07 |
| 19891     | Rpa2          | replication protein A2                                                                                      | 1.39 | 3.60E-05 |
| 29870     | Gtse1         | G two S phase expressed protein 1                                                                           | 1.39 | 3.10E-05 |
| 56505     | Ruvb1l        | RuvB-like protein 1                                                                                         | 1.38 | 2.70E-07 |
| 106344    | Rfc4          | replication factor C (activator 1) 4                                                                        | 1.38 | 0.00015  |
| 78929     | ILMN_209245   | Mus musculus polymerase (RNA) III (DNA directed) polypeptide H (Polr3h), mRNA.                              | 1.38 | 8.20E-07 |
| 18008     | Nes           | nestin                                                                                                      | 1.38 | 1.10E-06 |
| 17975     | Ncl           | nucleolin                                                                                                   | 1.38 | 2.40E-06 |
| 70083     | Metm          | meteorin, glial cell differentiation regulator                                                              | 1.38 | 1.80E-05 |
| 15516     | Hsp90ab1      | heat shock protein 90 alpha (cytosolic), class B member 1                                                   | 1.38 | 1.70E-05 |
| 22059     | Trp53         | transformation related protein 53                                                                           | 1.37 | 7.50E-06 |
| 66131     | Tipin         | timeless interacting protein                                                                                | 1.37 | 6.50E-06 |
| 56390     | Sscca1        | Sjogren's syndrome/scleroderma autoantigen 1 homolog (human)                                                | 1.37 | 5.40E-07 |
| 73296     | Rhobtb3       | Rho-related BTB domain containing 3                                                                         | 1.37 | 5.10E-07 |
| 245688    | ILMN_215499   | Mus musculus retinoblastoma binding protein 7 (Rbbp7), mRNA.                                                | 1.37 | 0.00014  |
| 14208     | Ppm1g         | protein phosphatase 1G (formerly 2C), magnesium-dependent, gamma isoform                                    | 1.37 | 3.90E-06 |
| 17768     | Mthfd2        | methylene tetrahydrofolate dehydrogenase (NAD+ dependent), methenyltetrahydrofolate cyclohydrolase          | 1.37 | 1.30E-05 |
| 17089     | Lyar          | Ly1 antibody reactive clone                                                                                 | 1.37 | 9.70E-06 |
| 70465     | ILMN_214857   | Mus musculus WD repeat domain 77 (Wdr77), mRNA.                                                             | 1.36 | 2.00E-07 |
| 66409     | Rsl1d1        | ribosomal L1 domain containing 1                                                                            | 1.36 | 1.60E-06 |
| 20088     | Rps24         | ribosomal protein S24                                                                                       | 1.36 | 7.20E-05 |
| 20019     | Polr1a        | polymerase (RNA) I polypeptide A                                                                            | 1.36 | 1.70E-06 |
| 100046883 | ILMN_217094   | PREDICTED: Mus musculus similar to CKLF-like MARVEL transmembrane domain containing 3 (LOC100046883), mRNA. | 1.36 | 5.00E-05 |
| 27041     | G3bp1         | Ras-GTPase-activating protein SH3-domain binding protein 1                                                  | 1.36 | 2.30E-07 |
| 13681     | Eif4a1        | eukaryotic translation initiation factor 4A1                                                                | 1.36 | 1.20E-06 |
| 12738     | Cldn2         | claudin 2                                                                                                   | 1.36 | 9.70E-06 |
| 56222     | Cited4        | Chp/p300-interacting transactivator, with Glu/Asp-rich carboxy-terminal domain, 4                           | 1.36 | 4.00E-07 |
| 67236     | Cinp          | cyclin-dependent kinase 2 interacting protein                                                               | 1.36 | 2.00E-06 |
| 21414     | Tcf7          | transcription factor 7, T-cell specific                                                                     | 1.35 | 2.10E-07 |
| 110816    | ILMN_212496   | Mus musculus PWP2 periodic tryptophan protein homolog (yeast) (Pwp2), mRNA.                                 | 1.35 | 3.20E-05 |
| 64424     | ILMN_189434   | Mus musculus polymerase (RNA) I polypeptide E (Polr1e), mRNA.                                               | 1.35 | 3.10E-05 |
| 26425     | Nubp1         | nucleotide binding protein 1                                                                                | 1.35 | 4.60E-07 |
| 100608    | Noc4l         | nucleolar complex associated 4 homolog (S. cerevisiae)                                                      | 1.35 | 9.40E-05 |
| 27756     | Lsm2          | LSM2 homolog, U6 small nuclear RNA associated (S. cerevisiae)                                               | 1.35 | 1.00E-06 |
| 217995    | ILMN_214317   | Mus musculus HEAT repeat containing 1 (Heatr1), mRNA.                                                       | 1.35 | 6.80E-05 |
| 13555     | E2f1          | E2F transcription factor 1                                                                                  | 1.35 | 1.70E-07 |
| 21915     | Dtymk         | deoxythymidylate kinase                                                                                     | 1.35 | 0.00016  |
| 66976     | ILMN_212730   | Mus musculus RIKEN cDNA 2410002F23 gene (2410002F23Rik), mRNA.                                              | 1.35 | 2.80E-05 |
| 80914     | Uck2          | uridine-cytidine kinase 2                                                                                   | 1.34 | 2.70E-06 |
| 68926     | Ubap2         | ubiquitin-associated protein 2                                                                              | 1.34 | 5.40E-07 |
| 213391    | Rassf4        | Ras association (RalGDS/AF-6) domain family member 4                                                        | 1.34 | 3.30E-05 |
| 18391     | Sigmar1       | sigma non-opioid intracellular receptor 1                                                                   | 1.34 | 1.50E-06 |
| 18221     | Nude          | nuclear distribution gene C homolog (Aspergillus)                                                           | 1.34 | 2.70E-05 |
| 15516     | Hsp90ab1      | heat shock protein 90 alpha (cytosolic), class B member 1                                                   | 1.34 | 9.40E-05 |
| 101612    | Grwd1         | glutamate-rich WD repeat containing 1                                                                       | 1.34 | 7.00E-04 |
| 56149     | Grasp         | GRP1 (general receptor for phosphoinositides 1)-associated scaffold protein                                 | 1.34 | 7.70E-05 |
| 13007     | Csrp1         | cysteine and glycine-rich protein 1                                                                         | 1.34 | 1.20E-05 |
| 56279     | Fam69b        | family with sequence similarity 69, member B                                                                | 1.34 | 3.00E-06 |
| 223626    | ILMN_219117   | Mus musculus RIKEN cDNA 4930572J05 gene (4930572J05Rik), mRNA.                                              | 1.34 | 0.0016   |
| 66497     | 2610528E23Rik | RIKEN cDNA 2610528E23 gene                                                                                  | 1.34 | 2.60E-05 |
| 56520     | Nme4          | non-metastatic cells 4, protein expressed in                                                                | 1.33 | 1.50E-05 |
| 17304     | Mfge8         | milk fat globule-EGF factor 8 protein                                                                       | 1.33 | 1.80E-05 |
| 100087    | Kti12         | KTI12 homolog, chromatin associated (S. cerevisiae)                                                         | 1.33 | 5.30E-05 |
| 14534     | Kat2a         | K(lysine) acetyltransferase 2A                                                                              | 1.33 | 5.90E-06 |
| 71780     | Isyna1        | myo-inositol 1-phosphate synthase A1                                                                        | 1.33 | 4.10E-05 |
| 14635     | Galk1         | galactokinase 1                                                                                             | 1.33 | 2.50E-07 |
| 14229     | Fkbp5         | FK506 binding protein 5                                                                                     | 1.33 | 0.0067   |
| 207521    | Dtx4          | deltex 4 homolog (Drosophila)                                                                               | 1.33 | 4.10E-07 |
| 12223     | Btc           | betacellulin, epidermal growth factor family member                                                         | 1.33 | 0.00043  |
| 56369     | Apip          | APAF1 interacting protein                                                                                   | 1.33 | 5.50E-06 |
| 233066    | A1428936      | expressed sequence A1428936                                                                                 | 1.33 | 4.20E-06 |
| 27407     | Abcf2         | ATP-binding cassette, sub-family F (GCN20), member 2                                                        | 1.33 | 1.60E-07 |
| 70435     | ILMN_222437   | Mus musculus RIKEN cDNA 2610204M08 gene (2610204M08Rik), mRNA.                                              | 1.33 | 0.00025  |
| 20621     | Snn           | stannin                                                                                                     | 1.32 | 0.00022  |
| 56190     | Rbm38         | RNA binding motif protein 38                                                                                | 1.32 | 0.00013  |
| 100044829 | ILMN_209238   | PREDICTED: Mus musculus similar to Fibrillarlin, transcript variant 1 (LOC100044829), mRNA.                 | 1.32 | 1.10E-06 |
| 70572     | Ipo5          | importin 5                                                                                                  | 1.32 | 4.40E-07 |
|           | ILMN_208668   |                                                                                                             | 1.32 | 3.00E-06 |
| 80876     | Ifitm2        | interferon induced transmembrane protein 2                                                                  | 1.32 | 7.90E-05 |
| 233876    | Hirip3        | HIRA interacting protein 3                                                                                  | 1.32 | 1.70E-07 |
| 14287     | Fpgs          | folylpolyglutamyl synthetase                                                                                | 1.32 | 3.90E-06 |
| 75458     | Cklf          | chemokine-like factor                                                                                       | 1.32 | 4.90E-06 |
| 108673    | Ccdc86        | coiled-coil domain containing 86                                                                            | 1.32 | 0.00016  |
| 77045     | Bcl7a         | B-cell CLL/lymphoma 7A                                                                                      | 1.32 | 3.00E-05 |
| 78354     | 2210407C18Rik | RIKEN cDNA 2210407C18 gene                                                                                  | 1.32 | 0.002    |
| 72322     | Xpo5          | exportin 5                                                                                                  | 1.31 | 1.10E-05 |
| 71354     | Wdr31         | WD repeat domain 31                                                                                         | 1.31 | 3.50E-05 |
| 74196     | Ttc27         | tetratricopeptide repeat domain 27                                                                          | 1.31 | 1.20E-07 |
| 18817     | Plk1          | polo-like kinase 1 (Drosophila)                                                                             | 1.31 | 0.00024  |
| 69912     | Nup43         | nucleoporin 43                                                                                              | 1.31 | 1.70E-07 |
| 100047155 | ILMN_221233   | PREDICTED: Mus musculus similar to Small nuclear ribonucleoprotein polypeptide A (LOC100047155), mRNA.      | 1.31 | 8.80E-07 |

|           |               |                                                                                                          |      |          |
|-----------|---------------|----------------------------------------------------------------------------------------------------------|------|----------|
| 29876     | Clic4         | chloride intracellular channel 4 (mitochondrial)                                                         | 1.31 | 8.70E-06 |
| 11837     | Rplp0         | ribosomal protein, large, P0                                                                             | 1.3  | 9.10E-06 |
| 56190     | Rbm38         | RNA binding motif protein 38                                                                             | 1.3  | 0.00015  |
|           | ILMN_222473   |                                                                                                          | 1.3  | 1.30E-05 |
| 67619     | Nob1          | NIN1/RPN12 binding protein 1 homolog (S. cerevisiae)                                                     | 1.3  | 2.50E-05 |
| 234549    | ILMN_208905   | Mus musculus HEAT repeat containing 3 (Hear3), mRNA.                                                     | 1.3  | 0.00015  |
| 207521    | Dtx4          | deltex 4 homolog (Drosophila)                                                                            | 1.3  | 1.80E-05 |
| 229473    | D930015E06Rik | RIKEN cDNA D930015E06 gene                                                                               | 1.3  | 6.50E-06 |
| 12236     | Bub1b         | budding uninhibited by benzimidazoles 1 homolog, beta (S. cerevisiae)                                    | 1.3  | 3.40E-05 |
| 72657     | 2700094K13Rik | RIKEN cDNA 2700094K13 gene                                                                               | 1.3  | 4.90E-06 |
| 66356     | 2310008H09Rik | RIKEN cDNA 2310008H09 gene                                                                               | 1.3  | 2.70E-07 |
| 107071    | Wdr74         | WD repeat domain 74                                                                                      | 1.29 | 1.10E-05 |
| 73710     | Tubb2b        | tubulin, beta 2B                                                                                         | 1.29 | 1.20E-06 |
| 72960     | Top1mt        | DNA topoisomerase 1, mitochondrial                                                                       | 1.29 | 3.80E-06 |
| 104886    | ILMN_218127   | Mus musculus RAB15, member RAS oncogene family (Rab15), mRNA.                                            | 1.29 | 5.20E-06 |
| 27374     | Prmt5         | protein arginine N-methyltransferase 5                                                                   | 1.29 | 6.60E-06 |
| 68106     | Ni5c3l        | 5'-nucleotidase, cytosolic III-like                                                                      | 1.29 | 7.50E-06 |
| 67134     | Nop56         | NOP56 ribonucleoprotein homolog (yeast)                                                                  | 1.29 | 0.00017  |
| 17865     | ILMN_212854   | Mus musculus myeloblastosis oncogene-like 2 (Mybl2), mRNA.                                               | 1.29 | 7.50E-09 |
| 434858    | ILMN_233946   | Mus musculus predicted gene, EG434858 (EG434858), non-coding RNA.                                        | 1.29 | 0.002    |
| 66143     | Eef1e1        | eukaryotic translation elongation factor 1 epsilon 1                                                     | 1.29 | 3.20E-05 |
| 21771     | Cirh1a        | cirrhosis, autosomal recessive 1A (human)                                                                | 1.29 | 1.30E-05 |
| 26886     | Cenph         | centromere protein H                                                                                     | 1.29 | 0.00033  |
| 74254     | Gpn1          | GPN-loop GTPase 1                                                                                        | 1.28 | 1.80E-05 |
| 56753     | Tacstd2       | tumor-associated calcium signal transducer 2                                                             | 1.28 | 2.60E-07 |
| 72462     | Rpl1b         | ribosomal RNA processing 1 homolog B (S. cerevisiae)                                                     | 1.28 | 0.01     |
| 107094    | Rpl12         | ribosomal RNA processing 12 homolog (S. cerevisiae)                                                      | 1.28 | 1.10E-05 |
| 245688    | ILMN_215499   | Mus musculus retinoblastoma binding protein 7 (Rbbp7), mRNA.                                             | 1.28 | 0.00024  |
| 27280     | Phlda3        | pleckstrin homology-like domain, family A, member 3                                                      | 1.28 | 0.0041   |
| 230721    | Pabpc4        | poly(A) binding protein, cytoplasmic 4                                                                   | 1.28 | 9.40E-05 |
| 97961     | Nol12         | nucleolar protein 12                                                                                     | 1.28 | 3.40E-06 |
| 66164     | Nip7          | nuclear import 7 homolog (S. cerevisiae)                                                                 | 1.28 | 2.50E-06 |
| 17748     | Mt1           | metallothionein 1                                                                                        | 1.28 | 0.00052  |
| 98386     | Lbr           | lamin B receptor                                                                                         | 1.28 | 4.40E-05 |
| 15510     | Hspd1         | heat shock protein 1 (chaperonin)                                                                        | 1.28 | 1.00E-06 |
| 30877     | Gnl3          | guanine nucleotide binding protein-like 3 (nucleolar)                                                    | 1.28 | 2.90E-05 |
| 75458     | Klf           | chemokine-like factor                                                                                    | 1.28 | 5.70E-06 |
| 69928     | Apid1         | apoptosis-inducing, TAF9-like domain 1                                                                   | 1.28 | 0.00019  |
| 66409     | Rsl1d1        | ribosomal L1 domain containing 1                                                                         | 1.27 | 0.00028  |
| 245688    | ILMN_215499   | Mus musculus retinoblastoma binding protein 7 (Rbbp7), mRNA.                                             | 1.27 | 0.0011   |
| 214572    | Prmt7         | protein arginine N-methyltransferase 7                                                                   | 1.27 | 6.50E-06 |
| 29858     | Pmm1          | phosphomannomutase 1                                                                                     | 1.27 | 0.00013  |
| 384793    | ILMN_246137   | Mus musculus nuclear distribution gene C homolog (Aspergillus), pseudogene 1 (Nudc-ps1), non-coding RNA. | 1.27 | 3.40E-05 |
| 217431    | Nol10         | nucleolar protein 10                                                                                     | 1.27 | 2.00E-05 |
| 110109    | Nop2          | NOP2 nucleolar protein homolog (yeast)                                                                   | 1.27 | 7.10E-05 |
| 100045484 | ILMN_211590   | PREDICTED: Mus musculus similar to GFRalpha-3 (LOC100045484), mRNA.                                      | 1.27 | 2.70E-05 |
| 226519    | ILMN_232528   | Mus musculus laminin, gamma 1 (Lamc1), mRNA.                                                             | 1.27 | 0.00017  |
| 23872     | Ets2          | E26 avian leukemia oncogene 2, 3' domain                                                                 | 1.27 | 8.20E-06 |
| 20624     | Eftud2        | elongation factor Tu GTP binding domain containing 2                                                     | 1.27 | 6.90E-07 |
| 52874     | D19Bwg1357e   | DNA segment, Chr 19, Brigham & Women's Genetics 1357 expressed                                           | 1.27 | 1.30E-05 |
| 59053     | Fam203a       | family with sequence similarity 203, member A                                                            | 1.27 | 4.40E-06 |
| 12144     | Blm           | Bloom syndrome, RecQ helicase-like                                                                       | 1.27 | 9.20E-06 |
| 494504    | Apcdd1        | adenomatous polyposis coli down-regulated 1                                                              | 1.27 | 3.00E-06 |
| 17025     | ILMN_215056   | Mus musculus aminolevulinatase, delta-, dehydratase (Alad), mRNA.                                        | 1.27 | 6.70E-06 |
| 22419     | Wnt5b         | wntless-related MMTV integration site 5B                                                                 | 1.26 | 1.90E-07 |
|           | ILMN_213714   |                                                                                                          | 1.26 | 0.00011  |
| 93737     | Pard6g        | par-6 partitioning defective 6 homolog gamma (C. elegans)                                                | 1.26 | 1.70E-06 |
| 18221     | Nudc          | nuclear distribution gene C homolog (Aspergillus)                                                        | 1.26 | 5.10E-07 |
| 17219     | Mcm6          | minichromosome maintenance deficient 6 (MISS homolog, S. pombe) (S. cerevisiae)                          | 1.26 | 0.00012  |
| 107351    | Kank1         | KN motif and ankyrin repeat domains 1                                                                    | 1.26 | 4.20E-06 |
| 23917     | Impdh1        | inosine 5'-phosphate dehydrogenase 1                                                                     | 1.26 | 0.0063   |
| 69639     | Exosc8        | exosome component 8                                                                                      | 1.26 | 8.20E-06 |
| 14026     | ILMN_221136   | Mus musculus Ena-vasodilator stimulated phosphoprotein (Evl), mRNA. XM_923143                            | 1.26 | 2.50E-05 |
| 74107     | Cep55         | centrosomal protein 55                                                                                   | 1.26 | 3.10E-05 |
|           | ILMN_212926   |                                                                                                          | 1.26 | 0.00075  |
| 319278    | A230050P20Rik | RIKEN cDNA A230050P20 gene                                                                               | 1.26 | 0.00015  |
| 19027     | Sypl          | synaptophysin-like protein                                                                               | 1.25 | 1.30E-06 |
| 66406     | Sac3d1        | SAC3 domain containing 1                                                                                 | 1.25 | 0.00017  |
| 58887     | ILMN_210453   | Mus musculus replication initiator 1 (Repin1), transcript variant 5, mRNA.                               | 1.25 | 8.70E-06 |
| 213391    | Rassf4        | Ras association (RalGDS/AF-6) domain family member 4                                                     | 1.25 | 4.10E-05 |
| 214572    | Prmt7         | protein arginine N-methyltransferase 7                                                                   | 1.25 | 1.20E-06 |
| 52033     | Pbk           | PDZ binding kinase                                                                                       | 1.25 | 8.90E-06 |
| 100046953 | ILMN_213254   | PREDICTED: Mus musculus similar to Rab6 interacting protein 1 (LOC100046953), mRNA.                      | 1.25 | 1.90E-07 |
| 231670    | Fbxo21        | F-box protein 21                                                                                         | 1.25 | 3.60E-05 |
| 211651    | Fancd2        | Fanconi anemia, complementation group D2                                                                 | 1.25 | 7.90E-06 |
| 12144     | Blm           | Bloom syndrome, RecQ helicase-like                                                                       | 1.25 | 5.00E-06 |
| 76895     | Bicd2         | bicaudal D homolog 2 (Drosophila)                                                                        | 1.25 | 5.40E-05 |
| 66637     | Tsen15        | tRNA splicing endonuclease 15 homolog (S. cerevisiae)                                                    | 1.25 | 4.10E-06 |
| 67671     | Rpl38         | ribosomal protein L38                                                                                    | 1.24 | 5.00E-04 |
| 19366     | Rad54l        | RAD54 like (S. cerevisiae)                                                                               | 1.24 | 5.10E-07 |
| 52683     | Ncaph2        | non-SMC condensin II complex, subunit H2                                                                 | 1.24 | 6.60E-07 |
| 100047490 | ILMN_221509   | PREDICTED: Mus musculus similar to putative oral cancer suppressor (LOC100047490), mRNA.                 | 1.24 | 5.40E-07 |
| 246293    | Klhl8         | kelch-like 8 (Drosophila)                                                                                | 1.24 | 1.90E-05 |
|           | ILMN_186180   |                                                                                                          | 1.24 | 5.70E-07 |
| 14252     | Flot2         | flotillin 2                                                                                              | 1.24 | 1.70E-05 |
| 20624     | Eftud2        | elongation factor Tu GTP binding domain containing 2                                                     | 1.24 | 3.90E-06 |
| 66336     | Cenpp         | centromere protein P                                                                                     | 1.24 | 1.50E-05 |
| 12462     | Cct3          | chaperonin containing Tcp1, subunit 3 (gamma)                                                            | 1.24 | 1.20E-05 |
| 20308     | Ccl9          | chemokine (C-C motif) ligand 9                                                                           | 1.24 | 0.00024  |
| 66912     | Bzw2          | basic leucine zipper and W2 domains 2                                                                    | 1.24 | 4.00E-05 |
| 22340     | Vegfb         | vascular endothelial growth factor B                                                                     | 1.23 | 1.00E-04 |
| 30954     | Siva1         | SIVA1, apoptosis-inducing factor                                                                         | 1.23 | 3.80E-05 |
| 20425     | Shmt1         | serine hydroxymethyltransferase 1 (soluble)                                                              | 1.23 | 0.00015  |
| 75416     | Nop14         | NOP14 nucleolar protein homolog (yeast)                                                                  | 1.23 | 3.20E-05 |
| 68092     | Ncbp2         | nuclear cap binding protein subunit 2                                                                    | 1.23 | 2.70E-06 |
| 677205    | ILMN_212422   | PREDICTED: Mus musculus similar to DEAD (Asp-Glu-Ala-Asp) box polypeptide 18 (LOC677205), misc RNA.      | 1.23 | 1.60E-06 |
| 15505     | Hsph1         | heat shock 105kDa/110kDa protein 1                                                                       | 1.23 | 1.00E-04 |
| 73284     | Ddit4l        | DNA-damage-inducible transcript 4-like                                                                   | 1.23 | 0.0036   |
| 68183     | Bcas2         | breast carcinoma amplified sequence 2                                                                    | 1.23 | 1.20E-05 |
| 71449     | ILMN_221329   | Mus musculus RIKEN cDNA 5630401D24 gene (5630401D24Rik), mRNA.                                           | 1.23 | 0.00034  |
| 74237     | Tubgcp2       | tubulin, gamma complex associated protein 2                                                              | 1.22 | 1.00E-06 |
| 66637     | Tsen15        | tRNA splicing endonuclease 15 homolog (S. cerevisiae)                                                    | 1.22 | 2.00E-04 |
| 101739    | Psp1          | PC4 and SFRS1 interacting protein 1                                                                      | 1.22 | 1.40E-05 |
| 54563     | Nup210        | nucleoporin 210                                                                                          | 1.22 | 1.70E-05 |
| 66225     | ILMN_209045   | Mus musculus LLP homolog, long-term synaptic facilitation (Aplysia) (Llph), mRNA.                        | 1.22 | 2.70E-06 |
| 69237     | Gtbp4         | GTP binding protein 4                                                                                    | 1.22 | 2.40E-06 |
| 14719     | Got2          | glutamate oxaloacetate transaminase 2, mitochondrial                                                     | 1.22 | 6.30E-07 |
| 56095     | Ftsj3         | FtsJ homolog 3 (E. coli)                                                                                 | 1.22 | 6.60E-05 |
| 71963     | Cdca4         | cell division cycle associated 4                                                                         | 1.22 | 6.00E-07 |
| 381101    | BC048355      | cDNA sequence BC048355                                                                                   | 1.22 | 5.10E-05 |
| 230234    | BC026590      | cDNA sequence BC026590                                                                                   | 1.22 | 3.00E-04 |
| 213539    | Bag2          | BCL2-associated athanogene 2                                                                             | 1.22 | 1.20E-07 |
| 104732    | 4930427A07Rik | RIKEN cDNA 4930427A07 gene                                                                               | 1.22 | 8.70E-05 |
| 56412     | 2610024G14Rik | RIKEN cDNA 2610024G14 gene                                                                               | 1.22 | 1.30E-05 |
| 230734    | Yrdc          | yrdC domain containing (E.coli)                                                                          | 1.21 | 6.20E-05 |
| 28035     | Usp39         | ubiquitin specific peptidase 39                                                                          | 1.21 | 0.00022  |
| 20907     | Stx1a         | syntaxin 1A (brain)                                                                                      | 1.21 | 1.80E-06 |

|           |               |                                                                                                                                                    |      |          |
|-----------|---------------|----------------------------------------------------------------------------------------------------------------------------------------------------|------|----------|
| 71729     | Rgs12         | regulator of G-protein signaling 12                                                                                                                | 1.21 | 0.00015  |
| 19072     | Prep          | prolyl endopeptidase                                                                                                                               | 1.21 | 6.90E-08 |
| 68606     | Ppm1f         | protein phosphatase 1F (PP2C domain containing)                                                                                                    | 1.21 | 2.20E-06 |
| 11545     | Parp1         | poly (ADP-ribose) polymerase family, member 1                                                                                                      | 1.21 | 1.50E-06 |
| 70024     | Mcm10         | minichromosome maintenance deficient 10 (S. cerevisiae)                                                                                            | 1.21 | 4.30E-07 |
| 16881     | Lig1          | ligase I, DNA, ATP-dependent                                                                                                                       | 1.21 | 2.00E-05 |
| 15186     | Hdc           | histidine decarboxylase                                                                                                                            | 1.21 | 0.039    |
| 50496     | ILMN_220573   | Mus musculus E2F transcription factor 6 (E2f6), mRNA.                                                                                              | 1.21 | 0.00033  |
| 12411     | Cbs           | cystathionine beta-synthase                                                                                                                        | 1.21 | 3.50E-07 |
| 69719     | Cad           | carbamoyl-phosphate synthetase 2, aspartate transcarbamylase, and dihydroorotase                                                                   | 1.21 | 0.00027  |
| 230376    | Haus6         | HAUS augmin-like complex, subunit 6                                                                                                                | 1.21 | 0.00032  |
| 104367    | Snor65        | small nucleolar RNA, H/ACA box 65                                                                                                                  | 1.2  | 4.40E-05 |
| 227059    | Slc39a10      | solute carrier family 39 (zinc transporter), member 10                                                                                             | 1.2  | 6.40E-06 |
| 217847    | Serpina10     | serine (or cysteine) peptidase inhibitor, clade A (alpha-1 antiprotease, antitrypsin), member 10                                                   | 1.2  | 0.00037  |
| 100088    | Rcc1          | regulator of chromosome condensation 1                                                                                                             | 1.2  | 1.20E-05 |
| 445007    | Nup85         | nucleoporin 85                                                                                                                                     | 1.2  | 0.0014   |
| 57753     | Noc3l         | nucleolar complex associated 3 homolog (S. cerevisiae)                                                                                             | 1.2  | 1.50E-07 |
| 17219     | Mcm6          | minichromosome maintenance deficient 6 (MISS homolog, S. pombe) (S. cerevisiae)                                                                    | 1.2  | 3.00E-07 |
| 230233    | ILMN_194092   | Mus musculus inhibitor of kappa light polypeptide enhancer in B-cells, kinase complex-associated protein (Ikbkap), mRNA.                           | 1.2  | 3.00E-06 |
| 15937     | Ier3          | immediate early response 3                                                                                                                         | 1.2  | 4.40E-05 |
| 228366    | Gylt1b        | glycosyltransferase-like 1B                                                                                                                        | 1.2  | 5.60E-06 |
| 27979     | Eif3b         | eukaryotic translation initiation factor 3, subunit B                                                                                              | 1.2  | 3.40E-05 |
| 13106     | Cyp2e1        | cytochrome P450, family 2, subfamily e, polypeptide 1                                                                                              | 1.2  | 5.60E-06 |
| 12028     | Bax           | BCL2-associated X protein                                                                                                                          | 1.2  | 0.00027  |
| 214579    | Aldh5a1       | aldehyde dehydrogenase family 5, subfamily A1                                                                                                      | 1.2  | 3.40E-08 |
| 68026     | 2810417H13Rik | RIKEN cDNA 2810417H13 gene                                                                                                                         | 1.2  | 0.00086  |
| 73635     | 1700113I22Rik | RIKEN cDNA 1700113I22 gene                                                                                                                         | 1.2  | 1.80E-06 |
| 83669     | Wdr6          | WD repeat domain 6                                                                                                                                 | 1.19 | 0.00028  |
| 20931     | Surf2         | surfeit gene 2                                                                                                                                     | 1.19 | 1.50E-06 |
| 70358     | Steap1        | six transmembrane epithelial antigen of the prostate 1                                                                                             | 1.19 | 2.50E-06 |
| 20496     | ILMN_211631   | Mus musculus solute carrier family 12, member 2 (Slc12a2), mRNA.                                                                                   | 1.19 | 3.10E-05 |
| 22121     | Rpl13a        | ribosomal protein L13A                                                                                                                             | 1.19 | 4.80E-05 |
| 69241     | Polr2d        | polymerase (RNA) II (DNA directed) polypeptide D                                                                                                   | 1.19 | 4.10E-08 |
| 56520     | Nme4          | non-metastatic cells 4, protein expressed in                                                                                                       | 1.19 | 5.50E-05 |
| 17938     | Naca          | nascent polypeptide-associated complex alpha polypeptide                                                                                           | 1.19 | 6.60E-07 |
| 107435    | Hat1          | histone aminotransferase 1                                                                                                                         | 1.19 | 3.40E-06 |
| 228366    | Gylt1b        | glycosyltransferase-like 1B                                                                                                                        | 1.19 | 2.30E-05 |
| 14776     | Gpx2          | glutathione peroxidase 2                                                                                                                           | 1.19 | 4.20E-06 |
| 50496     | ILMN_220573   | Mus musculus E2F transcription factor 6 (E2f6), mRNA.                                                                                              | 1.19 | 5.50E-06 |
| 228889    | Ddx27         | DEAD (Asp-Glu-Ala-Asp) box polypeptide 27                                                                                                          | 1.19 | 4.20E-06 |
| 68087     | ILMN_218673   | Mus musculus dephospho-CoA kinase domain containing (Dcackd), mRNA.                                                                                | 1.19 | 3.80E-07 |
| 51797     | Ctps          | cytidine 5'-triphosphate synthase                                                                                                                  | 1.19 | 0.00013  |
| 207785    | Csrnp2        | cysteine-serine-rich nuclear protein 2                                                                                                             | 1.19 | 7.30E-07 |
| 72155     | Cenpn         | centromere protein N                                                                                                                               | 1.19 | 6.80E-05 |
| 212547    | ILMN_244646   | Mus musculus cDNA sequence BC027231 (BC027231), mRNA.                                                                                              | 1.19 | 1.00E-05 |
| 72635     | Lins          | lines homolog (Drosophila)                                                                                                                         | 1.18 | 2.10E-06 |
| 67534     | Tll4          | tubulin tyrosine ligase-like family, member 4                                                                                                      | 1.18 | 2.50E-05 |
| 330836    | Slc7a6        | solute carrier family 7 (cationic amino acid transporter, y+ system), member 6                                                                     | 1.18 | 1.80E-06 |
| 60507     | ILMN_219623   | Mus musculus queuine tRNA-ribosyltransferase 1 (Qtrt1), mRNA.                                                                                      | 1.18 | 1.50E-07 |
| 107607    | Nod1          | nucleotide-binding oligomerization domain containing 1                                                                                             | 1.18 | 1.40E-05 |
| 17535     | Mre11a        | meiotic recombination 11 homolog A (S. cerevisiae)                                                                                                 | 1.18 | 3.80E-06 |
| 57905     | Isy1          | ISY1 splicing factor homolog (S. cerevisiae)                                                                                                       | 1.18 | 2.80E-06 |
| 209357    | ILMN_185469   | Mus musculus general transcription factor IIH, polypeptide 3 (Gtf2h3), mRNA.                                                                       | 1.18 | 3.20E-06 |
| 14866     | Gstm5         | glutathione S-transferase, mu 5                                                                                                                    | 1.18 | 2.00E-05 |
| 268527    | ILMN_242588   | Mus musculus gene regulated by estrogen in breast cancer protein (Greb1), mRNA.                                                                    | 1.18 | 0.00024  |
| 23886     | Gdf15         | growth differentiation factor 15                                                                                                                   | 1.18 | 0.037    |
| 233908    | Fus           | fusion, derived from t(12;16) malignant liposarcoma (human)                                                                                        | 1.18 | 0.0031   |
| 192176    | Flna          | filamin, alpha                                                                                                                                     | 1.18 | 0.00024  |
| 50496     | E2f6          | E2F transcription factor 6                                                                                                                         | 1.18 | 5.70E-05 |
| 66570     | Cenpm         | centromere protein M                                                                                                                               | 1.18 | 3.20E-07 |
| 330050    | Fam185a       | family with sequence similarity 185, member A                                                                                                      | 1.18 | 2.00E-06 |
| 11906     | Zfx3          | zinc finger homeobox 3                                                                                                                             | 1.17 | 4.20E-06 |
| 71446     | Wrb           | tryptophan rich basic protein                                                                                                                      | 1.17 | 5.30E-06 |
| 73674     | Wdr75         | WD repeat domain 75                                                                                                                                | 1.17 | 2.00E-05 |
| 27366     | Txn14a        | thioredoxin-like 4A                                                                                                                                | 1.17 | 7.30E-06 |
| 326618    | Tpm4          | tropomyosin 4                                                                                                                                      | 1.17 | 8.70E-05 |
| 209588    | Sectm1a       | secreted and transmembrane 1A                                                                                                                      | 1.17 | 0.00032  |
| 80837     | Rhoj          | ras homolog gene family, member J                                                                                                                  | 1.17 | 0.0012   |
| 18971     | Pold1         | polymerase (DNA directed), delta 1, catalytic subunit                                                                                              | 1.17 | 9.00E-05 |
| 18969     | Polr2         | polymerase (DNA directed), alpha 2                                                                                                                 | 1.17 | 8.90E-06 |
| 234865    | Nup133        | nucleoporin 133                                                                                                                                    | 1.17 | 0.00086  |
| 68106     | Nt5c3l        | 5'-nucleotidase, cytosolic III-like                                                                                                                | 1.17 | 1.70E-05 |
| 404710    | ILMN_250781   | Mus musculus IQ motif containing GTPase activating protein 3 (Iqgap3), mRNA. XM_980709 XM_987883 XM_987929 XM_987972 XM_988004 XM_988041 XM_988104 | 1.17 | 0.0012   |
| 15375     | ILMN_221873   | Mus musculus forkhead box A1 (Foxa1), mRNA.                                                                                                        | 1.17 | 3.40E-06 |
| 72544     | Exosc6        | exosome component 6                                                                                                                                | 1.17 | 1.70E-05 |
| 232813    | Shisa7        | shisa homolog 7 (Xenopus laevis)                                                                                                                   | 1.17 | 8.90E-06 |
| 56693     | Crtap         | cartilage associated protein                                                                                                                       | 1.17 | 1.10E-05 |
| 67291     | Ccdc137       | coiled-coil domain containing 137                                                                                                                  | 1.17 | 3.30E-05 |
| 217737    | Ahsa1         | AHA1, activator of heat shock protein ATPase homolog 1 (yeast)                                                                                     | 1.17 | 1.10E-06 |
| 215193    | Diexf         | digestive organ expansion factor homolog (zebrafish)                                                                                               | 1.17 | 8.90E-06 |
| 19387     | ILMN_258002   | Mus musculus RAN GTPase activating protein 1 (Rangap1), mRNA.                                                                                      | 1.16 | 2.30E-07 |
| 110639    | Prps2         | phosphoribosyl pyrophosphate synthetase 2                                                                                                          | 1.16 | 0.00091  |
| 18780     | Pla2g2a       | phospholipase A2, group IIA (platelets, synovial fluid)                                                                                            | 1.16 | 0.0045   |
| 18538     | ILMN_223289   | Mus musculus proliferating cell nuclear antigen (Pcna), mRNA.                                                                                      | 1.16 | 0.00065  |
| 67619     | Nob1          | NIN1/RPN12 binding protein 1 homolog (S. cerevisiae)                                                                                               | 1.16 | 0.00045  |
| 77286     | Nkrf          | NF-kappaB repressing factor                                                                                                                        | 1.16 | 5.00E-06 |
| 17975     | Ncl           | nucleolin                                                                                                                                          | 1.16 | 4.60E-06 |
| 50927     | ILMN_211691   | Mus musculus nuclear autoantigenic sperm protein (histone-binding) (Nasp), transcript variant 2, mRNA.                                             | 1.16 | 3.30E-05 |
| 59024     | Med12         | mediator of RNA polymerase II transcription, subunit 12 homolog (yeast)                                                                            | 1.16 | 6.20E-06 |
| 75751     | Ipo4          | importin 4                                                                                                                                         | 1.16 | 2.70E-05 |
| 77065     | Ints7         | integrator complex subunit 7                                                                                                                       | 1.16 | 2.70E-05 |
| 15516     | Hsp90ab1      | heat shock protein 90 alpha (cytosolic), class B member 1                                                                                          | 1.16 | 6.50E-05 |
| 72042     | Cot1          | coactosin-like 1 (Dictyostelium)                                                                                                                   | 1.16 | 1.70E-05 |
| 74268     | Aven          | apoptosis, caspase activation inhibitor                                                                                                            | 1.16 | 9.10E-05 |
| 106877    | Afap111       | actin filament associated protein 1-like 1                                                                                                         | 1.16 | 1.20E-05 |
| 72155     | Cenpn         | centromere protein N                                                                                                                               | 1.16 | 3.40E-06 |
| 232679    | Zc3hc1        | zinc finger, C3HC type 1                                                                                                                           | 1.15 | 2.80E-05 |
| 109161    | Ube2q2        | ubiquitin-conjugating enzyme E2Q (putative) 2                                                                                                      | 1.15 | 2.80E-06 |
| 21853     | ILMN_246642   | Mus musculus timeless homolog (Drosophila) (Timeless), transcript variant 2, mRNA.                                                                 | 1.15 | 0.00012  |
| 20641     | Snrpd1        | small nuclear ribonucleoprotein D1                                                                                                                 | 1.15 | 1.80E-05 |
| 332397    | Nanos1        | nanos homolog 1 (Drosophila)                                                                                                                       | 1.15 | 2.30E-05 |
| 76890     | ILMN_211072   | Mus musculus mediator of cell motility 1 (Memo1), mRNA.                                                                                            | 1.15 | 0.006    |
| 100043257 | ILMN_215552   | PREDICTED: Mus musculus similar to RNA binding motif protein 3 (LOC100043257), mRNA.                                                               | 1.15 | 1.80E-06 |
| 16881     | Lig1          | ligase I, DNA, ATP-dependent                                                                                                                       | 1.15 | 0.00032  |
| 60530     | Fign1         | fidgetin-like 1                                                                                                                                    | 1.15 | 2.00E-05 |
| 56200     | Ddx21         | DEAD (Asp-Glu-Ala-Asp) box polypeptide 21                                                                                                          | 1.15 | 0.0015   |
| 66570     | Cenpm         | centromere protein M                                                                                                                               | 1.15 | 1.90E-06 |
| 12527     | Cd9           | CD9 antigen                                                                                                                                        | 1.15 | 4.80E-05 |
| 12462     | Cct3          | chaperonin containing Tcp1, subunit 3 (gamma)                                                                                                      | 1.15 | 2.70E-05 |
| 381903    | Alg8          | asparagine-linked glycosylation 8 homolog (yeast, alpha-1,3-glucosyltransferase)                                                                   | 1.15 | 0.00018  |
| 240675    | Vwa2          | von Willebrand factor A domain containing 2                                                                                                        | 1.14 | 5.50E-05 |
| 80914     | Uck2          | uridine-cytidine kinase 2                                                                                                                          | 1.14 | 1.70E-05 |
| 22142     | Tuba1a        | tubulin, alpha 1A                                                                                                                                  | 1.14 | 6.20E-05 |
| 21815     | Tgfr1         | TGF-beta-induced factor homeobox 1                                                                                                                 | 1.14 | 0.00015  |
| 19027     | Sypl          | synaptophysin-like protein                                                                                                                         | 1.14 | 1.90E-05 |
| 20638     | Snrpb         | small nuclear ribonucleoprotein B                                                                                                                  | 1.14 | 2.40E-05 |
| 20638     | Snrpb         | small nuclear ribonucleoprotein B                                                                                                                  | 1.14 | 5.30E-06 |



|           |               |                                                                                                                                             |      |          |
|-----------|---------------|---------------------------------------------------------------------------------------------------------------------------------------------|------|----------|
| 98365     | Slamf9        | SLAM family member 9                                                                                                                        | 1.14 | 0.0016   |
| 20969     | Sdc1          | syndecan 1                                                                                                                                  | 1.14 | 1.50E-05 |
| 59028     | Rcl1          | RNA terminal phosphate cyclase-like 1                                                                                                       | 1.14 | 0.00075  |
| 11545     | Parp1         | poly (ADP-ribose) polymerase family, member 1                                                                                               | 1.14 | 3.10E-05 |
| 234865    | Nup133        | nucleoporin 133                                                                                                                             | 1.14 | 2.80E-05 |
| 18029     | Nfic          | nuclear factor I/C                                                                                                                          | 1.14 | 0.011    |
| 17068     | Ly6d          | lymphocyte antigen 6 complex, locus D                                                                                                       | 1.14 | 0.02     |
| 66667     | Hspbp1        | Hspb associated protein 1                                                                                                                   | 1.14 | 2.80E-05 |
| 14756     | Gpld1         | glycosylphosphatidylinositol specific phospholipase D1                                                                                      | 1.14 | 1.10E-05 |
| 14457     | Gas7          | growth arrest specific 7                                                                                                                    | 1.14 | 1.00E-05 |
| 66583     | Exosc1        | exosome component 1                                                                                                                         | 1.14 | 1.60E-05 |
| 276770    | Eif5a         | eukaryotic translation initiation factor 5A                                                                                                 | 1.14 | 4.10E-06 |
| 71919     | Rpap3         | RNA polymerase II associated protein 3                                                                                                      | 1.14 | 9.30E-05 |
| 71963     | Cdca4         | cell division cycle associated 4                                                                                                            | 1.14 | 3.00E-06 |
| 21939     | ILMN_242411   | Mus musculus CD40 antigen (Cd40), transcript variant 5, mRNA.                                                                               | 1.14 | 3.00E-04 |
| 22381     | Wbp5          | WW domain binding protein 5                                                                                                                 | 1.13 | 2.30E-05 |
| 74044     | Ttf2          | transcription termination factor, RNA polymerase II                                                                                         | 1.13 | 2.10E-05 |
| 21983     | Tpbp          | trophoblast glycoprotein                                                                                                                    | 1.13 | 5.70E-06 |
| 56459     | Sae1          | SUMO1 activating enzyme subunit 1                                                                                                           | 1.13 | 1.80E-05 |
| 100609    | Nsun5         | NOL1/NOP2/Sun domain family, member 5                                                                                                       | 1.13 | 0.00011  |
| 20826     | ILMN_210334   | Mus musculus NHP2 non-histone chromosome protein 2-like 1 (S. cerevisiae) (Nhp21), mRNA.                                                    | 1.13 | 3.00E-05 |
| 17535     | Mre11a        | meiotic recombination 11 homolog A (S. cerevisiae)                                                                                          | 1.13 | 3.20E-07 |
| 70024     | Mcm10         | minichromosome maintenance deficient 10 (S. cerevisiae)                                                                                     | 1.13 | 0.00012  |
| 546015    | 301003P07Rik  | PREDICTED: Mus musculus similar to ribosomal protein S9 (LOC546015), misc RNA.                                                              | 1.13 | 5.50E-06 |
| 209737    | ILMN_212864   | Mus musculus kinesin family member 15 (Kif15), mRNA.                                                                                        | 1.13 | 7.30E-06 |
| 69692     | Hdde2         | HD domain containing 2                                                                                                                      | 1.13 | 4.00E-04 |
| 11006     | Gusb          | glucuronidase, beta                                                                                                                         | 1.13 | 0.00065  |
| 381633    | Gm1673        | predicted gene 1673                                                                                                                         | 1.13 | 0.00029  |
| 23834     | Cdc6          | cell division cycle 6 homolog (S. cerevisiae)                                                                                               | 1.13 | 4.90E-06 |
| 76080     | Tpal          | tocopherol (alpha) transfer protein-like                                                                                                    | 1.12 | 0.00015  |
| 20195     | S100a11       | S100 calcium binding protein A11 (calgizzarin)                                                                                              | 1.12 | 2.00E-05 |
| 17463     | Psmc7         | proteasome (prosome, macropain) 26S subunit, non-ATPase, 7                                                                                  | 1.12 | 0.00012  |
| 100609    | Nsun5         | NOL1/NOP2/Sun domain family, member 5                                                                                                       | 1.12 | 7.90E-06 |
| 218121    | Mboat1        | membrane bound O-acyltransferase domain containing 1                                                                                        | 1.12 | 3.00E-04 |
| 16897     | Ljgl1         | lethal giant larvae homolog 1 (Drosophila)                                                                                                  | 1.12 | 9.10E-08 |
| 171463    | Il17rd        | interleukin 17 receptor D                                                                                                                   | 1.12 | 8.10E-05 |
| 55944     | Eif3d         | eukaryotic translation initiation factor 3, subunit D                                                                                       | 1.12 | 9.40E-05 |
| 20624     | Eftud2        | elongation factor Tu GTP binding domain containing 2                                                                                        | 1.12 | 2.20E-06 |
| 12615     | Cenpa         | centromere protein A                                                                                                                        | 1.12 | 1.90E-06 |
| 52276     | Cdca8         | cell division cycle associated 8                                                                                                            | 1.12 | 2.10E-05 |
| 67832     | Brix1         | BRX1, biogenesis of ribosomes, homolog (S. cerevisiae)                                                                                      | 1.12 | 3.10E-05 |
| 51800     | Bok           | BCL2-related ovarian killer protein                                                                                                         | 1.12 | 0.00035  |
| 67211     | Armc10        | armadillo repeat containing 10                                                                                                              | 1.12 | 4.80E-05 |
| 66966     | Trit1         | tRNA isopentenyltransferase 1                                                                                                               | 1.11 | 6.70E-05 |
| 21849     | Trim28        | tripartite motif-containing 28                                                                                                              | 1.11 | 3.00E-05 |
| 72787     | Tmem48        | transmembrane protein 48                                                                                                                    | 1.11 | 2.20E-05 |
| 20637     | Snrp70        | small nuclear ribonucleoprotein 70 (U1)                                                                                                     | 1.11 | 0.00021  |
| 56459     | Sae1          | SUMO1 activating enzyme subunit 1                                                                                                           | 1.11 | 4.90E-07 |
| 69263     | Rfc3          | replication factor C (activator 1) 3                                                                                                        | 1.11 | 3.80E-05 |
| 69833     | Polr2f        | polymerase (RNA) II (DNA directed) polypeptide F                                                                                            | 1.11 | 1.10E-06 |
| 212503    | Paox          | polyamine oxidase (exo-N4-amino)                                                                                                            | 1.11 | 2.50E-05 |
| 68051     | Nutf2         | nuclear transport factor 2                                                                                                                  | 1.11 | 2.80E-06 |
| 28114     | Nsun2         | NOL1/NOP2/Sun domain family member 2                                                                                                        | 1.11 | 2.30E-05 |
| 70603     | Mutyh         | mutY homolog (E. coli)                                                                                                                      | 1.11 | 1.70E-05 |
| 69692     | Hdde2         | HD domain containing 2                                                                                                                      | 1.11 | 1.30E-05 |
| 67553     | Gsted         | glutathione S-transferase, C-terminal domain containing                                                                                     | 1.11 | 1.40E-05 |
| 17178     | Fxyd3         | FXYD domain-containing ion transport regulator 3                                                                                            | 1.11 | 0.00026  |
| 68730     | Dus1l         | dihydrouridine synthase 1-like (S. cerevisiae)                                                                                              | 1.11 | 9.50E-07 |
| 11933     | Atp1b3        | ATPase, Na <sup>+</sup> /K <sup>+</sup> transporting, beta 3 polypeptide                                                                    | 1.11 | 5.30E-06 |
| 77254     | Yip1b         | Yip1 interacting factor homolog B (S. cerevisiae)                                                                                           | 1.1  | 2.90E-05 |
| 20588     | Smarcc1       | SWI/SNF related, matrix associated, actin dependent regulator of chromatin, subfamily c, member 1                                           | 1.1  | 0.00013  |
| 108116    | Sloc3a1       | solute carrier organic anion transporter family, member 3a1                                                                                 | 1.1  | 2.70E-05 |
| 68275     | Rpa1          | replication protein A1                                                                                                                      | 1.1  | 7.60E-07 |
|           | ILMN_218045   |                                                                                                                                             | 1.1  | 2.40E-05 |
| 68799     | Rgmb          | RGM domain family, member B                                                                                                                 | 1.1  | 0.0013   |
| 72151     | Rfc5          | replication factor C (activator 1) 5                                                                                                        | 1.1  | 9.80E-07 |
| 26433     | Plod3         | procollagen-lysine, 2-oxoglutarate 5-dioxygenase 3                                                                                          | 1.1  | 4.40E-05 |
| 18641     | Pfk1          | phosphofructokinase, liver, B-type                                                                                                          | 1.1  | 4.90E-06 |
| 71041     | Pcgr6         | polycomb group ring finger 6                                                                                                                | 1.1  | 1.20E-05 |
| 23943     | Esy1          | extended synaptotagmin-like protein 1                                                                                                       | 1.1  | 1.70E-05 |
| 16319     | Incpn         | inner centromere protein                                                                                                                    | 1.1  | 0.00011  |
| 15528     | ILMN_213386   | Mus musculus heat shock protein 1 (chaperonin 10) (Hspe1), mRNA.                                                                            | 1.1  | 0.00022  |
| 209354    | Eif2b1        | eukaryotic translation initiation factor 2B, subunit 1 (alpha)                                                                              | 1.1  | 0.0015   |
| 13494     | Drg1          | developmentally regulated GTP binding protein 1                                                                                             | 1.1  | 5.70E-05 |
| 216877    | Dhx33         | DEAH (Asp-Glu-Ala-His) box polypeptide 33                                                                                                   | 1.1  | 4.90E-07 |
| 70333     | Cd3eap        | CD3E antigen, epsilon polypeptide associated protein                                                                                        | 1.1  | 0.00075  |
| 66912     | Bzw2          | basic leucine zipper and W2 domains 2                                                                                                       | 1.1  | 2.20E-06 |
| 51800     | Bok           | BCL2-related ovarian killer protein                                                                                                         | 1.1  | 2.30E-07 |
| 330671    | B4galnt4      | beta-1,4-N-acetyl-galactosaminyl transferase 4                                                                                              | 1.1  | 1.00E-04 |
| 74205     | Acs13         | acyl-CoA synthetase long-chain family member 3                                                                                              | 1.1  | 8.40E-06 |
| 66320     | Tmem208       | transmembrane protein 208                                                                                                                   | 1.09 | 9.20E-07 |
| 54141     | Spag5         | sperm associated antigen 5                                                                                                                  | 1.09 | 2.50E-06 |
| 19173     | Psmb5         | proteasome (prosome, macropain) subunit, beta type 5                                                                                        | 1.09 | 0.00056  |
| 71974     | Prmt3         | protein arginine N-methyltransferase 3                                                                                                      | 1.09 | 1.80E-05 |
| 53324     | ILMN_211885   | Mus musculus neuronal pentraxin 2 (Nptx2), mRNA.                                                                                            | 1.09 | 2.70E-06 |
| 116871    | Mta3          | metastasis associated 3                                                                                                                     | 1.09 | 4.00E-05 |
| 229524    | Mstol         | misato homolog 1 (Drosophila)                                                                                                               | 1.09 | 0.00025  |
| 17688     | Msh6          | mutS homolog 6 (E. coli)                                                                                                                    | 1.09 | 4.20E-07 |
| 16201     | Ilf3          | interleukin enhancer binding factor 3                                                                                                       | 1.09 | 3.20E-06 |
| 14297     | Fxn           | frataxin                                                                                                                                    | 1.09 | 9.30E-06 |
| 23873     | Faim          | Fas apoptotic inhibitory molecule                                                                                                           | 1.09 | 9.60E-06 |
| 105298    | ILMN_214840   | Mus musculus ependymin related protein 1 (zebrafish) (Epdrl), mRNA.                                                                         | 1.09 | 1.10E-05 |
| 66757     | Adat2         | adenosine deaminase, tRNA-specific 2, TAD2 homolog (S. cerevisiae)                                                                          | 1.09 | 2.30E-07 |
| 217364    | Engase        | endo-beta-N-acetylglucosaminidase                                                                                                           | 1.09 | 0.00091  |
| 232680    | Cpa2          | carboxypeptidase A2, pancreatic                                                                                                             | 1.09 | 3.10E-05 |
| 66570     | Cenpm         | centromere protein M                                                                                                                        | 1.09 | 5.10E-07 |
| 67239     | Rpf2          | ribosome production factor 2 homolog (S. cerevisiae)                                                                                        | 1.09 | 2.40E-06 |
| 56321     | Aatf          | apoptosis antagonizing transcription factor                                                                                                 | 1.09 | 1.10E-05 |
| 56412     | 2610024G14Rik | RIKEN cDNA 2610024G14 gene                                                                                                                  | 1.09 | 9.30E-06 |
| 66965     | ILMN_198892   | Mus musculus RIKEN cDNA 2310061F22 gene (2310061F22Rik), mRNA.                                                                              | 1.09 | 1.80E-06 |
| 22147     | Tuba3b        | tubulin, alpha 3B                                                                                                                           | 1.08 | 0.00039  |
| 22099     | Tsn           | translin                                                                                                                                    | 1.08 | 0.0012   |
| 71982     | Snx10         | sorting nexin 10                                                                                                                            | 1.08 | 6.60E-05 |
| 226830    | Smyd2         | SET and MYND domain containing 2                                                                                                            | 1.08 | 5.90E-06 |
| 107701    | S3b4          | splicing factor 3b, subunit 4                                                                                                               | 1.08 | 0.0012   |
| 108943    | ILMN_214434   | Mus musculus RNA (guanine-9-) methyltransferase domain containing 2 (Rg9mtd2), mRNA.                                                        | 1.08 | 1.60E-05 |
| 18637     | Pfdn2         | prefoldin 2                                                                                                                                 | 1.08 | 7.00E-06 |
| 67399     | Pdlim7        | PDZ and LIM domain 7                                                                                                                        | 1.08 | 6.50E-06 |
| 65102     | Nif31l        | Ngg1 interacting factor 3-like 1 (S. pombe)                                                                                                 | 1.08 | 0.0012   |
| 215387    | Ncaph         | non-SMC condensin I complex, subunit H                                                                                                      | 1.08 | 0.00075  |
| 17869     | Myc           | myelocytomatosis oncogene                                                                                                                   | 1.08 | 0.00038  |
| 50918     | ILMN_221407   | Mus musculus myeloid-associated differentiation marker (Myadm), mRNA.                                                                       | 1.08 | 4.60E-06 |
| 17299     | Metll1        | methyltransferase like 1                                                                                                                    | 1.08 | 5.30E-05 |
| 100045019 | ILMN_195453   | PREDICTED: Mus musculus similar to Tubulin, gamma 2 (LOC100045019), mRNA.                                                                   | 1.08 | 0.00015  |
| 107045    | ILMN_234717   | Mus musculus leucyl-tRNA synthetase (Lars), mRNA. XM_901187 XM_913429 XM_922755 XM_922767 XM_922771 XM_922775 XM_922782 XM_922785 XM_989215 | 1.08 | 2.40E-05 |
| 15382     | ILMN_257803   | Mus musculus heterogeneous nuclear ribonucleoprotein A1 (Hnrpa1), transcript variant 2, mRNA.                                               | 1.08 | 0.00096  |
| 14156     | Fen1          | flap structure specific endonuclease 1                                                                                                      | 1.08 | 2.80E-05 |

|           |               |                                                                                                                                          |      |          |
|-----------|---------------|------------------------------------------------------------------------------------------------------------------------------------------|------|----------|
| 105988    | Esp1          | extra spindle poles-like 1 ( <i>S. cerevisiae</i> )                                                                                      | 1.08 | 2.20E-05 |
| 13494     | Drp1          | developmentally regulated GTP binding protein 1                                                                                          | 1.08 | 5.00E-06 |
| 240514    | Cdc85b        | coiled-coil domain containing 85B                                                                                                        | 1.08 | 0.00013  |
| 192120    | Bspry         | B-box and SPRY domain containing                                                                                                         | 1.08 | 2.00E-06 |
| 12033     | Bcap29        | B-cell receptor-associated protein 29                                                                                                    | 1.08 | 0.00047  |
| 27078     | B9d1          | B9 protein domain 1                                                                                                                      | 1.08 | 2.50E-05 |
| 11601     | Angpt2        | angiopoietin 2                                                                                                                           | 1.08 | 1.00E-04 |
| 59008     | Anapc5        | anaphase-promoting complex subunit 5                                                                                                     | 1.08 | 0.0018   |
| 68099     | Fam92a        | family with sequence similarity 92, member A                                                                                             | 1.08 | 3.00E-06 |
| 68964     | 1500010J02Rik | RIKEN cDNA 1500010J02 gene                                                                                                               | 1.08 | 3.10E-07 |
| 71735     | Lrwd1         | leucine-rich repeats and WD repeat domain containing 1                                                                                   | 1.08 | 5.60E-06 |
| 28035     | Usp39         | ubiquitin specific peptidase 39                                                                                                          | 1.07 | 0.00075  |
| 20867     | Stip1         | stress-induced phosphoprotein 1                                                                                                          | 1.07 | 1.20E-05 |
|           | ILMN_212426   |                                                                                                                                          | 1.07 | 4.40E-05 |
| 19367     | Rad9          | RAD9 homolog ( <i>S. pombe</i> )                                                                                                         | 1.07 | 8.20E-06 |
| 214572    | Prmt7         | protein arginine N-methyltransferase 7                                                                                                   | 1.07 | 3.40E-05 |
| 67037     | Pmf1          | polyamine-modulated factor 1                                                                                                             | 1.07 | 2.40E-05 |
| 212503    | ILMN_212962   | Mus musculus polyamine oxidase (exo-N4-amino) (Paox), mRNA.                                                                              | 1.07 | 2.70E-05 |
| 110109    | Nop2          | NOP2 nucleolar protein homolog (yeast)                                                                                                   | 1.07 | 6.20E-05 |
| 68298     | Ncapd2        | non-SMC condensin I complex, subunit D2                                                                                                  | 1.07 | 0.00047  |
| 17938     | Naca          | nascent polypeptide-associated complex alpha polypeptide                                                                                 | 1.07 | 8.20E-05 |
| 110033    | Kif22         | kinesin family member 22                                                                                                                 | 1.07 | 4.30E-05 |
| 229504    | ILMN_211620   | Mus musculus interferon stimulated exonuclease gene 20-like 2 (Isg20I2), mRNA.                                                           | 1.07 | 0.00065  |
| 105148    | Iars          | isoleucine-tRNA synthetase                                                                                                               | 1.07 | 5.80E-05 |
| 15481     | Hspa8         | heat shock protein 8                                                                                                                     | 1.07 | 0.00015  |
| 381633    | Gm1673        | predicted gene 1673                                                                                                                      | 1.07 | 0.0019   |
| 104346    | Gas8          | growth arrest specific 8                                                                                                                 | 1.07 | 2.80E-05 |
| 15377     | Foxa3         | forkhead box A3                                                                                                                          | 1.07 | 9.40E-05 |
| 22791     | Dnajc2        | Dnaj (Hsp40) homolog, subfamily C, member 2                                                                                              | 1.07 | 0.00015  |
| 27214     | Dbf4          | DBF4 homolog ( <i>S. cerevisiae</i> )                                                                                                    | 1.07 | 1.60E-05 |
| 27373     | Csnk1e        | casein kinase 1, epsilon                                                                                                                 | 1.07 | 0.0063   |
| 12630     | ILMN_212927   | Mus musculus complement component factor i (Cfi), mRNA.                                                                                  | 1.07 | 0.00026  |
| 12520     | Cd81          | CD81 antigen                                                                                                                             | 1.07 | 4.90E-07 |
| 14025     | Bcl11a        | B-cell CLL/lymphoma 11A (zinc finger protein)                                                                                            | 1.07 | 8.10E-05 |
| 212547    | ILMN_218852   | Mus musculus cDNA sequence BC027231 (BC027231), mRNA.                                                                                    | 1.07 | 0.0036   |
| 225215    | Rsl24d1       | ribosomal L24 domain containing 1                                                                                                        | 1.07 | 3.80E-06 |
| 72141     | Adpgk         | ADP-dependent glucokinase                                                                                                                | 1.07 | 1.90E-05 |
| 109711    | ILMN_242046   | Mus musculus actinin, alpha 1 (Actn1), mRNA.                                                                                             | 1.07 | 6.90E-05 |
| 242864    | Napepld       | N-acyl phosphatidylethanolamine phospholipase D                                                                                          | 1.07 | 3.60E-06 |
| 77254     | Yif1b         | Yif1 interacting factor homolog B ( <i>S. cerevisiae</i> )                                                                               | 1.07 | 0.00043  |
| 27366     | Txn14a        | thioredoxin-like 4A                                                                                                                      | 1.06 | 2.20E-06 |
| 56403     | Syncrip       | synaptotagmin binding, cytoplasmic RNA interacting protein                                                                               | 1.06 | 2.20E-05 |
| 77634     | Snapc3        | small nuclear RNA activating complex, polypeptide 3                                                                                      | 1.06 | 3.30E-05 |
| 232187    | Smyd5         | SET and MYND domain containing 5                                                                                                         | 1.06 | 0.00051  |
| 50721     | Sirt6         | sirtuin 6 (silent mating type information regulation 2, homolog) 6 ( <i>S. cerevisiae</i> )                                              | 1.06 | 8.60E-06 |
| 102866    | Pls3          | plastin 3 (T-isoform)                                                                                                                    | 1.06 | 0.00091  |
| 18148     | ILMN_252426   | Mus musculus nucleophosmin 1 (Npm1), mRNA.                                                                                               | 1.06 | 1.30E-05 |
| 228869    | Ncoa5         | nuclear receptor coactivator 5                                                                                                           | 1.06 | 2.10E-05 |
| 105837    | Mtbp          | Mdm2, transformed 3T3 cell double minute p53 binding protein                                                                             | 1.06 | 1.10E-05 |
| 56280     | Mpl37         | mitochondrial ribosomal protein L37                                                                                                      | 1.06 | 1.10E-05 |
| 56307     | Metap2        | methionine aminopeptidase 2                                                                                                              | 1.06 | 2.00E-04 |
| 15510     | ILMN_213620   | Mus musculus heat shock protein 1 (chaperonin) (Hspd1), mRNA.                                                                            | 1.06 | 0.015    |
| 78455     | Helz          | helicase with zinc finger domain                                                                                                         | 1.06 | 0.003    |
| 30877     | Gnl3          | guanine nucleotide binding protein-like 3 (nucleolar)                                                                                    | 1.06 | 0.0067   |
| 57436     | Gabarapl1     | gamma-aminobutyric acid (GABA) A receptor-associated protein-like 1                                                                      | 1.06 | 7.00E-04 |
| 212377    | Mms22l        | MMS22-like, DNA repair protein                                                                                                           | 1.06 | 0.00096  |
| 66656     | ILMN_255308   | Mus musculus eukaryotic translation elongation factor 1 delta (guanine nucleotide exchange protein) (Eef1d), transcript variant 1, mRNA. | 1.06 | 5.80E-05 |
| 56455     | ILMN_233335   | Mus musculus dynein light chain LC8-type 1 (Dynll1), mRNA.                                                                               | 1.06 | 3.60E-06 |
| 67728     | Dph2          | DPH2 homolog ( <i>S. cerevisiae</i> )                                                                                                    | 1.06 | 0.00064  |
| 12566     | Cdk2          | cyclin-dependent kinase 2                                                                                                                | 1.06 | 3.50E-05 |
| 268880    | ILMN_219150   | Mus musculus expressed sequence AI480653 (AI480653), mRNA.                                                                               | 1.06 | 4.30E-05 |
| 71952     | 2410016O06Rik | RIKEN cDNA 2410016O06 gene                                                                                                               | 1.06 | 0.00011  |
| 22687     | Zfp259        | zinc finger protein 259                                                                                                                  | 1.05 | 5.00E-04 |
| 57773     | Wdr4          | WD repeat domain 4                                                                                                                       | 1.05 | 0.00086  |
| 216156    | Wdr18         | WD repeat domain 18                                                                                                                      | 1.05 | 2.40E-05 |
| 28035     | Usp39         | ubiquitin specific peptidase 39                                                                                                          | 1.05 | 1.90E-05 |
| 22256     | Ung           | uracil DNA glycosylase                                                                                                                   | 1.05 | 0.00026  |
| 66125     | Sf3b5         | splicing factor 3b, subunit 5                                                                                                            | 1.05 | 0.002    |
| 60406     | Sap30         | sin3 associated polypeptide                                                                                                              | 1.05 | 1.80E-05 |
| 20174     | Ruvbl2        | RuvB-like protein 2                                                                                                                      | 1.05 | 9.10E-06 |
| 19679     | Pitpnm2       | phosphatidylinositol transfer protein, membrane-associated 2                                                                             | 1.05 | 0.00015  |
| 66181     | Nop10         | NOP10 ribonucleoprotein homolog (yeast)                                                                                                  | 1.05 | 0.00051  |
| 68294     | Mfsd10        | major facilitator superfamily domain containing 10                                                                                       | 1.05 | 6.50E-05 |
| 66978     | Luc7l         | Luc7 homolog ( <i>S. cerevisiae</i> )-like                                                                                               | 1.05 | 8.20E-05 |
| 67978     | Tctn2         | tectonic family member 2                                                                                                                 | 1.05 | 0.00041  |
| 100047009 | ILMN_210896   | PREDICTED: Mus musculus hypothetical protein LOC100047009 (LOC100047009), misc RNA.                                                      | 1.05 | 0.0012   |
| 105148    | Iars          | isoleucine-tRNA synthetase                                                                                                               | 1.05 | 5.30E-05 |
| 18605     | Enpp1         | ectonucleotide pyrophosphatase/phosphodiesterase 1                                                                                       | 1.05 | 9.30E-05 |
| 27221     | Chaf1a        | chromatin assembly factor 1, subunit A (p150)                                                                                            | 1.05 | 4.40E-06 |
| 102920    | Cenpi         | centromere protein 1                                                                                                                     | 1.05 | 0.0014   |
| 12466     | ILMN_224361   | Mus musculus chaperonin containing Tcp1, subunit 6a (zeta) (Cct6a), mRNA.                                                                | 1.05 | 1.90E-06 |
| 17060     | Blnk          | B-cell linker                                                                                                                            | 1.05 | 8.70E-05 |
| 230917    | Tmem201       | transmembrane protein 201                                                                                                                | 1.05 | 7.00E-04 |
| 11677     | ILMN_191705   | Mus musculus aldo-keto reductase family 1, member B3 (aldose reductase) (Akr1b3), mRNA.                                                  | 1.05 | 3.90E-05 |
| 330173    | ILMN_215581   | Mus musculus RIKEN cDNA 2610524H06 gene (2610524H06Rik), mRNA.                                                                           | 1.05 | 2.60E-05 |
| 73710     | Tubb2b        | tubulin, beta 2B                                                                                                                         | 1.04 | 1.50E-05 |
| 22051     | Trip6         | thyroid hormone receptor interactor 6                                                                                                    | 1.04 | 0.012    |
| 68539     | Tmem109       | transmembrane protein 109                                                                                                                | 1.04 | 1.60E-06 |
| 106957    | Slc39a6       | solute carrier family 39 (metal ion transporter), member 6                                                                               | 1.04 | 4.60E-06 |
| 67390     | Rnm1l         | RNA methyltransferase like 1                                                                                                             | 1.04 | 0.00013  |
| 56361     | Pus1          | pseudouridine synthase 1                                                                                                                 | 1.04 | 1.60E-05 |
| 67203     | Nde1          | nuclear distribution gene E homolog 1 ( <i>A. nidulans</i> )                                                                             | 1.04 | 8.70E-05 |
| 67219     | ILMN_208709   | Mus musculus mediator of RNA polymerase II transcription, subunit 18 homolog (yeast) (Med18), mRNA.                                      | 1.04 | 2.70E-06 |
| 17192     | Mbd3          | methyl-CpG binding domain protein 3                                                                                                      | 1.04 | 1.00E-04 |
| 99010     | Lpcat4        | lysophosphatidylcholine acyltransferase 4                                                                                                | 1.04 | 0.0016   |
| 16211     | Kpnb1         | karyopherin (importin) beta 1                                                                                                            | 1.04 | 6.30E-05 |
| 16525     | Kcnk1         | potassium channel, subfamily K, member 1                                                                                                 | 1.04 | 1.50E-07 |
| 320299    | Iqcb1         | IQ calmodulin-binding motif containing 1                                                                                                 | 1.04 | 1.10E-05 |
| 114663    | Impa2         | inositol (myo)-1(or 4)-monophosphatase 2                                                                                                 | 1.04 | 6.50E-06 |
| 269252    | Gtf3c4        | general transcription factor IIIC, polypeptide 4                                                                                         | 1.04 | 4.10E-06 |
| 223666    | Arhgap39      | Rho GTPase activating protein 39                                                                                                         | 1.04 | 2.00E-04 |
| 71963     | Cdca4         | cell division cycle associated 4                                                                                                         | 1.04 | 1.70E-05 |
| 75565     | ILMN_215478   | Mus musculus coiled-coil domain containing 101 (Ccdc101), mRNA.                                                                          | 1.04 | 0.00018  |
| 56412     | 2610024G14Rik | RIKEN cDNA 2610024G14 gene                                                                                                               | 1.04 | 3.30E-05 |
| 230917    | Tmem201       | transmembrane protein 201                                                                                                                | 1.03 | 1.80E-05 |
| 21454     | Tcp1          | t-complex protein 1                                                                                                                      | 1.03 | 0.0027   |
| 226830    | Smyd2         | SET and MYND domain containing 2                                                                                                         | 1.03 | 0.00028  |
| 116914    | Slc19a2       | solute carrier family 19 (thiamine transporter), member 2                                                                                | 1.03 | 0.0031   |
| 66083     | Setd6         | SET domain containing 6                                                                                                                  | 1.03 | 7.10E-05 |
| 78895     | Pus7l         | pseudouridylyl synthase 7 homolog ( <i>S. cerevisiae</i> )-like                                                                          | 1.03 | 1.70E-05 |
| 107939    | Pom12l        | nuclear pore membrane protein 12l                                                                                                        | 1.03 | 0.00029  |
| 108083    | Pip4k2b       | phosphatidylinositol-5-phosphate 4-kinase, type II, beta                                                                                 | 1.03 | 8.70E-06 |
| 56698     | Phax          | phosphorylated adaptor for RNA export                                                                                                    | 1.03 | 0.0023   |
| 17688     | Msh6          | mutS homolog 6 ( <i>E. coli</i> )                                                                                                        | 1.03 | 9.10E-06 |
| 72050     | Kdelc1        | KDEL (Lys-Asp-Glu-Leu) containing 1                                                                                                      | 1.03 | 2.70E-05 |
| 27998     | Exosc5        | exosome component 5                                                                                                                      | 1.03 | 3.40E-05 |
| 12729     | Chns1a        | chloride channel, nucleotide-sensitive, 1A                                                                                               | 1.03 | 0.00018  |

|             |               |                                                                                                     |       |          |
|-------------|---------------|-----------------------------------------------------------------------------------------------------|-------|----------|
| 214901      | Chtf18        | CTF18, chromosome transmission fidelity factor 18 homolog (S. cerevisiae)                           | 1.03  | 4.90E-05 |
| 12400       | Cbfb          | core binding factor beta                                                                            | 1.03  | 5.10E-05 |
| 12033       | Bcap29        | B-cell receptor-associated protein 29                                                               | 1.03  | 0.00021  |
| 328099      | ILMN_241519   | Mus musculus expressed sequence AU021838 (AU021838), mRNA.                                          | 1.03  | 6.60E-06 |
| 27053       | Asns          | asparagine synthetase                                                                               | 1.03  | 7.00E-04 |
| 57315       | Wdr46         | WD repeat domain 46                                                                                 | 1.02  | 3.00E-04 |
| 28035       | Usp39         | ubiquitin specific peptidase 39                                                                     | 1.02  | 0.00015  |
| 50995       | Uba2          | ubiquitin-like modifier activating enzyme 2                                                         | 1.02  | 3.00E-05 |
| 22143       | Tuba1b        | tubulin, alpha 1B                                                                                   | 1.02  | 7.30E-05 |
| 69071       | Tmem97        | transmembrane protein 97                                                                            | 1.02  | 0.00015  |
| 20901       | Strap         | serine/threonine kinase receptor associated protein                                                 | 1.02  | 3.10E-05 |
| 26570       | Slc7a11       | solute carrier family 7 (cationic amino acid transporter, y+ system), member 11                     | 1.02  | 0.024    |
| 76560       | Prss8         | protease, serine, 8 (prostatic)                                                                     | 1.02  | 0.0013   |
| 69241       | ILMN_212219   | Mus musculus polymerase (RNA) II (DNA directed) polypeptide D (Polr2d), transcript variant 2, mRNA. | 1.02  | 1.40E-05 |
| 66249       | Pno1          | partner of NOB1 homolog (S. cerevisiae)                                                             | 1.02  | 0.00011  |
| 18769       | Pkig          | protein kinase inhibitor, gamma                                                                     | 1.02  | 0.00065  |
| 13619       | Pbc1          | polyhomeotic-like 1 (Drosophila)                                                                    | 1.02  | 0.00011  |
| 212503      | ILMN_212962   | Mus musculus polyamine oxidase (exo-N4-amino) (Paox), mRNA.                                         | 1.02  | 1.10E-05 |
| 170762      | ILMN_196165   | Mus musculus nucleoporin 155 (Nup155), mRNA.                                                        | 1.02  | 3.60E-06 |
| 241275      | Noxa1         | NADPH oxidase activator 1                                                                           | 1.02  | 0.0049   |
| 50529       | Mtps7         | mitochondrial ribosomal protein S7                                                                  | 1.02  | 9.60E-08 |
| 17279       | Melk          | maternal embryonic leucine zipper kinase                                                            | 1.02  | 1.50E-05 |
| 73804       | Kif2c         | kinesin family member 2C                                                                            | 1.02  | 0.0016   |
| 67781       | Ilf2          | interleukin enhancer binding factor 2                                                               | 1.02  | 5.60E-06 |
| 15331       | ILMN_213625   | Mus musculus high mobility group nucleosomal binding domain 2 (Hmg2), mRNA.                         | 1.02  | 8.70E-06 |
| 51886       | Fubp1         | far upstream element (FUSE) binding protein 1                                                       | 1.02  | 7.00E-05 |
| 101358      | Fbxl14        | F-box and leucine-rich repeat protein 14                                                            | 1.02  | 1.10E-06 |
| 23874       | Farsb         | phenylalanyl-tRNA synthetase, beta subunit                                                          | 1.02  | 8.20E-07 |
| 19347       | ILMN_213254   | Mus musculus DENN/MADD domain containing 5A (Dennd5a), mRNA.                                        | 1.02  | 4.30E-05 |
| 76863       | Dcun1d5       | DCN1, defective in cullin neddylation 1, domain containing 5 (S. cerevisiae)                        | 1.02  | 2.70E-05 |
| 235386      | ILMN_259576   | Mus musculus RIKEN cDNA C630028N24 gene (C630028N24Rik), mRNA.                                      | 1.02  | 0.0024   |
| 100710      | Pds5b         | PDS5, regulator of cohesion maintenance, homolog B (S. cerevisiae)                                  | 1.02  | 5.40E-07 |
| 208624      | Alg3          | asparagine-linked glycosylation 3 homolog (yeast, alpha-1,3-mannosyltransferase)                    | 1.02  | 0.00019  |
| 67371       | ILMN_209771   | Mus musculus RIKEN cDNA 2410016F19 gene (2410016F19Rik), mRNA.                                      | 1.02  | 0.00096  |
| 22171       | Tyms          | thymidylate synthase                                                                                | 1.01  | 9.00E-05 |
| 21781       | Tfdp1         | transcription factor Dp 1                                                                           | 1.01  | 4.60E-05 |
| 217031      | Tada2a        | transcriptional adaptor 2A                                                                          | 1.01  | 4.80E-05 |
| 170460      | Stard5        | STAR-related lipid transfer (START) domain containing 5                                             | 1.01  | 0.00026  |
| 84505       | Setdb1        | SET domain, bifurcated 1                                                                            | 1.01  | 3.80E-05 |
| ILMN_187520 |               |                                                                                                     | 1.01  | 0.0013   |
| 20103       | Rps5          | ribosomal protein S5                                                                                | 1.01  | 0.0024   |
| 27176       | ILMN_234979   | Mus musculus ribosomal protein L7a (Rpl7a), mRNA.                                                   | 1.01  | 0.0012   |
| 72486       | Rnf219        | ring finger protein 219                                                                             | 1.01  | 4.30E-05 |
| 56452       | Orc6          | origin recognition complex, subunit 6                                                               | 1.01  | 5.00E-06 |
| 68043       | N6amt2        | N-6 adenine-specific DNA methyltransferase 2 (putative)                                             | 1.01  | 0.00017  |
| 68114       | Mum1          | melanoma associated antigen (mutated) 1                                                             | 1.01  | 4.60E-05 |
| 546015      | ILMN_213995   | PREDICTED: Mus musculus similar to ribosomal protein S9 (LOC546015), misc RNA.                      | 1.01  | 0.00014  |
| 27993       | Imp4          | IMP4, U3 small nucleolar ribonucleoprotein, homolog (yeast)                                         | 1.01  | 1.00E-05 |
| 14853       | Gsp2          | G1 to S phase transition 2                                                                          | 1.01  | 7.70E-05 |
| 66120       | Fkbp11        | FK506 binding protein 11                                                                            | 1.01  | 0.0024   |
| 276770      | Eif5a         | eukaryotic translation initiation factor 5A                                                         | 1.01  | 3.20E-05 |
| 67160       | Eef1g         | eukaryotic translation elongation factor 1 gamma                                                    | 1.01  | 5.70E-07 |
| 72831       | Dhx30         | DEAH (Asp-Glu-Ala-His) box polypeptide 30                                                           | 1.01  | 2.30E-05 |
| 14793       | Cdca3         | cell division cycle associated 3                                                                    | 1.01  | 5.00E-04 |
| 71492       | Bbs7          | Bardet-Biedl syndrome 7 (human)                                                                     | 1.01  | 2.10E-05 |
| 23825       | Banf1         | barrier to autointegration factor 1                                                                 | 1.01  | 0.00027  |
| 11745       | ILMN_221274   | Mus musculus annexin A3 (Anxa3), mRNA.                                                              | 1.01  | 0.015    |
| 381903      | Alg8          | asparagine-linked glycosylation 8 homolog (yeast, alpha-1,3-glucosyltransferase)                    | 1.01  | 0.00056  |
| 223921      | Aaas          | achalasia, adrenocortical insufficiency, alacrimia                                                  | 1.01  | 0.00027  |
| 237880      | 1700071K01Rik | RIKEN cDNA 1700071K01 gene                                                                          | 1.01  | 0.00051  |
| 240675      | Vwa2          | von Willebrand factor A domain containing 2                                                         | 1     | 0.00015  |
| 22247       | Umps          | uridine monophosphate synthetase                                                                    | 1     | 0.00042  |
| 56085       | Ubqln1        | ubiquilin 1                                                                                         | 1     | 8.70E-06 |
| 22051       | Tripp6        | thyroid hormone receptor interactor 6                                                               | 1     | 0.001    |
| 21973       | Top2a         | topoisomerase (DNA) II alpha                                                                        | 1     | 0.002    |
| 19240       | ILMN_243396   | Mus musculus thymosin, beta 10 (Tmsb10), mRNA.                                                      | 1     | 0.00053  |
| 66628       | Thg1l         | tRNA-histidine guanylyltransferase 1-like (S. cerevisiae)                                           | 1     | 0.00022  |
| 53416       | Stk39         | serine/threonine kinase 39, STE20/SPS1 homolog (yeast)                                              | 1     | 2.70E-05 |
| 53607       | Snrpa         | small nuclear ribonucleoprotein polypeptide A                                                       | 1     | 1.40E-06 |
| 74777       | Sepn1         | selenoprotein N, 1                                                                                  | 1     | 9.00E-05 |
| 54364       | Rpp30         | ribonuclease P/MPR 30 subunit (human)                                                               | 1     | 8.70E-05 |
| 19707       | Reps1         | RalBP1 associated Eps domain containing protein                                                     | 1     | 4.10E-06 |
| 75292       | Prkd3         | protein kinase D3                                                                                   | 1     | 1.90E-05 |
| 18618       | Pemt          | phosphatidylethanolamine N-methyltransferase                                                        | 1     | 6.60E-05 |
| 56488       | Nxt1          | NTF2-related export protein 1                                                                       | 1     | 1.30E-05 |
| 68611       | Mpl28         | mitochondrial ribosomal protein L28                                                                 | 1     | 3.00E-05 |
| 67903       | Gipc1         | GIPC PDZ domain containing family, member 1                                                         | 1     | 0.00029  |
| 319710      | Frdm6         | FERM domain containing 6                                                                            | 1     | 0.00025  |
| 14252       | Flot2         | flotillin 2                                                                                         | 1     | 9.10E-05 |
| 23873       | Faim          | Fas apoptotic inhibitory molecule                                                                   | 1     | 0.00091  |
| 227715      | Exosc2        | exosome component 2                                                                                 | 1     | 1.00E-05 |
| 227715      | Exosc2        | exosome component 2                                                                                 | 1     | 0.00027  |
| 67728       | Dph2          | DPH2 homolog (S. cerevisiae)                                                                        | 1     | 2.70E-07 |
| 225995      | D030056L22Rik | RIKEN cDNA D030056L22 gene                                                                          | 1     | 0.00013  |
| 108912      | Cdca2         | cell division cycle associated 2                                                                    | 1     | 7.30E-05 |
| 54219       | Cd320         | CD320 antigen                                                                                       | 1     | 0.0022   |
| 12181       | Bop1          | block of proliferation 1                                                                            | 1     | 0.00047  |
| 239368      | ILMN_209600   | Mus musculus cDNA sequence BC030476 (BC030476), mRNA.                                               | 1     | 0.017    |
| 208624      | Alg3          | asparagine-linked glycosylation 3 homolog (yeast, alpha-1,3-mannosyltransferase)                    | 1     | 6.60E-06 |
| 66422       | Dctpp1        | dCTP pyrophosphatase 1                                                                              | 1     | 4.00E-04 |
| 22320       | Vamp8         | vesicle-associated membrane protein 8                                                               | -1    | 4.60E-06 |
| 67473       | Slc47a1       | solute carrier family 47, member 1                                                                  | -1    | 1.10E-05 |
| 81910       | Rrbp1         | ribosome binding protein 1                                                                          | -1    | 0.0037   |
| 224938      | Pja2          | praja 2, RING-H2 motif containing                                                                   | -1    | 7.10E-05 |
| 52793       | Fam3b         | family with sequence similarity 3, member B                                                         | -1    | 0.0025   |
| 109305      | Orai1         | ORAI calcium release-activated calcium modulator 1                                                  | -1    | 0.00015  |
| 14792       | ILMN_210660   | Mus musculus lysophosphatidylcholine acyltransferase 3 (Lpcat3), mRNA.                              | -1    | 0.00025  |
| 381924      | Itgad         | integrin, alpha D                                                                                   | -1    | 0.006    |
| 14674       | Gna13         | guanine nucleotide binding protein, alpha 13                                                        | -1    | 0.0045   |
| 74256       | Cyld          | cylindromatosis (turban tumor syndrome)                                                             | -1    | 0.00086  |
| 54151       | Cyhr1         | cysteine and histidine rich 1                                                                       | -1    | 2.70E-05 |
| 12653       | Chgb          | chromogranin B                                                                                      | -1    | 8.70E-05 |
| 218294      | Cdc14b        | CDC14 cell division cycle 14 homolog B (S. cerevisiae)                                              | -1    | 0.00029  |
| 12153       | Bmp1          | bone morphogenetic protein 1                                                                        | -1    | 7.20E-06 |
| 12010       | B2m           | beta-2-microglobulin                                                                                | -1    | 0.0021   |
| 11370       | Acadv1        | acyl-Coenzyme A dehydrogenase, very long chain                                                      | -1    | 0.00052  |
| 76408       | Abcc3         | ATP-binding cassette, sub-family C (CFTR/MRP), member 3                                             | -1    | 0.00021  |
| 71774       | Shroom1       | shroom family member 1                                                                              | -1    | 0.0011   |
| 22217       | Usp12         | ubiquitin specific peptidase 12                                                                     | -1.01 | 1.90E-05 |
| 381058      | ILMN_190827   | Mus musculus unc-93 homolog A (C. elegans) (Unc93a), mRNA.                                          | -1.01 | 0.0021   |
| 66664       | Tmem41a       | transmembrane protein 41a                                                                           | -1.01 | 9.40E-05 |
| 26944       | Tinag         | tubulointerstitial nephritis antigen                                                                | -1.01 | 0.00017  |
| 98267       | Stk17b        | serine/threonine kinase 17b (apoptosis-inducing)                                                    | -1.01 | 0.0012   |
| 20849       | Stat4         | signal transducer and activator of transcription 4                                                  | -1.01 | 0.0017   |
| 67474       | Snap29        | synaptosomal-associated protein 29                                                                  | -1.01 | 7.80E-06 |
| 19334       | Rab22a        | RAB22A, member RAS oncogene family                                                                  | -1.01 | 0.00091  |
| 18631       | Pex11a        | peroxisomal biogenesis factor 11 alpha                                                              | -1.01 | 0.0022   |

|             |               |                                                                                                |       |          |
|-------------|---------------|------------------------------------------------------------------------------------------------|-------|----------|
| 17916       | Myo1f         | myosin IF                                                                                      | -1.01 | 7.70E-05 |
| 16890       | Lipe          | lipase, hormone sensitive                                                                      | -1.01 | 0.00055  |
| 16561       | Kif1b         | kinesin family member 1B                                                                       | -1.01 | 1.70E-08 |
| 16362       | Irf1          | interferon regulatory factor 1                                                                 | -1.01 | 0.0085   |
| 57890       | Il17re        | interleukin 17 receptor E                                                                      | -1.01 | 0.0024   |
| 56489       | Ikbke         | inhibitor of kappaB kinase epsilon                                                             | -1.01 | 2.80E-05 |
| 68177       | Ebpl          | emopamil binding protein-like                                                                  | -1.01 | 0.00023  |
| 11475       | Acta2         | actin, alpha 2, smooth muscle, aorta                                                           | -1.01 | 0.0098   |
| 381560      | Xkr8          | X Kell blood group precursor related family member 8 homolog                                   | -1.02 | 1.00E-05 |
| 68667       | ILMN_195068   | Mus musculus transient receptor potential cation channel, subfamily M, member 4 (Trpm4), mRNA. | -1.02 | 0.00015  |
| 60455       | Tmem8         | transmembrane protein 8 (five membrane-spanning domains)                                       | -1.02 | 4.60E-05 |
| 209760      | Tmc7          | transmembrane channel-like gene family 7                                                       | -1.02 | 0.0021   |
| 67528       | Nudt7         | nudix (nucleoside diphosphate linked moiety X)-type motif 7                                    | -1.02 | 8.20E-06 |
| 259277      | Klk8          | kallikrein related-peptidase 8                                                                 | -1.02 | 0.00053  |
| 13716       | Ell           | elongation factor RNA polymerase II                                                            | -1.02 | 2.10E-06 |
| 260409      | Cdc42ep3      | CDC42 effector protein (Rho GTPase binding) 3                                                  | -1.02 | 0.0081   |
| 12516       | Cd7           | CD7 antigen                                                                                    | -1.02 | 0.0026   |
| 73102       | Slc22a23      | solute carrier family 22, member 23                                                            | -1.02 | 2.50E-06 |
| 16912       | Psmb9         | proteasome (prosome, macropain) subunit, beta type 9 (large multifunctional peptidase 2)       | -1.03 | 0.034    |
| 56428       | Mtch2         | mitochondrial carrier homolog 2 (C. elegans)                                                   | -1.03 | 5.90E-05 |
| 16561       | Kif1b         | kinesin family member 1B                                                                       | -1.03 | 9.30E-05 |
| 216136      | Ilvbl         | ilvB (bacterial acetolactate synthase)-like                                                    | -1.03 | 0.00032  |
| 66847       | Hint3         | histidine triad nucleotide binding protein 3                                                   | -1.03 | 6.70E-06 |
| 14042       | Ext1          | exostosins (multiple) 1                                                                        | -1.03 | 0.00026  |
| 53310       | Dlg3          | discs, large homolog 3 (Drosophila)                                                            | -1.03 | 1.20E-05 |
| 12511       | Cd6           | CD6 antigen                                                                                    | -1.03 | 0.00091  |
| 11671       | ILMN_251976   | Mus musculus aldehyde dehydrogenase family 3, subfamily A2 (Aldh3a2), mRNA.                    | -1.03 | 2.50E-06 |
| 269997      | Zfp747        | zinc finger protein 747                                                                        | -1.04 | 0.00034  |
| 22337       | Vdr           | vitamin D receptor                                                                             | -1.04 | 0.00062  |
| 70599       | Ssfa2         | sperm specific antigen 2                                                                       | -1.04 | 0.0018   |
| 217430      | Pqle3         | PQ loop repeat containing                                                                      | -1.04 | 9.40E-05 |
| 16362       | Irf1          | interferon regulatory factor 1                                                                 | -1.04 | 0.0021   |
| 277463      | Gpr107        | G protein-coupled receptor 107                                                                 | -1.04 | 5.70E-07 |
| 12359       | ILMN_254459   | Mus musculus catalase (Cat), mRNA.                                                             | -1.04 | 7.40E-05 |
| 26363       | Btd           | biotinidase                                                                                    | -1.04 | 1.00E-05 |
| 66090       | Ypel3         | yippes-like 3 (Drosophila)                                                                     | -1.05 | 0.00034  |
| 233405      | Vps33b        | vacuolar protein sorting 33B (yeast)                                                           | -1.05 | 0.00013  |
| 235135      | Tmem45b       | transmembrane protein 45b                                                                      | -1.05 | 4.70E-06 |
| 21787       | Ttg           | Trk-fused gene                                                                                 | -1.05 | 6.20E-08 |
| 263876      | Spat2         | spermatogenesis associated 2                                                                   | -1.05 | 1.50E-05 |
| 107723      | Slc12a6       | solute carrier family 12, member 6                                                             | -1.05 | 2.10E-05 |
| 12258       | Serpin1       | serine (or cysteine) peptidase inhibitor, clade G, member 1                                    | -1.05 | 0.01     |
| 101476      | Plekha1       | pleckstrin homology domain containing, family A (phosphoinositide binding specific) member 1   | -1.05 | 1.30E-05 |
| 18633       | Pex16         | peroxisomal biogenesis factor 16                                                               | -1.05 | 8.50E-07 |
| 23959       | Nt5e          | 5' nucleotidase, ecto                                                                          | -1.05 | 0.0081   |
| 17130       | Smaad6        | MAD homolog 6 (Drosophila)                                                                     | -1.05 | 1.60E-05 |
| 114255      | Dok4          | docking protein 4                                                                              | -1.05 | 0.014    |
| 109672      | Cyb5          | cytochrome b-5                                                                                 | -1.05 | 7.10E-05 |
| 68631       | Cry1l         | crystallin, lambda 1                                                                           | -1.05 | 3.80E-07 |
| 12575       | ILMN_209664   | Mus musculus cyclin-dependent kinase inhibitor 1A (P21) (Cdkn1a), mRNA.                        | -1.05 | 0.00034  |
| 74018       | Als2          | amyotrophic lateral sclerosis 2 (juvenile) homolog (human)                                     | -1.05 | 9.70E-06 |
| 69596       | 2310035K24Rik | RIKEN cDNA 2310035K24 gene                                                                     | -1.05 | 6.00E-05 |
| 22376       | Was           | Wiskott-Aldrich syndrome homolog (human)                                                       | -1.06 | 6.40E-05 |
| 227659      | Slc2a6        | solute carrier family 2 (facilitated glucose transporter), member 6                            | -1.06 | 0.0034   |
| 215474      | Sec22c        | SEC22 vesicle trafficking protein homolog C (S. cerevisiae)                                    | -1.06 | 3.80E-05 |
| 56367       | Scoc          | short coiled-coil protein                                                                      | -1.06 | 2.50E-05 |
| 78388       | Mvp           | major vault protein                                                                            | -1.06 | 5.30E-06 |
| 16452       | Jak2          | Janus kinase 2                                                                                 | -1.06 | 0.00013  |
| 140579      | Elmo2         | engulfment and cell motility 2, ced-12 homolog (C. elegans)                                    | -1.06 | 0.00027  |
| 83429       | Ctns          | cystinosis, nephropathic                                                                       | -1.06 | 0.00047  |
| 12833       | Col6a1        | collagen, type VI, alpha 1                                                                     | -1.06 | 0.01     |
| 213649      | Arhgef19      | Rho guanine nucleotide exchange factor (GEF) 19                                                | -1.06 | 0.00011  |
| 216991      | Adap2         | ArrGAP with dual PH domains 2                                                                  | -1.06 | 8.70E-06 |
| 11461       | Actb          | actin, beta                                                                                    | -1.06 | 7.00E-04 |
| 11364       | Acadm         | acyl-Coenzyme A dehydrogenase, medium chain                                                    | -1.06 | 3.70E-07 |
| 24001       | Tiam2         | T-cell lymphoma invasion and metastasis 2                                                      | -1.07 | 7.00E-04 |
| 21355       | ILMN_217715   | Mus musculus transporter 2, ATP-binding cassette, sub-family B (MDR/TAP) (Tap2), mRNA.         | -1.07 | 0.018    |
| 70510       | Rnf167        | ring finger protein 167                                                                        | -1.07 | 1.40E-05 |
| 110095      | Pygl          | liver glycogen phosphorylase                                                                   | -1.07 | 0.00032  |
| 78004       | ILMN_214576   | Mus musculus proline rich 15 (Prr15), mRNA.                                                    | -1.07 | 0.00075  |
| 17940       | Naip1         | NLR family, apoptosis inhibitory protein 1                                                     | -1.07 | 0.0012   |
| 194126      | Mttr1         | myotubularin related protein 11                                                                | -1.07 | 7.70E-05 |
| 56428       | Mtch2         | mitochondrial carrier homolog 2 (C. elegans)                                                   | -1.07 | 3.20E-06 |
| 266632      | ILMN_216529   | Mus musculus interleukin-1 receptor-associated kinase 4 (Irak4), mRNA.                         | -1.07 | 4.00E-05 |
| 12499       | Entpd5        | ectonucleoside triphosphate diphosphohydrolase 5                                               | -1.07 | 7.60E-06 |
| 243881      | Cyp2b23       | cytochrome P450, family 2, subfamily b, polypeptide 23                                         | -1.07 | 0.0026   |
| 109754      | Cyb5r3        | cytochrome b5 reductase 3                                                                      | -1.07 | 7.80E-05 |
| 12515       | Cd69          | CD69 antigen                                                                                   | -1.07 | 0.0013   |
| ILMN_223067 |               |                                                                                                | -1.07 | 3.80E-06 |
| 244882      | Tnfaip8l3     | tumor necrosis factor, alpha-induced protein 8-like 3                                          | -1.08 | 0.00012  |
| 67043       | Syap1         | synapse associated protein 1                                                                   | -1.08 | 1.70E-05 |
| 56632       | ILMN_218883   | Mus musculus sphingosine kinase 2 (Sphk2), transcript variant 2, mRNA.                         | -1.08 | 2.90E-05 |
| 20715       | Serpina3g     | serine (or cysteine) peptidase inhibitor, clade A, member 3G                                   | -1.08 | 0.0014   |
| 72112       | Ppp1r14d      | protein phosphatase 1, regulatory (inhibitor) subunit 14D                                      | -1.08 | 1.60E-06 |
| 102693      | Pldbl1        | pleckstrin homology-like domain, family B, member 1                                            | -1.08 | 0.0018   |
| 68671       | Pcyt2         | phosphate cytidylyltransferase 2, ethanolamine                                                 | -1.08 | 8.90E-07 |
| 107587      | Osr2          | odd-skipped related 2 (Drosophila)                                                             | -1.08 | 0.015    |
| 18105       | Nqo2          | NAD(P)H dehydrogenase, quinone 2                                                               | -1.08 | 3.90E-06 |
| 269593      | Luzp1         | leucine zipper protein 1                                                                       | -1.08 | 0.00032  |
| 15040       | ILMN_196750   | Mus musculus histocompatibility 2, T region locus 23 (H2-T23), mRNA.                           | -1.08 | 0.016    |
| 14281       | Fos           | FBJ osteosarcoma oncogene                                                                      | -1.08 | 0.00065  |
| 218294      | ILMN_251331   | Mus musculus CDC14 cell division cycle 14 homolog B (S. cerevisiae) (Cdc14b), mRNA.            | -1.08 | 0.00011  |
| 226777      | C130074G19Rik | RIKEN cDNA C130074G19 gene                                                                     | -1.08 | 0.00013  |
| 74442       | Sgms2         | sphingomyelin synthase 2                                                                       | -1.09 | 2.10E-05 |
| 19698       | Relb          | avian reticuloendotheliosis viral (v-rel) oncogene related B                                   | -1.09 | 6.40E-05 |
| 67245       | Peli1         | pellino 1                                                                                      | -1.09 | 4.40E-05 |
| 360013      | Myo18a        | myosin XVIIIa                                                                                  | -1.09 | 0.00032  |
| 64898       | Lpin2         | lipin 2                                                                                        | -1.09 | 0.00047  |
| 214854      | Neur13        | neuritized homolog 3 homolog (Drosophila)                                                      | -1.09 | 0.00013  |
| 16477       | Junb          | Jun-B oncogene                                                                                 | -1.09 | 1.00E-05 |
| 77125       | Il33          | interleukin 33                                                                                 | -1.09 | 0.003    |
| 13175       | Delk1         | doublecortin-like kinase 1                                                                     | -1.09 | 0.00026  |
| 211535      | Cdc114        | coiled-coil domain containing 114                                                              | -1.09 | 2.60E-05 |
| 223642      | Zc3h3         | zinc finger CCCH type containing 3                                                             | -1.1  | 3.80E-07 |
| 22337       | Vdr           | vitamin D receptor                                                                             | -1.1  | 2.60E-05 |
| 72094       | Ugt2a3        | UDP glucuronosyltransferase 2 family, polypeptide A3                                           | -1.1  | 1.20E-05 |
| 17919       | Myo5b         | myosin VB                                                                                      | -1.1  | 0.00081  |
| 243374      | Gimap8        | GTPase, IMAP family member 8                                                                   | -1.1  | 0.00081  |
| 72972       | Gcap14        | granule cell antiserum positive 14                                                             | -1.1  | 4.70E-06 |
| 231717      | ILMN_193500   | Mus musculus family with sequence similarity 109, member A (Fam109a), mRNA.                    | -1.1  | 0.00057  |
| 630499      | ILMN_244752   | Mus musculus predicted gene, EG630499 (EG630499), mRNA.                                        | -1.1  | 0.0021   |
| 27883       | D16H22S680E   | DNA segment, Chr 16, human D22S680E, expressed                                                 | -1.1  | 1.20E-07 |
| 72747       | Ttc39c        | tetratricopeptide repeat domain 39C                                                            | -1.1  | 5.40E-05 |
| 625286      | Fam23a        | family with sequence similarity 23, member A                                                   | -1.1  | 2.70E-06 |
| 68520       | Zfyve21       | zinc finger, FYVE domain containing 21                                                         | -1.11 | 5.70E-07 |
| 27371       | Sh2d2a        | SH2 domain protein 2A                                                                          | -1.11 | 0.0081   |
| 20181       | ILMN_221874   | Mus musculus retinoid X receptor alpha (Rxra), mRNA.                                           | -1.11 | 2.00E-04 |

|           |               |                                                                                                                                        |       |          |
|-----------|---------------|----------------------------------------------------------------------------------------------------------------------------------------|-------|----------|
| 19268     | Ppfrf         | protein tyrosine phosphatase, receptor type, F                                                                                         | -1.11 | 3.90E-06 |
| 76787     | Ppfia3        | protein tyrosine phosphatase, receptor type, f polypeptide (PTPRF), interacting protein (liprin), alpha 3                              | -1.11 | 0.0013   |
| 171580    | Mical1        | microtubule associated monooxygenase, calponin and LIM domain containing 1                                                             | -1.11 | 0.0039   |
| 232431    | ILMN_239682   | Mus musculus G protein-coupled receptor, family C, group 5, member A (Gprc5a), mRNA.                                                   | -1.11 | 0.011    |
| 12499     | Entpd5        | ectonucleoside triphosphate diphosphohydrolase 5                                                                                       | -1.11 | 1.90E-06 |
| 12833     | Col6a1        | collagen, type VI, alpha 1                                                                                                             | -1.11 | 0.049    |
| 12651     | ILMN_212086   | Mus musculus choline kinase beta (Chkb), mRNA.                                                                                         | -1.11 | 1.60E-06 |
| 12362     | ILMN_211039   | Mus musculus caspase 1 (Casp1), mRNA.                                                                                                  | -1.11 | 0.00038  |
| 74156     | ILMN_220246   | Mus musculus acyl-CoA thioesterase 12 (Acot12), mRNA.                                                                                  | -1.11 | 0.00096  |
| 66938     | 1700029G01Rik | RIKEN cDNA 1700029G01 gene                                                                                                             | -1.11 | 2.00E-04 |
| 67226     | Tmem19        | transmembrane protein 19                                                                                                               | -1.12 | 0.00035  |
| 71699     | Slc41a3       | solute carrier family 41, member 3                                                                                                     | -1.12 | 0.00091  |
| 67712     | Slc25a37      | solute carrier family 25, member 37                                                                                                    | -1.12 | 2.70E-05 |
| 224024    | Scarf2        | scavenger receptor class F, member 2                                                                                                   | -1.12 | 0.00017  |
| 67991     | Nacc2         | nucleus accumbens associated 2, BEN and BTB (POZ) domain containing                                                                    | -1.12 | 8.80E-06 |
| 70337     | Iyd           | iodotyrosine deiodinase                                                                                                                | -1.12 | 3.20E-05 |
| 70110     | Ii35          | interferon-induced protein 35                                                                                                          | -1.12 | 3.20E-05 |
| 15488     | Hsd17b4       | hydroxysteroid (17-beta) dehydrogenase 4                                                                                               | -1.12 | 1.40E-06 |
| 330914    | Arhgap32      | Rho GTPase activating protein 32                                                                                                       | -1.12 | 0.00017  |
| 14600     | Ghr           | growth hormone receptor                                                                                                                | -1.12 | 0.0016   |
| 13047     | Cux1          | cut-like homeobox 1                                                                                                                    | -1.12 | 0.00014  |
| 223754    | Tbc1d22a      | TBC1 domain family, member 22a                                                                                                         | -1.13 | 4.00E-07 |
| 22782     | Slc30a1       | solute carrier family 30 (zinc transporter), member 1                                                                                  | -1.13 | 0.00032  |
| 16889     | Lipa          | lysosomal acid lipase A                                                                                                                | -1.13 | 7.90E-05 |
| 16664     | Krt14         | keratin 14                                                                                                                             | -1.13 | 0.01     |
| 71597     | Isx           | intestine specific homeobox                                                                                                            | -1.13 | 0.00035  |
| 109754    | Cyb5f3        | cytochrome b5 reductase 3                                                                                                              | -1.13 | 1.40E-07 |
| 21940     | Cd27          | CD27 antigen                                                                                                                           | -1.13 | 0.00032  |
| 66259     | Camk2n1       | calcium/calmodulin-dependent protein kinase II inhibitor 1                                                                             | -1.13 | 1.70E-05 |
| 269423    | 3110057O12Rik | RIKEN cDNA 3110057O12 gene                                                                                                             | -1.13 | 2.10E-05 |
| 69064     | 1810014F10Rik | RIKEN cDNA 1810014F10 gene                                                                                                             | -1.13 | 6.10E-05 |
| 227620    | Uap1l1        | UDP-N-acetylglucosamine pyrophosphorylase 1-like 1                                                                                     | -1.14 | 5.30E-05 |
| 77975     | Tmem50b       | transmembrane protein 50B                                                                                                              | -1.14 | 0.0011   |
| 17063     | Muc13         | mucin 13, epithelial transmembrane                                                                                                     | -1.14 | 0.004    |
| 100045403 | ILMN_221330   | PREDICTED: Mus musculus similar to orthologue of H. sapiens chromosome 21 open reading frame 102 (C20orf102) (LOC100045403), misc RNA. | -1.14 | 0.001    |
| 74096     | Hvcn1         | hydrogen voltage-gated channel 1                                                                                                       | -1.14 | 3.00E-04 |
| 71908     | Cldn23        | claudin 23                                                                                                                             | -1.14 | 1.50E-05 |
| 66433     | Chchd7        | coiled-coil-helix-coiled-coil-helix domain containing 7                                                                                | -1.14 | 0.00024  |
| 23827     | Bpnt1         | bisphosphate 3'-nucleotidase 1                                                                                                         | -1.14 | 2.50E-06 |
| 11975     | Atp6v0a1      | ATPase, H+ transporting, lysosomal V0 subunit A1                                                                                       | -1.14 | 6.00E-06 |
| 71704     | Arhgef3       | Rho guanine nucleotide exchange factor (GEF) 3                                                                                         | -1.14 | 5.30E-05 |
| 20910     | Stxbp1        | syntaxin binding protein 1                                                                                                             | -1.15 | 0.00035  |
| 70510     | Rnf167        | ring finger protein 167                                                                                                                | -1.15 | 7.60E-06 |
| 71801     | Plekhd2       | pleckstrin homology domain containing, family F (with FYVE domain) member 2                                                            | -1.15 | 0.0071   |
| 18631     | Pex11a        | peroxisomal biogenesis factor 11 alpha                                                                                                 | -1.15 | 0.00055  |
| 641240    | ILMN_210638   | PREDICTED: Mus musculus similar to MHC class II antigen beta chain (LOC641240), mRNA.                                                  | -1.15 | 0.042    |
| 16452     | Jak2          | Janus kinase 2                                                                                                                         | -1.15 | 0.00022  |
| 67603     | Dusp6         | dual specificity phosphatase 6                                                                                                         | -1.15 | 0.0021   |
| 27999     | Fam3c         | family with sequence similarity 3, member C                                                                                            | -1.15 | 5.70E-07 |
| 12511     | Cd6           | CD6 antigen                                                                                                                            | -1.15 | 0.0045   |
| 432442    | Akap7         | A kinase (PRKA) anchor protein 7                                                                                                       | -1.15 | 4.50E-07 |
| 109652    | Acy1          | aminoacylase 1                                                                                                                         | -1.15 | 1.60E-05 |
| 56791     | Ube2l6        | ubiquitin-conjugating enzyme E2L 6                                                                                                     | -1.16 | 0.0025   |
| 56786     | Tmem9b        | TMEM9 domain family, member B                                                                                                          | -1.16 | 2.70E-06 |
| 76281     | ILMN_189706   | Mus musculus Tax1 (human T-cell leukemia virus type I) binding protein 3 (Tax1bp3), mRNA.                                              | -1.16 | 3.20E-06 |
| 76650     | Srxn1         | sulfiredoxin 1 homolog (S. cerevisiae)                                                                                                 | -1.16 | 0.00032  |
| 72022     | ILMN_235723   | Mus musculus solute carrier family 35, member F2 (Slc35f2), mRNA.                                                                      | -1.16 | 0.00096  |
| 140742    | Sesn1         | sestrin 1                                                                                                                              | -1.16 | 2.70E-05 |
| 235442    | Rab8b         | RAB8B, member RAS oncogene family                                                                                                      | -1.16 | 0.0067   |
| 18762     | Prkcz         | protein kinase C, zeta                                                                                                                 | -1.16 | 2.10E-05 |
| 19012     | Ppap2a        | phosphatidic acid phosphatase type 2A                                                                                                  | -1.16 | 0.0041   |
| 68671     | Pcyt2         | phosphate cytidylyltransferase 2, ethanolamine                                                                                         | -1.16 | 0.00024  |
| 18126     | Nos2          | nitric oxide synthase 2, inducible                                                                                                     | -1.16 | 0.042    |
| 16971     | Lrp1          | low density lipoprotein receptor-related protein 1                                                                                     | -1.16 | 1.90E-05 |
| 239759    | Liph          | lipase, member H                                                                                                                       | -1.16 | 0.001    |
| 18048     | ILMN_199361   | Mus musculus kallikrein 1-related peptidase b4 (Kik1b4), mRNA.                                                                         | -1.16 | 8.90E-07 |
| 238377    | Gpr68         | G protein-coupled receptor 68                                                                                                          | -1.16 | 2.70E-06 |
| 14571     | Gpd2          | glycerol phosphate dehydrogenase 2, mitochondrial                                                                                      | -1.16 | 0.0012   |
| 66569     | Gdpd1         | glycerophosphodiester phosphodiesterase domain containing 1                                                                            | -1.16 | 9.00E-08 |
| 67064     | Chmp1b        | chromatin modifying protein 1B                                                                                                         | -1.16 | 8.20E-05 |
| 75909     | Tmem49        | transmembrane protein 49                                                                                                               | -1.17 | 0.0015   |
| 20648     | Snta1         | syntrophin, acidic 1                                                                                                                   | -1.17 | 4.40E-05 |
| 71699     | Slc41a3       | solute carrier family 41, member 3                                                                                                     | -1.17 | 0.0014   |
| 228875    | Slc35c2       | solute carrier family 35, member C2                                                                                                    | -1.17 | 6.50E-05 |
| 108705    | Pttg1ip       | pituitary tumor-transforming 1 interacting protein                                                                                     | -1.17 | 8.30E-06 |
| 18770     | Pklr          | pyruvate kinase liver and red blood cell                                                                                               | -1.17 | 3.00E-06 |
| 56421     | Pikp          | phosphofruktokinase, platelet                                                                                                          | -1.17 | 6.20E-05 |
| 214854    | Neur13        | neutralized homolog 3 homolog (Drosophila)                                                                                             | -1.17 | 3.40E-06 |
| 72748     | Hdh3          | haloacid dehalogenase-like hydrolase domain containing 3                                                                               | -1.17 | 0.00038  |
| 12363     | ILMN_213344   | Mus musculus caspase 4, apoptosis-related cysteine peptidase (Casp4), mRNA.                                                            | -1.17 | 0.017    |
| 23827     | Bpnt1         | bisphosphate 3'-nucleotidase 1                                                                                                         | -1.17 | 0.00035  |
| 12010     | B2m           | beta-2-microglobulin                                                                                                                   | -1.17 | 0.0032   |
| 71687     | Tmem25        | transmembrane protein 25                                                                                                               | -1.18 | 0.00011  |
| 67043     | Syap1         | synapse associated protein 1                                                                                                           | -1.18 | 2.80E-05 |
| 20732     | Spint1        | serine protease inhibitor, Kunitz type 1                                                                                               | -1.18 | 0.00051  |
| 18408     | Slc25a15      | solute carrier family 25 (mitochondrial carrier ornithine transporter), member 15                                                      | -1.18 | 1.90E-06 |
| 19092     | Prkg2         | protein kinase, cGMP-dependent, type II                                                                                                | -1.18 | 8.70E-05 |
| 66522     | Pgpep1        | pyroglutamy-peptidase I                                                                                                                | -1.18 | 2.40E-06 |
| 269593    | Luzp1         | leucine zipper protein 1                                                                                                               | -1.18 | 6.00E-07 |
| 14792     | ILMN_210660   | Mus musculus lysophosphatidylcholine acyltransferase 3 (Lpcat3), mRNA.                                                                 | -1.18 | 4.90E-05 |
| 100048721 | ILMN_210479   | PREDICTED: Mus musculus similar to fibronectin leucine rich transmembrane protein 3, transcript variant 1 (LOC100048721), mRNA.        | -1.18 | 1.20E-05 |
| 16619     | Kik1b27       | kallikrein 1-related peptidase b27                                                                                                     | -1.18 | 0.00021  |
| 16362     | Irf1          | interferon regulatory factor 1                                                                                                         | -1.18 | 0.00081  |
| 27399     | Ip6k1         | inositol hexaphosphate kinase 1                                                                                                        | -1.18 | 7.10E-05 |
| 114664    | Hsd17b11      | hydroxysteroid (17-beta) dehydrogenase 11                                                                                              | -1.18 | 0.0014   |
| 78088     | Ankrd56       | ankyrin repeat domain 56                                                                                                               | -1.18 | 2.70E-05 |
| 27403     | Abca7         | ATP-binding cassette, sub-family A (ABC1), member 7                                                                                    | -1.18 | 1.10E-05 |
| 69137     | 2200002K05Rik | RIKEN cDNA 2200002K05 gene                                                                                                             | -1.18 | 1.80E-05 |
| 19331     | Rab19         | RAB19, member RAS oncogene family                                                                                                      | -1.19 | 6.50E-06 |
| 18718     | Pip4k2a       | phosphatidylinositol-5-phosphate 4-kinase, type II, alpha                                                                              | -1.19 | 7.00E-04 |
| 26424     | Nr5a2         | nuclear receptor subfamily 5, group A, member 2                                                                                        | -1.19 | 8.90E-05 |
| 76273     | Ndfip2        | Nedd4 family interacting protein 2                                                                                                     | -1.19 | 3.90E-05 |
| 245049    | Myrip         | myosin VIIA and Rab interacting protein                                                                                                | -1.19 | 0.0017   |
| 64899     | Lpin3         | lipin 3                                                                                                                                | -1.19 | 3.60E-05 |
| 100048313 | ILMN_209018   | PREDICTED: Mus musculus similar to ABC transporter, transcript variant 1 (LOC100048313), mRNA.                                         | -1.19 | 1.40E-05 |
| 100047214 | ILMN_211513   | PREDICTED: Mus musculus similar to PTEN induced putative kinase 1 (LOC100047214), mRNA.                                                | -1.19 | 1.70E-05 |
| 26931     | Ppp2r5c       | protein phosphatase 2, regulatory subunit B (B56), gamma isoform                                                                       | -1.19 | 4.30E-05 |
| 56055     | Gtbp2         | GTP binding protein 2                                                                                                                  | -1.19 | 2.10E-05 |
| 93692     | Glr3          | glutaredoxin                                                                                                                           | -1.19 | 1.40E-05 |
| 13179     | Dcn           | decorin                                                                                                                                | -1.19 | 0.015    |
| 12721     | Coro1a        | coronin, actin binding protein 1A                                                                                                      | -1.19 | 0.0095   |
| 75600     | Calml4        | calmodulin-like 4                                                                                                                      | -1.19 | 0.00052  |
| 14605     | Tsc2d3        | TSC22 domain family, member 3                                                                                                          | -1.2  | 0.00012  |
| 21807     | Tsc2d1        | TSC22 domain family, member 1                                                                                                          | -1.2  | 0.00028  |
| 252972    | Tpcn1         | two pore channel 1                                                                                                                     | -1.2  | 3.00E-05 |
| 108995    | ILMN_216821   | Mus musculus TBC1 domain family, member 10c (Tbc1d10c), mRNA.                                                                          | -1.2  | 7.10E-05 |
| 100434    | ILMN_219323   | Mus musculus solute carrier family 44, member 1 (Slc44a1), mRNA.                                                                       | -1.2  | 1.30E-05 |

|           |               |                                                                                               |       |          |
|-----------|---------------|-----------------------------------------------------------------------------------------------|-------|----------|
| 20520     | Slc22a5       | solute carrier family 22 (organic cation transporter), member 5                               | -1.2  | 1.60E-06 |
| 98732     | Rab3gap2      | RAB3 GTPase activating protein subunit 2                                                      | -1.2  | 2.70E-07 |
| 18946     | Pnlppr1       | pancreatic lipase related protein 1                                                           | -1.2  | 0.03     |
| 80859     | Nfkbi2        | nuclear factor of kappa light polypeptide gene enhancer in B-cells inhibitor, zeta            | -1.2  | 0.015    |
| 26390     | Mapkbp1       | mitogen-activated protein kinase binding protein 1                                            | -1.2  | 8.10E-06 |
| 100044538 | ILMN_209739   | PREDICTED: Mus musculus similar to immunity-associated nucleotide 4 (LOC100044538), misc RNA. | -1.2  | 1.50E-05 |
| 70101     | Cyp4f16       | cytochrome P450, family 4, subfamily f, polypeptide 16                                        | -1.2  | 0.00081  |
| 20305     | Ccl6          | chemokine (C-C motif) ligand 6                                                                | -1.2  | 6.50E-06 |
| 54608     | Abhd2         | abhydrolase domain containing 2                                                               | -1.2  | 0.00026  |
| 12780     | Abcc2         | ATP-binding cassette, sub-family C (CFTR/MRP), member 2                                       | -1.2  | 0.00058  |
| 74131     | Sash3         | SAM and SH3 domain containing 3                                                               | -1.2  | 0.00044  |
| 106759    | ILMN_193595   | Mus musculus toll-like receptor adaptor molecule 1 (Ticam1), mRNA.                            | -1.21 | 1.20E-07 |
| 72065     | Rap2c         | RAP2C, member of RAS oncogene family                                                          | -1.21 | 0.00051  |
| 16913     | Psmb8         | proteasome (prosome, macropain) subunit, beta type 8 (large multifunctional peptidase 7)      | -1.21 | 0.00058  |
| 226971    | Plekhh2       | pleckstrin homology domain containing, family B (evectins) member 2                           | -1.21 | 4.90E-06 |
| 23971     | Papsl1        | 3'-phosphoadenosine 5'-phosphosulfate synthase 1                                              | -1.21 | 4.00E-07 |
| 21428     | Mlx           | MAX-like protein X                                                                            | -1.21 | 2.90E-05 |
| 66447     | Mgst3         | microsomal glutathione S-transferase 3                                                        | -1.21 | 6.90E-06 |
| 16400     | Itga3         | integrin alpha 3                                                                              | -1.21 | 1.50E-06 |
| 54123     | Irf7          | interferon regulatory factor 7                                                                | -1.21 | 0.023    |
| 320541    | Slc35e2       | solute carrier family 35, member E2                                                           | -1.21 | 0.00017  |
| 72046     | Urgcp         | upregulator of cell proliferation                                                             | -1.21 | 1.60E-05 |
| 58176     | Rhbfg         | Rhesus blood group-associated B glycoprotein                                                  | -1.22 | 0.00045  |
| 72065     | ILMN_211579   | Mus musculus RAP2C, member of RAS oncogene family (Rap2c), mRNA.                              | -1.22 | 3.80E-06 |
| 16407     | Itgae         | integrin alpha E, epithelial-associated                                                       | -1.22 | 2.60E-05 |
| 14710     | Gngt2         | guanine nucleotide binding protein (G protein), gamma transducing activity polypeptide 2      | -1.22 | 1.10E-05 |
| 53897     | Gal3st1       | galactose-3-O-sulfotransferase 1                                                              | -1.22 | 0.00013  |
| 98845     | Eps8l2        | EPS8-like 2                                                                                   | -1.22 | 1.50E-06 |
| 329540    | 8430427H17Rik | RIKEN cDNA 8430427H17 gene                                                                    | -1.22 | 1.80E-06 |
| 56434     | Tspan3        | tetraspanin 3                                                                                 | -1.23 | 5.90E-05 |
| 56786     | Tmem9b        | TMEM9 domain family, member B                                                                 | -1.23 | 1.20E-05 |
| 170459    | Stard4        | STAR-related lipid transfer (START) domain containing 4                                       | -1.23 | 0.0041   |
| 102141    | Snx25         | sorting nexin 25                                                                              | -1.23 | 4.40E-06 |
| 228765    | Sdcbp2        | syndecan binding protein (syntenin) 2                                                         | -1.23 | 6.00E-06 |
| 72333     | Palld         | palladin, cytoskeletal associated protein                                                     | -1.23 | 0.00015  |
| 66447     | Mgst3         | microsomal glutathione S-transferase 3                                                        | -1.23 | 0.00021  |
| 68180     | Hyi           | hydroxypruvate isomerase homolog (E. coli)                                                    | -1.23 | 0.0018   |
| 12363     | ILMN_213344   | Mus musculus caspase 4, apoptosis-related cysteine peptidase (Casp4), mRNA.                   | -1.23 | 0.0091   |
| 171207    | ILMN_216990   | Mus musculus Rho GTPase activating protein 4 (Arhgap4), mRNA.                                 | -1.23 | 2.00E-05 |
| 71874     | 2310007B03Rik | RIKEN cDNA 2310007B03 gene                                                                    | -1.23 | 6.20E-05 |
| 272589    | Tbcel         | tubulin folding cofactor E-like                                                               | -1.24 | 0.00013  |
| 20491     | Sla           | src-like adaptor                                                                              | -1.24 | 1.00E-04 |
| 19341     | Rab4a         | RAB4A, member RAS oncogene family                                                             | -1.24 | 8.40E-06 |
| 15468     | Prmt2         | protein arginine N-methyltransferase 2                                                        | -1.24 | 1.30E-05 |
| 66734     | Map1lc3a      | microtubule-associated protein 1 light chain 3 alpha                                          | -1.24 | 4.70E-05 |
| 17160     | Man2b2        | mannosidase 2, alpha B2                                                                       | -1.24 | 4.20E-06 |
| 54120     | Gipc2         | GIPC PDZ domain containing family, member 2                                                   | -1.24 | 4.30E-05 |
| 14464     | Gata5         | GATA binding protein 5                                                                        | -1.24 | 1.90E-06 |
| 16800     | Arhgef2       | rho/rac guanine nucleotide exchange factor (GEF) 2                                            | -1.24 | 2.50E-06 |
| 94284     | ILMN_184466   | Mus musculus UDP glucuronosyltransferase 1 family, polypeptide A6A (Ugt1a6a), mRNA.           | -1.25 | 4.30E-05 |
| 214158    | Trim38        | tripartite motif-containing 38                                                                | -1.25 | 8.40E-06 |
| 66847     | Hint3         | histidine triad nucleotide binding protein 3                                                  | -1.25 | 3.80E-07 |
| 13835     | Epha1         | Eph receptor A1                                                                               | -1.25 | 3.20E-05 |
| 13518     | Dst           | dystonin                                                                                      | -1.25 | 0.00043  |
| 70101     | ILMN_220247   | Mus musculus cytochrome P450, family 4, subfamily f, polypeptide 16 (Cyp4f16), mRNA.          | -1.25 | 0.00038  |
| 269336    | Cdc32         | coiled-coil domain containing 32                                                              | -1.25 | 1.30E-07 |
| 110075    | Bmp3          | bone morphogenetic protein 3                                                                  | -1.25 | 0.0081   |
| 67809     | Fam82a2       | family with sequence similarity 82, member A2                                                 | -1.25 | 1.40E-06 |
| 16969     | Zbtb7a        | zinc finger and BTB domain containing 7a                                                      | -1.26 | 0.012    |
| 240832    | Tor1aip2      | torin A interacting protein 2                                                                 | -1.26 | 5.30E-06 |
| 21356     | ILMN_244571   | Mus musculus TAP binding protein (Tapbp), transcript variant 1, mRNA.                         | -1.26 | 0.00029  |
| 228765    | Sdcbp2        | syndecan binding protein (syntenin) 2                                                         | -1.26 | 1.30E-06 |
| 18762     | Prkez         | protein kinase C, zeta                                                                        | -1.26 | 5.10E-07 |
| 77827     | ILMN_253546   | Mus musculus KRAB-A domain containing 1 (KrbA1), mRNA.                                        | -1.26 | 1.50E-05 |
| 16428     | Itk           | IL2-inducible T-cell kinase                                                                   | -1.26 | 1.70E-05 |
| 14062     | F2r           | coagulation factor II (thrombin) receptor                                                     | -1.26 | 0.00042  |
| 67460     | Decr1         | 2,4-dienoyl CoA reductase 1, mitochondrial                                                    | -1.26 | 0.00013  |
| 67484     | Eepd1         | endonuclease/exonuclease/phosphatase family domain containing 1                               | -1.26 | 4.20E-05 |
| 21888     | Tle4          | transducin-like enhancer of split 4, homolog of Drosophila E(spl)                             | -1.27 | 5.10E-07 |
| 22644     | Rnf103        | ring finger protein 103                                                                       | -1.27 | 8.80E-09 |
| 72065     | ILMN_211579   | Mus musculus RAP2C, member of RAS oncogene family (Rap2c), mRNA.                              | -1.27 | 8.40E-06 |
| 102693    | Phldb1        | pleckstrin homology-like domain, family B, member 1                                           | -1.27 | 9.30E-05 |
| 217214    | Nags          | N-acetylglutamate synthase                                                                    | -1.27 | 3.00E-07 |
| 171580    | Mical1        | microtubule associated monooxygenase, calponin and LIM domain containing 1                    | -1.27 | 0.00061  |
| 216136    | Ilvb1         | ilvB (bacterial acetolactate synthase)-like                                                   | -1.27 | 5.90E-08 |
| 15248     | Hic1          | hypermethylated in cancer 1                                                                   | -1.27 | 3.60E-06 |
| 13197     | Gadd45a       | growth arrest and DNA-damage-inducible 45 alpha                                               | -1.27 | 0.00034  |
| 114601    | Ehbp111       | EH domain binding protein 1-like 1                                                            | -1.27 | 6.50E-06 |
| 94219     | ILMN_219676   | Mus musculus cyclin M2 (Cnm2), mRNA.                                                          | -1.27 | 2.00E-07 |
| 213056    | Fam126b       | family with sequence similarity 126, member B                                                 | -1.27 | 0.00015  |
| 11772     | Ap2a2         | adaptor protein complex AP-2, alpha 2 subunit                                                 | -1.27 | 2.70E-07 |
| 106759    | Ticam1        | toll-like receptor adaptor molecule 1                                                         | -1.28 | 0.00011  |
| 14526     | Gcg           | glucagon                                                                                      | -1.28 | 6.10E-05 |
| 218865    | Chdh          | choline dehydrogenase                                                                         | -1.28 | 1.80E-05 |
| 234564    | Ces1f         | carboxylesterase 1F                                                                           | -1.28 | 0.00075  |
| 19885     | Rorc          | RAR-related orphan receptor gamma                                                             | -1.29 | 0.0042   |
| 66901     | ILMN_193507   | Mus musculus protein Z, vitamin K-dependent plasma glycoprotein (Proz), mRNA.                 | -1.29 | 3.30E-08 |
| 23971     | Papsl1        | 3'-phosphoadenosine 5'-phosphosulfate synthase 1                                              | -1.29 | 7.60E-07 |
| 65113     | ILMN_238643   | Mus musculus Nedd4 family interacting protein 1 (Ndfip1), mRNA.                               | -1.29 | 5.20E-05 |
| 211798    | Mfsd9         | major facilitator superfamily domain containing 9                                             | -1.29 | 0.00017  |
| 26379     | Esrra         | estrogen related receptor, alpha                                                              | -1.29 | 2.00E-07 |
| 98845     | Eps8l2        | EPS8-like 2                                                                                   | -1.29 | 1.10E-07 |
| 110524    | Dgkq          | diacylglycerol kinase, theta                                                                  | -1.29 | 7.10E-05 |
| 320661    | D5Erd579e     | DNA segment, Chr 5, ERATO Doi 579, expressed                                                  | -1.29 | 5.10E-07 |
| 17684     | Cited2        | Chbp/p300-interacting transactivator, with Glu/Asp-rich carboxy-terminal domain, 2            | -1.29 | 1.50E-05 |
| 12700     | Cish          | cytokine inducible SH2-containing protein                                                     | -1.29 | 2.30E-05 |
| 106952    | Arap3         | ArfGAP with RhoGAP domain, ankyrin repeat and PH domain 3                                     | -1.29 | 0.00075  |
| 66548     | Adamts15      | ADAMTS-like 5                                                                                 | -1.29 | 2.20E-05 |
| 67776     | ILMN_211556   | Mus musculus von Willebrand factor A domain containing 5A (Vwa5a), mRNA.                      | -1.3  | 0.00013  |
| 26944     | Tinag         | tubulointerstitial nephritis antigen                                                          | -1.3  | 5.30E-06 |
| 18770     | Pklr          | pyruvate kinase liver and red blood cell                                                      | -1.3  | 1.40E-06 |
| 66904     | ILMN_212103   | Mus musculus propionyl Coenzyme A carboxylase, beta polypeptide (Pccb), mRNA.                 | -1.3  | 1.70E-06 |
| 18261     | ILMN_212136   | Mus musculus oncomodulin (Ocn), mRNA.                                                         | -1.3  | 7.50E-06 |
| 56217     | Mpp5          | membrane protein, palmitoylated 5 (MAGUK p55 subfamily member 5)                              | -1.3  | 0.00027  |
| 243197    | Mfsd7a        | major facilitator superfamily domain containing 7A                                            | -1.3  | 3.00E-04 |
| 66905     | ILMN_214383   | Mus musculus mannose-6-phosphate receptor binding protein 1 (M6prbp1), mRNA.                  | -1.3  | 9.40E-05 |
| 216874    | Camta2        | calmodulin binding transcription activator 2                                                  | -1.3  | 5.30E-06 |
| 100317    | ILMN_220412   | Mus musculus expressed sequence AU040320 (AU040320), transcript variant 3, mRNA.              | -1.3  | 6.20E-08 |
| 225997    | Trpm6         | transient receptor potential cation channel, subfamily M, member 6                            | -1.31 | 0.00017  |
| 69769     | Tnfrsf8l2     | tumor necrosis factor, alpha-induced protein 8-like 2                                         | -1.31 | 1.70E-06 |
| 52187     | Rragd         | Ras-related GTP binding D                                                                     | -1.31 | 2.70E-06 |
| 16622     | Kik1b5        | kallikrein 1-related peptidase b5                                                             | -1.31 | 4.10E-06 |
| 16529     | Kcnk5         | potassium channel, subfamily K, member 5                                                      | -1.31 | 1.60E-05 |
| 108960    | ILMN_217595   | Mus musculus interleukin-1 receptor-associated kinase 2 (Irak2), mRNA.                        | -1.31 | 0.00016  |
| 15018     | ILMN_196751   | Mus musculus histocompatibility 2, Q region locus 7 (H2-Q7), mRNA.                            | -1.31 | 0.00015  |
| 12526     | Cd8b1         | CD8 antigen, beta chain 1                                                                     | -1.31 | 0.0071   |
| 192653    | Ttc36         | tetratricopeptide repeat domain 36                                                            | -1.32 | 8.30E-06 |

|                     |                                                                                                                  |       |          |
|---------------------|------------------------------------------------------------------------------------------------------------------|-------|----------|
| 215335 Slc36a1      | solute carrier family 36 (proton/amino acid symporter), member 1                                                 | -1.32 | 0.00029  |
| 20526 Slc2a2        | solute carrier family 2 (facilitated glucose transporter), member 2                                              | -1.32 | 3.90E-05 |
| 20254 Scg2          | secretogranin II                                                                                                 | -1.32 | 6.00E-07 |
| 18703 Pigr          | polymeric immunoglobulin receptor                                                                                | -1.32 | 0.00061  |
| 66522 ILMN_209658   | Mus musculus pyroglutamyl-peptidase I (Pgpep1), mRNA.                                                            | -1.32 | 4.20E-06 |
| 16612 Kik1          | kallikrein 1                                                                                                     | -1.32 | 0.0022   |
| 228550 Itpka        | inositol 1,4,5-trisphosphate 3-kinase A                                                                          | -1.32 | 2.40E-05 |
| 16432 Itm2b         | integral membrane protein 2B                                                                                     | -1.32 | 0.00033  |
| 235582 ILMN_209622  | Mus musculus glycerate kinase (Glyctk), transcript variant 1, mRNA.                                              | -1.32 | 3.40E-07 |
| 13660 Ehd1          | EH-domain containing 1                                                                                           | -1.32 | 2.80E-06 |
| 21871 Atp6v0a2      | ATPase, H+ transporting, lysosomal V0 subunit A2                                                                 | -1.32 | 3.90E-07 |
| 11541 ILMN_222330   | Mus musculus adenosine A2b receptor (Adora2b), mRNA.                                                             | -1.32 | 5.30E-05 |
| 319613 Sybu         | syntabulin (syntaxin-interacting)                                                                                | -1.32 | 2.80E-05 |
| 22337 Vdr           | vitamin D receptor                                                                                               | -1.33 | 3.90E-06 |
| 66824 ILMN_223398   | Mus musculus PYD and CARD domain containing (Pycard), mRNA.                                                      | -1.33 | 2.50E-05 |
| 213171 ILMN_209963  | Mus musculus protease, serine 27 (Prss27), mRNA.                                                                 | -1.33 | 0.00017  |
| 54683 Prdx5         | peroxiredoxin 5                                                                                                  | -1.33 | 5.30E-05 |
| 72175 Mfsd8         | major facilitator superfamily domain containing 8                                                                | -1.33 | 9.30E-06 |
| 56743 Lat2          | linker for activation of T cells family, member 2                                                                | -1.33 | 3.20E-05 |
| 54720 Rcan1         | regulator of calcineurin 1                                                                                       | -1.33 | 4.40E-05 |
| 23827 ILMN_210031   | Mus musculus bisphosphate 3'-nucleotidase 1 (Bpnt1), mRNA.                                                       | -1.33 | 1.10E-05 |
| 215723 Mfsd6l       | major facilitator superfamily domain containing 6-like                                                           | -1.33 | 3.20E-05 |
| 20345 Selplg        | selectin, platelet (p-selectin) ligand                                                                           | -1.34 | 4.00E-04 |
| 19116 Prlr          | prolactin receptor                                                                                               | -1.34 | 3.40E-07 |
| 66612 Ormdl3        | ORM1-like 3 (S. cerevisiae)                                                                                      | -1.34 | 1.90E-06 |
| 16529 Kcnk5         | potassium channel, subfamily K, member 5                                                                         | -1.34 | 3.80E-06 |
| 16362 Irf1          | interferon regulatory factor 1                                                                                   | -1.34 | 8.90E-05 |
| 239853 Gpr128       | G protein-coupled receptor 128                                                                                   | -1.34 | 1.30E-05 |
| 78816 ILMN_220865   | Mus musculus Gem-interacting protein (Gmip), mRNA.                                                               | -1.34 | 5.50E-06 |
| 231931 Gimap6       | GTPase, IMAP family member 6                                                                                     | -1.34 | 0.001    |
| 74147 Ehhadh        | enoyl-Coenzyme A, hydratase/3-hydroxyacyl Coenzyme A dehydrogenase                                               | -1.34 | 6.50E-06 |
| 13195 Ddc           | dopa decarboxylase                                                                                               | -1.34 | 5.40E-05 |
| 192976 ILMN_211693  | Mus musculus cDNA sequence BC046404 (BC046404), mRNA.                                                            | -1.34 | 6.70E-06 |
| 382000 AY761184     | cDNA sequence AY761184                                                                                           | -1.34 | 0.00531  |
| 171282 Aco4         | acyl-CoA thioesterase 4                                                                                          | -1.34 | 9.60E-06 |
| 30962 Slc7a9        | solute carrier family 7 (cationic amino acid transporter, y+ system), member 9                                   | -1.35 | 2.50E-05 |
| 54683 Prdx5         | peroxiredoxin 5                                                                                                  | -1.35 | 8.20E-06 |
| 16439 Ipr2          | inositol 1,4,5-trisphosphate receptor 2                                                                          | -1.35 | 2.70E-05 |
| 52710 Gpr172b       | G protein-coupled receptor 172B                                                                                  | -1.35 | 8.30E-06 |
| 68177 Ebpl          | emopamil binding protein-like                                                                                    | -1.35 | 4.10E-06 |
| 12153 Bmp1          | bone morphogenetic protein 1                                                                                     | -1.35 | 1.10E-05 |
| 20334 Sec23a        | SEC23A (S. cerevisiae)                                                                                           | -1.36 | 0.00023  |
| 171580 Mical1       | microtubule associated monooxygenase, calponin and LIM domain containing 1                                       | -1.36 | 5.20E-06 |
| 77827 ILMN_192115   | Mus musculus KRAB-A domain containing 1 (Krbal), mRNA.                                                           | -1.36 | 0.00041  |
| 27356 Insl6         | insulin-like 6                                                                                                   | -1.36 | 4.70E-06 |
| 110168 Gpr18        | G protein-coupled receptor 18                                                                                    | -1.36 | 2.70E-05 |
| 12721 Coro1a        | coronin, actin binding protein 1A                                                                                | -1.36 | 1.00E-04 |
| 433256 Acs15        | acyl-CoA synthetase long-chain family member 5                                                                   | -1.36 | 1.80E-06 |
| 80911 Acox3         | acyl-Coenzyme A oxidase 3, pristanoyl                                                                            | -1.36 | 2.40E-05 |
| 106861 Abhd3        | abhydrolase domain containing 3                                                                                  | -1.36 | 0.00017  |
| 394430 ILMN_233870  | Mus musculus UDP glycosyltransferase 1 family, polypeptide A10 (Ugt1a10), mRNA.                                  | -1.37 | 4.60E-05 |
| 243771 ILMN_188937  | Mus musculus poly (ADP-ribose) polymerase family, member 12 (Parp12), mRNA.                                      | -1.37 | 0.00014  |
| 226144 Erlin1       | ER lipid raft associated 1                                                                                       | -1.37 | 5.50E-06 |
| 71934 Car13         | carbonic anhydrase 13                                                                                            | -1.37 | 4.20E-06 |
| 11832 Aqp7          | aquaporin 7                                                                                                      | -1.37 | 0.0013   |
| 60455 Tmem8         | transmembrane protein 8 (five membrane-spanning domains)                                                         | -1.38 | 2.20E-06 |
| 16792 Laptm5        | lysosomal-associated protein transmembrane 5                                                                     | -1.38 | 0.0023   |
| 16164 Il13ra1       | interleukin 13 receptor, alpha 1                                                                                 | -1.38 | 7.30E-06 |
| 14302 Frk           | fyn-related kinase                                                                                               | -1.38 | 0.0031   |
| 71898 Apol9b        | apolipoprotein L 9b                                                                                              | -1.38 | 0.0095   |
| 19299 Abcd3         | ATP-binding cassette, sub-family D (ALD), member 3                                                               | -1.38 | 1.50E-06 |
| 50778 Rgs1          | regulator of G-protein signaling 1                                                                               | -1.39 | 2.00E-06 |
| 15468 Prmt2         | protein arginine N-methyltransferase 2                                                                           | -1.39 | 4.40E-06 |
| 18753 Prkcd         | protein kinase C, delta                                                                                          | -1.39 | 4.30E-08 |
| 211666 Mgst2        | microsomal glutathione S-transferase 2                                                                           | -1.39 | 5.10E-07 |
| 23849 Klf6          | Kruppel-like factor 6                                                                                            | -1.39 | 0.01     |
| 30942 Hnf4g         | hepatocyte nuclear factor 4, gamma                                                                               | -1.39 | 2.50E-06 |
| 15267 Hist2h2aa1    | histone cluster 2, H2aa1                                                                                         | -1.39 | 4.60E-05 |
| 13198 Ddit3         | DNA-damage inducible transcript 3                                                                                | -1.39 | 2.20E-07 |
| 13191 Dctn1         | dynactin 1                                                                                                       | -1.39 | 2.40E-05 |
| 22349 Vill1         | villin 1                                                                                                         | -1.4  | 3.90E-07 |
| 100727 Ugt2b34      | UDP glucuronosyltransferase 2 family, polypeptide B34                                                            | -1.4  | 0.00086  |
| 380712 Tlcd2        | TLC domain containing 2                                                                                          | -1.4  | 1.50E-05 |
| 11853 Rhoc          | ras homolog gene family, member C                                                                                | -1.4  | 2.50E-05 |
| 329416 Nostrin      | nitric oxide synthase trafficker                                                                                 | -1.4  | 5.90E-05 |
| 21386 Tbx3          | T-box 3                                                                                                          | -1.4  | 0.00017  |
| 74424 Tmc5          | transmembrane channel-like gene family 5                                                                         | -1.41 | 2.40E-05 |
| 20482 Skil          | SKI-like                                                                                                         | -1.41 | 0.00036  |
| 20719 Serpinb6a     | serine (or cysteine) peptidase inhibitor, clade B, member 6a                                                     | -1.41 | 1.70E-07 |
| 20351 Sema4a        | sema domain, immunoglobulin domain (Ig), transmembrane domain (TM) and short cytoplasmic domain, (semaphorin) 4A | -1.41 | 1.10E-06 |
| 545902 Ptptr        | protein tyrosine phosphatase, receptor type, H                                                                   | -1.41 | 5.10E-05 |
| 29817 Igtbp7        | insulin-like growth factor binding protein 7                                                                     | -1.41 | 0.0078   |
| 66610 Abi3          | ABI gene family, member 3                                                                                        | -1.41 | 0.00032  |
| 217203 Tmem106a     | transmembrane protein 106A                                                                                       | -1.42 | 9.80E-07 |
| 213171 ILMN_209963  | Mus musculus protease, serine 27 (Prss27), mRNA.                                                                 | -1.42 | 0.0015   |
| 18293 Ogdh          | oxoglutarate dehydrogenase (liponamide)                                                                          | -1.42 | 8.50E-07 |
| 71207 ILMN_212961   | Mus musculus nudix (nucleoside diphosphate linked moiety X)-type motif 4 (Nudt4), mRNA.                          | -1.42 | 0.00015  |
| 104943 Fam110c      | family with sequence similarity 110, member C                                                                    | -1.42 | 9.20E-06 |
| 109791 Clps         | colipase, pancreatic                                                                                             | -1.42 | 0.0024   |
| 11828 Aqp3          | aquaporin 3                                                                                                      | -1.42 | 1.40E-07 |
| 223920 Ssat2        | sterol O-acyltransferase 2                                                                                       | -1.43 | 2.80E-06 |
| 20520 Slc22a5       | solute carrier family 22 (organic cation transporter), member 5                                                  | -1.43 | 4.90E-07 |
| 23954 Nek3          | NIMA (never in mitosis gene a)-related expressed kinase 3                                                        | -1.43 | 4.70E-06 |
| 56541 Habp4         | hyaluronic acid binding protein 4                                                                                | -1.43 | 1.90E-05 |
| 69068 1810011O10Rik | RIKEN cDNA 1810011O10 gene                                                                                       | -1.43 | 5.00E-04 |
| 69769 Tnfrsf10b     | tumor necrosis factor, alpha-induced protein 8-like 2                                                            | -1.44 | 8.20E-09 |
| 229731 Slc25a24     | solute carrier family 25 (mitochondrial carrier, phosphate carrier), member 24                                   | -1.44 | 1.20E-05 |
| 213019 Pdlim2       | PDZ and LIM domain 2                                                                                             | -1.44 | 0.0012   |
| 68671 Pcyt2         | phosphate cytidylyltransferase 2, ethanalamine                                                                   | -1.44 | 0.00013  |
| 269423 ILMN_213311  | Mus musculus RIKEN cDNA 3110057012 gene (3110057012Rik), mRNA.                                                   | -1.44 | 1.60E-06 |
| 67473 Slc47a1       | solute carrier family 47, member 1                                                                               | -1.44 | 2.40E-06 |
| 215113 Slc43a2      | solute carrier family 43, member 2                                                                               | -1.45 | 1.60E-06 |
| 72040 Cdh85         | cadherin-related family member 5                                                                                 | -1.45 | 2.20E-06 |
| 382045 ILMN_236509  | Mus musculus G protein-coupled receptor 114 (Gpr114), mRNA.                                                      | -1.45 | 0.00022  |
| 238011 Enpp7        | ectonucleotide pyrophosphatase/phosphodiesterase 7                                                               | -1.45 | 9.20E-07 |
| 12557 Cdh17         | cadherin 17                                                                                                      | -1.45 | 8.50E-05 |
| 231821 Adap1        | ArfGAP with dual PH domains 1                                                                                    | -1.45 | 1.10E-05 |
| 170750 Xpnppep1     | X-prolyl aminopeptidase (aminopeptidase P) 1, soluble                                                            | -1.46 | 1.00E-04 |
| 18408 Slc25a15      | solute carrier family 25 (mitochondrial carrier ornithine transporter), member 15                                | -1.46 | 5.50E-06 |
| 76608 ILMN_213485   | Mus musculus HECT domain containing 3 (Hectd3), mRNA.                                                            | -1.46 | 2.30E-07 |
| 22637 Zap70         | zeta-chain (TCR) associated protein kinase                                                                       | -1.47 | 0.00028  |
| 21838 Thy1          | thymus cell antigen 1, theta                                                                                     | -1.47 | 3.60E-05 |
| 230612 Slc5a9       | solute carrier family 5 (sodium/glucose cotransporter), member 9                                                 | -1.47 | 9.10E-06 |
| 70129 Slc44a4       | solute carrier family 44, member 4                                                                               | -1.47 | 4.70E-06 |
| 19419 Rasgrp1       | RAS guanyl releasing protein 1                                                                                   | -1.47 | 0.00013  |
| 69693 Pof1b         | premature ovarian failure 1B                                                                                     | -1.47 | 5.40E-07 |
| 114664 Hsd17b11     | hydroxysteroid (17-beta) dehydrogenase 11                                                                        | -1.47 | 2.30E-05 |

|           |               |                                                                                              |       |          |
|-----------|---------------|----------------------------------------------------------------------------------------------|-------|----------|
| 104158    | Ces1d         | carboxylesterase 1D                                                                          | -1.47 | 0.0016   |
| 74646     | Spsb1         | splA/ryanodine receptor domain and SOCS box containing 1                                     | -1.48 | 4.00E-05 |
| 19329     | ILMN_215232   | Mus musculus RAB17, member RAS oncogene family (Rab17), mRNA.                                | -1.48 | 1.70E-08 |
| 106581    | Ifg3          | integrin alpha FG-GAP repeat containing 3                                                    | -1.48 | 1.60E-07 |
| 246694    | ILMN_246729   | Mus musculus Hermansky-Pudlak syndrome 5 homolog (human) (Hps5), transcript variant 2, mRNA. | -1.48 | 3.10E-05 |
| 63986     | ILMN_217353   | Mus musculus glia maturation factor, gamma (Gmfg), transcript variant 1, mRNA.               | -1.48 | 6.00E-06 |
| 112407    | Egln3         | EGL nine homolog 3 (C. elegans)                                                              | -1.48 | 0.00015  |
| 12721     | Coro1a        | coronin, actin binding protein 1A                                                            | -1.48 | 0.0024   |
| 12716     | Ckmt1         | creatine kinase, mitochondrial 1, ubiquitous                                                 | -1.48 | 1.20E-07 |
| 74340     | Ahcy12        | S-adenosylhomocysteine hydrolase-like 2                                                      | -1.48 | 2.20E-05 |
| 22234     | Ugcg          | UDP-glucose ceramide glucosyltransferase                                                     | -1.49 | 5.70E-06 |
| 71660     | Rarres2       | retinoic acid receptor responder (tazarotene induced) 2                                      | -1.49 | 0.0095   |
| 18810     | Plec          | plectin                                                                                      | -1.49 | 3.00E-06 |
| 12355     | Nr113         | nuclear receptor subfamily 1, group I, member 3                                              | -1.49 | 1.70E-05 |
| 52585     | Dhrs1         | dehydrogenase/reductase (SDR family) member 1                                                | -1.49 | 4.00E-07 |
| 69274     | Ctdspl        | CTD (carboxy-terminal domain, RNA polymerase II, polypeptide A) small phosphatase-like       | -1.49 | 5.40E-07 |
| 12908     | Crat          | carnitine acetyltransferase                                                                  | -1.49 | 3.50E-08 |
| 71670     | Acy3          | aspartoacylase (aminoacylase) 3                                                              | -1.49 | 2.00E-06 |
| 72747     | Ttc39c        | tetratricopeptide repeat domain 39C                                                          | -1.49 | 3.20E-06 |
| 21401     | Tcea3         | transcription elongation factor A (SII), 3                                                   | -1.5  | 5.50E-06 |
| 69159     | Rheb11        | Ras homolog enriched in brain like 1                                                         | -1.5  | 4.40E-06 |
| 17309     | Mgat3         | mannoside acetylglucosaminyltransferase 3                                                    | -1.5  | 1.10E-06 |
| 68338     | Golt1a        | golgi transport 1 homolog A (S. cerevisiae)                                                  | -1.5  | 5.40E-05 |
| 14199     | Flh1          | four and a half LIM domains 1                                                                | -1.5  | 0.012    |
| 68778     | 1110038D17Rik | RIKEN cDNA 1110038D17 gene                                                                   | -1.5  | 8.80E-09 |
| 22268     | Uplk1b        | uroplakin 1B                                                                                 | -1.51 | 2.10E-05 |
| 235442    | Rab8b         | RAB8B, member RAS oncogene family                                                            | -1.51 | 9.50E-06 |
| 74137     | Nuak2         | NUAK family, SNF1-like kinase, 2                                                             | -1.51 | 9.20E-07 |
| 23900     | Hest          | hematopoietic cell signal transducer                                                         | -1.51 | 3.90E-09 |
| 16985     | Lsp1          | lymphocyte specific 1                                                                        | -1.51 | 4.50E-05 |
| 117591    | Slc2a9        | solute carrier family 2 (facilitated glucose transporter), member 9                          | -1.52 | 6.00E-07 |
| 104601    | Myebpap       | MYCBP associated protein                                                                     | -1.52 | 5.20E-06 |
| 17454     | Mov10         | Moloney leukemia virus 10                                                                    | -1.52 | 0.00037  |
| 14367     | Fzd5          | frizzled homolog 5 (Drosophila)                                                              | -1.52 | 1.50E-06 |
| 72056     | 1810055G02Rik | RIKEN cDNA 1810055G02 gene                                                                   | -1.52 | 4.60E-07 |
| 13430     | Dnm2          | dynamin 2                                                                                    | -1.53 | 9.80E-07 |
| 71904     | Psqr7         | progesterin and adipoQ receptor family member VII                                            | -1.53 | 2.70E-05 |
| 17961     | Nat2          | N-acetyltransferase 2 (arylamine N-acetyltransferase)                                        | -1.53 | 5.70E-06 |
| 100044204 | ILMN_221943   | PREDICTED: Mus musculus hypothetical protein LOC100044204 (LOC100044204), mRNA.              | -1.54 | 0.00026  |
| 109791    | Cips          | colipase, pancreatic                                                                         | -1.54 | 0.0038   |
| 12500     | Cd3d          | CD3 antigen, delta polypeptide                                                               | -1.54 | 0.00096  |
| 12452     | Ccng2         | cyclin G2                                                                                    | -1.54 | 0.00034  |
| 73833     | ILMN_214799   | Mus musculus RIKEN cDNA 1110006G06 gene (1110006G06Rik), mRNA.                               | -1.54 | 1.10E-06 |
| 384071    | Slc25a34      | solute carrier family 25, member 34                                                          | -1.55 | 2.00E-06 |
| 67815     | Sec14l2       | SEC14-like 2 (S. cerevisiae)                                                                 | -1.55 | 4.20E-07 |
| 19645     | Rb1           | retinoblastoma 1                                                                             | -1.55 | 7.30E-05 |
| 20186     | Nrlh4         | nuclear receptor subfamily 1, group H, member 4                                              | -1.55 | 1.90E-06 |
| 338403    | Cndp1         | carnosine dipeptidase 1 (metallopeptidase M20 family)                                        | -1.55 | 0.00016  |
| 11883     | Arsa          | arylsulfatase A                                                                              | -1.55 | 3.80E-06 |
| 73910     | Arhgap18      | Rho GTPase activating protein 18                                                             | -1.55 | 1.60E-05 |
| 11810     | Apobec1       | apolipoprotein B mRNA editing enzyme, catalytic polypeptide 1                                | -1.55 | 2.40E-05 |
| 384783    | Irs2          | insulin receptor substrate 2                                                                 | -1.56 | 0.006    |
| 108960    | Irak2         | interleukin-1 receptor-associated kinase 2                                                   | -1.56 | 1.50E-06 |
| 16176     | Il1b          | interleukin 1 beta                                                                           | -1.56 | 0.039    |
| 14990     | ILMN_226026   | Mus musculus histocompatibility 2, M region locus 2 (H2-M2), mRNA.                           | -1.56 | 9.10E-06 |
| 18301     | Fxyd5         | FXYD domain-containing ion transport regulator 5                                             | -1.56 | 0.00032  |
| 13821     | Epb4.111      | erythrocyte protein band 4.1-like 1                                                          | -1.56 | 6.90E-07 |
| 13216     | ILMN_196581   | Mus musculus defensin, alpha 1 (Defa1), mRNA.                                                | -1.56 | 2.30E-05 |
| 72088     | Ush1c         | Usher syndrome 1C homolog (human)                                                            | -1.57 | 3.20E-08 |
| 27219     | Sgk2          | serum/glucocorticoid regulated kinase 2                                                      | -1.57 | 0.00075  |
| 217837    | ILMN_220572   | Mus musculus inositol 1,3,4-triphosphate 5/6 kinase (Itpk1), mRNA.                           | -1.57 | 3.00E-06 |
| 16147     | Ihh           | Indian hedgehog                                                                              | -1.57 | 8.10E-05 |
| 69824     | Glod5         | glyoxalase domain containing 5                                                               | -1.57 | 5.10E-07 |
| 66298     | Defa21        | defensin, alpha, 21                                                                          | -1.57 | 0.0019   |
| 12652     | Chga          | chromogranin A                                                                               | -1.57 | 1.10E-05 |
| 74018     | ILMN_211844   | Mus musculus amyotrophic lateral sclerosis 2 (juvenile) homolog (human) (Als2), mRNA.        | -1.57 | 7.60E-06 |
| 67689     | Aldh3b1       | aldehyde dehydrogenase 3 family, member B1                                                   | -1.57 | 8.90E-07 |
| 14972     | ILMN_251122   | Mus musculus histocompatibility 2, K1, K region (H2-K1), mRNA.                               | -1.58 | 2.10E-05 |
| 63986     | ILMN_217353   | Mus musculus glia maturation factor, gamma (Gmfg), transcript variant 1, mRNA.               | -1.58 | 1.10E-06 |
| 74596     | Cds1          | CDP-diaclyglycerol synthase 1                                                                | -1.58 | 1.10E-08 |
| 12585     | Cdr2          | cerebellar degeneration-related 2                                                            | -1.58 | 3.90E-09 |
| 66395     | Ahnak         | AHNAK nucleoprotein (desmoyokin)                                                             | -1.58 | 5.70E-06 |
| 77577     | Spns3         | spinster homolog 3 (Drosophila)                                                              | -1.58 | 1.60E-06 |
| 328365    | Zmiz1         | zinc finger, MIZ-type containing 1                                                           | -1.59 | 0.00013  |
| 76650     | Srxn1         | sulfiredoxin 1 homolog (S. cerevisiae)                                                       | -1.59 | 3.40E-05 |
| 13131     | Dab1          | disabled homolog 1 (Drosophila)                                                              | -1.59 | 1.80E-06 |
| 11857     | Arhgdib       | Rho, GDP dissociation inhibitor (GDI) beta                                                   | -1.59 | 0.00026  |
| 215445    | Rab11fip3     | RAB11 family interacting protein 3 (class II)                                                | -1.6  | 3.20E-06 |
| 216136    | Ilvb1         | ilvB (bacterial acetolactate synthase)-like                                                  | -1.6  | 1.00E-07 |
| 78908     | Igsf3         | immunoglobulin superfamily, member 3                                                         | -1.6  | 2.40E-06 |
| 74018     | Als2          | amyotrophic lateral sclerosis 2 (juvenile) homolog (human)                                   | -1.6  | 2.60E-05 |
| 17921     | Myo7a         | myosin VIIA                                                                                  | -1.61 | 8.20E-07 |
| 11832     | ILMN_210666   | Mus musculus aquaporin 7 (Aqp7), mRNA.                                                       | -1.61 | 6.60E-08 |
| 107747    | ILMN_219033   | Mus musculus aldehyde dehydrogenase 1 family, member L1 (Aldh111), mRNA.                     | -1.61 | 8.90E-07 |
| 225997    | Trpm6         | transient receptor potential cation channel, subfamily M, member 6                           | -1.62 | 2.50E-05 |
| 103142    | ILMN_220451   | Mus musculus retinol dehydrogenase 9 (Rdh9), mRNA.                                           | -1.62 | 7.00E-04 |
| 23954     | Nek3          | NIMA (never in mitosis gene a)-related expressed kinase 3                                    | -1.62 | 4.60E-08 |
| 16995     | Ltb4r1        | leukotriene B4 receptor 1                                                                    | -1.62 | 8.90E-07 |
| 113868    | Acaa1a        | acetyl-Coenzyme A acyltransferase 1A                                                         | -1.62 | 3.30E-08 |
| 53906     | Phgr1         | proline/histidine/glycine-rich 1                                                             | -1.62 | 8.90E-07 |
| 23912     | Rhof1         | ras homolog gene family, member f                                                            | -1.63 | 1.40E-06 |
| 17119     | Mxd1          | MAX dimerization protein 1                                                                   | -1.63 | 0.00017  |
| 17434     | Mocs2         | molybdenum cofactor synthesis 2                                                              | -1.63 | 6.60E-10 |
| 53608     | Map3k6        | mitogen-activated protein kinase kinase kinase 6                                             | -1.63 | 6.60E-06 |
| 100044177 | ILMN_185055   | PREDICTED: Mus musculus hypothetical protein LOC100044177 (LOC100044177), mRNA.              | -1.63 | 7.50E-06 |
| 16407     | Itgae         | integrin alpha E, epithelial-associated                                                      | -1.63 | 6.80E-05 |
| 207819    | ILMN_212940   | Mus musculus RIKEN cDNA 4930539E08 gene (4930539E08Rik), mRNA.                               | -1.63 | 2.20E-05 |
| 19645     | Rb1           | retinoblastoma 1                                                                             | -1.64 | 1.80E-06 |
| 107029    | Me2           | malic enzyme 2, NAD(+)-dependent, mitochondrial                                              | -1.64 | 6.20E-08 |
| 14538     | Gcnt2         | glucosaminyl (N-acetyl) transferase 2, 1-branching enzyme                                    | -1.64 | 5.20E-06 |
| 13823     | Epb4.113      | erythrocyte protein band 4.1-like 3                                                          | -1.64 | 6.90E-08 |
| 67512     | Agpat2        | 1-acylglycerol-3-phosphate O-acyltransferase 2 (lysophosphatidic acid acyltransferase, beta) | -1.64 | 1.10E-06 |
| 170750    | Xpnpep1       | X-prolyl aminopeptidase (aminopeptidase P) 1, soluble                                        | -1.65 | 8.70E-05 |
| 66601     | Tmidg1        | transmembrane and immunoglobulin domain containing 1                                         | -1.65 | 2.00E-04 |
| 71436     | ILMN_210479   | Mus musculus fibronectin leucine rich transmembrane protein 3 (Fltr3), mRNA.                 | -1.65 | 1.10E-06 |
| 12962     | Crybb3        | crystallin, beta B3                                                                          | -1.65 | 1.50E-06 |
| 12808     | Cobl          | cordons-bleu                                                                                 | -1.65 | 1.70E-05 |
| 12163     | Bmp8a         | bone morphogenetic protein 8a                                                                | -1.65 | 1.10E-05 |
| 74153     | Uba7          | ubiquitin-like modifier activating enzyme 7                                                  | -1.66 | 0.00018  |
| 72002     | Slc39a5       | solute carrier family 39 (metal ion transporter), member 5                                   | -1.66 | 7.10E-05 |
| 64381     | Msd48a        | membrane-spanning 4-domains, subfamily A, member 8A                                          | -1.66 | 7.80E-08 |
| 16421     | Itgb7         | integrin beta 7                                                                              | -1.66 | 2.40E-05 |
| 69718     | Ipmk          | inositol polyphosphate multikinase                                                           | -1.66 | 1.40E-08 |
| 171095    | Il17rc        | interleukin 17 receptor C                                                                    | -1.66 | 1.30E-05 |
| 12652     | Chga          | chromogranin A                                                                               | -1.67 | 2.90E-07 |
| 12369     | ILMN_214491   | Mus musculus caspase 7 (Casp7), mRNA.                                                        | -1.67 | 3.00E-07 |
| 76650     | Srxn1         | sulfiredoxin 1 homolog (S. cerevisiae)                                                       | -1.68 | 1.10E-07 |



|           |               |                                                                                                                                 |       |          |
|-----------|---------------|---------------------------------------------------------------------------------------------------------------------------------|-------|----------|
| 72472     | Slc16a10      | solute carrier family 16 (monocarboxylic acid transporters), member 10                                                          | -1.68 | 3.70E-07 |
| 16600     | Klf4          | Kruppel-like factor 4 (gut)                                                                                                     | -1.68 | 8.00E-05 |
| 69718     | Ipmk          | inositol polyphosphate multikinase                                                                                              | -1.68 | 6.90E-08 |
| 107684    | Coro2a        | coronin, actin binding protein 2A                                                                                               | -1.68 | 2.10E-09 |
| 12014     | Bach2         | BTB and CNC homology 2                                                                                                          | -1.68 | 4.90E-05 |
| 66333     | Aqp11         | aquaporin 11                                                                                                                    | -1.68 | 3.50E-07 |
| 53376     | Usp2          | ubiquitin specific peptidase 2                                                                                                  | -1.69 | 3.00E-06 |
| 67405     | Nts           | neurotensin                                                                                                                     | -1.69 | 1.00E-04 |
| 15203     | Heph          | hephaestin                                                                                                                      | -1.69 | 6.20E-06 |
| 14651     | ILMN_221369   | Mus musculus hydroxyacyl glutathione hydrolase (Hagh), mRNA.                                                                    | -1.69 | 7.50E-09 |
| 58991     | Ghrl          | ghrelin                                                                                                                         | -1.69 | 1.20E-06 |
| 85308     | Fam158a       | family with sequence similarity 158, member A                                                                                   | -1.69 | 1.10E-05 |
| 13113     | Cyp3a13       | cytochrome P450, family 3, subfamily a, polypeptide 13                                                                          | -1.69 | 0.00065  |
| 12654     | Chi3l1        | chitinase 3-like 1                                                                                                              | -1.69 | 0.00998  |
| 22875     | Trhb3         | tribbles homolog 3 (Drosophila)                                                                                                 | -1.7  | 5.00E-06 |
| 106766    | Stap2         | signal transducing adaptor family member 2                                                                                      | -1.7  | 2.10E-08 |
| 72002     | Slc39a5       | solute carrier family 39 (metal ion transporter), member 5                                                                      | -1.7  | 1.60E-05 |
| 76787     | Ppfia3        | protein tyrosine phosphatase, receptor type, f polypeptide (PTPRF), interacting protein (liprin), alpha 3                       | -1.7  | 3.20E-05 |
| 50708     | Hist1h1c      | histone cluster 1, H1c                                                                                                          | -1.7  | 4.90E-06 |
| 14916     | Guca2b        | guanylate cyclase activator 2b (retina)                                                                                         | -1.7  | 6.50E-06 |
| 66168     | Grina         | glutamate receptor, ionotropic, N-methyl D-aspartate-associated protein 1 (glutamate binding)                                   | -1.7  | 1.50E-05 |
| 170716    | Cyp4f13       | cytochrome P450, family 4, subfamily f, polypeptide 13                                                                          | -1.7  | 1.60E-06 |
| 20238     | Atxa1         | ataxin 1                                                                                                                        | -1.7  | 1.50E-06 |
| 72002     | Slc39a5       | solute carrier family 39 (metal ion transporter), member 5                                                                      | -1.71 | 4.60E-07 |
| 18400     | Slc22a18      | solute carrier family 22 (organic cation transporter), member 18                                                                | -1.71 | 3.10E-08 |
| 20276     | Scnn1a        | sodium channel, nonvoltage-gated 1 alpha                                                                                        | -1.71 | 2.10E-07 |
| 18810     | Plec          | plectin                                                                                                                         | -1.71 | 3.00E-06 |
| 13136     | Cd55          | CD55 antigen                                                                                                                    | -1.71 | 2.20E-05 |
| 54215     | Cd160         | CD160 antigen                                                                                                                   | -1.71 | 0.00018  |
| 22169     | Cmpk2         | cytidine monophosphate (UMP-CMP) kinase 2, mitochondrial                                                                        | -1.72 | 0.00056  |
| 434246    | ILMN_252980   | Mus musculus tripartite motif-containing 72 (Trim72), mRNA.                                                                     | -1.72 | 3.40E-05 |
| 74764     | Klc4          | kinesin light chain 4                                                                                                           | -1.72 | 8.20E-09 |
| 14102     | Fas           | Fas (TNF receptor superfamily member 6)                                                                                         | -1.72 | 1.70E-05 |
| 208659    | Fam20a        | family with sequence similarity 20, member A                                                                                    | -1.72 | 1.70E-07 |
| 11668     | Aldh1a1       | aldehyde dehydrogenase family 1, subfamily A1                                                                                   | -1.72 | 1.80E-05 |
| 66395     | Ahnak         | AHNAK nucleoprotein (desmoyokin)                                                                                                | -1.72 | 1.30E-05 |
| 69864     | 1810065E05Rik | RIKEN cDNA 1810065E05 gene                                                                                                      | -1.72 | 0.00042  |
| 66273     | 1810020D17Rik | RIKEN cDNA 1810020D17 gene                                                                                                      | -1.72 | 1.00E-06 |
| 22695     | Zfp36         | zinc finger protein 36                                                                                                          | -1.73 | 3.00E-07 |
| 22057     | Tob1          | transducer of ErbB-2.1                                                                                                          | -1.73 | 1.30E-06 |
| 380712    | Tlcd2         | TLC domain containing 2                                                                                                         | -1.73 | 0.00018  |
| 72310     | Nkg7          | natural killer cell group 7 sequence                                                                                            | -1.73 | 0.0014   |
| 171095    | Il17rc        | interleukin 17 receptor C                                                                                                       | -1.73 | 2.30E-08 |
| 67133     | Gp2           | glycoprotein 2 (zymogen granule membrane)                                                                                       | -1.73 | 0.0091   |
| 170750    | Xpnppep1      | X-prolyl aminopeptidase (aminopeptidase P) 1, soluble                                                                           | -1.74 | 5.10E-07 |
| 217214    | Nags          | N-acetylglutamate synthase                                                                                                      | -1.74 | 1.30E-06 |
| 100048721 | ILMN_210479   | PREDICTED: Mus musculus similar to fibronectin leucine rich transmembrane protein 3, transcript variant 1 (LOC100048721), mRNA. | -1.74 | 5.50E-06 |
| 16407     | Itgae         | integrin alpha E, epithelial-associated                                                                                         | -1.74 | 7.80E-05 |
| 15212     | Hexb          | hexosaminidase B                                                                                                                | -1.74 | 8.30E-06 |
| 19252     | Dusp1         | dual specificity phosphatase 1                                                                                                  | -1.74 | 0.00012  |
| 74481     | Batf2         | basic leucine zipper transcription factor, ATF-like 2                                                                           | -1.74 | 1.00E-06 |
| 215113    | Slc43a2       | solute carrier family 43, member 2                                                                                              | -1.75 | 1.40E-06 |
| 338365    | Slc41a2       | solute carrier family 41, member 2                                                                                              | -1.75 | 2.50E-06 |
| 20526     | Slc2a2        | solute carrier family 2 (facilitated glucose transporter), member 2                                                             | -1.75 | 2.40E-05 |
| 280408    | Rilp          | Rab interacting lysosomal protein                                                                                               | -1.75 | 1.10E-06 |
| 17380     | Mme           | membrane metallo endopeptidase                                                                                                  | -1.75 | 0.00015  |
| 100047937 | ILMN_219033   | PREDICTED: Mus musculus similar to Aldehyde dehydrogenase 1 family, member L1 (LOC100047937), mRNA.                             | -1.75 | 1.70E-07 |
| 80909     | Gats2         | GATS protein-like 2                                                                                                             | -1.75 | 1.50E-07 |
| 19692     | Reg1          | regenerating islet-derived 1                                                                                                    | -1.76 | 3.70E-05 |
| 14544     | Gda           | guanine deaminase                                                                                                               | -1.76 | 3.60E-05 |
| 99663     | Clca6         | chloride channel calcium activated 6                                                                                            | -1.76 | 0.00062  |
| 109934    | Abr           | active BCR-related gene                                                                                                         | -1.76 | 1.80E-06 |
| 20303     | Ccl4          | chemokine (C-C motif) ligand 4                                                                                                  | -1.77 | 0.0013   |
| 69698     | 2310046K01Rik | RIKEN cDNA 2310046K01 gene                                                                                                      | -1.77 | 1.90E-07 |
| 29813     | Zfp385a       | zinc finger protein 385A                                                                                                        | -1.78 | 1.20E-05 |
| 27219     | Sgk2          | serum/glucocorticoid regulated kinase 2                                                                                         | -1.78 | 0.00035  |
| 19267     | Ptpre         | protein tyrosine phosphatase, receptor type, E                                                                                  | -1.78 | 1.10E-06 |
| 15486     | Hsd17b2       | hydroxysteroid (17-beta) dehydrogenase 2                                                                                        | -1.78 | 8.20E-06 |
| 14127     | Fcer1g        | Fc receptor, IgE, high affinity I, gamma polypeptide                                                                            | -1.78 | 0.00091  |
| 14311     | Cidec         | cell death-inducing DFFA-like effector c                                                                                        | -1.78 | 0.00034  |
| 11472     | Actn2         | actinin alpha 2                                                                                                                 | -1.78 | 1.50E-06 |
| 19193     | Pipox         | pipecolic acid oxidase                                                                                                          | -1.79 | 2.70E-07 |
| 16168     | Il15          | interleukin 15                                                                                                                  | -1.79 | 1.50E-07 |
| 235674    | Acaa1b        | acetyl-Coenzyme A acyltransferase 1B                                                                                            | -1.79 | 9.00E-08 |
| 239393    | Lrp12         | low density lipoprotein-related protein 12                                                                                      | -1.8  | 1.00E-06 |
| 14469     | Gbp2          | guanylate binding protein 2                                                                                                     | -1.8  | 0.00078  |
| 11732     | Ank           | progressive ankylosis                                                                                                           | -1.8  | 1.80E-06 |
| 319848    | Slc17a4       | solute carrier family 17 (sodium phosphate), member 4                                                                           | -1.81 | 9.60E-06 |
| 18604     | Pdk2          | pyruvate dehydrogenase kinase, isoenzyme 2                                                                                      | -1.81 | 1.80E-07 |
| 23954     | Nek3          | NIMA (never in mitosis gene a)-related expressed kinase 3                                                                       | -1.81 | 7.00E-08 |
| 223646    | Naprt1        | nicotinate phosphoribosyltransferase domain containing 1                                                                        | -1.81 | 4.40E-05 |
| 171095    | Il17rc        | interleukin 17 receptor C                                                                                                       | -1.81 | 5.10E-07 |
| 104086    | Cyp27a1       | cytochrome P450, family 27, subfamily a, polypeptide 1                                                                          | -1.81 | 1.50E-06 |
| 26358     | Aldh1a7       | aldehyde dehydrogenase family 1, subfamily A7                                                                                   | -1.81 | 2.30E-05 |
| 20280     | Scp2          | sterol carrier protein 2, liver                                                                                                 | -1.82 | 6.90E-07 |
| 217166    | Nr1d1         | nuclear receptor subfamily 1, group D, member 1                                                                                 | -1.82 | 6.50E-06 |
| 16643     | Klrd1         | killer cell lectin-like receptor, subfamily D, member 1                                                                         | -1.82 | 5.00E-04 |
| 231932    | Gimap7        | GTPase, IMAP family member 7                                                                                                    | -1.82 | 2.00E-05 |
| 14199     | Fhl1          | four and a half LIM domains 1                                                                                                   | -1.82 | 0.0014   |
| 13142     | Dao           | D-amino acid oxidase                                                                                                            | -1.82 | 7.00E-08 |
| 28105     | Trim36        | tripartite motif-containing 36                                                                                                  | -1.83 | 3.90E-07 |
| 18489     | Reg3b         | regenerating islet-derived 3 beta                                                                                               | -1.83 | 0.016    |
| 14672     | Gna11         | guanine nucleotide binding protein, alpha 11                                                                                    | -1.83 | 2.20E-07 |
| 76051     | ILMN_221992   | Mus musculus glucosidase, alpha; neutral C (Ganc), mRNA.                                                                        | -1.83 | 1.20E-05 |
| 13179     | Dcn           | decorin                                                                                                                         | -1.83 | 0.016    |
| 13101     | Cyp2d10       | cytochrome P450, family 2, subfamily d, polypeptide 10                                                                          | -1.83 | 1.80E-05 |
| 268860    | Abat          | 4-aminobutyrate aminotransferase                                                                                                | -1.83 | 2.10E-07 |
| 13730     | Emp1          | epithelial membrane protein 1                                                                                                   | -1.84 | 0.00025  |
| 12945     | Dmbt1         | deleted in malignant brain tumors 1                                                                                             | -1.84 | 0.00022  |
| 212070    | Clm3          | clarin 3                                                                                                                        | -1.84 | 1.60E-06 |
| 12724     | Clcn2         | chloride channel 2                                                                                                              | -1.84 | 1.80E-08 |
| 195359    | ILMN_235792   | Mus musculus tripartite motif-containing 40 (Trim40), mRNA.                                                                     | -1.85 | 2.90E-07 |
| 68024     | Hist1h2bc     | histone cluster 1, H2bc                                                                                                         | -1.85 | 4.20E-06 |
| 15040     | ILMN_196750   | Mus musculus histocompatibility 2, T region locus 23 (H2-T23), mRNA.                                                            | -1.85 | 0.00048  |
| 13821     | Epb4.111      | erythrocyte protein band 4.1-like 1                                                                                             | -1.85 | 8.20E-07 |
| 12501     | Cd3e          | CD3 antigen, epsilon polypeptide                                                                                                | -1.85 | 0.00027  |
| 236576    | Spry3         | sprouty homolog 3 (Drosophila)                                                                                                  | -1.86 | 2.50E-07 |
| 209086    | Samd9l        | sterile alpha motif domain containing 9-like                                                                                    | -1.86 | 9.00E-05 |
| 18799     | Plec1         | phospholipase C, delta 1                                                                                                        | -1.86 | 1.00E-06 |
| 213019    | Pdlim2        | PDZ and LIM domain 2                                                                                                            | -1.86 | 0.0015   |
| 22259     | Nr1h3         | nuclear receptor subfamily 1, group H, member 3                                                                                 | -1.86 | 4.00E-09 |
| 13041     | Ctsw          | cathepsin W                                                                                                                     | -1.86 | 6.20E-05 |
| 20304     | Ccl5          | chemokine (C-C motif) ligand 5                                                                                                  | -1.86 | 0.0074   |
| 20540     | Slc7a7        | solute carrier family 7 (cationic amino acid transporter, y+ system), member 7                                                  | -1.87 | 3.80E-05 |
| 231147    | Sh3tc1        | SH3 domain and tetratricopeptide repeats 1                                                                                      | -1.87 | 2.10E-06 |
| 20393     | Sgk1          | serum/glucocorticoid regulated kinase 1                                                                                         | -1.87 | 0.00065  |
| 19260     | Ptpn22        | protein tyrosine phosphatase, non-receptor type 22 (lymphoid)                                                                   | -1.87 | 6.90E-07 |

|           |               |                                                                                                                  |       |          |
|-----------|---------------|------------------------------------------------------------------------------------------------------------------|-------|----------|
| 13113     | Cyp3a13       | cytochrome P450, family 3, subfamily a, polypeptide 13                                                           | -1.87 | 0.00013  |
| 65256     | Asb2          | ankyrin repeat and SOCS box-containing 2                                                                         | -1.87 | 2.00E-04 |
| 268482    | ILMN_217740   | Mus musculus keratin 12 (Krt12), mRNA.                                                                           | -1.88 | 2.50E-06 |
| 100047937 | ILMN_219033   | PREDICTED: Mus musculus similar to Aldehyde dehydrogenase 1 family, member L1 (LOC100047937), mRNA.              | -1.89 | 1.10E-08 |
| 232889    | Pla2g4c       | phospholipase A2, group IVC (cytosolic, calcium-independent)                                                     | -1.9  | 0.034    |
| 227929    | Cytip         | cytohesin 1 interacting protein                                                                                  | -1.9  | 1.50E-07 |
| 12521     | Cd82          | CD82 antigen                                                                                                     | -1.9  | 4.70E-09 |
| 12424     | Cck           | cholecystokinin                                                                                                  | -1.9  | 6.70E-06 |
| 215210    | Tmem120a      | transmembrane protein 120A                                                                                       | -1.91 | 2.10E-09 |
| 15446     | Hpgd          | hydroxyprostaglandin dehydrogenase 15 (NAD)                                                                      | -1.91 | 1.40E-05 |
| 23833     | Cd52          | CD52 antigen                                                                                                     | -1.91 | 0.00038  |
| 213019    | Pdlim2        | PDZ and LIM domain 2                                                                                             | -1.92 | 3.10E-05 |
| 99031     | Osbpl6        | oxysterol binding protein-like 6                                                                                 | -1.92 | 2.80E-08 |
| 13112     | Cyp3a11       | cytochrome P450, family 3, subfamily a, polypeptide 11                                                           | -1.92 | 0.00028  |
| 11803     | Aplp1         | amyloid beta (A4) precursor-like protein 1                                                                       | -1.92 | 8.10E-06 |
| 69083     | Sult1c2       | sulfotransferase family, cytosolic, 1C, member 2                                                                 | -1.93 | 8.20E-07 |
| 100045343 | ILMN_211693   | PREDICTED: Mus musculus similar to CDNA sequence BC046404 (LOC100045343), misc RNA.                              | -1.93 | 5.10E-07 |
| 16168     | Ili5          | interleukin 15                                                                                                   | -1.93 | 1.50E-06 |
| 26384     | Gnpd1         | glucosamine-6-phosphate deaminase 1                                                                              | -1.93 | 2.40E-06 |
| 11690     | Alox5ap       | arachidonate 5-lipoxygenase activating protein                                                                   | -1.93 | 0.00027  |
| 217845    | Ifi2712b      | interferon, alpha-inducible protein 27 like 2B                                                                   | -1.93 | 0.00081  |
| 20397     | Sgpl1         | sphingosine phosphatase lyase 1                                                                                  | -1.94 | 5.40E-07 |
| 20280     | Scp2          | sterol carrier protein 2, liver                                                                                  | -1.94 | 1.70E-07 |
| 258458    | Olfir165      | olfactory receptor 165                                                                                           | -1.94 | 8.20E-07 |
| 19279     | Ptpr          | protein tyrosine phosphatase, receptor type, R                                                                   | -1.95 | 1.60E-05 |
| 432516    | Myo1a         | myosin IA                                                                                                        | -1.95 | 1.70E-07 |
| 14132     | Fcgr          | Fc receptor, IgG, alpha chain transporter                                                                        | -1.95 | 1.00E-06 |
| 208647    | Creb3l2       | cAMP responsive element binding protein 3-like 2                                                                 | -1.95 | 1.00E-07 |
| 15203     | Heph          | hephaestin                                                                                                       | -1.96 | 4.90E-06 |
| 619301    | G630016D24Rik | RIKEN cDNA G630016D24 gene                                                                                       | -1.96 | 1.30E-07 |
| 102371    | Gcom1         | GRINL1A complex locus                                                                                            | -1.96 | 4.20E-06 |
| 69036     | Zg16          | zymogen granule protein 16                                                                                       | -1.96 | 1.80E-05 |
| 217166    | Nrl1d         | nuclear receptor subfamily 1, group D, member 1                                                                  | -1.97 | 7.00E-05 |
| 192976    | ILMN_211693   | Mus musculus cDNA sequence BC046404 (BC046404), mRNA.                                                            | -1.97 | 1.70E-06 |
| 12013     | Bach1         | BTB and CNC homology 1                                                                                           | -1.97 | 2.00E-04 |
| 83672     | ILMN_220695   | Mus musculus synaptotagmin-like 3 (Syt13), transcript variant 1, mRNA.                                           | -1.98 | 2.20E-08 |
| 68659     | Fam198b       | family with sequence similarity 198, member B                                                                    | -1.98 | 2.30E-05 |
| 21929     | Tnfai3        | tumor necrosis factor, alpha-induced protein 3                                                                   | -1.99 | 1.40E-05 |
| 11854     | Rhod          | ras homolog gene family, member D                                                                                | -1.99 | 2.30E-06 |
| 13809     | Enpep         | glutamyl aminopeptidase                                                                                          | -1.99 | 3.20E-06 |
| 224796    | Clic5         | chloride intracellular channel 5                                                                                 | -1.99 | 5.90E-06 |
| 16600     | Klf4          | Kruppel-like factor 4 (gut)                                                                                      | -2    | 9.80E-07 |
| 14598     | Ggt1          | gamma-glutamyltransferase 1                                                                                      | -2    | 9.70E-06 |
| 13216     | ILMN_196581   | Mus musculus defensin, alpha 1 (Defa1), mRNA.                                                                    | -2    | 1.60E-05 |
| 245038    | Dclk3         | doublecortin-like kinase 3                                                                                       | -2    | 1.20E-07 |
| 230576    | Ttc22         | tetratricopeptide repeat domain 22                                                                               | -2.01 | 3.10E-07 |
| 16407     | Itgae         | integrin alpha E, epithelial-associated                                                                          | -2.01 | 2.00E-04 |
| 381175    | Ccdc68        | coiled-coil domain containing 68                                                                                 | -2.01 | 1.80E-05 |
| 233836    | Slc5a11       | solute carrier family 5 (sodium/glucose cotransporter), member 11                                                | -2.02 | 3.60E-06 |
| 226781    | Slc30a10      | solute carrier family 30, member 10                                                                              | -2.03 | 0.00086  |
| 19012     | Ppap2a        | phosphatidic acid phosphatase type 2A                                                                            | -2.03 | 1.00E-06 |
| 225913    | Dak           | dihydroxyacetone kinase 2 homolog (yeast)                                                                        | -2.03 | 3.00E-05 |
| 230088    | B230312A22Rik | RIKEN cDNA B230312A22 gene                                                                                       | -2.03 | 2.90E-07 |
| 67689     | Aldh3b1       | aldehyde dehydrogenase 3 family, member B1                                                                       | -2.03 | 1.60E-06 |
| 19329     | ILMN_215232   | Mus musculus RAB17, member RAS oncogene family (Rab17), mRNA.                                                    | -2.04 | 2.50E-05 |
| 217212    | Pyy           | peptide YY                                                                                                       | -2.04 | 3.20E-07 |
| 547253    | Parp14        | poly (ADP-ribose) polymerase family, member 14                                                                   | -2.04 | 3.40E-05 |
| 69146     | Gsdmd         | gasdermin D                                                                                                      | -2.04 | 8.20E-06 |
| 319625    | Galm          | galactose mutarotase                                                                                             | -2.04 | 8.80E-08 |
| 13216     | ILMN_196581   | Mus musculus defensin, alpha 1 (Defa1), mRNA.                                                                    | -2.04 | 2.30E-05 |
| 170752    | Bco2          | beta-carotene oxygenase 2                                                                                        | -2.05 | 6.60E-06 |
| 16173     | Il18          | interleukin 18                                                                                                   | -2.06 | 5.10E-05 |
| 69146     | Gsdmd         | gasdermin D                                                                                                      | -2.06 | 2.80E-06 |
| 66822     | Fbxo25        | F-box protein 25                                                                                                 | -2.06 | 4.40E-07 |
| 104086    | Cyp27a1       | cytochrome P450, family 27, subfamily a, polypeptide 1                                                           | -2.06 | 5.30E-06 |
| 104086    | Cyp27a1       | cytochrome P450, family 27, subfamily a, polypeptide 1                                                           | -2.06 | 4.30E-08 |
| 74190     | 1200009106Rik | RIKEN cDNA 1200009106 gene                                                                                       | -2.06 | 2.20E-06 |
| 13026     | Pcyta1        | phosphate cytidylyltransferase 1, choline, alpha isoform                                                         | -2.07 | 6.60E-07 |
| 231510    | ILMN_189297   | Mus musculus 1-acylglycerol-3-phosphate O-acyltransferase 9 (Agpat9), transcript variant 1, mRNA.                | -2.07 | 1.90E-06 |
| 13170     | Dbp           | D site albumin promoter binding protein                                                                          | -2.08 | 0.044    |
| 93694     | Clec2d        | C-type lectin domain family 2, member d                                                                          | -2.08 | 8.20E-07 |
| 11421     | Ace           | angiotensin I converting enzyme (peptidyl-dipeptidase A) 1                                                       | -2.08 | 8.80E-07 |
| 75604     | Tm4sf5        | transmembrane 4 superfamily member 5                                                                             | -2.09 | 0.00015  |
| 240055    | Neur11b       | neuronalized homolog 1b (Drosophila)                                                                             | -2.09 | 3.20E-08 |
| 69146     | Gsdmd         | gasdermin D                                                                                                      | -2.1  | 1.90E-06 |
| 231821    | Adap1         | ArfGAP with dual PH domains 1                                                                                    | -2.1  | 5.60E-08 |
| 53880     | ILMN_230036   | Mus musculus NLR family, apoptosis inhibitory protein 7 (Nai7), mRNA.                                            | -2.11 | 9.70E-08 |
| 71664     | Mettl7b       | methyltransferase like 7B                                                                                        | -2.11 | 5.70E-06 |
| 243813    | Leng9         | leukocyte receptor cluster (LRC) member 9                                                                        | -2.11 | 6.60E-06 |
| 381246    | Xkr9          | X Kell blood group precursor related family member 9 homolog                                                     | -2.12 | 1.50E-07 |
| 228980    | Taf4a         | TAF4A RNA polymerase II, TATA box binding protein (TBP)-associated factor                                        | -2.12 | 2.10E-06 |
| 20540     | Slc7a7        | solute carrier family 7 (cationic amino acid transporter, y+ system), member 7                                   | -2.12 | 1.80E-06 |
| 330064    | Slc5a6        | solute carrier family 5 (sodium-dependent vitamin transporter), member 6                                         | -2.12 | 5.60E-08 |
| 217721    | Mfsd7c        | major facilitator superfamily domain containing 7C                                                               | -2.12 | 1.60E-06 |
| 16419     | Irgb5         | integrin beta 5                                                                                                  | -2.12 | 1.20E-05 |
| 20568     | Slpi          | secretory leukocyte peptidase inhibitor                                                                          | -2.13 | 0.004    |
| 19116     | Prlr          | prolactin receptor                                                                                               | -2.13 | 3.70E-07 |
| 68591     | Mocos         | molybdenum cofactor sulfuryase                                                                                   | -2.13 | 1.70E-06 |
| 76279     | Cyp2d26       | cytochrome P450, family 2, subfamily d, polypeptide 26                                                           | -2.13 | 0.00012  |
| 70261     | 2010110P09Rik | RIKEN cDNA 2010110P09 gene                                                                                       | -2.13 | 6.60E-06 |
| 20312     | Cx3cl1        | chemokine (C-X3-C motif) ligand 1                                                                                | -2.14 | 2.40E-06 |
| 320709    | Tmem117       | transmembrane protein 117                                                                                        | -2.15 | 4.90E-05 |
| 99586     | Dpyd          | dihydropyrimidine dehydrogenase                                                                                  | -2.15 | 8.90E-07 |
| 67800     | Dgat2         | diacylglycerol O-acyltransferase 2                                                                               | -2.15 | 3.80E-06 |
| 239393    | Lrp12         | low density lipoprotein-related protein 12                                                                       | -2.16 | 6.00E-07 |
| 57319     | Smpd13a       | sphingomyelin phosphodiesterase, acid-like 3A                                                                    | -2.17 | 4.20E-06 |
| 230163    | Aldob         | aldolase B, fructose-bisphosphate                                                                                | -2.18 | 1.10E-05 |
| 68846     | Rnf208        | ring finger protein 208                                                                                          | -2.19 | 1.10E-05 |
| 71648     | ILMN_216896   | Mus musculus optineurin (Optn), mRNA.                                                                            | -2.19 | 2.90E-07 |
| 12502     | Cd3g          | CD3 antigen, gamma polypeptide                                                                                   | -2.19 | 5.00E-05 |
| 66895     | 1300014I06Rik | RIKEN cDNA 1300014I06 gene                                                                                       | -2.19 | 4.90E-07 |
| 268480    | Rapgef1       | Rap guanine nucleotide exchange factor (GEF)-like 1                                                              | -2.2  | 6.90E-08 |
| 270198    | Pikfb4        | 6-phosphofructo-2-kinase/fructose-2,6-bisphosphatase 4                                                           | -2.2  | 5.10E-08 |
| 66054     | Cndp2         | CNDP dipeptidase 2 (metallopeptidase M20 family)                                                                 | -2.2  | 6.90E-08 |
| 20510     | Slc1a1        | solute carrier family 1 (neuronal/epithelial high affinity glutamate transporter, system Xag), member 1          | -2.21 | 6.30E-08 |
| 26456     | Sema4g        | sema domain, immunoglobulin domain (Ig), transmembrane domain (TM) and short cytoplasmic domain, (semaphorin) 4G | -2.21 | 6.00E-07 |
| 58210     | Sectm1b       | secreted and transmembrane 1B                                                                                    | -2.21 | 5.30E-05 |
| 19017     | Pparg1a       | peroxisome proliferative activated receptor, gamma, coactivator 1 alpha                                          | -2.21 | 1.90E-06 |
| 223646    | Naprt1        | nicotinate phosphoribosyltransferase domain containing 1                                                         | -2.21 | 9.00E-08 |
| 320415    | Gchfr         | GTP cyclohydrolase I feedback regulator                                                                          | -2.21 | 2.20E-07 |
| 13113     | Cyp3a13       | cytochrome P450, family 3, subfamily a, polypeptide 13                                                           | -2.21 | 4.20E-05 |
| 76279     | Cyp2d26       | cytochrome P450, family 2, subfamily d, polypeptide 26                                                           | -2.21 | 1.00E-04 |
| 66469     | 2810405K02Rik | RIKEN cDNA 2810405K02 gene                                                                                       | -2.21 | 2.90E-07 |
| 209387    | Trim30d       | tripartite motif-containing 30D                                                                                  | -2.22 | 7.30E-07 |
| 50934     | Slc7a8        | solute carrier family 7 (cationic amino acid transporter, y+ system), member 8                                   | -2.23 | 3.30E-07 |
| 545156    | Kalm          | kalinin, RhoGEF kinase                                                                                           | -2.23 | 2.70E-06 |
| 76279     | Cyp2d26       | cytochrome P450, family 2, subfamily d, polypeptide 26                                                           | -2.24 | 0.00012  |

|        |               |                                                                                                          |       |          |
|--------|---------------|----------------------------------------------------------------------------------------------------------|-------|----------|
| 54200  | Sult2b1       | sulfotransferase family, cytosolic, 2B, member 1                                                         | -2.25 | 6.90E-08 |
| 66222  | Serpinb1a     | serine (or cysteine) peptidase inhibitor, clade B, member 1a                                             | -2.25 | 2.20E-07 |
| 13120  | Cyp4b1        | cytochrome P450, family 4, subfamily b, polypeptide 1                                                    | -2.25 | 2.10E-07 |
| 213019 | Pdlim2        | PDZ and LIM domain 2                                                                                     | -2.26 | 2.80E-06 |
| 56209  | Gde1          | glycerophosphodiester phosphodiesterase 1                                                                | -2.26 | 4.10E-08 |
| 11832  | Aqp7          | aquaporin 7                                                                                              | -2.26 | 5.90E-06 |
| 74190  | 1200009I06Rik | RIKEN cDNA 1200009I06 gene                                                                               | -2.26 | 5.20E-08 |
| 71648  | ILMN_216896   | Mus musculus optineurin (Optn), mRNA.                                                                    | -2.27 | 1.10E-07 |
| 16600  | Klf4          | Kruppel-like factor 4 (gut)                                                                              | -2.27 | 1.00E-06 |
| 11522  | Adh1          | alcohol dehydrogenase 1 (class I)                                                                        | -2.28 | 1.10E-05 |
| 76263  | Gstk1         | glutathione S-transferase kappa 1                                                                        | -2.29 | 3.90E-09 |
| 235283 | Gramd1b       | GRAM domain containing 1B                                                                                | -2.29 | 3.10E-08 |
| 70113  | Odf3b         | outer dense fiber of sperm tails 3B                                                                      | -2.29 | 3.90E-09 |
| 20698  | Sphk1         | sphingosine kinase 1                                                                                     | -2.3  | 3.20E-07 |
| 20397  | Sgpl1         | sphingosine phosphate lyase 1                                                                            | -2.3  | 5.00E-08 |
| 381122 | Capn13        | calpain 13                                                                                               | -2.3  | 1.70E-05 |
| 547431 | Btnl2         | butyrophilin-like 2                                                                                      | -2.3  | 3.70E-07 |
| 93835  | Amn           | amionless                                                                                                | -2.31 | 1.40E-05 |
| 99709  | A1747448      | expressed sequence A1747448                                                                              | -2.31 | 0.0039   |
| 109218 | Tmem139       | transmembrane protein 139                                                                                | -2.32 | 1.30E-07 |
| 30805  | Slc22a4       | solute carrier family 22 (organic cation transporter), member 4                                          | -2.32 | 1.00E-07 |
| 68636  | Fahd1         | fumarylacetoacetate hydrolase domain containing 1                                                        | -2.32 | 7.00E-08 |
| 56209  | Gde1          | glycerophosphodiester phosphodiesterase 1                                                                | -2.33 | 1.10E-07 |
| 54722  | Dfna5         | deafness, autosomal dominant 5 (human)                                                                   | -2.33 | 1.80E-06 |
| 328059 | Slc7a15       | solute carrier family 7 (cationic amino acid transporter, y+ system), member 15                          | -2.34 | 4.60E-05 |
| 268663 | Cdhr2         | cadherin-related family member 2                                                                         | -2.34 | 1.00E-06 |
| 224762 | Trim31        | tripartite motif-containing 31                                                                           | -2.35 | 1.60E-07 |
| 64452  | Slc5a4a       | solute carrier family 5, member 4a                                                                       | -2.36 | 3.40E-07 |
| 50778  | Rgs1          | regulator of G-protein signaling 1                                                                       | -2.38 | 6.60E-06 |
| 270328 | ILMN_196360   | Mus musculus gasdermin C3 (Gsdmc3), mRNA.                                                                | -2.38 | 3.60E-05 |
| 21452  | Tcn2          | transcobalamin 2                                                                                         | -2.39 | 5.10E-07 |
| 268663 | Cdhr2         | cadherin-related family member 2                                                                         | -2.39 | 4.90E-07 |
| 11421  | Ace           | angiotensin I converting enzyme (peptidyl-dipeptidase A) 1                                               | -2.39 | 1.60E-06 |
| 16204  | Fabp6         | fatty acid binding protein 6, ileal (gastrotropin)                                                       | -2.4  | 0.002    |
| 102857 | Slc6a8        | solute carrier family 6 (neurotransmitter transporter, creatine), member 8                               | -2.41 | 1.80E-06 |
| 67131  | Acbd4         | acyl-Coenzyme A binding domain containing 4                                                              | -2.41 | 1.30E-08 |
| 69826  | Msd410        | membrane-spanning 4-domains, subfamily A, member 10                                                      | -2.42 | 3.00E-06 |
| 75541  | 1700019G17Rik | RIKEN cDNA 1700019G17 gene                                                                               | -2.42 | 2.50E-07 |
| 20604  | Sst           | somatostatin                                                                                             | -2.43 | 6.20E-06 |
| 19012  | Ppap2a        | phosphatidic acid phosphatase type 2A                                                                    | -2.43 | 1.30E-08 |
| 12263  | C2            | complement component 2 (within H-2S)                                                                     | -2.43 | 9.40E-05 |
| 52793  | Fam3b         | family with sequence similarity 3, member B                                                              | -2.44 | 2.40E-07 |
| 15013  | H2-Q2         | histocompatibility 2, Q region locus 2                                                                   | -2.44 | 4.60E-06 |
| 12632  | Cfl2          | cofilin 2, muscle                                                                                        | -2.44 | 1.50E-05 |
| 56209  | Gde1          | glycerophosphodiester phosphodiesterase 1                                                                | -2.45 | 9.00E-08 |
| 218454 | Lhfp12        | lipoma HMGIC fusion partner-like 2                                                                       | -2.45 | 1.30E-06 |
| 544963 | Iqgap2        | IQ motif containing GTPase activating protein 2                                                          | -2.45 | 3.60E-07 |
| 67131  | Acbd4         | acyl-Coenzyme A binding domain containing 4                                                              | -2.45 | 4.50E-07 |
| 11666  | Abcd1         | ATP-binding cassette, sub-family D (ALD), member 1                                                       | -2.45 | 1.80E-07 |
| 26941  | Slc9a3r1      | solute carrier family 9 (sodium/hydrogen exchanger), member 3 regulator 1                                | -2.46 | 1.50E-07 |
| 13350  | Dgat1         | diacylglycerol O-acyltransferase 1                                                                       | -2.46 | 7.10E-08 |
| 64385  | Cyp4f14       | cytochrome P450, family 4, subfamily f, polypeptide 14                                                   | -2.46 | 5.00E-06 |
| 67038  | 2010109I03Rik | RIKEN cDNA 2010109I03 gene                                                                               | -2.48 | 2.00E-04 |
| 170761 | Pdzd3         | PDZ domain containing 3                                                                                  | -2.49 | 6.00E-07 |
| 217214 | Nags          | N-acetylglutamate synthase                                                                               | -2.49 | 1.90E-08 |
| 13139  | Dgka          | diacylglycerol kinase, alpha                                                                             | -2.49 | 1.50E-08 |
| 13139  | Dgka          | diacylglycerol kinase, alpha                                                                             | -2.49 | 3.90E-09 |
| 545288 | Cyp2c67       | cytochrome P450, family 2, subfamily c, polypeptide 67                                                   | -2.49 | 5.70E-07 |
| 17288  | Mep1b         | meprin 1 beta                                                                                            | -2.51 | 4.90E-05 |
| 268663 | Cdhr2         | cadherin-related family member 2                                                                         | -2.51 | 5.30E-06 |
| 20510  | Slc1a1        | solute carrier family 1 (neuronal/epithelial high affinity glutamate transporter, system Xag), member 1  | -2.52 | 8.10E-09 |
| 17524  | Mpp1          | membrane protein, palmitoylated                                                                          | -2.52 | 8.00E-07 |
| 69574  | Cimbl         | carboxymethylglutaminase-like (Pseudomonas)                                                              | -2.52 | 2.40E-07 |
| 104252 | Cdc42ep2      | CDC42 effector protein (Rho GTPase binding) 2                                                            | -2.52 | 3.60E-07 |
| 434203 | ILMN_244381   | Mus musculus solute carrier family 28 (sodium-coupled nucleoside transporter), member 1 (Slc28a1), mRNA. | -2.55 | 8.50E-07 |
| 18624  | Pepd          | peptidase D                                                                                              | -2.56 | 5.60E-08 |
| 17777  | Mtp           | microsomal triglyceride transfer protein                                                                 | -2.57 | 3.90E-07 |
| 70113  | Odf3b         | outer dense fiber of sperm tails 3B                                                                      | -2.57 | 5.10E-08 |
| 231510 | ILMN_189297   | Mus musculus 1-acylglycerol-3-phosphate O-acyltransferase 9 (Aagpat9), transcript variant 1, mRNA.       | -2.59 | 4.40E-07 |
| 140742 | ILMN_253855   | Mus musculus sestrin 1 (Sesn1), mRNA.                                                                    | -2.6  | 8.90E-07 |
| 19660  | Rbp2          | retinol binding protein 2, cellular                                                                      | -2.6  | 7.00E-06 |
| 632778 | Gm7092        | predicted gene 7092                                                                                      | -2.6  | 1.00E-06 |
| 18947  | Pnlipp2       | pancreatic lipase-related protein 2                                                                      | -2.61 | 0.00017  |
| 223646 | Naprt1        | nicotinate phosphoribosyltransferase domain containing 1                                                 | -2.61 | 2.80E-08 |
| 14377  | G6pc          | glucose-6-phosphatase, catalytic                                                                         | -2.61 | 7.50E-06 |
| 71839  | Osgin1        | oxidative stress induced growth inhibitor 1                                                              | -2.62 | 3.90E-08 |
| 52793  | Fam3b         | family with sequence similarity 3, member B                                                              | -2.62 | 4.20E-08 |
| 232409 | Clec2e        | C-type lectin domain family 2, member e                                                                  | -2.62 | 1.40E-07 |
| 233549 | Mogat2        | monoacylglycerol O-acyltransferase 2                                                                     | -2.63 | 6.30E-07 |
| 69787  | Anxa13        | annexin A13                                                                                              | -2.63 | 2.50E-06 |
| 22436  | Xdh           | xanthine dehydrogenase                                                                                   | -2.64 | 4.40E-07 |
| 18947  | Pnlipp2       | pancreatic lipase-related protein 2                                                                      | -2.64 | 0.00014  |
| 268480 | Rapgef1l      | Rap guanine nucleotide exchange factor (GEF)-like 1                                                      | -2.65 | 8.50E-07 |
| 381334 | ILMN_196607   | Mus musculus galactose-3-O-sulfotransferase 2 (Gal3st2), mRNA.                                           | -2.65 | 5.70E-07 |
| 24108  | Ubd           | ubiquitin D                                                                                              | -2.66 | 0.0045   |
| 26569  | Slc27a4       | solute carrier family 27 (fatty acid transporter), member 4                                              | -2.66 | 2.10E-07 |
| 54200  | Sult2b1       | sulfotransferase family, cytosolic, 2B, member 1                                                         | -2.67 | 3.90E-09 |
| 20459  | Ptk6          | PTK6 protein tyrosine kinase 6                                                                           | -2.67 | 4.40E-07 |
| 93842  | Igsf9         | immunoglobulin superfamily, member 9                                                                     | -2.67 | 4.20E-08 |
| 67389  | Fam132a       | family with sequence similarity 132, member A                                                            | -2.67 | 3.00E-09 |
| 213522 | Plekhhg6      | pleckstrin homology domain containing, family G (with RhoGef domain) member 6                            | -2.68 | 7.30E-08 |
| 17951  | Naip5         | NLR family, apoptosis inhibitory protein 5                                                               | -2.68 | 7.50E-09 |
| 226564 | Fmo4          | flavin containing monooxygenase 4                                                                        | -2.68 | 8.50E-08 |
| 14102  | Fas           | Fas (TNF receptor superfamily member 6)                                                                  | -2.69 | 4.30E-08 |
| 241303 | ILMN_210026   | Mus musculus RIKEN cDNA A130092J06 gene (A130092J06Rik), mRNA.                                           | -2.69 | 2.90E-07 |
| 107589 | Mylk          | myosin, light polypeptide kinase                                                                         | -2.7  | 1.30E-06 |
| 13370  | Dio1          | deiodinase, iodothyronine, type I                                                                        | -2.7  | 1.20E-07 |
| 67470  | ILMN_213808   | Mus musculus ATP-binding cassette, sub-family G (WHITE), member 8 (Abcg8), mRNA.                         | -2.7  | 2.30E-07 |
| 223631 | ILMN_209571   | Mus musculus cDNA sequence BC025446 (BC025446), mRNA.                                                    | -2.71 | 4.90E-07 |
| 68947  | Chst8         | carbohydrate (N-acetylgalactosamine 4-0) sulfotransferase 8                                              | -2.72 | 4.90E-07 |
| 223920 | Soat2         | sterol O-acyltransferase 2                                                                               | -2.73 | 0.00014  |
| 26384  | ILMN_226523   | Mus musculus glucosamine-6-phosphate deaminase 1 (Gnpd1), mRNA.                                          | -2.73 | 3.80E-08 |
| 12684  | Cideb         | cell death-inducing DNA fragmentation factor, alpha subunit-like effector B                              | -2.73 | 2.00E-08 |
| 13482  | Dpp4          | dipeptidylpeptidase 4                                                                                    | -2.74 | 6.30E-08 |
| 228576 | Mall          | mal, T-cell differentiation protein-like                                                                 | -2.75 | 1.30E-07 |
| 76282  | Gpt           | glutamic pyruvic transaminase, soluble                                                                   | -2.75 | 2.50E-06 |
| 22264  | Prap1         | proline-rich acidic protein 1                                                                            | -2.76 | 0.0027   |
| 11806  | Apoa1         | apolipoprotein A-I                                                                                       | -2.76 | 0.031    |
| 13088  | Cyp2b10       | cytochrome P450, family 2, subfamily b, polypeptide 10                                                   | -2.77 | 0.001    |
| 11522  | Adh1          | alcohol dehydrogenase 1 (class I)                                                                        | -2.77 | 2.80E-06 |
| 231396 | Ugr2b36       | UDP glucuronosyltransferase 2 family, polypeptide B36                                                    | -2.78 | 9.00E-08 |
| 233549 | Mogat2        | monoacylglycerol O-acyltransferase 2                                                                     | -2.78 | 1.40E-05 |
| 17288  | Mep1b         | meprin 1 beta                                                                                            | -2.78 | 0.00015  |
| 27409  | Abcg5         | ATP-binding cassette, sub-family G (WHITE), member 5                                                     | -2.78 | 3.00E-07 |
| 24059  | Slco2a1       | solute carrier organic anion transporter family, member 2a1                                              | -2.79 | 4.70E-06 |
| 17965  | Nbl1          | neuroblastoma, suppression of tumorigenicity 1                                                           | -2.79 | 8.20E-09 |
| 68270  | ILMN_218483   | Mus musculus leucine rich repeat containing 50 (Lrrc50), mRNA.                                           | -2.79 | 4.30E-08 |

|        |               |                                                                                                                       |       |          |
|--------|---------------|-----------------------------------------------------------------------------------------------------------------------|-------|----------|
| 192970 | Dhrs11        | dehydrogenase/reductase (SDR family) member 11                                                                        | -2.8  | 2.10E-08 |
| 17289  | Mertk         | c-met proto-oncogene tyrosine kinase                                                                                  | -2.81 | 3.30E-07 |
| 12182  | ILMN_214474   | Mus musculus bone marrow stromal cell antigen 1 (Bst1), mRNA.                                                         | -2.81 | 8.80E-09 |
| 76507  | Abp1          | amiloride binding protein 1 (amine oxidase, copper-containing)                                                        | -2.81 | 3.00E-08 |
| 330962 | Ostb          | organic solute transporter beta                                                                                       | -2.82 | 1.50E-06 |
| 20537  | Slc5a1        | solute carrier family 5 (sodium/glucose cotransporter), member 1                                                      | -2.83 | 3.40E-08 |
| 20730  | Spink3        | serine peptidase inhibitor, Kazal type 3                                                                              | -2.84 | 1.10E-06 |
| 69836  | Pla2g12b      | phospholipase A2, group XIIIB                                                                                         | -2.84 | 4.20E-06 |
| 107589 | Mylk          | myosin, light polypeptide kinase                                                                                      | -2.84 | 2.60E-07 |
| 68255  | Tmem86b       | transmembrane protein 86B                                                                                             | -2.85 | 2.50E-09 |
| 18858  | Pmp22         | peripheral myelin protein 22                                                                                          | -2.85 | 1.90E-06 |
| 13131  | Dab1          | disabled homolog 1 (Drosophila)                                                                                       | -2.85 | 4.90E-10 |
| 208677 | Creb3l3       | cAMP responsive element binding protein 3-like 3                                                                      | -2.86 | 1.80E-06 |
| 223631 | ILMN_209571   | Mus musculus cDNA sequence BC025446 (BC025446), mRNA.                                                                 | -2.86 | 4.30E-08 |
| 70008  | ILMN_215632   | Mus musculus angiotensin I converting enzyme (peptidyl-dipeptidase A) 2 (Ace2), mRNA.                                 | -2.86 | 0.00019  |
| 20300  | Ccl25         | chemokine (C-C motif) ligand 25                                                                                       | -2.88 | 1.00E-06 |
| 12266  | C3            | complement component 3                                                                                                | -2.88 | 0.00037  |
| 66809  | Krt20         | keratin 20                                                                                                            | -2.89 | 3.10E-07 |
| 16002  | Igf2          | insulin-like growth factor 2                                                                                          | -2.89 | 0.00017  |
| 56643  | Slc15a1       | solute carrier family 15 (oligopeptide transporter), member 1                                                         | -2.9  | 5.30E-06 |
| 99663  | Clca6         | chloride channel calcium activated 6                                                                                  | -2.9  | 0.00075  |
| 20300  | ILMN_215623   | Mus musculus chemokine (C-C motif) ligand 25 (Ccl25), mRNA.                                                           | -2.9  | 1.10E-05 |
| 170745 | ILMN_256045   | Mus musculus X-prolyl aminopeptidase (aminopeptidase P) 2, membrane-bound (Xpnpep2), transcript variant 1, mRNA.      | -2.91 | 6.30E-08 |
| 107770 | Tm6sf2        | transmembrane 6 superfamily member 2                                                                                  | -2.92 | 1.20E-07 |
| 56226  | Espn          | espin                                                                                                                 | -2.92 | 2.50E-07 |
| 13479  | Dpep1         | dipeptidase 1 (renal)                                                                                                 | -2.92 | 2.00E-06 |
| 106407 | Osta          | organic solute transporter alpha                                                                                      | -2.93 | 0.00058  |
| 17288  | Mep1b         | meprin 1 beta                                                                                                         | -2.94 | 5.90E-06 |
| 76960  | Beas1         | breast carcinoma amplified sequence 1                                                                                 | -2.96 | 5.80E-10 |
| 74338  | Slc6a19       | solute carrier family 6 (neurotransmitter transporter), member 19                                                     | -2.97 | 1.10E-05 |
| 74134  | Cyp2s1        | cytochrome P450, family 2, subfamily s, polypeptide 1                                                                 | -2.97 | 1.30E-08 |
| 268860 | Abat          | 4-aminobutyrate aminotransferase                                                                                      | -3.01 | 1.10E-07 |
| 67082  | 1700011H14Rik | RIKEN cDNA 1700011H14 gene                                                                                            | -3.01 | 1.30E-07 |
| 381204 | Naalad1l      | N-acetylated alpha-linked acidic dipeptidase-like 1                                                                   | -3.03 | 8.80E-07 |
| 99709  | A1747448      | expressed sequence A1747448                                                                                           | -3.03 | 1.00E-05 |
| 18858  | Pmp22         | peripheral myelin protein 22                                                                                          | -3.04 | 3.60E-06 |
| 16548  | Khk           | ketohekokinase                                                                                                        | -3.04 | 3.90E-08 |
| 72303  | ILMN_229278   | Mus musculus cytochrome P450, family 2, subfamily c, polypeptide 65 (Cyp2c65), mRNA.                                  | -3.04 | 1.60E-06 |
| 216019 | Hkdc1         | hexokinase domain containing 1                                                                                        | -3.05 | 1.80E-07 |
| 63954  | Rbp7          | retinol binding protein 7, cellular                                                                                   | -3.07 | 6.00E-07 |
| 212647 | ILMN_241583   | Mus musculus aldehyde dehydrogenase 4 family, member A1 (Aldh4a1), nuclear gene encoding mitochondrial protein, mRNA. | -3.08 | 1.10E-05 |
| 20526  | Slc2a2        | solute carrier family 2 (facilitated glucose transporter), member 2                                                   | -3.09 | 7.30E-06 |
| 230579 | Fam151a       | family with sequence simliarity 151, member A                                                                         | -3.09 | 5.10E-07 |
| 22271  | Upp1          | uridine phosphorylase 1                                                                                               | -3.1  | 9.30E-05 |
| 234673 | Ces2e         | carboxylesterase 2E                                                                                                   | -3.1  | 6.60E-07 |
| 67307  | Pbld2         | phenazine biosynthesis-like protein domain containing 2                                                               | -3.1  | 8.30E-10 |
| 22271  | Upp1          | uridine phosphorylase 1                                                                                               | -3.12 | 1.50E-05 |
| 71706  | Slc46a3       | solute carrier family 46, member 3                                                                                    | -3.13 | 3.80E-08 |
| 54150  | Rdh7          | retinol dehydrogenase 7                                                                                               | -3.13 | 1.20E-08 |
| 12579  | Cdkn2b        | cyclin-dependent kinase inhibitor 2B (p15, inhibits CDK4)                                                             | -3.13 | 2.30E-08 |
| 54200  | Sult2b1       | sulfotransferase family, cytosolic, 2B, member 1                                                                      | -3.14 | 3.30E-09 |
| 69123  | ILMN_210310   | Mus musculus RIKEN cDNA 1810022C23 gene (1810022C23Rik), mRNA.                                                        | -3.14 | 7.30E-10 |
| 23959  | Nt5e          | 5' nucleotidase, ecto                                                                                                 | -3.15 | 1.70E-05 |
| 13850  | Ephx2         | epoxide hydrolase 2, cytoplasmic                                                                                      | -3.15 | 4.90E-07 |
| 13615  | Edn2          | endothelin 2                                                                                                          | -3.15 | 1.10E-05 |
| 13370  | Dio1          | deiodinase, iodothyronine, type I                                                                                     | -3.15 | 2.10E-08 |
| 665270 | Pib1          | phospholipase B1                                                                                                      | -3.16 | 2.00E-09 |
| 30962  | Slc7a9        | solute carrier family 7 (cationic amino acid transporter, y+ system), member 9                                        | -3.18 | 3.90E-06 |
| 17287  | Mep1a         | meprin 1 alpha                                                                                                        | -3.2  | 1.70E-05 |
| 56226  | Espn          | espin                                                                                                                 | -3.21 | 1.80E-08 |
| 20500  | Slc13a2       | solute carrier family 13 (sodium-dependent dicarboxylate transporter), member 2                                       | -3.22 | 3.20E-06 |
| 381204 | Naalad1l      | N-acetylated alpha-linked acidic dipeptidase-like 1                                                                   | -3.22 | 3.90E-06 |
| 22271  | Upp1          | uridine phosphorylase 1                                                                                               | -3.23 | 2.20E-05 |
| 15930  | Idol          | indoleamine 2,3-dioxygenase 1                                                                                         | -3.23 | 0.00096  |
| 14263  | ILMN_211866   | Mus musculus flavin containing monooxygenase 5 (Fmo5), mRNA.                                                          | -3.23 | 8.20E-09 |
| 71584  | Gdpd2         | glycerophosphodiester phosphodiesterase domain containing 2                                                           | -3.24 | 3.80E-11 |
| 21810  | Tgfb1         | transforming growth factor, beta induced                                                                              | -3.26 | 6.60E-09 |
| 16548  | Khk           | ketohekokinase                                                                                                        | -3.26 | 1.40E-08 |
| 56448  | ILMN_223233   | Mus musculus cytochrome P450, family 2, subfamily d, polypeptide 22 (Cyp2d22), mRNA.                                  | -3.27 | 1.90E-06 |
| 381204 | Naalad1l      | N-acetylated alpha-linked acidic dipeptidase-like 1                                                                   | -3.28 | 2.10E-06 |
| 12351  | Car4          | carbonic anhydrase 4                                                                                                  | -3.29 | 4.30E-08 |
| 231396 | Ugt2b36       | UDP glucuronosyltransferase 2 family, polypeptide B36                                                                 | -3.32 | 3.90E-09 |
| 16790  | Anpep         | alanine (membrane) aminopeptidase                                                                                     | -3.33 | 7.00E-04 |
| 30962  | Slc7a9        | solute carrier family 7 (cationic amino acid transporter, y+ system), member 9                                        | -3.35 | 8.80E-07 |
| 230163 | Aldob         | aldolase B, fructose-bisphosphate                                                                                     | -3.39 | 1.20E-06 |
| 50934  | Slc7a8        | solute carrier family 7 (cationic amino acid transporter, y+ system), member 8                                        | -3.43 | 2.10E-09 |
| 54150  | Rdh7          | retinol dehydrogenase 7                                                                                               | -3.43 | 1.10E-09 |
| 12865  | Cox7a1        | cytochrome c oxidase, subunit VIIa 1                                                                                  | -3.43 | 4.10E-09 |
| 17380  | ILMN_220122   | Mus musculus membrane metallo endopeptidase (Mme), mRNA.                                                              | -3.46 | 2.20E-07 |
| 71601  | ILMN_213888   | Mus musculus CEA-related cell adhesion molecule 20 (Ceacam20), mRNA.                                                  | -3.47 | 2.20E-08 |
| 15567  | Slc6a4        | solute carrier family 6 (neurotransmitter transporter, serotonin), member 4                                           | -3.49 | 8.80E-10 |
| 171429 | ILMN_216189   | Mus musculus solute carrier family 26, member 6 (Slc26a6), mRNA.                                                      | -3.49 | 7.30E-07 |
| 14170  | Fgf15         | fibroblast growth factor 15                                                                                           | -3.54 | 6.90E-08 |
| 67473  | Slc47a1       | solute carrier family 47, member 1                                                                                    | -3.54 | 6.30E-07 |
| 14963  | ILMN_208890   | Mus musculus histocompatibility 2, blastocyst (H2-B1), mRNA.                                                          | -3.56 | 6.30E-08 |
| 67893  | Tmem86a       | transmembrane protein 86A                                                                                             | -3.58 | 3.50E-08 |
| 58866  | Treh          | trehalase (brush-border membrane glycoprotein)                                                                        | -3.59 | 6.70E-06 |
| 71733  | Susd2         | sushi domain containing 2                                                                                             | -3.59 | 6.20E-08 |
| 101488 | Slc2b1        | solute carrier organic anion transporter family, member 2b1                                                           | -3.6  | 1.20E-06 |
| 56388  | Cyp3a25       | cytochrome P450, family 3, subfamily a, polypeptide 25                                                                | -3.66 | 5.90E-08 |
| 23844  | Clca3         | chloride channel calcium activated 3                                                                                  | -3.68 | 2.80E-06 |
| 11808  | Apoa4         | apolipoprotein A-IV                                                                                                   | -3.68 | 0.00048  |
| 20443  | St3gal4       | ST3 beta-galactoside alpha-2,3-sialyltransferase 4                                                                    | -3.7  | 1.30E-08 |
| 170745 | Xpnpep2       | X-prolyl aminopeptidase (aminopeptidase P) 2, membrane-bound                                                          | -3.71 | 5.70E-06 |
| 20531  | Slc34a2       | solute carrier family 34 (sodium phosphate), member 2                                                                 | -3.71 | 5.00E-06 |
| 19694  | Reg3a         | regenerating islet-derived 3 alpha                                                                                    | -3.75 | 4.10E-07 |
| 109731 | Maob          | monoamine oxidase B                                                                                                   | -3.76 | 2.30E-08 |
| 20259  | Scin          | scindurin                                                                                                             | -3.77 | 2.50E-08 |
| 433470 | AA467197      | expressed sequence AA467197                                                                                           | -3.78 | 4.80E-08 |
| 216225 | Slc5a8        | solute carrier family 5 (iodide transporter), member 8                                                                | -3.83 | 9.00E-08 |
| 331063 | Gsdmc2        | gasdermin C2                                                                                                          | -3.84 | 5.70E-07 |
| 53315  | Sult1d1       | sulfotransferase family 1D, member 1                                                                                  | -3.87 | 1.30E-08 |
| 11997  | Akr1b7        | aldo-keto reductase family 1, member B7                                                                               | -3.87 | 1.40E-07 |
| 68396  | Nat8          | N-acetyltransferase 8 (GCN5-related, putative)                                                                        | -3.97 | 3.40E-08 |
| 54447  | Asah2         | N-acylsphingosine amidohydrolase 2                                                                                    | -4.03 | 4.10E-08 |
| 237636 | Npc1l1        | NPC1-like 1                                                                                                           | -4.12 | 2.60E-07 |
| 238011 | Enpp7         | ectonucleotide pyrophosphatase/phosphodiesterase 7                                                                    | -4.14 | 2.50E-08 |
| 64454  | Slc5a4b       | solute carrier family 5 (neutral amino acid transporters, system A), member 4b                                        | -4.18 | 4.20E-11 |
| 331063 | ILMN_196357   | Mus musculus expressed sequence A1987692 (A1987692), mRNA.                                                            | -4.22 | 1.40E-06 |
| 102294 | Cyp4v3        | cytochrome P450, family 4, subfamily v, polypeptide 3                                                                 | -4.3  | 1.80E-06 |
| 107375 | Slc25a45      | solute carrier family 25, member 45                                                                                   | -4.36 | 1.00E-07 |
| 11847  | Arg2          | arginase type II                                                                                                      | -4.37 | 7.00E-08 |
| 20363  | Sepp1         | selenoprotein P, plasma, 1                                                                                            | -4.52 | 1.10E-06 |
| 59020  | Pdzk1         | PDZ domain containing 1                                                                                               | -4.52 | 5.30E-05 |
| 20363  | Sepp1         | selenoprotein P, plasma, 1                                                                                            | -4.58 | 5.40E-07 |
| 238011 | Enpp7         | ectonucleotide pyrophosphatase/phosphodiesterase 7                                                                    | -4.58 | 3.40E-08 |
| 21810  | Tgfb1         | transforming growth factor, beta induced                                                                              | -4.63 | 2.30E-07 |

|           |             |                                                                                     |       |          |
|-----------|-------------|-------------------------------------------------------------------------------------|-------|----------|
| 6983      | Sis         | sucrase isomaltase (alpha-glucosidase)                                              | -4.63 | 8.20E-06 |
| 11814     | Apoc3       | apolipoprotein C-III                                                                | -5.08 | 4.40E-05 |
| 100045250 | ILMN_196357 | PREDICTED: Mus musculus hypothetical protein LOC100045250 (LOC100045250), misc RNA. | -5.14 | 4.60E-07 |
| 13419     | Dnase1      | deoxyribonuclease I                                                                 | -5.97 | 2.30E-08 |

## Supplementary Table S2

Differentially expressed genes ( $|\log\text{FC}| \geq 1$ ,  $q\text{-value} < 0.05$ ) in the colonic epithelium 2 days upon Apc depletion compared to tissue with intact Apc

| ENTREZ    | SYMBOL      | GENENAME                                                                        | logFC | q-value  |
|-----------|-------------|---------------------------------------------------------------------------------|-------|----------|
| 626708    | Defa26      | defensin, alpha, 26                                                             | 2.38  | 5.00E-04 |
| 13218     | Defa-rs1    | defensin, alpha, related sequence 1                                             | 2.34  | 0.028    |
| 68009     | ILMN_196346 | Mus musculus defensin related cryptdin 20 (Defcr20), mRNA.                      | 2.28  | 0.0037   |
| 13239     | ILMN_196558 | Mus musculus defensin related cryptdin 5 (Defcr5), mRNA.                        | 2.11  | 0.026    |
| 68009     | ILMN_196346 | Mus musculus defensin related cryptdin 20 (Defcr20), mRNA.                      | 2.01  | 0.0037   |
| 100044291 | ILMN_221210 | PREDICTED: Mus musculus hypothetical protein LOC100044291 (LOC100044291), mRNA. | 1.99  | 0.016    |
| 17110     | Lyz1        | lysozyme 1                                                                      | 1.88  | 0.0096   |
| 13216     | ILMN_196581 | Mus musculus defensin, alpha 1 (Defa1), mRNA.                                   | 1.86  | 0.016    |
| 13240     | Defa6       | defensin, alpha, 6                                                              | 1.82  | 0.031    |
| 17110     | Lyz1        | lysozyme 1                                                                      | 1.63  | 0.028    |
| 17748     | Mt1         | metallothionein 1                                                               | 1.35  | 0.031    |
| 11551     | ILMN_190996 | Mus musculus adrenergic receptor, alpha 2a (Adra2a), mRNA.                      | 1.28  | 0.026    |
| 23945     | Mgl1        | monoglyceride lipase                                                            | 1.25  | 0.031    |
| 213391    | Rassf4      | Ras association (RalGDS/AF-6) domain family member 4                            | 1.02  | 0.031    |
| 12231     | Btn1a1      | butyrophilin, subfamily 1, member A1                                            | -1.07 | 0.016    |
| 16987     | ILMN_187484 | Mus musculus lanosterol synthase (Lss), mRNA.                                   | -1.12 | 0.016    |
| 64177     | Trpv6       | transient receptor potential cation channel, subfamily V, member 6              | -1.33 | 0.04     |

## Supplementary Table S2

Differentially expressed genes ( $\log_{2}FC \geq 1$ ,  $q\text{-value} < 0.05$ ) in the colonic epithelium 4 days upon Apc depletion compared to tissue with intact Apc

| ENTREZ       | SYMBOL        | GENENAME                                                                                                                                    | logFC | q-value  |
|--------------|---------------|---------------------------------------------------------------------------------------------------------------------------------------------|-------|----------|
| 12709.00     | ILMN_193661   | Mus musculus creatine kinase, brain (Ckb), mRNA.                                                                                            | 3.86  | 2.50E-08 |
| 74186.00     | Ccdc3         | coiled-coil domain containing 3                                                                                                             | 3.17  | 6.40E-10 |
| 20568.00     | Slpi          | secretory leukocyte peptidase inhibitor                                                                                                     | 3.09  | 0.00018  |
| 73710.00     | Tubb2b        | tubulin, beta 2B                                                                                                                            | 3.03  | 2.50E-09 |
| 17329.00     | Cxcl9         | chemokine (C-X-C motif) ligand 9                                                                                                            | 2.89  | 3.80E-05 |
| 66141.00     | Ifitm3        | interferon induced transmembrane protein 3                                                                                                  | 2.86  | 8.10E-08 |
| 15945.00     | ILMN_253583   | Mus musculus chemokine (C-X-C motif) ligand 10 (Cxcl10), mRNA.                                                                              | 2.7   | 0.0024   |
| 213948.00    | Atg9b         | ATG9 autophagy related 9 homolog B (S. cerevisiae)                                                                                          | 2.58  | 1.90E-05 |
| 14969.00     | H2-Eb1        | histocompatibility 2, class II antigen E beta                                                                                               | 2.43  | 0.00014  |
| 14570.00     | Arhgdig       | Rho GDP dissociation inhibitor (GDI) gamma                                                                                                  | 2.42  | 3.10E-07 |
| 15930.00     | Ido1          | indoleamine 2,3-dioxygenase 1                                                                                                               | 2.34  | 0.012    |
| 15937.00     | Ier3          | immediate early response 3                                                                                                                  | 2.22  | 1.70E-07 |
| 16010.00     | Igfbp4        | insulin-like growth factor binding protein 4                                                                                                | 2.21  | 1.30E-06 |
| 26897.00     | ILMN_223756   | Mus musculus acyl-CoA thioesterase 1 (Acot1), mRNA.                                                                                         | 2.21  | 8.00E-06 |
| 19752.00     | Rnase1        | ribonuclease, RNase A family, 1 (pancreatic)                                                                                                | 2.19  | 2.60E-05 |
| 66214.00     | 1190002H23Rik | RIKEN cDNA 1190002H23 gene                                                                                                                  | 2.17  | 0.00017  |
| 100047619.00 | ILMN_219663   | PREDICTED: Mus musculus similar to solute carrier family 7 (cationic amino acid transporter, y+ system), member 5 (LOC100047619), misc RNA. | 2.16  | 9.20E-07 |
| 14160.00     | Lgr5          | leucine rich repeat containing G protein coupled receptor 5                                                                                 | 2.13  | 2.40E-07 |
| 270152.00    | Amica1        | adhesion molecule, interacts with CXADR antigen 1                                                                                           | 2.12  | 1.40E-06 |
| 14609.00     | Gja1          | gap junction protein, alpha 1                                                                                                               | 1.99  | 5.50E-05 |
| 11459.00     | Acta1         | actin, alpha 1, skeletal muscle                                                                                                             | 1.99  | 4.90E-05 |
| 27280.00     | Phlda3        | pleckstrin homology-like domain, family A, member 3                                                                                         | 1.98  | 0.00039  |
| 17218.00     | Mcm5          | minichromosome maintenance deficient 5, cell division cycle 46 (S. cerevisiae)                                                              | 1.97  | 2.80E-08 |
| 16145.00     | Igtp          | interferon gamma induced GTPase                                                                                                             | 1.97  | 0.025    |
| 320685.00    | Dctd          | dCMP deaminase                                                                                                                              | 1.95  | 3.10E-05 |
| 328162.00    | Trmt61a       | tRNA methyltransferase 61 homolog A (S. cerevisiae)                                                                                         | 1.95  | 2.50E-06 |
| 100608.00    | Noc4l         | nucleolar complex associated 4 homolog (S. cerevisiae)                                                                                      | 1.93  | 4.00E-06 |
| 17067.00     | Ly6c1         | lymphocyte antigen 6 complex, locus C1                                                                                                      | 1.93  | 0.00015  |
| 11925.00     | Neurog3       | neurogenin 3                                                                                                                                | 1.88  | 9.30E-06 |
| 72462.00     | Rrp1b         | ribosomal RNA processing 1 homolog B (S. cerevisiae)                                                                                        | 1.87  | 9.80E-07 |
| 13401.00     | Dmwd          | dystrophia myotonica-containing WD repeat motif                                                                                             | 1.87  | 1.70E-07 |
| 30927.00     | Snai3         | snail homolog 3 (Drosophila)                                                                                                                | 1.86  | 2.00E-08 |
| 27280.00     | Phlda3        | pleckstrin homology-like domain, family A, member 3                                                                                         | 1.85  | 0.00019  |
| 14028.00     | Evx1          | even skipped homeotic gene 1 homolog                                                                                                        | 1.85  | 2.70E-07 |
| 68915.00     | Vars2         | valyl-tRNA synthetase 2, mitochondrial (putative)                                                                                           | 1.84  | 1.10E-07 |
| 26897.00     | Acot1         | acyl-CoA thioesterase 1                                                                                                                     | 1.82  | 3.90E-06 |
| 102614.00    | Rpp25         | ribonuclease P 25 subunit (human)                                                                                                           | 1.8   | 4.80E-07 |
| 17216.00     | Mcm2          | minichromosome maintenance deficient 2 mitotin (S. cerevisiae)                                                                              | 1.8   | 5.10E-08 |
| 21677.00     | Tead2         | TEA domain family member 2                                                                                                                  | 1.79  | 1.80E-06 |
| 16673.00     | Krt36         | keratin 36                                                                                                                                  | 1.79  | 6.90E-10 |
| 17173.00     | Ascl2         | achaete-scute complex homolog 2 (Drosophila)                                                                                                | 1.79  | 4.40E-05 |
| 20361.00     | Sema7a        | sema domain, immunoglobulin domain (Ig), and GPI membrane anchor, (semaphorin) 7A                                                           | 1.78  | 1.60E-05 |
| 110749.00    | ILMN_215876   | Mus musculus chromatin assembly factor 1, subunit B (p60) (Chaf1b), mRNA.                                                                   | 1.78  | 3.50E-07 |
| 64406.00     | Sp5           | trans-acting transcription factor 5                                                                                                         | 1.77  | 5.80E-07 |
| 18432.00     | Mybbp1a       | MYB binding protein (P160) 1a                                                                                                               | 1.77  | 7.10E-06 |
| 171212.00    | Galnt10       | UDP-N-acetyl-alpha-D-galactosamine:polypeptide N-acetylgalactosaminyltransferase 10                                                         | 1.76  | 3.90E-08 |
| 18383.00     | Tnfrsf11b     | tumor necrosis factor receptor superfamily, member 11b (osteoprotegerin)                                                                    | 1.75  | 8.50E-06 |
| 100608.00    | ILMN_209940   | Mus musculus nucleolar complex associated 4 homolog (S. cerevisiae) (Noc4l), mRNA.                                                          | 1.75  | 2.20E-06 |
| 69902.00     | Mrt4          | MRT4, mRNA turnover 4, homolog (S. cerevisiae)                                                                                              | 1.75  | 5.60E-07 |
| 15469.00     | Prmt1         | protein arginine N-methyltransferase 1                                                                                                      | 1.75  | 4.80E-07 |
| 18780.00     | Pla2g2a       | phospholipase A2, group IIA (platelets, synovial fluid)                                                                                     | 1.74  | 0.00015  |
| 17215.00     | ILMN_213080   | Mus musculus minichromosome maintenance deficient 3 (S. cerevisiae) (Mcm3), mRNA.                                                           | 1.74  | 2.50E-08 |
| 12505.00     | Cd44          | CD44 antigen                                                                                                                                | 1.74  | 3.60E-06 |
| 51797.00     | Ctps          | cytidine 5'-triphosphate synthase                                                                                                           | 1.73  | 3.20E-06 |
| 22321.00     | Vars          | valyl-tRNA synthetase                                                                                                                       | 1.72  | 6.20E-08 |
| 14961.00     | H2-Ab1        | histocompatibility 2, class II antigen A, beta 1                                                                                            | 1.72  | 0.0022   |
| 22041.00     | Trf           | transferrin                                                                                                                                 | 1.71  | 1.10E-06 |
| 14961.00     | H2-Ab1        | histocompatibility 2, class II antigen A, beta 1                                                                                            | 1.71  | 0.0017   |
| 17865.00     | ILMN_212854   | Mus musculus myeloblastosis oncogene-like 2 (Mybl2), mRNA.                                                                                  | 1.7   | 6.40E-10 |
| 71805.00     | Nup93         | nucleoporin 93                                                                                                                              | 1.69  | 1.70E-06 |
| 14998.00     | ILMN_224639   | Mus musculus histocompatibility 2, class II, locus DMA (H2-DMA), mRNA.                                                                      | 1.69  | 0.0018   |
| 73710.00     | 2410129E14Rik | Mus musculus tubulin, beta 2b (Tubb2b), mRNA.                                                                                               | 1.68  | 1.90E-05 |
| 20810.00     | Srm           | spermidine synthase                                                                                                                         | 1.68  | 5.80E-05 |

|              |             |                                                                                                       |      |          |
|--------------|-------------|-------------------------------------------------------------------------------------------------------|------|----------|
| 208638.00    | ILMN_211336 | Mus musculus solute carrier family 25, member 38 (Slc25a38), mRNA.                                    | 1.67 | 6.20E-08 |
| 17319.00     | Mif         | macrophage migration inhibitory factor                                                                | 1.67 | 2.50E-08 |
| 15894.00     | Icam1       | intercellular adhesion molecule 1                                                                     | 1.67 | 0.00034  |
| 20810.00     | Srm         | spermidine synthase                                                                                   | 1.66 | 2.50E-05 |
| 100340.00    | ILMN_210171 | Mus musculus sphingomyelin phosphodiesterase, acid-like 3B (Smpd3b), mRNA.                            | 1.66 | 1.00E-04 |
| 107272.00    | Psat1       | phosphoserine aminotransferase 1                                                                      | 1.66 | 3.20E-05 |
| 67177.00     | Cdt1        | chromatin licensing and DNA replication factor 1                                                      | 1.66 | 1.50E-06 |
| 16149.00     | Cd74        | CD74 antigen (invariant polypeptide of major histocompatibility complex, class II antigen-associated) | 1.66 | 0.013    |
| 51800.00     | Bok         | BCL2-related ovarian killer protein                                                                   | 1.66 | 9.60E-06 |
| 22154.00     | Tubb5       | tubulin, beta 5                                                                                       | 1.65 | 7.30E-07 |
| 66102.00     | Cxcl16      | chemokine (C-X-C motif) ligand 16                                                                     | 1.65 | 0.00027  |
| 233066.00    | A1428936    | expressed sequence A1428936                                                                           | 1.65 | 9.20E-07 |
| 16149.00     | Cd74        | CD74 antigen (invariant polypeptide of major histocompatibility complex, class II antigen-associated) | 1.64 | 0.0081   |
| 27279.00     | Tnfrsf12a   | tumor necrosis factor receptor superfamily, member 12a                                                | 1.63 | 0.0015   |
| 20810.00     | Srm         | spermidine synthase                                                                                   | 1.63 | 8.00E-06 |
| 68147.00     | Gar1        | GAR1 ribonucleoprotein homolog (yeast)                                                                | 1.63 | 1.80E-06 |
| 29870.00     | Gtse1       | G two S phase expressed protein 1                                                                     | 1.63 | 8.90E-06 |
| 226419.00    | Dyrk3       | dual-specificity tyrosine-(Y)-phosphorylation regulated kinase 3                                      | 1.63 | 0.00011  |
| 11792.00     | Apex1       | apurinic/apyrimidinic endonuclease 1                                                                  | 1.62 | 2.10E-06 |
| 20509.00     | Slc19a1     | solute carrier family 19 (sodium/hydrogen exchanger), member 1                                        | 1.62 | 1.10E-06 |
| 18817.00     | Plk1        | polo-like kinase 1 (Drosophila)                                                                       | 1.62 | 3.80E-05 |
| 17220.00     | Mcm7        | minichromosome maintenance deficient 7 (S. cerevisiae)                                                | 1.61 | 9.60E-05 |
| 12505.00     | Cd44        | CD44 antigen                                                                                          | 1.61 | 7.10E-06 |
| 64424.00     | ILMN_189434 | Mus musculus polymerase (RNA) I polypeptide E (Polr1e), mRNA.                                         | 1.6  | 8.00E-06 |
| 13836.00     | Epha2       | Eph receptor A2                                                                                       | 1.6  | 0.00026  |
| 51797.00     | Ctps        | cytidine 5'-triphosphate synthase                                                                     | 1.6  | 4.80E-07 |
| 68337.00     | Crip2       | cysteine rich protein 2                                                                               | 1.6  | 3.40E-06 |
| 217995.00    | ILMN_214317 | Mus musculus HEAT repeat containing 1 (Heatr1), mRNA.                                                 | 1.59 | 7.70E-07 |
| 20595.00     | Smn1        | survival motor neuron 1                                                                               | 1.58 | 6.50E-07 |
| 30877.00     | Gnl3        | guanine nucleotide binding protein-like 3 (nucleolar)                                                 | 1.58 | 2.10E-05 |
| 14114.00     | Fbln1       | fibulin 1                                                                                             | 1.58 | 1.10E-05 |
| 211949.00    | Spsb4       | splA/ryanodine receptor domain and SOCS box containing 4                                              | 1.57 | 5.70E-06 |
| 16010.00     | Igfbp4      | insulin-like growth factor binding protein 4                                                          | 1.57 | 0.00058  |
| 30877.00     | Gnl3        | guanine nucleotide binding protein-like 3 (nucleolar)                                                 | 1.57 | 6.10E-06 |
| 20019.00     | Polr1a      | polymerase (RNA) I polypeptide A                                                                      | 1.56 | 3.50E-07 |
| 12006.00     | Axin2       | axin2                                                                                                 | 1.56 | 8.50E-05 |
| 70024.00     | Mcm10       | minichromosome maintenance deficient 10 (S. cerevisiae)                                               | 1.55 | 8.10E-08 |
| 17110.00     | Lyz1        | lysozyme 1                                                                                            | 1.55 | 0.0053   |
| 353156.00    | Egfl7       | EGF-like domain 7                                                                                     | 1.55 | 2.90E-06 |
| 66953.00     | Cdca7       | cell division cycle associated 7                                                                      | 1.55 | 8.00E-06 |
| 101612.00    | Grwd1       | glutamate-rich WD repeat containing 1                                                                 | 1.54 | 2.20E-06 |
| 27221.00     | Chaf1a      | chromatin assembly factor 1, subunit A (p150)                                                         | 1.54 | 2.00E-07 |
| 244886.00    | A1118078    | expressed sequence A1118078                                                                           | 1.54 | 1.10E-05 |
| 23825.00     | Banf1       | barrier to autointegration factor 1                                                                   | 1.53 | 4.80E-07 |
| 19385.00     | Ranbp1      | RAN binding protein 1                                                                                 | 1.52 | 3.50E-07 |
| 100019.00    | Mdn1        | midasin homolog (yeast)                                                                               | 1.52 | 2.00E-05 |
| 17228.00     | Cma1        | chymase 1, mast cell                                                                                  | 1.52 | 1.60E-05 |
| 12545.00     | Cdc7        | cell division cycle 7 (S. cerevisiae)                                                                 | 1.52 | 1.20E-07 |
| 66350.00     | Pla2g12a    | phospholipase A2, group X1IA                                                                          | 1.51 | 6.80E-06 |
| 13639.00     | Efna4       | ephrin A4                                                                                             | 1.51 | 3.10E-05 |
| 11746.00     | Anxa4       | annexin A4                                                                                            | 1.51 | 0.034    |
| 72462.00     | Rrp1b       | ribosomal RNA processing 1 homolog B (S. cerevisiae)                                                  | 1.5  | 0.0037   |
| 22113.00     | Phlda2      | pleckstrin homology-like domain, family A, member 2                                                   | 1.49 | 0.00031  |
| 100044829.00 | ILMN_209238 | PREDICTED: Mus musculus similar to Fibrillarln, transcript variant 1 (LOC100044829), mRNA.            | 1.49 | 6.40E-07 |
| 17217.00     | Mcm4        | minichromosome maintenance deficient 4 homolog (S. cerevisiae)                                        | 1.48 | 1.70E-06 |
| 100046741.00 | ILMN_190874 | PREDICTED: Mus musculus similar to red-1 (LOC100046741), mRNA.                                        | 1.47 | 1.20E-06 |
| 102657.00    | Cd276       | CD276 antigen                                                                                         | 1.47 | 1.00E-05 |
| 19183.00     | Psme3ip     | proteasome (prosome, macropain) 26S subunit, ATPase 3, interacting protein                            | 1.46 | 1.00E-04 |
| 17219.00     | Mcm6        | minichromosome maintenance deficient 6 (MIS5 homolog, S. pombe) (S. cerevisiae)                       | 1.46 | 3.70E-07 |
| 70024.00     | Mcm10       | minichromosome maintenance deficient 10 (S. cerevisiae)                                               | 1.46 | 1.20E-05 |
| 22321.00     | Vars        | valyl-tRNA synthetase                                                                                 | 1.45 | 7.10E-06 |
| 103733.00    | ILMN_184611 | Mus musculus tubulin, gamma 1 (Tubg1), mRNA.                                                          | 1.45 | 1.00E-04 |
| 22059.00     | Trp53       | transformation related protein 53                                                                     | 1.45 | 6.80E-06 |
| 56390.00     | Ssca1       | Sjogren's syndrome/scleroderma autoantigen 1 homolog (human)                                          | 1.45 | 1.20E-05 |
| 56390.00     | Ssca1       | Sjogren's syndrome/scleroderma autoantigen 1 homolog (human)                                          | 1.45 | 7.10E-07 |
| 641240.00    | ILMN_210638 | PREDICTED: Mus musculus similar to MHC class II antigen beta chain (LOC641240), mRNA.                 | 1.45 | 0.013    |
| 14156.00     | Fen1        | flap structure specific endonuclease 1                                                                | 1.45 | 2.40E-06 |
| 51797.00     | Ctps        | cytidine 5'-triphosphate synthase                                                                     | 1.45 | 2.50E-05 |



|             |             |                                                                                 |      |          |
|-------------|-------------|---------------------------------------------------------------------------------|------|----------|
| 20641.00    | Snrpd1      | small nuclear ribonucleoprotein D1                                              | 1.44 | 3.00E-06 |
| 56520.00    | Nme4        | non-metastatic cells 4, protein expressed in                                    | 1.44 | 1.00E-05 |
| 11475.00    | Acta2       | actin, alpha 2, smooth muscle, aorta                                            | 1.44 | 0.00071  |
| 72821.00    | Scn2b       | sodium channel, voltage-gated, type II, beta                                    | 1.43 | 4.90E-05 |
| 19366.00    | Rad54l      | RAD54 like ( <i>S. cerevisiae</i> )                                             | 1.43 | 3.10E-07 |
| 16918.00    | Myc1        | v-myc myelocytomatosis viral oncogene homolog 1, lung carcinoma derived (avian) | 1.43 | 9.60E-05 |
| 66902.00    | Mtap        | methylthioadenosine phosphorylase                                               | 1.43 | 2.90E-06 |
| 17089.00    | Lyar        | Lyl antibody reactive clone                                                     | 1.43 | 9.60E-06 |
| 233876.00   | Hirip3      | HIRA interacting protein 3                                                      | 1.43 | 2.00E-07 |
| 14733.00    | Gpc1        | glypican 1                                                                      | 1.43 | 2.40E-06 |
| 56505.00    | Ruvb1l      | RuvB-like protein 1                                                             | 1.42 | 4.60E-07 |
| 57028.00    | Pdxp        | pyridoxal (pyridoxine, vitamin B6) phosphatase                                  | 1.42 | 1.00E-06 |
| 56520.00    | Nme4        | non-metastatic cells 4, protein expressed in                                    | 1.42 | 1.20E-05 |
| 18432.00    | Mybbp1a     | MYB binding protein (P160) 1a                                                   | 1.42 | 0.00016  |
| 67242.00    | Gemin6      | gem (nuclear organelle) associated protein 6                                    | 1.42 | 3.70E-06 |
| 11461.00    | Actb        | actin, beta                                                                     | 1.42 | 0.029    |
| 18140.00    | Uhrf1       | ubiquitin-like, containing PHD and RING finger domains, 1                       | 1.41 | 3.20E-06 |
| 54563.00    | Nup210      | nucleoporin 210                                                                 | 1.41 | 6.50E-06 |
| 17110.00    | Lyz1        | lysozyme 1                                                                      | 1.41 | 0.00081  |
| 15505.00    | Hsph1       | heat shock 105kDa/110kDa protein 1                                              | 1.41 | 3.50E-05 |
| 100102.00   | Pcsk9       | proprotein convertase subtilisin/kexin type 9                                   | 1.4  | 8.10E-05 |
| 67134.00    | Nop56       | NOP56 ribonucleoprotein homolog (yeast)                                         | 1.4  | 9.40E-05 |
| 14961.00    | H2-Ab1      | histocompatibility 2, class II antigen A, beta 1                                | 1.4  | 0.0076   |
| 227358.00   | Fam132b     | family with sequence similarity 132, member B                                   | 1.4  | 6.50E-06 |
| 110956.00   | D17H6S56E-5 | DNA segment, Chr 17, human D6S56E 5                                             | 1.39 | 3.50E-05 |
| 434341.00   | Nlr5        | NLR family, CARD domain containing 5                                            | 1.39 | 0.013    |
| 73284.00    | Ddit4l      | DNA-damage-inducible transcript 4-like                                          | 1.38 | 0.0017   |
| 12443.00    | Cend1       | cyclin D1                                                                       | 1.38 | 3.50E-07 |
| 381101.00   | BC048355    | cDNA sequence BC048355                                                          | 1.38 | 1.90E-05 |
| 67236.00    | Cinp        | cyclin-dependent kinase 2 interacting protein                                   | 1.38 | 3.20E-06 |
| 52530.00    | Nhp2        | NHP2 ribonucleoprotein homolog (yeast)                                          | 1.37 | 1.60E-05 |
| 105837.00   | Mtbp        | Mdm2, transformed 3T3 cell double minute p53 binding protein                    | 1.37 | 6.20E-08 |
| 13555.00    | E2f1        | E2F transcription factor 1                                                      | 1.37 | 3.50E-07 |
| 70333.00    | Cd3eap      | CD3E antigen, epsilon polypeptide associated protein                            | 1.37 | 0.00012  |
| 21354.00    | Tap1        | transporter 1, ATP-binding cassette, sub-family B (MDR/TAP)                     | 1.36 | 0.0067   |
|             | ILMN_187520 |                                                                                 | 1.36 | 9.60E-05 |
| 67671.00    | Rpl38       | ribosomal protein L38                                                           | 1.36 | 0.00025  |
| 59028.00    | Rcl1        | RNA terminal phosphate cyclase-like 1                                           | 1.36 | 4.90E-05 |
| 10044103.00 | ILMN_210607 | PREDICTED: Mus musculus similar to mKIAA1645 protein (LOC100044103), mRNA.      | 1.36 | 6.90E-05 |
| 12544.00    | Cdc45       | cell division cycle 45 homolog ( <i>S. cerevisiae</i> )                         | 1.36 | 2.50E-06 |
| 14450.00    | Gart        | phosphoribosylglycinamide formyltransferase                                     | 1.35 | 3.40E-05 |
| 22051.00    | Trip6       | thyroid hormone receptor interactor 6                                           | 1.34 | 8.30E-05 |
| 21915.00    | Dtymk       | deoxythymidylate kinase                                                         | 1.34 | 2.00E-04 |
| 330671.00   | B4galnt4    | beta-1,4-N-acetyl-galactosaminyl transferase 4                                  | 1.34 | 1.90E-05 |
| 11792.00    | Apex1       | apurinic/apyrimidinic endonuclease 1                                            | 1.34 | 0.00061  |
| 66965.00    | ILMN_198892 | Mus musculus RIKEN cDNA 2310061F22 gene (2310061F22Rik), mRNA.                  | 1.34 | 4.60E-07 |
| 98170.00    | Tmem132a    | transmembrane protein 132A                                                      | 1.33 | 7.50E-05 |
| 98170.00    | Tmem132a    | transmembrane protein 132A                                                      | 1.33 | 2.20E-06 |
| 245688.00   | ILMN_215499 | Mus musculus retinoblastoma binding protein 7 (Rbbp7), mRNA.                    | 1.33 | 2.00E-04 |
| 56361.00    | Pus1        | pseudouridine synthase 1                                                        | 1.33 | 2.30E-06 |
| 105837.00   | Mtbp        | Mdm2, transformed 3T3 cell double minute p53 binding protein                    | 1.33 | 2.10E-06 |
| 14999.00    | H2-DMb1     | histocompatibility 2, class II, locus Mb1                                       | 1.33 | 0.0048   |
| 14038.00    | Expi        | extracellular proteinase inhibitor                                              | 1.33 | 1.70E-05 |
| 109857.00   | Cbr3        | carbonyl reductase 3                                                            | 1.33 | 0.0076   |
| 406217.00   | ILMN_231589 | Mus musculus brain expressed gene 4 (Bex4), mRNA.                               | 1.33 | 9.60E-06 |
| 20641.00    | Snrpd1      | small nuclear ribonucleoprotein D1                                              | 1.32 | 4.50E-06 |
| 56505.00    | Ruvb1l      | RuvB-like protein 1                                                             | 1.32 | 1.50E-06 |
| 17304.00    | Mfge8       | milk fat globule-EGF factor 8 protein                                           | 1.32 | 0.00018  |
| 12028.00    | Bax         | BCL2-associated X protein                                                       | 1.32 | 0.00012  |
| 56279.00    | Fam69b      | family with sequence similarity 69, member B                                    | 1.32 | 6.10E-06 |
| 21681.00    | Thoc4       | THO complex 4                                                                   | 1.31 | 2.10E-05 |
| 17427.00    | Mns1        | meiosis-specific nuclear structural protein 1                                   | 1.31 | 3.30E-06 |
| 15361.00    | Hmgal       | high mobility group AT-hook 1                                                   | 1.31 | 0.00044  |
| 217995.00   | ILMN_214317 | Mus musculus HEAT repeat containing 1 (Heatr1), mRNA.                           | 1.31 | 0.00012  |
| 12265.00    | Ciita       | class II transactivator                                                         | 1.31 | 0.002    |
| 71449.00    | ILMN_221329 | Mus musculus RIKEN cDNA 5630401D24 gene (5630401D24Rik), mRNA.                  | 1.31 | 0.00022  |
| 93840.00    | Vangl2      | vang-like 2 (van gogh, <i>Drosophila</i> )                                      | 1.3  | 4.60E-05 |
| 78294.00    | Rps27a      | ribosomal protein S27A                                                          | 1.3  | 1.70E-05 |

|           |               |                                                                                                 |      |          |
|-----------|---------------|-------------------------------------------------------------------------------------------------|------|----------|
| 13639.00  | Efna4         | ephrin A4                                                                                       | 1.3  | 3.50E-05 |
| 21983.00  | Tpbg          | trophoblast glycoprotein                                                                        | 1.29 | 2.60E-06 |
| 21973.00  | Top2a         | topoisomerase (DNA) II alpha                                                                    | 1.29 | 0.00026  |
| 108037.00 | Shmt2         | serine hydroxymethyltransferase 2 (mitochondrial)                                               | 1.29 | 6.70E-06 |
| 67223.00  | Rrp15         | ribosomal RNA processing 15 homolog (S. cerevisiae)                                             | 1.29 | 3.40E-05 |
| 12443.00  | Ccnd1         | cyclin D1                                                                                       | 1.29 | 5.40E-05 |
| 12153.00  | Bmp1          | bone morphogenetic protein 1                                                                    | 1.29 | 2.40E-05 |
| 18971.00  | Pold1         | polymerase (DNA directed), delta 1, catalytic subunit                                           | 1.28 | 4.90E-05 |
| 18969.00  | Pola2         | polymerase (DNA directed), alpha 2                                                              | 1.28 | 6.40E-06 |
| 27756.00  | Lsm2          | LSM2 homolog, U6 small nuclear RNA associated (S. cerevisiae)                                   | 1.28 | 3.40E-06 |
| 116701.00 | ILMN_211983   | Mus musculus fibroblast growth factor receptor-like 1 (Fgfr1), mRNA.                            | 1.28 | 1.10E-05 |
| 214901.00 | Chtf18        | CTF18, chromosome transmission fidelity factor 18 homolog (S. cerevisiae)                       | 1.28 | 7.60E-06 |
| 72640.00  | Mex3a         | mex3 homolog A (C. elegans)                                                                     | 1.27 | 2.40E-06 |
| 17357.00  | Marcks11      | MARCKS-like 1                                                                                   | 1.27 | 0.00023  |
| 110033.00 | Kif22         | kinesin family member 22                                                                        | 1.27 | 1.00E-05 |
| 110006.00 | ILMN_221841   | Mus musculus glucuronidase, beta (Gusb), mRNA.                                                  | 1.27 | 2.20E-05 |
| 14450.00  | Gart          | phosphoribosylglycinamide formyltransferase                                                     | 1.27 | 9.60E-05 |
| 104156.00 | Etv5          | ets variant gene 5                                                                              | 1.27 | 0.00019  |
| 12144.00  | Blm           | Bloom syndrome, RecQ helicase-like                                                              | 1.27 | 1.40E-05 |
| 71242.00  | Spata24       | spermatogenesis associated 24                                                                   | 1.27 | 7.90E-05 |
| 214572.00 | Prmt7         | protein arginine N-methyltransferase 7                                                          | 1.26 | 1.10E-05 |
| 53605.00  | ILMN_214137   | Mus musculus nucleosome assembly protein 1-like 1 (Nap11), mRNA.                                | 1.26 | 1.30E-05 |
| 17869.00  | Myc           | myelocytomatosis oncogene                                                                       | 1.26 | 0.00011  |
| 17110.00  | Lyz1          | lysozyme 1                                                                                      | 1.26 | 0.0024   |
| 17228.00  | Cma1          | chymase 1, mast cell                                                                            | 1.26 | 6.50E-05 |
| 52276.00  | Cdca8         | cell division cycle associated 8                                                                | 1.26 | 9.30E-06 |
| 69928.00  | Aptd1         | apoptosis-inducing, TAF9-like domain 1                                                          | 1.26 | 0.00026  |
| 80914.00  | Uck2          | uridine-cytidine kinase 2                                                                       | 1.25 | 1.80E-05 |
| 104367.00 | Snora65       | small nucleolar RNA, H/ACA box 65                                                               | 1.25 | 4.00E-05 |
| 245688.00 | ILMN_215499   | Mus musculus retinoblastoma binding protein 7 (Rbbp7), mRNA.                                    | 1.25 | 0.0014   |
| 68294.00  | Mfsd10        | major facilitator superfamily domain containing 10                                              | 1.25 | 1.60E-05 |
|           | ILMN_208668   |                                                                                                 | 1.25 | 8.90E-06 |
| 66570.00  | Cenpm         | centromere protein M                                                                            | 1.25 | 3.10E-07 |
| 237038.00 | Nox1          | NADPH oxidase 1                                                                                 | 1.24 | 0.0092   |
| 18102.00  | ILMN_209549   | Mus musculus non-metastatic cells 1, protein (NM23A) expressed in (Nme1), mRNA.                 | 1.24 | 1.80E-06 |
| 108673.00 | Ccdc86        | coiled-coil domain containing 86                                                                | 1.24 | 0.00035  |
| 57315.00  | Wdr46         | WD repeat domain 46                                                                             | 1.23 | 6.10E-05 |
| 72787.00  | Tmem48        | transmembrane protein 48                                                                        | 1.23 | 1.20E-05 |
| 236539.00 | ILMN_226456   | Mus musculus 3-phosphoglycerate dehydrogenase (Phgdh), mRNA.                                    | 1.23 | 0.00052  |
| 234865.00 | Nup133        | nucleoporin 133                                                                                 | 1.23 | 1.80E-05 |
| 67711.00  | Nsmce1        | non-SMC element 1 homolog (S. cerevisiae)                                                       | 1.23 | 2.00E-04 |
| 27993.00  | Imp4          | IMP4, U3 small nucleolar ribonucleoprotein, homolog (yeast)                                     | 1.23 | 7.10E-06 |
| 434632.00 | BC085271      | cDNA sequence BC085271                                                                          | 1.23 | 0.00032  |
| 56412.00  | 2610024G14Rik | RIKEN cDNA 2610024G14 gene                                                                      | 1.23 | 1.80E-05 |
| 68926.00  | Ubap2         | ubiquitin-associated protein 2                                                                  | 1.22 | 3.00E-06 |
| 20174.00  | Ruvb12        | RuvB-like protein 2                                                                             | 1.22 | 3.50E-06 |
| 19891.00  | Rpa2          | replication protein A2                                                                          | 1.22 | 0.00017  |
| 59028.00  | Rcl1          | RNA terminal phosphate cyclase-like 1                                                           | 1.22 | 0.00046  |
| 106582.00 | Nrm           | nurim (nuclear envelope membrane protein)                                                       | 1.22 | 2.00E-06 |
| 17748.00  | Mt1           | metallothionein 1                                                                               | 1.22 | 0.00092  |
| 15114.00  | Hap1          | huntingtin-associated protein 1                                                                 | 1.22 | 0.00011  |
| 66570.00  | Cenpm         | centromere protein M                                                                            | 1.22 | 2.10E-06 |
| 59053.00  | Fam203a       | family with sequence similarity 203, member A                                                   | 1.22 | 1.00E-05 |
| 17299.00  | Mett1         | methyltransferase like 1                                                                        | 1.21 | 0.00049  |
| 110006.00 | Gusb          | glucuronidase, beta                                                                             | 1.21 | 7.80E-05 |
| 14630.00  | Gclm          | glutamate-cysteine ligase, modifier subunit                                                     | 1.21 | 2.70E-06 |
| 69639.00  | Exosc8        | exosome component 8                                                                             | 1.21 | 1.80E-05 |
| 80914.00  | Uck2          | uridine-cytidine kinase 2                                                                       | 1.2  | 1.50E-05 |
| 110816.00 | ILMN_212496   | Mus musculus PWP2 periodic tryptophan protein homolog (yeast) (Pwp2), mRNA.                     | 1.2  | 0.00013  |
| 654467.00 | ILMN_234090   | Mus musculus heterogeneous nuclear ribonucleoprotein A1 pseudogene (LOC654467) on chromosome 9. | 1.2  | 0.00031  |
| 209737.00 | ILMN_212864   | Mus musculus kinesin family member 15 (Kif15), mRNA.                                            | 1.2  | 6.50E-06 |
| 272359.00 | Irf2bp1       | interferon regulatory factor 2 binding protein 1                                                | 1.2  | 1.30E-05 |
| 14916.00  | Guca2b        | guanylate cyclase activator 2b (retina)                                                         | 1.2  | 0.00029  |
| 381903.00 | Alg8          | asparagine-linked glycosylation 8 homolog (yeast, alpha-1,3-glucosyltransferase)                | 1.2  | 5.60E-06 |
| 104732.00 | 4930427A07Rik | RIKEN cDNA 4930427A07 gene                                                                      | 1.2  | 0.00013  |
| 72657.00  | 2700094K13Rik | RIKEN cDNA 2700094K13 gene                                                                      | 1.2  | 1.60E-05 |
| 57257.00  | Vav3          | vav 3 oncogene                                                                                  | 1.19 | 2.40E-06 |
| 20133.00  | ILMN_231868   | Mus musculus ribonucleotide reductase M1 (Rrm1), mRNA.                                          | 1.19 | 8.90E-05 |

|           |               |                                                                                  |      |          |
|-----------|---------------|----------------------------------------------------------------------------------|------|----------|
| 245688.00 | ILMN_215499   | Mus musculus retinoblastoma binding protein 7 (Rbbp7), mRNA.                     | 1.19 | 6.00E-04 |
| 226519.00 | ILMN_232528   | Mus musculus laminin, gamma 1 (Lamc1), mRNA.                                     | 1.19 | 0.00037  |
| 23834.00  | Cdc6          | cell division cycle 6 homolog ( <i>S. cerevisiae</i> )                           | 1.19 | 4.80E-06 |
| 69719.00  | Cad           | carbamoyl-phosphate synthetase 2, aspartate transcarbamylase, and dihydroorotase | 1.19 | 0.00035  |
| 14025.00  | Bc11a         | B-cell CLL/lymphoma 11A (zinc finger protein)                                    | 1.19 | 3.80E-05 |
| 74254.00  | Gpn1          | GPN-loop GTPase 1                                                                | 1.18 | 5.50E-05 |
| 22256.00  | Ung           | uracil DNA glycosylase                                                           | 1.18 | 1.00E-04 |
| 21849.00  | Trim28        | tripartite motif-containing 28                                                   | 1.18 | 2.20E-05 |
| 75273.00  | Pelp1         | proline, glutamic acid and leucine rich protein 1                                | 1.18 | 0.00014  |
| 70572.00  | Ipo5          | importin 5                                                                       | 1.18 | 2.90E-06 |
| 15312.00  | Hmgn1         | high mobility group nucleosomal binding domain 1                                 | 1.18 | 1.10E-05 |
| 20624.00  | Eftud2        | elongation factor Tu GTP binding domain containing 2                             | 1.18 | 1.00E-05 |
| 27407.00  | Abcf2         | ATP-binding cassette, sub-family F (GCN20), member 2                             | 1.18 | 5.70E-06 |
| 56412.00  | 2610024G14Rik | RIKEN cDNA 2610024G14 gene                                                       | 1.18 | 1.30E-05 |
| 21781.00  | Tfdp1         | transcription factor Dp 1                                                        | 1.17 | 1.50E-05 |
| 27966.00  | Rrp9          | RRP9, small subunit (SSU) processome component, homolog (yeast)                  | 1.17 | 0.00013  |
| 72151.00  | Rfc5          | replication factor C (activator 1) 5                                             | 1.17 | 1.10E-06 |
| 57785.00  | Rangrf        | RAN guanine nucleotide release factor                                            | 1.17 | 6.20E-05 |
| 19679.00  | Pitpnm2       | phosphatidylinositol transfer protein, membrane-associated 2                     | 1.17 | 6.10E-05 |
| 17975.00  | Ncl           | nucleolin                                                                        | 1.17 | 6.80E-06 |
| 16881.00  | Lig1          | ligase 1, DNA, ATP-dependent                                                     | 1.17 | 4.20E-05 |
| 23886.00  | Gdf15         | growth differentiation factor 15                                                 | 1.17 | 0.042    |
| 55932.00  | Gbp3          | guanylate binding protein 3                                                      | 1.17 | 0.019    |
| 434858.00 | ILMN_233946   | Mus musculus predicted gene, EG434858 (EG434858), non-coding RNA.                | 1.17 | 0.0046   |
| 72082.00  | Cyp2c55       | cytochrome P450, family 2, subfamily c, polypeptide 55                           | 1.17 | 0.026    |
| 107995.00 | Cdc20         | cell division cycle 20 homolog ( <i>S. cerevisiae</i> )                          | 1.17 | 0.00023  |
| 230991.00 | B930041F14Rik | RIKEN cDNA B930041F14 gene                                                       | 1.17 | 1.80E-05 |
| 71242.00  | Spata24       | spermatogenesis associated 24                                                    | 1.17 | 5.10E-06 |
| 28035.00  | Usp39         | ubiquitin specific peptidase 39                                                  | 1.16 | 9.60E-06 |
| 63959.00  | Slc29a1       | solute carrier family 29 (nucleoside transporters), member 1                     | 1.16 | 0.00045  |
| 67824.00  | Nmral1        | NmrA-like family domain containing 1                                             | 1.16 | 9.60E-06 |
| 60441.00  | Mrpl38        | mitochondrial ribosomal protein L38                                              | 1.16 | 6.70E-05 |
| 12462.00  | Cct3          | chaperonin containing Tcp1, subunit 3 (gamma)                                    | 1.16 | 3.50E-05 |
| 330050.00 | Fam185a       | family with sequence similarity 185, member A                                    | 1.16 | 4.50E-06 |
| 22294.00  | Uxt           | ubiquitously expressed transcript                                                | 1.15 | 8.00E-06 |
| 19245.00  | Ptp4a3        | protein tyrosine phosphatase 4a3                                                 | 1.15 | 0.0011   |
| 215387.00 | Ncaph         | non-SMC condensin I complex, subunit H                                           | 1.15 | 0.00052  |
| 17938.00  | Naca          | nascent polypeptide-associated complex alpha polypeptide                         | 1.15 | 2.10E-06 |
| 66973.00  | Mrps18b       | mitochondrial ribosomal protein S18B                                             | 1.15 | 1.00E-05 |
|           | ILMN_199160   |                                                                                  | 1.15 | 0.0044   |
| 16201.00  | Ilf3          | interleukin enhancer binding factor 3                                            | 1.15 | 3.60E-06 |
| 13433.00  | Dnmt1         | DNA methyltransferase (cytosine-5) 1                                             | 1.15 | 0.00012  |
| 18117.00  | Cox4nb        | COX4 neighbor                                                                    | 1.15 | 7.60E-06 |
| 12740.00  | Cldn4         | claudin 4                                                                        | 1.15 | 0.0016   |
| 102920.00 | Cenpi         | centromere protein I                                                             | 1.15 | 0.00071  |
| 107995.00 | Cdc20         | cell division cycle 20 homolog ( <i>S. cerevisiae</i> )                          | 1.15 | 0.00046  |
| 12181.00  | Bop1          | block of proliferation 1                                                         | 1.15 | 0.00014  |
| 23825.00  | Banf1         | barrier to autointegration factor 1                                              | 1.15 | 9.80E-05 |
| 56412.00  | 2610024G14Rik | RIKEN cDNA 2610024G14 gene                                                       | 1.15 | 8.00E-06 |
| 21844.00  | Tiam1         | T-cell lymphoma invasion and metastasis 1                                        | 1.14 | 1.90E-05 |
| 67390.00  | Rnmt1         | RNA methyltransferase like 1                                                     | 1.14 | 6.90E-05 |
| 78929.00  | ILMN_209245   | Mus musculus polymerase (RNA) III (DNA directed) polypeptide H (Polr3h), mRNA.   | 1.14 | 9.60E-06 |
| 66667.00  | Hspbap1       | Hspb associated protein 1                                                        | 1.14 | 4.00E-05 |
| 55927.00  | Hes6          | hairy and enhancer of split 6 ( <i>Drosophila</i> )                              | 1.14 | 7.60E-06 |
| 14776.00  | Gpx2          | glutathione peroxidase 2                                                         | 1.14 | 1.10E-05 |
| 14114.00  | Fbln1         | fibulin 1                                                                        | 1.14 | 0.00044  |
| 76267.00  | Fads1         | fatty acid desaturase 1                                                          | 1.14 | 4.20E-05 |
| 71919.00  | Rpap3         | RNA polymerase II associated protein 3                                           | 1.14 | 0.00011  |
| 66912.00  | Bzw2          | basic leucine zipper and W2 domains 2                                            | 1.14 | 0.00012  |
| 11799.00  | Birc5         | baculoviral IAP repeat-containing 5                                              | 1.14 | 2.00E-05 |
| 66131.00  | Tipin         | timeless interacting protein                                                     | 1.13 | 6.10E-05 |
| 225608.00 | Sh3tc2        | SH3 domain and tetratricopeptide repeats 2                                       | 1.13 | 0.00034  |
| 20135.00  | ILMN_225236   | Mus musculus ribonucleotide reductase M2 (Rrm2), mRNA.                           | 1.13 | 0.00016  |
| 26564.00  | Ror2          | receptor tyrosine kinase-like orphan receptor 2                                  | 1.13 | 0.00058  |
| 14208.00  | Ppm1g         | protein phosphatase 1G (formerly 2C), magnesium-dependent, gamma isoform         | 1.13 | 4.00E-05 |
| 18972.00  | Pold2         | polymerase (DNA directed), delta 2, regulatory subunit                           | 1.13 | 6.60E-06 |
| 18221.00  | Nudc          | nuclear distribution gene C homolog ( <i>Aspergillus</i> )                       | 1.13 | 3.50E-06 |
| 18221.00  | Nudc          | nuclear distribution gene C homolog ( <i>Aspergillus</i> )                       | 1.13 | 0.00019  |

|              |               |                                                                                                        |      |          |
|--------------|---------------|--------------------------------------------------------------------------------------------------------|------|----------|
| 50927.00     | ILMN_211691   | Mus musculus nuclear autoantigenic sperm protein (histone-binding) (Nasp), transcript variant 2, mRNA. | 1.13 | 5.50E-05 |
| 70082.00     | Lysmd2        | LysM, putative peptidoglycan-binding, domain containing 2                                              | 1.13 | 0.0014   |
| 100047155.00 | ILMN_221233   | PREDICTED: Mus musculus similar to Small nuclear ribonucleoprotein polypeptide A (LOC100047155), mRNA. | 1.13 | 7.00E-06 |
| 100042777.00 | ILMN_212781   | PREDICTED: Mus musculus similar to human protein homologous to DROER protein (LOC100042777), mRNA.     | 1.13 | 2.80E-06 |
| 69550.00     | Bst2          | bone marrow stromal cell antigen 2                                                                     | 1.13 | 6.20E-05 |
| 12144.00     | Blm           | Bloom syndrome, RecQ helicase-like                                                                     | 1.13 | 2.10E-05 |
| 11799.00     | Birc5         | baculoviral IAP repeat-containing 5                                                                    | 1.13 | 0.00037  |
| 406217.00    | Bex4          | brain expressed gene 4                                                                                 | 1.13 | 0.0076   |
| 66422.00     | Dctpp1        | dCTP pyrophosphatase 1                                                                                 | 1.13 | 0.00014  |
| 107071.00    | Wdr74         | WD repeat domain 74                                                                                    | 1.12 | 6.10E-05 |
| 66409.00     | Rsl1d1        | ribosomal L1 domain containing 1                                                                       | 1.12 | 1.90E-05 |
| 28000.00     | Prpf19        | PRP19/PSO4 pre-mRNA processing factor 19 homolog (S. cerevisiae)                                       | 1.12 | 1.70E-05 |
| 11545.00     | Parp1         | poly (ADP-ribose) polymerase family, member 1                                                          | 1.12 | 5.40E-05 |
| 677205.00    | ILMN_212422   | PREDICTED: Mus musculus similar to DEAD (Asp-Glu-Ala-Asp) box polypeptide 18 (LOC677205), misc RNA.    | 1.12 | 7.60E-06 |
| 105988.00    | Esp11         | extra spindle poles-like 1 (S. cerevisiae)                                                             | 1.12 | 2.20E-05 |
| 103551.00    | E130012A19Rik | RIKEN cDNA E130012A19 gene                                                                             | 1.12 | 0.0033   |
| 108888.00    | Atad3a        | ATPase family, AAA domain containing 3A                                                                | 1.12 | 4.90E-05 |
| 27407.00     | Abcf2         | ATP-binding cassette, sub-family F (GCN20), member 2                                                   | 1.12 | 2.00E-06 |
| 22294.00     | Uxt           | ubiquitously expressed transcript                                                                      | 1.11 | 3.80E-06 |
| 22143.00     | Tuba1b        | tubulin, alpha 1B                                                                                      | 1.11 | 4.00E-05 |
| 268396.00    | Sh3pxd2b      | SH3 and PX domains 2B                                                                                  | 1.11 | 6.90E-05 |
| 100088.00    | Rcc1          | regulator of chromosome condensation 1                                                                 | 1.11 | 3.50E-05 |
| 71974.00     | Prmt3         | protein arginine N-methyltransferase 3                                                                 | 1.11 | 2.10E-05 |
| 100043257.00 | ILMN_215552   | PREDICTED: Mus musculus similar to RNA binding motif protein 3 (LOC100043257), mRNA.                   | 1.11 | 4.50E-06 |
| 57905.00     | Isy1          | ISY1 splicing factor homolog (S. cerevisiae)                                                           | 1.11 | 8.50E-06 |
| 93695.00     | Gpmb          | glycoprotein (transmembrane) nmb                                                                       | 1.11 | 0.027    |
| 227715.00    | Exosc2        | exosome component 2                                                                                    | 1.11 | 0.00012  |
| 71963.00     | Cdca4         | cell division cycle associated 4                                                                       | 1.11 | 1.40E-05 |
| 11799.00     | Birc5         | baculoviral IAP repeat-containing 5                                                                    | 1.11 | 8.90E-05 |
| 170759.00    | Atp13a1       | ATPase type 13A1                                                                                       | 1.11 | 0.00094  |
| 21817.00     | Tgm2          | transglutaminase 2, C polypeptide                                                                      | 1.1  | 0.0012   |
| 214572.00    | Prmt7         | protein arginine N-methyltransferase 7                                                                 | 1.1  | 3.50E-05 |
| 27374.00     | ILMN_257867   | Mus musculus protein arginine N-methyltransferase 5 (Prmt5), mRNA.                                     | 1.1  | 0.00032  |
| 56031.00     | Ppie          | peptidylprolyl isomerase E (cyclophilin E)                                                             | 1.1  | 4.40E-05 |
| 211548.00    | Nomo1         | nodal modulator 1                                                                                      | 1.1  | 1.40E-05 |
| 97961.00     | Nol12         | nucleolar protein 12                                                                                   | 1.1  | 2.60E-05 |
| 110109.00    | Nop2          | NOP2 nucleolar protein homolog (yeast)                                                                 | 1.1  | 0.00034  |
| 66978.00     | Luc7l         | Luc7 homolog (S. cerevisiae)-like                                                                      | 1.1  | 6.50E-05 |
| 55944.00     | Eif3d         | eukaryotic translation initiation factor 3, subunit D                                                  | 1.1  | 0.00014  |
| 107995.00    | Cdc20         | cell division cycle 20 homolog (S. cerevisiae)                                                         | 1.1  | 0.00011  |
| 71449.00     | ILMN_221329   | Mus musculus RIKEN cDNA 5630401D24 gene (5630401D24Rik), mRNA.                                         | 1.1  | 8.10E-05 |
| 68026.00     | 2810417H13Rik | RIKEN cDNA 2810417H13 gene                                                                             | 1.1  | 0.002    |
| 232679.00    | Zc3hc1        | zinc finger, C3HC type 1                                                                               | 1.09 | 6.70E-05 |
| 230734.00    | Yrdc          | yrdC domain containing (E.coli)                                                                        | 1.09 | 0.00022  |
| 72171.00     | Shq1          | SHQ1 homolog (S. cerevisiae)                                                                           | 1.09 | 6.50E-06 |
| 107094.00    | Rrp12         | ribosomal RNA processing 12 homolog (S. cerevisiae)                                                    | 1.09 | 7.80E-05 |
| 20085.00     | Rps19         | ribosomal protein S19                                                                                  | 1.09 | 5.40E-05 |
| 27374.00     | Prmt5         | protein arginine N-methyltransferase 5                                                                 | 1.09 | 4.90E-05 |
| 27374.00     | Prmt5         | protein arginine N-methyltransferase 5                                                                 | 1.09 | 1.10E-05 |
| 56452.00     | Orc6          | origin recognition complex, subunit 6                                                                  | 1.09 | 3.90E-06 |
| 68294.00     | Mfsd10        | major facilitator superfamily domain containing 10                                                     | 1.09 | 1.10E-05 |
| 17083.00     | Tmed1         | transmembrane emp24 domain containing 1                                                                | 1.09 | 5.80E-05 |
| 22379.00     | Fmnl3         | formin-like 3                                                                                          | 1.09 | 0.00023  |
| 13877.00     | ILMN_212781   | Mus musculus enhancer of rudimentary homolog (Drosophila) (Erh), mRNA.                                 | 1.09 | 1.40E-05 |
| 68087.00     | ILMN_218673   | Mus musculus dephospho-CoA kinase domain containing (Dcakd), mRNA.                                     | 1.09 | 1.90E-06 |
| 27407.00     | Abcf2         | ATP-binding cassette, sub-family F (GCN20), member 2                                                   | 1.09 | 0.00017  |
| 74111.00     | Rbm19         | RNA binding motif protein 19                                                                           | 1.08 | 0.00083  |
| 240334.00    | Pcyox1l       | prenylcysteine oxidase 1 like                                                                          | 1.08 | 5.00E-04 |
| 66164.00     | Nip7          | nuclear import 7 homolog (S. cerevisiae)                                                               | 1.08 | 2.30E-05 |
| 13849.00     | Ephx1         | epoxide hydrolase 1, microsomal                                                                        | 1.08 | 0.0055   |
| 13401.00     | Dmwd          | dystrophia myotonica-containing WD repeat motif                                                        | 1.08 | 1.40E-05 |
| 27407.00     | Abcf2         | ATP-binding cassette, sub-family F (GCN20), member 2                                                   | 1.08 | 0.00018  |
| 72155.00     | Cenpn         | centromere protein N                                                                                   | 1.08 | 1.10E-05 |
| 66976.00     | ILMN_212730   | Mus musculus RIKEN cDNA 2410002F23 gene (2410002F23Rik), mRNA.                                         | 1.08 | 0.00025  |
| 68971.00     | 1500001M20Rik | RIKEN cDNA 1500001M20 gene                                                                             | 1.08 | 0.00014  |
| 22146.00     | Tuba1c        | tubulin, alpha 1C                                                                                      | 1.07 | 0.00034  |
| 22021.00     | Tpst1         | protein-tyrosine sulfotransferase 1                                                                    | 1.07 | 7.90E-05 |
| 52033.00     | Pbk           | PDZ binding kinase                                                                                     | 1.07 | 6.10E-05 |

|              |               |                                                                                                                                      |      |          |
|--------------|---------------|--------------------------------------------------------------------------------------------------------------------------------------|------|----------|
| 26425.00     | Nubp1         | nucleotide binding protein 1                                                                                                         | 1.07 | 9.30E-06 |
| 17219.00     | Mcm6          | minichromosome maintenance deficient 6 (MIS5 homolog, <i>S. pombe</i> ) ( <i>S. cerevisiae</i> )                                     | 1.07 | 2.30E-06 |
| 100047856.00 | ILMN_208813   | PREDICTED: <i>Mus musculus</i> similar to calponin 3, acidic (LOC100047856), mRNA.                                                   | 1.07 | 0.00036  |
| 15510.00     | ILMN_213620   | <i>Mus musculus</i> heat shock protein 1 (chaperonin) (Hspd1), mRNA.                                                                 | 1.07 | 0.016    |
| 14859.00     | Gsta3         | glutathione S-transferase, alpha 3                                                                                                   | 1.07 | 0.0029   |
| 20624.00     | Eftud2        | elongation factor Tu GTP binding domain containing 2                                                                                 | 1.07 | 7.60E-06 |
| 50496.00     | ILMN_220573   | <i>Mus musculus</i> E2F transcription factor 6 (E2f6), mRNA.                                                                         | 1.07 | 2.50E-05 |
| 12387.00     | ILMN_211511   | <i>Mus musculus</i> catenin (cadherin associated protein), beta 1 (Ctnnb1), mRNA.                                                    | 1.07 | 0.0018   |
| 107373.00    | Fam111a       | family with sequence similarity 111, member A                                                                                        | 1.07 | 4.50E-06 |
| 27366.00     | Txn14a        | thioredoxin-like 4A                                                                                                                  | 1.06 | 2.80E-05 |
| 30056.00     | Timm9         | translocase of inner mitochondrial membrane 9 homolog (yeast)                                                                        | 1.06 | 7.10E-06 |
| 66628.00     | Thg1          | tRNA-histidine guanylyltransferase 1-like ( <i>S. cerevisiae</i> )                                                                   | 1.06 | 0.00015  |
| 11545.00     | Parp1         | poly (ADP-ribose) polymerase family, member 1                                                                                        | 1.06 | 9.60E-06 |
| 56488.00     | Nxt1          | NTF2-related export protein 1                                                                                                        | 1.06 | 1.10E-05 |
| 234865.00    | Nup133        | nucleoporin 133                                                                                                                      | 1.06 | 0.002    |
| 52683.00     | Ncaph2        | non-SMC condensin II complex, subunit H2                                                                                             | 1.06 | 6.50E-06 |
| 16206.00     | Lrig1         | leucine-rich repeats and immunoglobulin-like domains 1                                                                               | 1.06 | 4.20E-06 |
| 76113.00     | Lpo           | lactoperoxidase                                                                                                                      | 1.06 | 1.10E-05 |
| 16906.00     | ILMN_220293   | <i>Mus musculus</i> lamin B1 (Lmnb1), mRNA.                                                                                          | 1.06 | 4.00E-05 |
| 80876.00     | Ifitm2        | interferon induced transmembrane protein 2                                                                                           | 1.06 | 0.00076  |
| 66583.00     | Exosc1        | exosome component 1                                                                                                                  | 1.06 | 4.60E-05 |
| 67102.00     | D16Ert472e    | DNA segment, Chr 16, ERATO Doi 472, expressed                                                                                        | 1.06 | 0.0011   |
| 21771.00     | Cirh1a        | cirrhosis, autosomal recessive 1A (human)                                                                                            | 1.06 | 0.00013  |
| 67849.00     | Cdca5         | cell division cycle associated 5                                                                                                     | 1.06 | 0.00037  |
| 12462.00     | Cct3          | chaperonin containing Tcp1, subunit 3 (gamma)                                                                                        | 1.06 | 8.30E-05 |
| 27081.00     | Zfp275        | zinc finger protein 275                                                                                                              | 1.05 | 0.00027  |
| 71354.00     | Wdr31         | WD repeat domain 31                                                                                                                  | 1.05 | 4.00E-04 |
| 54141.00     | Spag5         | sperm associated antigen 5                                                                                                           | 1.05 | 6.50E-06 |
| 107686.00    | Snrpd2        | small nuclear ribonucleoprotein D2                                                                                                   | 1.05 | 3.50E-05 |
| 20587.00     | Smarb1        | SWI/SNF related, matrix associated, actin dependent regulator of chromatin, subfamily b, member 1                                    | 1.05 | 2.00E-04 |
| 55963.00     | Slc1a4        | solute carrier family 1 (glutamate/neutral amino acid transporter), member 4                                                         | 1.05 | 0.0015   |
| 28000.00     | Prpf19        | PRP19/PSO4 pre-mRNA processing factor 19 homolog ( <i>S. cerevisiae</i> )                                                            | 1.05 | 0.0012   |
| 28000.00     | Prpf19        | PRP19/PSO4 pre-mRNA processing factor 19 homolog ( <i>S. cerevisiae</i> )                                                            | 1.05 | 0.00015  |
| 67037.00     | Pmf1          | polyamine-modulated factor 1                                                                                                         | 1.05 | 4.20E-05 |
| 110109.00    | Nop2          | NOP2 nucleolar protein homolog (yeast)                                                                                               | 1.05 | 9.40E-05 |
| 17975.00     | Ncl           | nucleolin                                                                                                                            | 1.05 | 6.00E-05 |
| 108156.00    | Mthfd1        | methylenetetrahydrofolate dehydrogenase (NADP+ dependent), methylenetetrahydrofolate cyclohydrolase, formyltetrahydrofolate synthase | 1.05 | 0.00037  |
| 17535.00     | Mre11a        | meiotic recombination 11 homolog A ( <i>S. cerevisiae</i> )                                                                          | 1.05 | 1.80E-05 |
| 15191.00     | Hdgf          | hepatoma-derived growth factor                                                                                                       | 1.05 | 4.00E-05 |
| 232680.00    | Cpa2          | carboxypeptidase A2, pancreatic                                                                                                      | 1.05 | 6.00E-05 |
| 71963.00     | Cdca4         | cell division cycle associated 4                                                                                                     | 1.05 | 1.10E-05 |
| 71963.00     | Cdca4         | cell division cycle associated 4                                                                                                     | 1.05 | 5.80E-06 |
| 12443.00     | Cnd1          | cyclin D1                                                                                                                            | 1.05 | 0.00023  |
| 71735.00     | Lrwd1         | leucine-rich repeats and WD repeat domain containing 1                                                                               | 1.05 | 1.10E-05 |
| 15547.00     | Trmt2a        | TRM2 tRNA methyltransferase 2 homolog A ( <i>S. cerevisiae</i> )                                                                     | 1.04 | 6.20E-05 |
| 21681.00     | Thoc4         | THO complex 4                                                                                                                        | 1.04 | 2.30E-05 |
| 20425.00     | Shmt1         | serine hydroxymethyltransferase 1 (soluble)                                                                                          | 1.04 | 0.00085  |
| 19361.00     | Rad51         | RAD51 homolog ( <i>S. cerevisiae</i> )                                                                                               | 1.04 | 0.0061   |
| 18637.00     | Pfdn2         | prefoldin 2                                                                                                                          | 1.04 | 1.60E-05 |
| 52683.00     | Ncaph2        | non-SMC condensin II complex, subunit H2                                                                                             | 1.04 | 1.30E-05 |
| 66902.00     | Mtap          | methylthioadenosine phosphorylase                                                                                                    | 1.04 | 3.00E-04 |
| 224092.00    | Lsg1          | large subunit GTPase 1 homolog ( <i>S. cerevisiae</i> )                                                                              | 1.04 | 8.90E-06 |
| 192170.00    | Eif4a3        | eukaryotic translation initiation factor 4A3                                                                                         | 1.04 | 0.00039  |
| 74747.00     | Ddit4         | DNA-damage-inducible transcript 4                                                                                                    | 1.04 | 0.0011   |
| 12236.00     | Bub1b         | budding uninhibited by benzimidazoles 1 homolog, beta ( <i>S. cerevisiae</i> )                                                       | 1.04 | 0.00036  |
| 27078.00     | B9d1          | B9 protein domain 1                                                                                                                  | 1.04 | 5.10E-05 |
| 17025.00     | ILMN_215056   | <i>Mus musculus</i> aminolevulinate, delta-, dehydratase (Alad), mRNA.                                                               | 1.04 | 7.50E-05 |
| 217737.00    | Ahsa1         | AHA1, activator of heat shock protein ATPase homolog 1 (yeast)                                                                       | 1.04 | 6.80E-06 |
| 66976.00     | ILMN_212730   | <i>Mus musculus</i> RIKEN cDNA 2410002F23 gene (2410002F23Rik), mRNA.                                                                | 1.04 | 0.00045  |
| 68964.00     | 1500010J02Rik | RIKEN cDNA 1500010J02 gene                                                                                                           | 1.04 | 1.10E-06 |
| 57315.00     | Wdr46         | WD repeat domain 46                                                                                                                  | 1.03 | 0.00013  |
| 21926.00     | Tnf           | tumor necrosis factor                                                                                                                | 1.03 | 0.0064   |
| 30056.00     | Timm9         | translocase of inner mitochondrial membrane 9 homolog (yeast)                                                                        | 1.03 | 1.60E-05 |
| 116914.00    | Slc19a2       | solute carrier family 19 (thiamine transporter), member 2                                                                            | 1.03 | 0.0034   |
| 214791.00    | Sertad4       | SERTA domain containing 4                                                                                                            | 1.03 | 1.00E-04 |
| 68275.00     | Rpa1          | replication protein A1                                                                                                               | 1.03 | 3.00E-06 |
| 19227.00     | Pthlh         | parathyroid hormone-like peptide                                                                                                     | 1.03 | 6.60E-06 |
| 93737.00     | Pard6g        | par-6 partitioning defective 6 homolog gamma ( <i>C. elegans</i> )                                                                   | 1.03 | 2.10E-05 |

|              |               |                                                                                                                 |       |          |
|--------------|---------------|-----------------------------------------------------------------------------------------------------------------|-------|----------|
| 100609.00    | Nsun5         | NOL1/NOP2/Sun domain family, member 5                                                                           | 1.03  | 2.90E-05 |
| 56150.00     | Mad211        | MAD2 mitotic arrest deficient-like 1 (yeast)                                                                    | 1.03  | 1.70E-06 |
| 72500.00     | ILMN_225633   | Mus musculus immediate early response 5-like (Ier5l), mRNA.                                                     | 1.03  | 9.30E-06 |
| 319170.00    | Hist1h2an     | histone cluster 1, H2an                                                                                         | 1.03  | 0.012    |
| 276770.00    | Eif5a         | eukaryotic translation initiation factor 5A                                                                     | 1.03  | 4.00E-05 |
| 230917.00    | Tmem201       | transmembrane protein 201                                                                                       | 1.02  | 2.80E-05 |
| 66525.00     | Timm50        | translocase of inner mitochondrial membrane 50 homolog (yeast)                                                  | 1.02  | 2.00E-04 |
| 56403.00     | Syncrip       | synaptotagmin binding, cytoplasmic RNA interacting protein                                                      | 1.02  | 4.40E-05 |
| 66506.00     | Psmg3         | proteasome (prosome, macropain) assembly chaperone 3                                                            | 1.02  | 1.30E-05 |
| 20019.00     | Polr1a        | polymerase (RNA) I polypeptide A                                                                                | 1.02  | 4.90E-05 |
| 69912.00     | Nup43         | nucleoporin 43                                                                                                  | 1.02  | 4.50E-06 |
| 216443.00    | Mars          | methionine-tRNA synthetase                                                                                      | 1.02  | 0.00092  |
| 319169.00    | Hist1h2ak     | histone cluster 1, H2ak                                                                                         | 1.02  | 0.0081   |
| 107435.00    | Hat1          | histone aminotransferase 1                                                                                      | 1.02  | 2.60E-05 |
| 14297.00     | Fxn           | frataxin                                                                                                        | 1.02  | 2.80E-05 |
| 20624.00     | Eftud2        | elongation factor Tu GTP binding domain containing 2                                                            | 1.02  | 9.60E-06 |
| 228889.00    | Ddx27         | DEAD (Asp-Glu-Ala-Asp) box polypeptide 27                                                                       | 1.02  | 2.80E-05 |
| 108912.00    | Cdca2         | cell division cycle associated 2                                                                                | 1.02  | 7.90E-05 |
| 76813.00     | ILMN_230074   | Mus musculus armadillo repeat containing 6 (Armc6), mRNA.                                                       | 1.02  | 0.00014  |
| 11564.00     | Adsl          | adenylosuccinate lyase                                                                                          | 1.02  | 0.00012  |
| 72061.00     | 2010111I01Rik | RIKEN cDNA 2010111I01 gene                                                                                      | 1.02  | 1.20E-05 |
| 21877.00     | Tk1           | thymidine kinase 1                                                                                              | 1.01  | 0.0012   |
| 20621.00     | Snn           | stannin                                                                                                         | 1.01  | 0.0026   |
| 435684.00    | ILMN_245068   | Mus musculus Src homology 2 domain containing F (Shf), mRNA.                                                    | 1.01  | 0.0033   |
| 16912.00     | Psmb9         | proteasome (prosome, macropain) subunit, beta type 9 (large multifunctional peptidase 2)                        | 1.01  | 0.04     |
| 445007.00    | Nup85         | nucleoporin 85                                                                                                  | 1.01  | 0.0057   |
| 217011.00    | ILMN_239279   | Mus musculus notchless homolog 1 (Drosophila) (Nle1), mRNA.                                                     | 1.01  | 0.0017   |
| 66973.00     | ILMN_252778   | Mus musculus mitochondrial ribosomal protein S18B (Mrps18b), nuclear gene encoding mitochondrial protein, mRNA. | 1.01  | 0.00035  |
| 14793.00     | Cdca3         | cell division cycle associated 3                                                                                | 1.01  | 0.00055  |
| 215193.00    | Diexf         | digestive organ expansion factor homolog (zebrafish)                                                            | 1.01  | 5.50E-05 |
| 319278.00    | A230050P20Rik | RIKEN cDNA A230050P20 gene                                                                                      | 1.01  | 0.0013   |
| 66356.00     | 2310008H09Rik | RIKEN cDNA 2310008H09 gene                                                                                      | 1.01  | 6.60E-06 |
| 22793.00     | Zyx           | zyxin                                                                                                           | 1     | 0.0011   |
| 232187.00    | Smyd5         | SET and MYND domain containing 5                                                                                | 1     | 0.00095  |
| 19355.00     | Rad1          | RAD1 homolog (S. pombe)                                                                                         | 1     | 1.00E-04 |
| 214572.00    | Prmt7         | protein arginine N-methyltransferase 7                                                                          | 1     | 1.90E-05 |
| 68106.00     | Nt5c3l        | 5'-nucleotidase, cytosolic III-like                                                                             | 1     | 0.00013  |
| 16319.00     | Incenp        | inner centromere protein                                                                                        | 1     | 0.00032  |
| 55927.00     | Hes6          | hairy and enhancer of split 6 (Drosophila)                                                                      | 1     | 0.00015  |
| 29870.00     | Gtse1         | G two S phase expressed protein 1                                                                               | 1     | 0.002    |
| 67112.00     | Fgf22         | fibroblast growth factor 22                                                                                     | 1     | 0.00015  |
| 69524.00     | Esam          | endothelial cell-specific adhesion molecule                                                                     | 1     | 0.00018  |
| 27979.00     | Eif3b         | eukaryotic translation initiation factor 3, subunit B                                                           | 1     | 0.00026  |
| 381903.00    | Alg8          | asparagine-linked glycosylation 8 homolog (yeast, alpha-1,3-glucosyltransferase)                                | 1     | 0.00079  |
| 223921.00    | Aaas          | achalasia, adrenocortical insufficiency, alacrimia                                                              | 1     | 0.00036  |
| 277414.00    | Trp53i11      | transformation related protein 53 inducible protein 11                                                          | -1    | 0.00048  |
| 229731.00    | Slc25a24      | solute carrier family 25 (mitochondrial carrier, phosphate carrier), member 24                                  | -1    | 0.00054  |
| 67874.00     | Rprm          | reprimin, TP53 dependent G2 arrest mediator candidate                                                           | -1    | 0.00025  |
| 100047353.00 | ILMN_212740   | PREDICTED: Mus musculus similar to myocardial vascular inhibition factor (LOC100047353), mRNA.                  | -1    | 0.00029  |
| 100047173.00 | ILMN_214714   | PREDICTED: Mus musculus similar to synaptotagmin-like 1 (LOC100047173), misc RNA.                               | -1    | 1.60E-05 |
| 16196.00     | Il7           | interleukin 7                                                                                                   | -1    | 0.002    |
| 93842.00     | Igsf9         | immunoglobulin superfamily, member 9                                                                            | -1    | 0.0012   |
| 15484.00     | Hsd11b2       | hydroxysteroid 11-beta dehydrogenase 2                                                                          | -1    | 0.013    |
| 14674.00     | Gna13         | guanine nucleotide binding protein, alpha 13                                                                    | -1    | 0.0047   |
| 14367.00     | Fzd5          | frizzled homolog 5 (Drosophila)                                                                                 | -1    | 0.00015  |
| 105387.00    | Akr1c14       | aldo-keto reductase family 1, member C14                                                                        | -1    | 5.40E-05 |
| 11522.00     | Adh1          | alcohol dehydrogenase 1 (class I)                                                                               | -1    | 0.016    |
| 53330.00     | Vamp4         | vesicle-associated membrane protein 4                                                                           | -1.01 | 2.90E-05 |
| 223697.00    | Sun2          | Sad1 and UNC84 domain containing 2                                                                              | -1.01 | 0.0037   |
| 20482.00     | Skil          | SKI-like                                                                                                        | -1.01 | 0.0063   |
| 224860.00    | Plcl2         | phospholipase C-like 2                                                                                          | -1.01 | 1.90E-05 |
| 224938.00    | Pja2          | praja 2, RING-H2 motif containing                                                                               | -1.01 | 0.00017  |
| 102103.00    | Mtus1         | mitochondrial tumor suppressor 1                                                                                | -1.01 | 0.00014  |
| 64095.00     | Gpr35         | G protein-coupled receptor 35                                                                                   | -1.01 | 0.003    |
| 71946.00     | Endod1        | endonuclease domain containing 1                                                                                | -1.01 | 1.90E-05 |
| 171168.00    | Acer1         | alkaline ceramidase 1                                                                                           | -1.01 | 0.00046  |
| 208117.00    | Aph1b         | anterior pharynx defective 1b homolog (C. elegans)                                                              | -1.01 | 0.0053   |
| 66395.00     | Ahnak         | AHNAK nucleoprotein (desmoyokin)                                                                                | -1.01 | 0.00061  |

|              |               |                                                                                                                                             |       |          |
|--------------|---------------|---------------------------------------------------------------------------------------------------------------------------------------------|-------|----------|
| 18400.00     | Slc22a18      | solute carrier family 22 (organic cation transporter), member 18                                                                            | -1.02 | 1.10E-05 |
| 24057.00     | Sh3yl1        | Sh3 domain YSC-like 1                                                                                                                       | -1.02 | 1.50E-05 |
| 71601.00     | ILMN_213888   | Mus musculus CEA-related cell adhesion molecule 20 (Ceacam20), mRNA.                                                                        | -1.02 | 0.0049   |
| 11364.00     | Acadm         | acyl-Coenzyme A dehydrogenase, medium chain                                                                                                 | -1.02 | 1.30E-06 |
| 98267.00     | Stk17b        | serine/threonine kinase 17b (apoptosis-inducing)                                                                                            | -1.03 | 0.0011   |
| 216233.00    | Socs2         | suppressor of cytokine signaling 2                                                                                                          | -1.03 | 0.0015   |
| 69693.00     | Pof1b         | premature ovarian failure 1B                                                                                                                | -1.03 | 3.80E-05 |
| 217166.00    | Nr1d1         | nuclear receptor subfamily 1, group D, member 1                                                                                             | -1.03 | 0.0019   |
| 83965.00     | Enpp5         | ectonucleotide pyrophosphatase/phosphodiesterase 5                                                                                          | -1.03 | 3.80E-05 |
| 170752.00    | Bco2          | beta-carotene oxygenase 2                                                                                                                   | -1.03 | 0.0047   |
| 73910.00     | Arhgap18      | Rho GTPase activating protein 18                                                                                                            | -1.03 | 0.0011   |
| 11735.00     | Ank3          | ankyrin 3, epithelial                                                                                                                       | -1.03 | 0.0033   |
| 104776.00    | Aldh6a1       | aldehyde dehydrogenase family 6, subfamily A1                                                                                               | -1.03 | 0.0018   |
| 239559.00    | A4galt        | alpha 1,4-galactosyltransferase                                                                                                             | -1.03 | 2.40E-07 |
| 66753.00     | Erlec1        | endoplasmic reticulum lectin 1                                                                                                              | -1.03 | 3.00E-05 |
| 67171.00     | Dram2         | VDNA-damage regulated autophagy modulator 2                                                                                                 | -1.04 | 0.00019  |
| 56374.00     | Tmem59        | transmembrane protein 59                                                                                                                    | -1.04 | 0.00014  |
| 233724.00    | Tmem41b       | transmembrane protein 41B                                                                                                                   | -1.04 | 0.0011   |
| 20356.00     | Sema5a        | sema domain, seven thrombospondin repeats (type 1 and type 1-like), transmembrane domain (TM) and short cytoplasmic domain, (semaphorin) 5A | -1.04 | 0.0015   |
| 65970.00     | Lima1         | LIM domain and actin binding 1                                                                                                              | -1.04 | 0.0053   |
| 66809.00     | Krt20         | keratin 20                                                                                                                                  | -1.04 | 0.007    |
| 319190.00    | ILMN_213471   | Mus musculus histone cluster 2, H2be (Hist2h2be), mRNA.                                                                                     | -1.04 | 8.00E-04 |
| 74155.00     | Errfi1        | ERBB receptor feedback inhibitor 1                                                                                                          | -1.04 | 0.00035  |
| 66273.00     | 1810020D17Rik | RIKEN cDNA 1810020D17 gene                                                                                                                  | -1.04 | 0.00023  |
| 100727.00    | Ug2b34        | UDP glucuronosyltransferase 2 family, polypeptide B34                                                                                       | -1.05 | 0.0087   |
| 67043.00     | Syap1         | synapse associated protein 1                                                                                                                | -1.05 | 0.00011  |
| 217463.00    | Snx13         | sorting nexin 13                                                                                                                            | -1.05 | 0.0016   |
| 19885.00     | Rorc          | RAR-related orphan receptor gamma                                                                                                           | -1.05 | 0.018    |
| 245867.00    | Pcmd2         | protein-L-isoaspartate (D-aspartate) O-methyltransferase domain containing 2                                                                | -1.05 | 0.00071  |
| 26424.00     | Nr5a2         | nuclear receptor subfamily 5, group A, member 2                                                                                             | -1.05 | 0.00036  |
| 223646.00    | Naprt1        | nicotinate phosphoribosyltransferase domain containing 1                                                                                    | -1.05 | 0.0062   |
| 100046056.00 | ILMN_192265   | PREDICTED: Mus musculus similar to Pre-B-cell leukemia transcription factor interacting protein 1 (LOC100046056), mRNA.                     | -1.05 | 0.005    |
| 75686.00     | Nudt16        | nudix (nucleoside diphosphate linked moiety X)-type motif 16                                                                                | -1.05 | 0.00011  |
| 319186.00    | Hist1h2bm     | histone cluster 1, H2bm                                                                                                                     | -1.05 | 0.00016  |
| 13360.00     | Dhcr7         | 7-dehydrocholesterol reductase                                                                                                              | -1.05 | 0.0017   |
| 13063.00     | Cycs          | cytochrome c, somatic                                                                                                                       | -1.05 | 9.00E-05 |
| 66813.00     | ILMN_244180   | Mus musculus Bcl2-like 14 (apoptosis facilitator) (Bcl2l14), mRNA.                                                                          | -1.05 | 0.0016   |
| 223631.00    | ILMN_209571   | Mus musculus cDNA sequence BC025446 (BC025446), mRNA.                                                                                       | -1.05 | 0.0056   |
| 17940.00     | Naip1         | NLR family, apoptosis inhibitory protein 1                                                                                                  | -1.06 | 0.0013   |
| 100047937.00 | ILMN_219033   | PREDICTED: Mus musculus similar to Aldehyde dehydrogenase 1 family, member L1 (LOC100047937), mRNA.                                         | -1.06 | 4.60E-05 |
| 13105.00     | Cyp2d9        | cytochrome P450, family 2, subfamily d, polypeptide 9                                                                                       | -1.06 | 0.0092   |
| 104086.00    | Cyp27a1       | cytochrome P450, family 27, subfamily a, polypeptide 1                                                                                      | -1.06 | 0.0034   |
| 83429.00     | Ctns          | cystinosis, nephropathic                                                                                                                    | -1.06 | 0.00056  |
| 71908.00     | Cldn23        | claudin 23                                                                                                                                  | -1.06 | 4.20E-05 |
| 12724.00     | Clcn2         | chloride channel 2                                                                                                                          | -1.06 | 1.00E-05 |
| 107747.00    | ILMN_219033   | Mus musculus aldehyde dehydrogenase 1 family, member L1 (Aldh1l1), mRNA.                                                                    | -1.06 | 0.00011  |
| 66753.00     | Erlec1        | endoplasmic reticulum lectin 1                                                                                                              | -1.06 | 9.60E-06 |
| 94224.00     | Srd5a2        | steroid 5 alpha-reductase 2                                                                                                                 | -1.07 | 1.40E-05 |
| 329416.00    | Nostrin       | nitric oxide synthase trafficker                                                                                                            | -1.07 | 0.00092  |
| 17961.00     | Nat2          | N-acetyltransferase 2 (arylamine N-acetyltransferase)                                                                                       | -1.07 | 0.00029  |
| 99663.00     | Clca6         | chloride channel calcium activated 6                                                                                                        | -1.07 | 0.025    |
| 26365.00     | Ceacam1       | carcinoembryonic antigen-related cell adhesion molecule 1                                                                                   | -1.07 | 0.02     |
| 353170.00    | ILMN_247686   | Mus musculus RIKEN cDNA 4932441K18 gene (4932441K18Rik), mRNA.                                                                              | -1.07 | 4.20E-05 |
| 22248.00     | Unc119        | unc-119 homolog (C. elegans)                                                                                                                | -1.08 | 8.90E-06 |
| 54683.00     | Prdx5         | peroxiredoxin 5                                                                                                                             | -1.08 | 0.00049  |
| 67801.00     | Plp           | plasma membrane proteolipid                                                                                                                 | -1.08 | 0.0035   |
| 226971.00    | Pleckhb2      | pleckstrin homology domain containing, family B (evectins) member 2                                                                         | -1.08 | 2.30E-05 |
| 54484.00     | Mkrl1         | makorin, ring finger protein, 1                                                                                                             | -1.08 | 0.00095  |
| 100046781.00 | ILMN_220554   | PREDICTED: Mus musculus similar to carboxypeptidase D (LOC100046781), mRNA.                                                                 | -1.08 | 0.014    |
| 85308.00     | Fam158a       | family with sequence similarity 158, member A                                                                                               | -1.08 | 0.0011   |
| 13511.00     | Dsg2          | desmoglein 2                                                                                                                                | -1.08 | 0.00029  |
| 68778.00     | 1110038D17Rik | RIKEN cDNA 1110038D17 gene                                                                                                                  | -1.08 | 6.30E-07 |
| 225997.00    | Trpm6         | transient receptor potential cation channel, subfamily M, member 6                                                                          | -1.09 | 0.00014  |
| 72948.00     | Tppp          | tubulin polymerization promoting protein                                                                                                    | -1.09 | 3.50E-05 |
| 19241.00     | ILMN_196070   | Mus musculus thymosin, beta 4, X chromosome (Tmsb4x), mRNA.                                                                                 | -1.09 | 1.70E-05 |
| 20866.00     | ILMN_221367   | Mus musculus stromal interaction molecule 1 (Stim1), mRNA.                                                                                  | -1.09 | 2.50E-06 |
| 102693.00    | Phldb1        | pleckstrin homology-like domain, family B, member 1                                                                                         | -1.09 | 0.0019   |
| 18627.00     | Per2          | period homolog 2 (Drosophila)                                                                                                               | -1.09 | 0.0027   |

|              |               |                                                                                                                                 |       |          |
|--------------|---------------|---------------------------------------------------------------------------------------------------------------------------------|-------|----------|
| 54405.00     | Ndufa1        | NADH dehydrogenase (ubiquinone) 1 alpha subcomplex, 1                                                                           | -1.09 | 0.00016  |
| 105559.00    | Mbnl2         | muscleblind-like 2                                                                                                              | -1.09 | 4.40E-05 |
| 100048721.00 | ILMN_210479   | PREDICTED: Mus musculus similar to fibronectin leucine rich transmembrane protein 3, transcript variant 1 (LOC100048721), mRNA. | -1.09 | 0.00074  |
| 57890.00     | Il17re        | interleukin 17 receptor E                                                                                                       | -1.09 | 0.0014   |
| 212070.00    | Clrn3         | clarin 3                                                                                                                        | -1.09 | 4.00E-04 |
| 76960.00     | Bcas1         | breast carcinoma amplified sequence 1                                                                                           | -1.09 | 2.80E-05 |
| 21934.00     | Tnfrsf11a     | tumor necrosis factor receptor superfamily, member 11a                                                                          | -1.1  | 1.70E-05 |
| 21416.00     | Tcf7l2        | transcription factor 7-like 2, T-cell specific, HMG-box                                                                         | -1.1  | 1.50E-05 |
| 54381.00     | Pgcp          | plasma glutamate carboxypeptidase                                                                                               | -1.1  | 0.0011   |
| 170761.00    | Pdzd3         | PDZ domain containing 3                                                                                                         | -1.1  | 0.0026   |
| 18003.00     | Nedd9         | neural precursor cell expressed, developmentally down-regulated gene 9                                                          | -1.1  | 0.00059  |
| 26931.00     | Ppp2r5c       | protein phosphatase 2, regulatory subunit B (B56), gamma isoform                                                                | -1.1  | 0.00012  |
| 83379.00     | Klb           | klotho beta                                                                                                                     | -1.1  | 2.60E-06 |
| 68024.00     | Hist1h2bc     | histone cluster 1, H2bc                                                                                                         | -1.1  | 0.00092  |
| 23882.00     | Gadd45g       | growth arrest and DNA-damage-inducible 45 gamma                                                                                 | -1.1  | 0.0017   |
| 11732.00     | Ank           | progressive ankylosis                                                                                                           | -1.1  | 0.00037  |
| 107652.00    | Uap1          | UDP-N-acetylglucosamine pyrophosphorylase 1                                                                                     | -1.11 | 0.002    |
| 11891.00     | Rab27a        | RAB27A, member RAS oncogene family                                                                                              | -1.11 | 6.60E-06 |
| 213522.00    | Plekhg6       | pleckstrin homology domain containing, family G (with RhoGef domain) member 6                                                   | -1.11 | 0.00082  |
| 53880.00     | ILMN_230036   | Mus musculus NLR family, apoptosis inhibitory protein 7 (Naip7), mRNA.                                                          | -1.11 | 0.00011  |
| 16664.00     | Krt14         | keratin 14                                                                                                                      | -1.11 | 0.013    |
| 102871.00    | D330045A20Rik | RIKEN cDNA D330045A20 gene                                                                                                      | -1.11 | 0.00035  |
| 75415.00     | Arhgap12      | Rho GTPase activating protein 12                                                                                                | -1.11 | 5.10E-05 |
| 71874.00     | 2310007B03Rik | RIKEN cDNA 2310007B03 gene                                                                                                      | -1.11 | 2.00E-04 |
| 20394.00     | Scg5          | secretogranin V                                                                                                                 | -1.12 | 6.10E-05 |
| 11852.00     | Rhob          | ras homolog gene family, member B                                                                                               | -1.12 | 0.00047  |
| 18858.00     | Pmp22         | peripheral myelin protein 22                                                                                                    | -1.12 | 0.012    |
| 71801.00     | Plekhf2       | pleckstrin homology domain containing, family F (with FYVE domain) member 2                                                     | -1.12 | 0.0097   |
| 13139.00     | Dgka          | diacylglycerol kinase, alpha                                                                                                    | -1.12 | 8.70E-05 |
| 23971.00     | Papss1        | 3'-phosphoadenosine 5'-phosphosulfate synthase 1                                                                                | -1.13 | 1.70E-06 |
| 107589.00    | Mylk          | myosin, light polypeptide kinase                                                                                                | -1.13 | 0.0029   |
| 100044862.00 | ILMN_221289   | PREDICTED: Mus musculus similar to Fbx13 protein (LOC100044862), mRNA.                                                          | -1.13 | 0.00035  |
| 16478.00     | Jund          | Jun proto-oncogene related gene d                                                                                               | -1.13 | 0.0026   |
| 57890.00     | Il17re        | interleukin 17 receptor E                                                                                                       | -1.13 | 3.80E-05 |
| 66822.00     | Fbxo25        | F-box protein 25                                                                                                                | -1.13 | 3.00E-04 |
| 13139.00     | Dgka          | diacylglycerol kinase, alpha                                                                                                    | -1.13 | 2.30E-05 |
| 67095.00     | Trak1         | trafficking protein, kinesin binding 1                                                                                          | -1.14 | 1.10E-05 |
| 22134.00     | Tgoln1        | trans-golgi network protein                                                                                                     | -1.14 | 3.10E-05 |
| 50776.00     | Polg2         | polymerase (DNA directed), gamma 2, accessory subunit                                                                           | -1.14 | 0.00019  |
| 223646.00    | Naprt1        | nicotinate phosphoribosyltransferase domain containing 1                                                                        | -1.14 | 0.00012  |
| 14063.00     | F2r1l         | coagulation factor II (thrombin) receptor-like 1                                                                                | -1.14 | 0.0016   |
| 212483.00    | Fam193b       | family with sequence similarity 193, member B                                                                                   | -1.14 | 0.00019  |
| 56643.00     | Slc15a1       | solute carrier family 15 (oligopeptide transporter), member 1                                                                   | -1.15 | 0.02     |
| 66824.00     | ILMN_223398   | Mus musculus PYD and CARD domain containing (Pycard), mRNA.                                                                     | -1.15 | 0.00014  |
| 59030.00     | Mkks          | McKusick-Kaufman syndrome protein                                                                                               | -1.15 | 1.80E-06 |
| 16168.00     | Il15          | interleukin 15                                                                                                                  | -1.15 | 2.30E-05 |
| 384009.00    | Glipr2        | GLI pathogenesis-related 2                                                                                                      | -1.15 | 0.0033   |
| 380711.00    | Rap1gap2      | RAP1 GTPase activating protein 2                                                                                                | -1.15 | 3.00E-06 |
| 74754.00     | Dhcr24        | 24-dehydrocholesterol reductase                                                                                                 | -1.15 | 0.0017   |
| 66298.00     | Defa21        | defensin, alpha, 21                                                                                                             | -1.15 | 0.019    |
| 12457.00     | ILMN_208982   | Mus musculus CCR4 carbon catabolite repression 4-like (S. cerevisiae) (Ccrn4l), mRNA.                                           | -1.15 | 0.0029   |
| 66264.00     | Ccdc28b       | coiled coil domain containing 28B                                                                                               | -1.15 | 0.00041  |
| 76527.00     | Il34          | interleukin 34                                                                                                                  | -1.15 | 7.90E-07 |
| 109637.00    | Upk1a         | uroplakin 1A                                                                                                                    | -1.16 | 7.30E-05 |
| 209760.00    | Tmc7          | transmembrane channel-like gene family 7                                                                                        | -1.16 | 0.00082  |
| 20755.00     | ILMN_215269   | Mus musculus small proline-rich protein 2A (Sprr2a), mRNA.                                                                      | -1.16 | 5.30E-06 |
| 72002.00     | Slc39a5       | solute carrier family 39 (metal ion transporter), member 5                                                                      | -1.16 | 4.00E-05 |
| 108079.00    | Prkaa2        | protein kinase, AMP-activated, alpha 2 catalytic subunit                                                                        | -1.16 | 6.20E-05 |
| 23954.00     | Nek3          | NIMA (never in mitosis gene a)-related expressed kinase 3                                                                       | -1.16 | 1.30E-05 |
| 228576.00    | Mall          | mal, T-cell differentiation protein-like                                                                                        | -1.16 | 0.0011   |
| 20216.00     | Acsm3         | acyl-CoA synthetase medium-chain family member 3                                                                                | -1.16 | 2.60E-05 |
| 53376.00     | Usp2          | ubiquitin specific peptidase 2                                                                                                  | -1.17 | 0.00018  |
| 14605.00     | Tsc22d3       | TSC22 domain family, member 3                                                                                                   | -1.17 | 0.00019  |
| 64177.00     | Trpv6         | transient receptor potential cation channel, subfamily V, member 6                                                              | -1.17 | 0.0016   |
| 170756.00    | ILMN_214023   | Mus musculus solute carrier family 24 (sodium/potassium/calcium exchanger), member 6 (Slc24a6), mRNA.                           | -1.17 | 0.00078  |
| 76108.00     | Rap2a         | RAS related protein 2a                                                                                                          | -1.17 | 0.00029  |
| 76787.00     | Ppfi3         | protein tyrosine phosphatase, receptor type, f polypeptide (PTPRF), interacting protein (liprin), alpha 3                       | -1.17 | 0.00095  |
| 17190.00     | Mbd1          | methyl-CpG binding domain protein 1                                                                                             | -1.17 | 1.60E-05 |



|           |               |                                                                                                                              |       |          |
|-----------|---------------|------------------------------------------------------------------------------------------------------------------------------|-------|----------|
| 212307.00 | Mapre2        | microtubule-associated protein, RP/EB family, member 2                                                                       | -1.17 | 1.60E-05 |
| 56486.00  | Gabarap       | gamma-aminobutyric acid receptor associated protein                                                                          | -1.17 | 4.90E-06 |
| 245038.00 | Dclk3         | doublecortin-like kinase 3                                                                                                   | -1.17 | 4.60E-05 |
| 12653.00  | Chgb          | chromogranin B                                                                                                               | -1.17 | 2.30E-05 |
| 110595.00 | Timp4         | tissue inhibitor of metalloproteinase 4                                                                                      | -1.18 | 3.50E-05 |
| 72002.00  | Slc39a5       | solute carrier family 39 (metal ion transporter), member 5                                                                   | -1.18 | 0.002    |
| 67709.00  | Reg4          | regenerating islet-derived family, member 4                                                                                  | -1.18 | 0.002    |
| 71664.00  | Mettl7b       | methyltransferase like 7B                                                                                                    | -1.18 | 0.002    |
| 16529.00  | Kcnk5         | potassium channel, subfamily K, member 5                                                                                     | -1.18 | 6.20E-05 |
| 77996.00  | D730039F16Rik | RIKEN cDNA D730039F16 gene                                                                                                   | -1.18 | 5.00E-04 |
| 269336.00 | Ccdc32        | coiled-coil domain containing 32                                                                                             | -1.18 | 5.60E-07 |
| 20730.00  | Spink3        | serine peptidase inhibitor, Kazal type 3                                                                                     | -1.19 | 0.0053   |
| 18799.00  | Plcd1         | phospholipase C, delta 1                                                                                                     | -1.19 | 0.00014  |
| 16601.00  | Klf9          | Kruppel-like factor 9                                                                                                        | -1.19 | 0.0037   |
| 16598.00  | Klf2          | Kruppel-like factor 2 (lung)                                                                                                 | -1.19 | 0.0076   |
| 69718.00  | Ipmk          | inositol polyphosphate multikinase                                                                                           | -1.19 | 4.90E-06 |
| 380921.00 | Dgkh          | diacylglycerol kinase, eta                                                                                                   | -1.19 | 3.60E-07 |
| 12684.00  | Cideb         | cell death-inducing DNA fragmentation factor, alpha subunit-like effector B                                                  | -1.19 | 0.00016  |
| 67064.00  | Chmp1b        | chromatin modifying protein 1B                                                                                               | -1.19 | 8.30E-05 |
| 381175.00 | Ccdc68        | coiled-coil domain containing 68                                                                                             | -1.19 | 0.0029   |
| 12226.00  | ILMN_212740   | Mus musculus B-cell translocation gene 1, anti-proliferative (Btg1), mRNA.                                                   | -1.19 | 1.00E-05 |
| 72361.00  | ILMN_219691   | Mus musculus RIKEN cDNA 2210023G05 gene (2210023G05Rik), mRNA.                                                               | -1.19 | 6.70E-05 |
| 21807.00  | Tsc22d1       | TSC22 domain family, member 1                                                                                                | -1.2  | 0.00034  |
| 18753.00  | Prkcd         | protein kinase C, delta                                                                                                      | -1.2  | 4.40E-07 |
| 228983.00 | Osbpl2        | oxysterol binding protein-like 2                                                                                             | -1.2  | 9.20E-08 |
| 668837.00 | ILMN_207496   | PREDICTED: Mus musculus similar to ATP synthase, H+ transporting, mitochondrial F0 complex, subunit G (LOC668837), misc RNA. | -1.2  | 0.00047  |
| 15212.00  | Hexb          | hexosaminidase B                                                                                                             | -1.2  | 0.00041  |
| 223706.00 | Cyp2d34       | cytochrome P450, family 2, subfamily d, polypeptide 34                                                                       | -1.2  | 0.0013   |
| 12452.00  | Ccng2         | cyclin G2                                                                                                                    | -1.2  | 0.0033   |
| 223631.00 | ILMN_209571   | Mus musculus cDNA sequence BC025446 (BC025446), mRNA.                                                                        | -1.2  | 0.00046  |
| 19123.00  | Proc          | protein C                                                                                                                    | -1.21 | 0.00017  |
| 260409.00 | Cdc42ep3      | CDC42 effector protein (Rho GTPase binding) 3                                                                                | -1.21 | 0.0025   |
| 69787.00  | Anxa13        | annexin A13                                                                                                                  | -1.21 | 0.0049   |
| 27360.00  | Add3          | adducin 3 (gamma)                                                                                                            | -1.21 | 4.20E-05 |
| 107723.00 | Slc12a6       | solute carrier family 12, member 6                                                                                           | -1.22 | 7.60E-06 |
| 223646.00 | Naprt1        | nicotinate phosphoribosyltransferase domain containing 1                                                                     | -1.22 | 0.00011  |
| 239217.00 | Kctd12        | potassium channel tetramerisation domain containing 12                                                                       | -1.22 | 1.90E-05 |
| 16168.00  | Il15          | interleukin 15                                                                                                               | -1.22 | 0.00022  |
| 53897.00  | Gal3st1       | galactose-3-O-sulfotransferase 1                                                                                             | -1.22 | 0.00015  |
| 78252.00  | Fam55b        | family with sequence similarity 55, member B                                                                                 | -1.22 | 0.0047   |
| 20443.00  | St3gal4       | ST3 beta-galactoside alpha-2,3-sialyltransferase 4                                                                           | -1.23 | 0.0012   |
| 18574.00  | Pde1b         | phosphodiesterase 1B, Ca2+-calmodulin dependent                                                                              | -1.23 | 0.00012  |
| 105559.00 | Mbnl2         | muscleblind-like 2                                                                                                           | -1.23 | 1.80E-05 |
| 12409.00  | Cbr2          | carbonyl reductase 2                                                                                                         | -1.23 | 0.00047  |
| 12351.00  | Car4          | carbonic anhydrase 4                                                                                                         | -1.23 | 0.0012   |
| 230163.00 | Aldob         | aldolase B, fructose-bisphosphate                                                                                            | -1.23 | 0.003    |
| 238330.00 | ILMN_230817   | Mus musculus RIKEN cDNA 6430527G18 gene (6430527G18Rik), mRNA.                                                               | -1.23 | 0.00018  |
| 67198.00  | Spats2l       | spermatogenesis associated, serine-rich 2-like                                                                               | -1.23 | 0.00068  |
| 52357.00  | Wwc2          | WW, C2 and coiled-coil domain containing 2                                                                                   | -1.24 | 0.00049  |
| 11853.00  | Rhoc          | ras homolog gene family, member C                                                                                            | -1.24 | 0.00011  |
| 109731.00 | Maob          | monoamine oxidase B                                                                                                          | -1.24 | 0.002    |
| 20238.00  | Atxn1         | ataxin 1                                                                                                                     | -1.24 | 5.80E-05 |
| 70113.00  | Odf3b         | outer dense fiber of sperm tails 3B                                                                                          | -1.24 | 4.70E-06 |
| 16581.00  | Kifc2         | kinesin family member C2                                                                                                     | -1.25 | 1.40E-05 |
| 382571.00 | ILMN_188365   | Mus musculus potassium voltage-gated channel, subfamily F, member 1 (Kcnf1), mRNA.                                           | -1.25 | 0.00073  |
| 93692.00  | Glrx          | glutaredoxin                                                                                                                 | -1.25 | 1.30E-05 |
| 13819.00  | Epas1         | endothelial PAS domain protein 1                                                                                             | -1.25 | 8.00E-06 |
| 13040.00  | Ctss          | cathepsin S                                                                                                                  | -1.25 | 0.0017   |
| 53422.00  | ILMN_196190   | Mus musculus Y box protein 2 (Ybx2), mRNA.                                                                                   | -1.26 | 9.60E-05 |
| 76273.00  | Ndfip2        | Nedd4 family interacting protein 2                                                                                           | -1.26 | 3.10E-05 |
| 212307.00 | Mapre2        | microtubule-associated protein, RP/EB family, member 2                                                                       | -1.26 | 8.80E-07 |
| 16529.00  | Kcnk5         | potassium channel, subfamily K, member 5                                                                                     | -1.26 | 1.10E-05 |
| 14915.00  | Guca2a        | guanylate cyclase activator 2a (guanylin)                                                                                    | -1.26 | 3.80E-06 |
| 14281.00  | Fos           | FBJ osteosarcoma oncogene                                                                                                    | -1.26 | 0.00018  |
| 68636.00  | Fahd1         | fumarylacetoacetate hydrolase domain containing 1                                                                            | -1.26 | 6.10E-05 |
| 212862.00 | ILMN_218521   | Mus musculus choline phosphotransferase 1 (Chpt1), mRNA.                                                                     | -1.26 | 4.20E-05 |
| 20276.00  | Scnn1a        | sodium channel, nonvoltage-gated 1 alpha                                                                                     | -1.27 | 8.50E-06 |
| 11758.00  | ILMN_210596   | Mus musculus peroxiredoxin 6 (Prdx6), mRNA.                                                                                  | -1.27 | 9.30E-06 |

|           |               |                                                                                              |       |          |
|-----------|---------------|----------------------------------------------------------------------------------------------|-------|----------|
| 23954.00  | Nek3          | NIMA (never in mitosis gene a)-related expressed kinase 3                                    | -1.27 | 1.50E-06 |
| 16432.00  | Itm2b         | integral membrane protein 2B                                                                 | -1.27 | 0.00054  |
| 27360.00  | Add3          | adducin 3 (gamma)                                                                            | -1.27 | 6.10E-05 |
| 67038.00  | 2010109I03Rik | RIKEN cDNA 2010109I03 gene                                                                   | -1.27 | 0.032    |
| 70113.00  | Odf3b         | outer dense fiber of sperm tails 3B                                                          | -1.27 | 0.00011  |
| 69864.00  | 1810065E05Rik | RIKEN cDNA 1810065E05 gene                                                                   | -1.27 | 0.0056   |
| 232078.00 | Thnsl2        | threonine synthase-like 2 (bacterial)                                                        | -1.28 | 6.50E-07 |
| 21415.00  | Tcf7l1        | transcription factor 7-like 1 (T-cell specific, HMG box)                                     | -1.28 | 0.0027   |
| 14102.00  | Fas           | Fas (TNF receptor superfamily member 6)                                                      | -1.28 | 0.00014  |
| 241041.00 | Gm4956        | predicted gene 4956                                                                          | -1.28 | 1.10E-05 |
| 70031.00  | Cmtm8         | CKLF-like MARVEL transmembrane domain containing 8                                           | -1.28 | 4.50E-06 |
| 381122.00 | Capn13        | calpain 13                                                                                   | -1.28 | 0.0045   |
| 12945.00  | Dmbt1         | deleted in malignant brain tumors 1                                                          | -1.29 | 0.0051   |
| 75568.00  | Capsl         | calcyphosine-like                                                                            | -1.29 | 1.50E-06 |
| 74340.00  | Ahcy12        | S-adenosylhomocysteine hydrolase-like 2                                                      | -1.29 | 0.00011  |
| 17965.00  | Nbl1          | neuroblastoma, suppression of tumorigenicity 1                                               | -1.3  | 3.50E-05 |
| 14132.00  | Fcgrt         | Fc receptor, IgG, alpha chain transporter                                                    | -1.3  | 1.00E-04 |
| 13821.00  | Epb4.111      | erythrocyte protein band 4.1-like 1                                                          | -1.3  | 4.90E-05 |
| 20515.00  | Slc20a1       | solute carrier family 20, member 1                                                           | -1.31 | 1.00E-04 |
| 18703.00  | Pigr          | polymeric immunoglobulin receptor                                                            | -1.31 | 0.00073  |
| 554292.00 | ILMN_238123   | Mus musculus UbiE-YGHL1 fusion protein (LOC554292), mRNA.                                    | -1.31 | 1.60E-05 |
| 209378.00 | Itih5         | inter-alpha (globulin) inhibitor H5                                                          | -1.31 | 1.20E-05 |
| 66270.00  | Fam134b       | family with sequence similarity 134, member B                                                | -1.31 | 0.00018  |
| 73102.00  | Slc22a23      | solute carrier family 22, member 23                                                          | -1.31 | 4.30E-07 |
| 23971.00  | Papss1        | 3'-phosphoadenosine 5'-phosphosulfate synthase 1                                             | -1.32 | 1.50E-06 |
| 99031.00  | Osbpl6        | oxysterol binding protein-like 6                                                             | -1.32 | 2.70E-06 |
| 384061.00 | ILMN_244553   | Mus musculus fibronectin type III domain containing 5 (Fn3c5), mRNA.                         | -1.32 | 1.60E-06 |
| 109901.00 | Cela1         | chymotrypsin-like elastase family, member 1                                                  | -1.32 | 0.0022   |
| 12864.00  | Cox6c         | cytochrome c oxidase, subunit VIc                                                            | -1.32 | 0.0055   |
| 76959.00  | Chmp5         | chromatin modifying protein 5                                                                | -1.32 | 6.50E-06 |
| 67171.00  | ILMN_257311   | Mus musculus transmembrane protein 77 (Tmem77), transcript variant 2, mRNA.                  | -1.33 | 4.70E-06 |
| 108682.00 | Gpt2          | glutamic pyruvate transaminase (alanine aminotransferase) 2                                  | -1.33 | 0.00044  |
| 338521.00 | Fa2h          | fatty acid 2-hydroxylase                                                                     | -1.33 | 5.00E-04 |
| 626708.00 | Defa26        | defensin, alpha, 26                                                                          | -1.33 | 0.00045  |
| 71900.00  | Tmem106b      | transmembrane protein 106B                                                                   | -1.33 | 5.50E-05 |
| 66938.00  | 1700029G01Rik | RIKEN cDNA 1700029G01 gene                                                                   | -1.33 | 4.60E-05 |
| 19775.00  | ILMN_195778   | Mus musculus xenotropic and polytropic retrovirus receptor 1 (Xpr1), mRNA.                   | -1.34 | 8.00E-06 |
| 17289.00  | Merk          | c-mer proto-oncogene tyrosine kinase                                                         | -1.34 | 0.00081  |
| 12457.00  | ILMN_208982   | Mus musculus CCR4 carbon catabolite repression 4-like (S. cerevisiae) (Ccrn4), mRNA.         | -1.34 | 0.00036  |
| 52466.00  | ILMN_213036   | Mus musculus solute carrier family 46, member 1 (Slc46a1), mRNA.                             | -1.35 | 0.0015   |
| 94249.00  | Slc24a3       | solute carrier family 24 (sodium/potassium/calcium exchanger), member 3                      | -1.35 | 1.50E-05 |
| 18569.00  | Pdcd4         | programmed cell death 4                                                                      | -1.35 | 0.00011  |
| 26384.00  | ILMN_226523   | Mus musculus glucosamine-6-phosphate deaminase 1 (Gnpda1), mRNA.                             | -1.35 | 8.30E-05 |
| 67731.00  | Fbxo32        | F-box protein 32                                                                             | -1.35 | 4.40E-05 |
| 13240.00  | Defa6         | defensin, alpha, 6                                                                           | -1.35 | 0.0042   |
| 244853.00 | Fam55d        | family with sequence similarity 55, member D                                                 | -1.35 | 0.0056   |
| 227929.00 | Cytip         | cytohesin 1 interacting protein                                                              | -1.35 | 8.90E-06 |
| 232078.00 | Thnsl2        | threonine synthase-like 2 (bacterial)                                                        | -1.36 | 1.50E-06 |
| 15567.00  | Slc6a4        | solute carrier family 6 (neurotransmitter transporter, serotonin), member 4                  | -1.36 | 2.70E-05 |
| 18175.00  | Nrap          | nebulin-related anchoring protein                                                            | -1.36 | 7.90E-05 |
| 77996.00  | D730039F16Rik | RIKEN cDNA D730039F16 gene                                                                   | -1.36 | 1.80E-05 |
| 13101.00  | Cyp2d10       | cytochrome P450, family 2, subfamily d, polypeptide 10                                       | -1.36 | 0.00045  |
| 13479.00  | Dpep1         | dipeptidase 1 (renal)                                                                        | -1.37 | 0.0035   |
| 12700.00  | Cish          | cytokine inducible SH2-containing protein                                                    | -1.37 | 1.80E-05 |
| 212862.00 | ILMN_218521   | Mus musculus choline phosphotransferase 1 (Chpt1), mRNA.                                     | -1.37 | 8.70E-05 |
| 58210.00  | Sectm1b       | secreted and transmembrane 1B                                                                | -1.38 | 0.0041   |
| 20196.00  | S100a13       | S100 calcium binding protein A13                                                             | -1.38 | 6.00E-05 |
| 243725.00 | Ppp1r9a       | protein phosphatase 1, regulatory (inhibitor) subunit 9A                                     | -1.38 | 4.50E-06 |
| 68009.00  | ILMN_196346   | Mus musculus defensin related cryptdin 20 (Defcr20), mRNA.                                   | -1.38 | 0.00065  |
| 66610.00  | Abi3          | ABI gene family, member 3                                                                    | -1.38 | 0.00047  |
| 381204.00 | Naalad11      | N-acetylated alpha-linked acidic dipeptidase-like 1                                          | -1.39 | 0.0076   |
| 109218.00 | Tmem139       | transmembrane protein 139                                                                    | -1.4  | 4.00E-05 |
| 50708.00  | Hist1h1c      | histone cluster 1, H1c                                                                       | -1.4  | 5.50E-05 |
| 108112.00 | ILMN_218862   | Mus musculus eukaryotic translation initiation factor 4E binding protein 3 (Eif4ebp3), mRNA. | -1.4  | 9.40E-05 |
| 56318.00  | ILMN_218213   | Mus musculus acid phosphatase, prostate (Acpp), transcript variant 1, mRNA.                  | -1.4  | 1.70E-06 |
| 76507.00  | Abp1          | amiloride binding protein 1 (amine oxidase, copper-containing)                               | -1.4  | 6.10E-05 |
| 234797.00 | 6430548M08Rik | RIKEN cDNA 6430548M08 gene                                                                   | -1.4  | 0.00084  |
| 20208.00  | Saa1          | serum amyloid A 1                                                                            | -1.41 | 0.0069   |

|              |               |                                                                                                                              |       |          |
|--------------|---------------|------------------------------------------------------------------------------------------------------------------------------|-------|----------|
| 76051.00     | ILMN_221992   | Mus musculus glucosidase, alpha; neutral C (Ganc), mRNA.                                                                     | -1.41 | 0.00022  |
| 11676.00     | Aldoc         | aldolase C, fructose-bisphosphate                                                                                            | -1.41 | 9.90E-07 |
| 207819.00    | ILMN_212940   | Mus musculus RIKEN cDNA 4930539E08 gene (4930539E08Rik), mRNA.                                                               | -1.41 | 0.00013  |
| 66222.00     | Serp1b1a      | serine (or cysteine) peptidase inhibitor, clade B, member 1a                                                                 | -1.42 | 4.20E-05 |
| 26395.00     | Map2k1        | mitogen-activated protein kinase kinase 1                                                                                    | -1.42 | 0.00086  |
| 70261.00     | 2010110P09Rik | RIKEN cDNA 2010110P09 gene                                                                                                   | -1.42 | 0.00049  |
| 102857.00    | Slc6a8        | solute carrier family 6 (neurotransmitter transporter, creatine), member 8                                                   | -1.43 | 0.00048  |
| 71207.00     | ILMN_212961   | Mus musculus nudix (nucleoside diphosphate linked moiety X)-type motif 4 (Nudt4), mRNA.                                      | -1.43 | 0.00018  |
| 13216.00     | ILMN_196581   | Mus musculus defensin, alpha 1 (Defa1), mRNA.                                                                                | -1.43 | 0.0012   |
| 240916.00    | Vsig8         | V-set and immunoglobulin domain containing 8                                                                                 | -1.44 | 1.40E-05 |
| 69123.00     | ILMN_210310   | Mus musculus RIKEN cDNA 1810022C23 gene (1810022C23Rik), mRNA.                                                               | -1.44 | 4.40E-06 |
| 15430.00     | Hoxd10        | homeobox D10                                                                                                                 | -1.46 | 0.0076   |
| 71436.00     | ILMN_210479   | Mus musculus fibronectin leucine rich transmembrane protein 3 (Flrt3), mRNA.                                                 | -1.47 | 6.50E-06 |
| 67198.00     | Spats2l       | spermatogenesis associated, serine-rich 2-like                                                                               | -1.48 | 9.60E-05 |
| 80890.00     | ILMN_187599   | Mus musculus tripartite motif protein 2 (Trim2), mRNA. XM_984114 XM_984144 XM_984172 XM_984200 XM_984238 XM_984275 XM_984313 | -1.49 | 0.00022  |
| 245049.00    | Myrip         | myosin VIIA and Rab interacting protein                                                                                      | -1.49 | 0.00029  |
| 67731.00     | Fbxo32        | F-box protein 32                                                                                                             | -1.49 | 5.80E-05 |
| 229933.00    | Clca5         | chloride channel calcium activated 5                                                                                         | -1.5  | 8.00E-06 |
| 76722.00     | Ckmt2         | creatine kinase, mitochondrial 2                                                                                             | -1.5  | 1.80E-06 |
| 16600.00     | Klf4          | Kruppel-like factor 4 (gut)                                                                                                  | -1.51 | 2.80E-05 |
| 545156.00    | Kalrn         | kalirin, RhoGEF kinase                                                                                                       | -1.51 | 0.00019  |
| 13239.00     | ILMN_196558   | Mus musculus defensin related cryptdin 5 (Defcr5), mRNA.                                                                     | -1.52 | 0.0036   |
| 101772.00    | Ano1          | anoctamin 1, calcium activated chloride channel                                                                              | -1.52 | 9.30E-06 |
| 53906.00     | Phgr1         | proline/histidine/glycine-rich 1                                                                                             | -1.52 | 3.40E-06 |
| 108079.00    | Prkaa2        | protein kinase, AMP-activated, alpha 2 catalytic subunit                                                                     | -1.53 | 0.0011   |
| 212862.00    | ILMN_218521   | Mus musculus choline phosphotransferase 1 (Chpt1), mRNA.                                                                     | -1.53 | 1.80E-05 |
| 234673.00    | Ces2e         | carboxylesterase 2E                                                                                                          | -1.53 | 0.0011   |
| 67731.00     | Fbxo32        | F-box protein 32                                                                                                             | -1.54 | 3.00E-04 |
| 13821.00     | Epb4.111      | erythrocyte protein band 4.1-like 1                                                                                          | -1.54 | 1.80E-06 |
| 19017.00     | Pparg1a       | peroxisome proliferative activated receptor, gamma, coactivator 1 alpha                                                      | -1.55 | 1.00E-04 |
| 13218.00     | Defa-rs1      | defensin, alpha, related sequence 1                                                                                          | -1.55 | 0.0076   |
| 56448.00     | ILMN_223233   | Mus musculus cytochrome P450, family 2, subfamily d, polypeptide 22 (Cyp2d22), mRNA.                                         | -1.55 | 0.0032   |
| 69574.00     | Cmbl          | carboxymethylenebutenolidase-like (Pseudomonas)                                                                              | -1.55 | 5.50E-05 |
| 433470.00    | AA467197      | expressed sequence AA467197                                                                                                  | -1.55 | 0.00059  |
| 227327.00    | B3gnt7        | UDP-GlcNAc:betaGal beta-1,3-N-acetylglucosaminyltransferase 7                                                                | -1.56 | 0.0025   |
| 11829.00     | Aqp4          | aquaporin 4                                                                                                                  | -1.56 | 0.00019  |
| 239606.00    | Slc2a13       | solute carrier family 2 (facilitated glucose transporter), member 13                                                         | -1.57 | 2.10E-05 |
| 102871.00    | D330045A20Rik | RIKEN cDNA D330045A20 gene                                                                                                   | -1.58 | 7.50E-05 |
| 231946.00    | D330028D13Rik | RIKEN cDNA D330028D13 gene                                                                                                   | -1.58 | 0.00029  |
| 23844.00     | Clca3         | chloride channel calcium activated 3                                                                                         | -1.58 | 0.0081   |
| 319848.00    | Slc17a4       | solute carrier family 17 (sodium phosphate), member 4                                                                        | -1.59 | 4.60E-05 |
| 14199.00     | Fhl1          | four and a half LIM domains 1                                                                                                | -1.59 | 0.0087   |
| 20510.00     | Slc1a1        | solute carrier family 1 (neuronal/epithelial high affinity glutamate transporter, system Xag), member 1                      | -1.6  | 3.70E-06 |
| 170677.00    | Cdhr1         | cadherin-related family member 1                                                                                             | -1.6  | 1.70E-06 |
| 68009.00     | ILMN_196346   | Mus musculus defensin related cryptdin 20 (Defcr20), mRNA.                                                                   | -1.6  | 0.00056  |
| 384061.00    | Fndc5         | fibronectin type III domain containing 5                                                                                     | -1.61 | 3.50E-07 |
| 230576.00    | Ttc22         | tetratricopeptide repeat domain 22                                                                                           | -1.62 | 5.80E-06 |
| 20541.00     | Slc8a1        | solute carrier family 8 (sodium/calcium exchanger), member 1                                                                 | -1.63 | 0.00094  |
| 207259.00    | Zbtb7c        | zinc finger and BTB domain containing 7C                                                                                     | -1.64 | 1.50E-05 |
| 13240.00     | Defa6         | defensin, alpha, 6                                                                                                           | -1.64 | 0.0011   |
| 16600.00     | Klf4          | Kruppel-like factor 4 (gut)                                                                                                  | -1.65 | 4.00E-05 |
| 433904.00    | Ociad2        | OClA domain containing 2                                                                                                     | -1.66 | 4.40E-05 |
| 56209.00     | Gde1          | glycerophosphodiester phosphodiesterase 1                                                                                    | -1.66 | 8.90E-06 |
| 14199.00     | Fhl1          | four and a half LIM domains 1                                                                                                | -1.67 | 0.003    |
| 226781.00    | Slc30a10      | solute carrier family 30, member 10                                                                                          | -1.68 | 0.0044   |
| 76722.00     | Ckmt2         | creatine kinase, mitochondrial 2                                                                                             | -1.68 | 1.10E-06 |
| 258458.00    | Olfrl165      | olfactory receptor 165                                                                                                       | -1.7  | 6.00E-06 |
| 16600.00     | Klf4          | Kruppel-like factor 4 (gut)                                                                                                  | -1.7  | 9.20E-05 |
| 56226.00     | Espn          | espin                                                                                                                        | -1.7  | 2.20E-05 |
| 20342.00     | ILMN_227312   | Mus musculus selenium binding protein 2 (Selenbp2), mRNA.                                                                    | -1.71 | 0.00044  |
| 67182.00     | Pdzk1ip1      | PDZK1 interacting protein 1                                                                                                  | -1.71 | 3.80E-05 |
| 100044204.00 | ILMN_221943   | PREDICTED: Mus musculus hypothetical protein LOC100044204 (LOC100044204), mRNA.                                              | -1.71 | 0.00011  |
| 56209.00     | Gde1          | glycerophosphodiester phosphodiesterase 1                                                                                    | -1.71 | 1.70E-06 |
| 76787.00     | Ppfia3        | protein tyrosine phosphatase, receptor type, f polypeptide (PTPRF), interacting protein (liprin), alpha 3                    | -1.74 | 3.80E-05 |
| 56209.00     | Gde1          | glycerophosphodiester phosphodiesterase 1                                                                                    | -1.74 | 4.70E-06 |
| 99663.00     | Clca6         | chloride channel calcium activated 6                                                                                         | -1.74 | 0.03     |
| 192970.00    | Dhrs11        | dehydrogenase/reductase (SDR family) member 11                                                                               | -1.74 | 5.70E-06 |
| 18858.00     | Pmp22         | peripheral myelin protein 22                                                                                                 | -1.77 | 0.00094  |

|              |             |                                                                                                                  |       |          |
|--------------|-------------|------------------------------------------------------------------------------------------------------------------|-------|----------|
| 74134.00     | Cyp2s1      | cytochrome P450, family 2, subfamily s, polypeptide 1                                                            | -1.77 | 5.00E-06 |
| 20510.00     | Slc1a1      | solute carrier family 1 (neuronal/epithelial high affinity glutamate transporter, system Xag), member 1          | -1.78 | 6.70E-07 |
| 20910.00     | Stxbp1      | syntaxin binding protein 1                                                                                       | -1.79 | 6.50E-06 |
| 66438.00     | Hamp2       | hepcidin antimicrobial peptide 2                                                                                 | -1.79 | 0.00013  |
| 71687.00     | Tmem25      | transmembrane protein 25                                                                                         | -1.8  | 2.50E-06 |
| 20755.00     | ILMN_215269 | Mus musculus small proline-rich protein 2A (Sprr2a), mRNA.                                                       | -1.8  | 7.60E-06 |
| 66090.00     | Ypel3       | yippee-like 3 (Drosophila)                                                                                       | -1.85 | 2.00E-06 |
| 68416.00     | Sycn        | syncollin                                                                                                        | -1.85 | 0.016    |
| 100041194.00 | Ahnak2      | AHNAK nucleoprotein 2                                                                                            | -1.85 | 2.90E-07 |
| 268860.00    | Abat        | 4-aminobutyrate aminotransferase                                                                                 | -1.85 | 4.40E-07 |
| 15446.00     | Hpgd        | hydroxyprostaglandin dehydrogenase 15 (NAD)                                                                      | -1.86 | 2.60E-05 |
| 12865.00     | Cox7a1      | cytochrome c oxidase, subunit VIIa 1                                                                             | -1.87 | 4.50E-06 |
| 67307.00     | Pbid2       | phenazine biosynthesis-like protein domain containing 2                                                          | -1.87 | 3.70E-07 |
| 13034.00     | ILMN_253611 | Mus musculus cathepsin E (Ctse), mRNA.                                                                           | -1.89 | 0.00017  |
| 20259.00     | Scin        | scinderin                                                                                                        | -1.9  | 4.90E-05 |
| 16429.00     | Itln1       | intelectin 1 (galactofuranose binding)                                                                           | -1.9  | 2.00E-04 |
| 12231.00     | Btn1a1      | butyrophilin, subfamily 1, member A1                                                                             | -1.91 | 4.80E-07 |
| 230163.00    | Aldob       | aldolase B, fructose-bisphosphate                                                                                | -1.91 | 0.00055  |
| 77889.00     | Lbh         | limb-bud and heart                                                                                               | -1.93 | 4.90E-05 |
| 20500.00     | Slc13a2     | solute carrier family 13 (sodium-dependent dicarboxylate transporter), member 2                                  | -1.95 | 0.00062  |
| 26456.00     | Sema4g      | sema domain, immunoglobulin domain (Ig), transmembrane domain (TM) and short cytoplasmic domain, (semaphorin) 4G | -1.96 | 4.20E-06 |
| 268860.00    | Abat        | 4-aminobutyrate aminotransferase                                                                                 | -1.96 | 1.60E-05 |
| 72948.00     | Tppp        | tubulin polymerization promoting protein                                                                         | -1.98 | 6.50E-06 |
| 56226.00     | Espn        | espin                                                                                                            | -1.98 | 2.30E-05 |
| 20363.00     | Sepp1       | selenoprotein P, plasma, 1                                                                                       | -2.02 | 0.0034   |
| 100044291.00 | ILMN_221210 | PREDICTED: Mus musculus hypothetical protein LOC100044291 (LOC100044291), mRNA.                                  | -2.02 | 9.40E-05 |
| 20531.00     | Slc34a2     | solute carrier family 34 (sodium phosphate), member 2                                                            | -2.05 | 0.0019   |
| 16173.00     | Il18        | interleukin 18                                                                                                   | -2.05 | 6.70E-05 |
| 23959.00     | Nt5e        | 5' nucleotidase, ecto                                                                                            | -2.06 | 0.0012   |
| 77889.00     | Lbh         | limb-bud and heart                                                                                               | -2.08 | 0.00014  |
| 268480.00    | Rapgef1     | Rap guanine nucleotide exchange factor (GEF)-like 1                                                              | -2.1  | 3.10E-07 |
| 23959.00     | Nt5e        | 5' nucleotidase, ecto                                                                                            | -2.11 | 2.10E-05 |
| 13370.00     | Dio1        | deiodinase, iodothyronine, type I                                                                                | -2.11 | 3.10E-06 |
| 57319.00     | Smpd3a      | sphingomyelin phosphodiesterase, acid-like 3A                                                                    | -2.12 | 8.50E-06 |
| 493583.00    | ILMN_256959 | Mus musculus intelectin b (Itlnb), mRNA.                                                                         | -2.2  | 4.00E-05 |
| 13370.00     | Dio1        | deiodinase, iodothyronine, type I                                                                                | -2.23 | 1.70E-06 |
| 12579.00     | Cdkn2b      | cyclin-dependent kinase inhibitor 2B (p15, inhibits CDK4)                                                        | -2.26 | 1.70E-06 |
| 20363.00     | Sepp1       | selenoprotein P, plasma, 1                                                                                       | -2.3  | 0.00079  |
| 268480.00    | Rapgef1     | Rap guanine nucleotide exchange factor (GEF)-like 1                                                              | -2.33 | 6.10E-06 |
| 109791.00    | Clps        | colipase, pancreatic                                                                                             | -2.37 | 2.50E-05 |
| 17287.00     | Mep1a       | meprin 1 alpha                                                                                                   | -2.41 | 0.00036  |
| 101488.00    | Slco2b1     | solute carrier organic anion transporter family, member 2b1                                                      | -2.52 | 7.30E-05 |
| 109791.00    | Clps        | colipase, pancreatic                                                                                             | -2.57 | 4.60E-05 |
| 21818.00     | Tgm3        | transglutaminase 3, E polypeptide                                                                                | -2.58 | 4.20E-05 |
| 69083.00     | Sult1c2     | sulfotransferase family, cytosolic, 1C, member 2                                                                 | -2.58 | 9.90E-08 |
| 67971.00     | Tppp3       | tubulin polymerization-promoting protein family member 3                                                         | -2.59 | 4.80E-07 |
| 53315.00     | Sult1d1     | sulfotransferase family 1D, member 1                                                                             | -2.63 | 1.60E-06 |
| 56185.00     | Hao2        | hydroxyacid oxidase 2                                                                                            | -2.67 | 7.10E-06 |
| 20887.00     | Sult1a1     | sulfotransferase family 1A, phenol-preferring, member 1                                                          | -2.7  | 2.00E-05 |
| 393082.00    | ILMN_243966 | Mus musculus methyltransferase like 7A2 (Mettl7a2), mRNA.                                                        | -2.73 | 1.30E-09 |
| 545288.00    | Cyp2c67     | cytochrome P450, family 2, subfamily c, polypeptide 67                                                           | -2.77 | 4.40E-07 |
| 13615.00     | Edn2        | endothelin 2                                                                                                     | -2.98 | 2.80E-05 |
| 22635.00     | Zan         | zonadhesin                                                                                                       | -2.99 | 3.60E-08 |
| 233038.00    | Nccrp1      | non-specific cytotoxic cell receptor protein 1 homolog (zebrafish)                                               | -3.11 | 2.10E-06 |
| 216225.00    | Slc5a8      | solute carrier family 5 (iodide transporter), member 8                                                           | -3.13 | 1.60E-06 |
| 219033.00    | Ang4        | angiogenin, ribonuclease A family, member 4                                                                      | -3.25 | 6.70E-05 |
| 13107.00     | Cyp2f2      | cytochrome P450, family 2, subfamily f, polypeptide 2                                                            | -3.49 | 3.60E-08 |
| 18947.00     | Pnliprp2    | pancreatic lipase-related protein 2                                                                              | -3.52 | 1.10E-05 |
| 232889.00    | Pla2g4c     | phospholipase A2, group IVC (cytosolic, calcium-independent)                                                     | -3.72 | 3.00E-04 |
| 331063.00    | ILMN_196357 | Mus musculus expressed sequence AI987692 (AI987692), mRNA.                                                       | -4.02 | 4.50E-06 |
| 18947.00     | Pnliprp2    | pancreatic lipase-related protein 2                                                                              | -4.18 | 2.40E-06 |
| 270328.00    | ILMN_196360 | Mus musculus gasdermin C3 (Gsdmc3), mRNA.                                                                        | -4.29 | 1.90E-07 |
| 331063.00    | Gsdmc2      | gasdermin C2                                                                                                     | -4.4  | 3.50E-07 |
| 100045250.00 | ILMN_196357 | PREDICTED: Mus musculus hypothetical protein LOC100045250 (LOC100045250), misc RNA.                              | -4.5  | 3.70E-06 |

## Supplementary Table S3

Ct values of genes analyzed by qRT-PCR in HEK293 cells treated with DMSO (control) or BIO; obtained Ct values were normalized to  $\beta$ -actin gene expression; SD, standard deviation.

| gene name | DMSO      |      | BIO       |      |
|-----------|-----------|------|-----------|------|
|           | Ct values | SD   | Ct values | SD   |
| MSX1      | 28.47     | 0.15 | 27.96     | 0.08 |
| MSX2      | 25.74     | 0.04 | 25.09     | 0.11 |
| NKD1      | 26.23     | 0.18 | 22.42     | 0.15 |
| TROY      | 26.21     | 0.05 | 24.43     | 0.11 |
| UBB       | 18.62     | 0.06 | 18.74     | 0.01 |

### Supplementary Table S3

Ct values of genes analyzed by qRT-PCR in STF cells with the intact (control) or truncated *APC* gene in exon 10 or exon 15; obtained Ct values were normalized to  $\beta$ -actin gene expression; SD, standard deviation.

| gene name | control   |      | exon 10   |      | exon 15   |      |
|-----------|-----------|------|-----------|------|-----------|------|
|           | Ct values | SD   | Ct values | SD   | Ct values | SD   |
| AXIN2     | 31.17     | 0.40 | 29.54     | 0.01 | 28.75     | 0.01 |
| MSX1      | 28.28     | 0.43 | 27.04     | 0.02 | 25.58     | 0.11 |
| MSX2      | 27.20     | 0.16 | 25.78     | 0.01 | 24.14     | 0.03 |
| NKD1      | 28.36     | 0.06 | 24.14     | 0.13 | 25.22     | 0.07 |
| UBB       | 19.40     | 0.04 | 18.97     | 0.01 | 19.80     | 0.02 |

### Supplementary Table S3

Ct values of genes analyzed by qRT-PCR in SW480 cells upon transfection with non-silencing (nsc) siRNAs or siRNAs targeting *β-catenin* mRNA; obtained Ct values were normalized to *β-actin* gene expression; SD, standard deviation.

| gene name | nsc siRNAs |      | β-catenin siRNAs |      |
|-----------|------------|------|------------------|------|
|           | Ct values  | SD   | Ct values        | SD   |
| β-CATENIN | 21.17      | 0.08 | 26.48            | 0.30 |
| MSX1      | 26.10      | 0.01 | 28.54            | 0.42 |
| MSX2      | 25.22      | 0.24 | 27.65            | 0.17 |
| NKD1      | 22.93      | 0.12 | 27.39            | 0.16 |
| TROY      | 26.72      | 0.00 | 29.23            | 0.08 |
| UBB       | 18.86      | 0.16 | 19.56            | 0.04 |

### Supplementary Table S3

Ct values of genes analyzed by qRT-PCR in SW620 cells upon transfection with non-silencing (nsc) siRNAs or siRNAs targeting *β-catenin* mRNA; obtained Ct values were normalized to *β-actin* gene expression; SD, standard deviation.

| gene name | nsc siRNAs |      | β-catenin siRNAs |      |
|-----------|------------|------|------------------|------|
|           | Ct values  | SD   | Ct values        | SD   |
| β-CATENIN | 20.59      | 1.15 | 23.66            | 0.10 |
| MSX1      | 20.64      | 0.04 | 24.39            | 0.06 |
| MSX2      | 24.28      | 0.06 | 25.99            | 0.11 |
| NKD1      | 20.90      | 0.16 | 25.12            | 0.01 |
| TROY      | 27.24      | 0.25 | 29.14            | 0.42 |
| UBB       | 17.47      | 0.39 | 17.81            | 0.25 |



### Supplementary Table S3

Ct values of genes analyzed by qRT-PCR in STF cells with the *APC* gene truncated in exon 10 upon transfection with non-silencing (nsc) siRNAs or siRNAs targeting *β-catenin* mRNA; obtained Ct values were normalized to *β-actin* gene expression; SD, standard deviation.

| gene name | nsc siRNAs |      | β-catenin siRNAs |      |
|-----------|------------|------|------------------|------|
|           | Ct values  | SD   | Ct values        | SD   |
| AXIN2     | 23.68      | 0.02 | 25.10            | 0.02 |
| β-CATENIN | 22.48      | 0.08 | 25.75            | 0.11 |
| MSX1      | 28.99      | 0.14 | 29.83            | 0.10 |
| MSX2      | 26.31      | 0.09 | 27.15            | 0.09 |
| UBB       | 19.56      | 0.05 | 19.38            | 0.03 |

## Supplementary Table S4

Differentially expressed genes (with  $|\log_2FC| \geq 1$ ;  $p \leq 0.05$ ) in the small intestinal *Msx1* wt and *Msx1*-deficient hyperplastic epithelium

| ENTREZ    | SYMBOL   | GENENAME                                                                               | logFC | p-value  |
|-----------|----------|----------------------------------------------------------------------------------------|-------|----------|
| 170942    | Erdrl    | erythroid differentiation regulator 1                                                  | 3.52  | 2.00E-04 |
| 57742     | Abhd1    | abhydrolase domain containing 1                                                        | 2.93  | 4.10E-05 |
| 57742     | Abhd1    | abhydrolase domain containing 1                                                        | 2.84  | 5.60E-05 |
| 434794    |          | Mus musculus X-linked lymphocyte-regulated 4A (Xlr4a), mRNA                            | 2.81  | 0.0083   |
| 11746     | Anxa4    | annexin A4                                                                             | 2.77  | 0.066    |
| 57742     | Abhd1    | abhydrolase domain containing 1                                                        | 2.26  | 0.00068  |
| 68337     | Crip2    | cysteine rich protein 2                                                                | 2.19  | 6.90E-05 |
| 223227    | Sox21    | SRY (sex determining region Y)-box 21                                                  | 2.1   | 0.0098   |
| 20249     | Scd1     | stearoyl-Coenzyme A desaturase 1                                                       | 2.03  | 0.001    |
| 15122     |          | Mus musculus hemoglobin alpha, adult chain 1 (Hba-a1), mRNA.                           | 1.92  | 0.19     |
| 19652     | Rbm3     | RNA binding motif protein 3                                                            | 1.88  | 0.0014   |
| 14733     | Gpc1     | glypican 1                                                                             | 1.88  | 0.018    |
| 406217    | Bex4     | brain expressed X-linked 4                                                             | 1.79  | 0.014    |
| 14472     | Gbx2     | gastrulation brain homeobox 2                                                          | 1.78  | 0.019    |
| 223227    | Sox21    | SRY (sex determining region Y)-box 21                                                  | 1.77  | 0.014    |
| 20350     | Sema3f   | sema domain, immunoglobulin domain (Ig), short basic domain, secreted, (semaphorin) 3F | 1.67  | 0.014    |
| 192212    | Prom2    | prominin 2                                                                             | 1.65  | 0.048    |
| 69195     | Tmem121  | transmembrane protein 121                                                              | 1.64  | 0.14     |
| 64293     | Stk32b   | serine/threonine kinase 32B                                                            | 1.64  | 0.00092  |
| 23962     | Oas12    | 2'-5' oligoadenylate synthetase-like 2                                                 | 1.57  | 0.0045   |
| 16145     | Igtp     | interferon gamma induced GTPase                                                        | 1.57  | 0.1      |
| 329064    | Pkd21l   | polycystic kidney disease 2-like 1                                                     | 1.52  | 0.0026   |
| 15360     | Hmgcs2   | 3-hydroxy-3-methylglutaryl-Coenzyme A synthase 2                                       | 1.52  | 0.006    |
| 14469     | Gbp2     | guanylate binding protein 2                                                            | 1.5   | 0.22     |
| 21380     | Tbx1     | T-box 1                                                                                | 1.49  | 0.0081   |
| 20350     | Sema3f   | sema domain, immunoglobulin domain (Ig), short basic domain, secreted, (semaphorin) 3F | 1.42  | 0.013    |
| 100038882 | Isg15    | ISG15 ubiquitin-like modifier                                                          | 1.41  | 0.067    |
| 17329     | Cxcl9    | chemokine (C-X-C motif) ligand 9                                                       | 1.41  | 0.12     |
| 68713     | Ifitm1   | interferon induced transmembrane protein 1                                             | 1.34  | 0.11     |
| 76943     | Psap1    | prosaposin-like 1                                                                      | 1.32  | 0.0097   |
| 13644     | Efs      | embryonal Fyn-associated substrate                                                     | 1.32  | 0.02     |
| 72434     | Lypd3    | Ly6/Plaur domain containing 3                                                          | 1.31  | 0.011    |
| 67855     | Asprv1   | aspartic peptidase, retroviral-like 1                                                  | 1.31  | 0.047    |
| 22269     | Upk2     | uroplakin 2                                                                            | 1.3   | 0.0084   |
| 24110     | Usp18    | ubiquitin specific peptidase 18                                                        | 1.29  | 0.018    |
| 52250     | Reep1    | receptor accessory protein 1                                                           | 1.29  | 0.015    |
| 11749     | Anxa6    | annexin A6                                                                             | 1.28  | 0.049    |
| 226245    | Plekhs1  | pleckstrin homology domain containing, family S member 1                               | 1.28  | 0.028    |
| 20671     | Sox17    | SRY (sex determining region Y)-box 17                                                  | 1.27  | 0.05     |
| 108052    | Slc14a1  | solute carrier family 14 (urea transporter), member 1                                  | 1.27  | 0.002    |
| 11567     | Avil     | advillin                                                                               | 1.27  | 0.14     |
| 67967     | Pold3    | polymerase (DNA-directed), delta 3, accessory subunit                                  | 1.26  | 0.0033   |
| 58185     | Rsad2    | radical S-adenosyl methionine domain containing 2                                      | 1.25  | 0.024    |
| 17242     | Mdk      | midkine                                                                                | 1.25  | 4.10E-05 |
| 20129     | Rptn     | repetin                                                                                | 1.24  | 0.0021   |
| 20671     | Sox17    | SRY (sex determining region Y)-box 17                                                  | 1.23  | 0.0072   |
| 67951     | Tubb6    | tubulin, beta 6 class V                                                                | 1.21  | 0.04     |
| 20910     | Stxbp1   | syntaxin binding protein 1                                                             | 1.21  | 0.0026   |
| 268396    | Sh3pxd2b | SH3 and PX domains 2B                                                                  | 1.2   | 0.0029   |
| 13034     | Ctse     | cathepsin E                                                                            | 1.2   | 0.11     |
| 22153     | Tubb4a   | tubulin, beta 4A class IVA                                                             | 1.19  | 0.053    |
| 15959     | Ifit3    | interferon-induced protein with tetratricopeptide repeats 3                            | 1.19  | 0.041    |
| 231050    | Galnt11  | UDP-N-acetyl-alpha-D-galactosamine:polypeptide N-acetylgalactosaminyltransferase 11    | 1.19  | 0.036    |
| 69065     | Chac1    | ChaC, cation transport regulator 1                                                     | 1.18  | 0.045    |
| 108052    | Slc14a1  | solute carrier family 14 (urea transporter), member 1                                  | 1.17  | 0.012    |
| 654824    | Ankrd37  | ankyrin repeat domain 37                                                               | 1.17  | 0.0047   |
| 225027    | Srsf7    | serine/arginine-rich splicing factor 7                                                 | 1.16  | 0.039    |
| 240334    | Pcyox11  | prenylcysteine oxidase 1 like                                                          | 1.16  | 0.001    |
| 246728    | Oas2     | 2'-5' oligoadenylate synthetase 2                                                      | 1.15  | 0.12     |
| 27261     | Dok3     | docking protein 3                                                                      | 1.15  | 0.0033   |
| 74007     | Btd11    | BTB (POZ) domain containing 11                                                         | 1.15  | 0.042    |
| 11752     | Anxa8    | annexin A8                                                                             | 1.12  | 0.1      |
| 22228     | Ucp2     | uncoupling protein 2 (mitochondrial, proton carrier)                                   | 1.1   | 9.60E-05 |
| 226123    | Morn4    | MORN repeat containing 4                                                               | 1.1   | 0.0011   |
| 406217    |          | Mus musculus brain expressed gene 4 (Bex4), mRNA.                                      | 1.09  | 0.027    |
| 244886    | Tmem266  | transmembrane protein 266                                                              | 1.09  | 0.0042   |
| 240675    | Vwa2     | von Willebrand factor A domain containing 2                                            | 1.08  | 0.0048   |
| 58194     | Sh3kbp1  | SH3-domain kinase binding protein 1                                                    | 1.08  | 0.058    |
| 331063    | Gsdmc2   | gasdermin C2                                                                           | 1.08  | 0.0099   |
| 18812     | Prl2c3   | prolactin family 2, subfamily c, member 3                                              | 1.07  | 0.0057   |

|        |          |                                                                                                                      |       |         |
|--------|----------|----------------------------------------------------------------------------------------------------------------------|-------|---------|
| 27395  | Mrp115   | mitochondrial ribosomal protein L15                                                                                  | 1.07  | 0.0046  |
| 24110  | Usp18    | ubiquitin specific peptidase 18                                                                                      | 1.07  | 0.0093  |
| 15958  | Ifit2    | interferon-induced protein with tetratricopeptide repeats 2                                                          | 1.07  | 0.02    |
| 54396  | Irgm2    | immunity-related GTPase family M member 2                                                                            | 1.06  | 0.17    |
| 15505  | Hsph1    | heat shock 105kDa/110kDa protein 1                                                                                   | 1.06  | 0.003   |
| 24110  | Usp18    | ubiquitin specific peptidase 18                                                                                      | 1.05  | 0.023   |
| 331063 | Gsdmc2   | gasdermin C2                                                                                                         | 1.05  | 0.021   |
| 54352  | Irx5     | Iroquois related homeobox 5 (Drosophila)                                                                             | 1.03  | 0.011   |
| 11639  | Ak4      | adenylate kinase 4                                                                                                   | 1.02  | 0.061   |
| 74777  | Sepr1    | selenoprotein N, 1                                                                                                   | 1.01  | 0.02    |
| 213171 | Prss27   | protease, serine 27                                                                                                  | 1.01  | 0.06    |
| 21939  | Cd40     | CD40 antigen                                                                                                         | 1.01  | 0.002   |
| 21858  | Timp2    | tissue inhibitor of metalloproteinase 2                                                                              | 1     | 0.016   |
| 22379  | Fmn13    | formin-like 3                                                                                                        | 1     | 0.18    |
| 11684  | Alox12   | arachidonate 12-lipoxygenase                                                                                         | 1     | 0.0048  |
| 381524 | AI427809 | expressed sequence AI427809                                                                                          | 1     | 0.0057  |
| 67800  | Dgat2    | diacylglycerol O-acyltransferase 2                                                                                   | -1    | 0.0065  |
| 21685  | Tef      | thyrotroph embryonic factor                                                                                          | -1.01 | 0.012   |
| 217166 | Nr1d1    | nuclear receptor subfamily 1, group D, member 1                                                                      | -1.01 | 0.034   |
| 56615  | Mgst1    | microsomal glutathione S-transferase 1                                                                               | -1.01 | 0.021   |
| 216136 | Ilvbl    | ilvB (bacterial acetolactate synthase)-like                                                                          | -1.01 | 0.0079  |
| 66412  | Ardc4    | arrestin domain containing 4                                                                                         | -1.02 | 0.0092  |
| 74525  | Fam234b  | family with sequence similarity 234, member B                                                                        | -1.02 | 0.0084  |
| 330962 | Slc51b   | solute carrier family 51, beta subunit                                                                               | -1.03 | 0.17    |
| 14345  | Fut4     | fucosyltransferase 4                                                                                                 | -1.03 | 0.0057  |
| 74519  | Cyp2j9   | cytochrome P450, family 2, subfamily j, polypeptide 9                                                                | -1.03 | 0.18    |
| 11459  | Acta1    | actin, alpha 1, skeletal muscle                                                                                      | -1.03 | 0.06    |
| 50934  | Slc7a8   | solute carrier family 7 (cationic amino acid transporter, y+ system), member 8                                       | -1.04 | 0.022   |
| 71584  | Gdpd2    | glycerophosphodiester phosphodiesterase domain containing 2                                                          | -1.04 | 0.0091  |
| 226040 | Tmem252  | transmembrane protein 252                                                                                            | -1.04 | 0.00038 |
| 101488 | Slco2b1  | solute carrier organic anion transporter family, member 2b1                                                          | -1.05 | 0.015   |
| 74338  | Slc6a19  | solute carrier family 6 (neurotransmitter transporter), member 19                                                    | -1.05 | 0.11    |
| 18150  |          | Mus musculus nucleoplamin 3 (Npm3), mRNA.                                                                            | -1.05 | 0.043   |
| 18096  | Nkx6-1   | NK6 homeobox 1                                                                                                       | -1.05 | 0.04    |
| 13088  | Cyp2b10  | cytochrome P450, family 2, subfamily b, polypeptide 10                                                               | -1.05 | 0.11    |
| 100434 | Slc44a1  | solute carrier family 44, member 1                                                                                   | -1.06 | 0.0037  |
| 19341  | Rab4a    | RAB4A, member RAS oncogene family                                                                                    | -1.06 | 0.0069  |
| 18036  | Nfkib1   | nuclear factor of kappa light polypeptide gene enhancer in B cells inhibitor, beta                                   | -1.06 | 0.004   |
| 433278 | Khdc1c   | KH domain containing 1C                                                                                              | -1.06 | 0.00052 |
| 14219  | Ctgf     | connective tissue growth factor                                                                                      | -1.06 | 0.00012 |
| 68396  | Nat8     | N-acetyltransferase 8 (GCN5-related)                                                                                 | -1.06 | 0.16    |
| 223631 | BC025446 | cDNA sequence BC025446                                                                                               | -1.06 | 0.056   |
| 66273  | Aamd1    | adipogenesis associated Mth938 domain containing                                                                     | -1.06 | 0.0027  |
| 225997 | Trpm6    | transient receptor potential cation channel, subfamily M, member 6                                                   | -1.07 | 0.00025 |
| 242864 | Napepld  | N-acyl phosphatidylethanolamine phospholipase D                                                                      | -1.07 | 0.038   |
| 68943  | Pink1    | PTEN induced putative kinase 1                                                                                       | -1.07 | 0.0039  |
| 15186  | Hdc      | histidine decarboxylase                                                                                              | -1.07 | 0.012   |
| 97998  | Deptor   | DEP domain containing MTOR-interacting protein                                                                       | -1.07 | 0.018   |
| 11829  | Aqp4     | aquaporin 4                                                                                                          | -1.07 | 0.0059  |
| 23849  | Klf6     | Kruppel-like factor 6                                                                                                | -1.08 | 0.00018 |
| 13120  | Cyp4b1   | cytochrome P450, family 4, subfamily b, polypeptide 1                                                                | -1.08 | 0.11    |
| 381903 | Alg8     | asparagine-linked glycosylation 8 (alpha-1,3-glucoyltransferase)                                                     | -1.08 | 0.017   |
| 230163 | Aldob    | aldolase B, fructose-bisphosphate                                                                                    | -1.08 | 0.052   |
| 11539  | Adora1   | adenosine A1 receptor                                                                                                | -1.08 | 0.0032  |
| 217166 | Nr1d1    | nuclear receptor subfamily 1, group D, member 1                                                                      | -1.09 | 0.061   |
| 72303  | Cyp2c65  | cytochrome P450, family 2, subfamily c, polypeptide 65                                                               | -1.09 | 0.11    |
| 102294 | Cyp4v3   | cytochrome P450, family 4, subfamily v, polypeptide 3                                                                | -1.1  | 0.14    |
| 22064  |          | Mus musculus transient receptor potential cation channel, subfamily C, member 2 (Trpc2), transcript variant 1, mRNA. | -1.11 | 0.019   |
| 208659 | Fam20a   | family with sequence similarity 20, member A                                                                         | -1.11 | 0.0055  |
| 71972  | Dnmbp    | dynamitin binding protein                                                                                            | -1.11 | 0.034   |
| 104681 | Slc16a6  | solute carrier family 16 (monocarboxylic acid transporters), member 6                                                | -1.14 | 0.0023  |
| 13106  | Cyp2e1   | cytochrome P450, family 2, subfamily e, polypeptide 1                                                                | -1.14 | 0.22    |
| 19329  | Rab17    | RAB17, member RAS oncogene family                                                                                    | -1.15 | 0.0031  |
| 104009 | Qsox1    | quiescins Q6 sulfhydryl oxidase 1                                                                                    | -1.15 | 0.0048  |
| 17988  | Ndr1     | N-myc downstream regulated gene 1                                                                                    | -1.15 | 0.061   |
| 18604  | Pdk2     | pyruvate dehydrogenase kinase, isoenzyme 2                                                                           | -1.16 | 0.063   |
| 57257  | Vav3     | vav 3 oncogene                                                                                                       | -1.17 | 0.017   |
| 104158 | Ces1d    | carboxylesterase 1D                                                                                                  | -1.17 | 0.3     |
| 14164  | Fgf1     | fibroblast growth factor 1                                                                                           | -1.18 | 0.035   |
| 225913 | Tkfc     | triokinase, FMN cyclase                                                                                              | -1.19 | 0.0058  |
| 230163 | Aldob    | aldolase B, fructose-bisphosphate                                                                                    | -1.19 | 0.028   |
| 72514  | Fgfbp3   | fibroblast growth factor binding protein 3                                                                           | -1.2  | 0.0013  |
| 67470  | Abcg8    | ATP-binding cassette, sub-family G (WHITE), member 8                                                                 | -1.2  | 0.0086  |
| 20526  | Slc2a2   | solute carrier family 2 (facilitated glucose transporter), member 2                                                  | -1.21 | 0.037   |
| 68404  | Nrn1     | neuritin 1                                                                                                           | -1.21 | 0.0021  |
| 109731 | Maob     | monoamine oxidase B                                                                                                  | -1.21 | 0.065   |

|        |          |                                                                                       |       |          |
|--------|----------|---------------------------------------------------------------------------------------|-------|----------|
| 71584  | Gdpd2    | glycerophosphodiester phosphodiesterase domain containing 2                           | -1.22 | 0.019    |
| 56643  | Slc15a1  | solute carrier family 15 (oligopeptide transporter), member 1                         | -1.23 | 0.076    |
| 15199  | Hebp1    | heme binding protein 1                                                                | -1.23 | 0.052    |
| 114664 | Hsd17b11 | hydroxysteroid (17-beta) dehydrogenase 11                                             | -1.24 | 0.02     |
| 14456  | Gas6     | growth arrest specific 6                                                              | -1.24 | 0.014    |
| 11826  | Aqp1     | aquaporin 1                                                                           | -1.24 | 0.036    |
| 117591 | Slc2a9   | solute carrier family 2 (facilitated glucose transporter), member 9                   | -1.25 | 0.0094   |
| 328059 | Slc7a15  | solute carrier family 7 (cationic amino acid transporter, y+ system), member 15       | -1.26 | 0.12     |
| 72373  | Psca     | prostate stem cell antigen                                                            | -1.26 | 0.0058   |
| 15567  | Slc6a4   | solute carrier family 6 (neurotransmitter transporter, serotonin), member 4           | -1.29 | 0.006    |
| 68180  | Hyi      | hydroxypyruvate isomerase (putative)                                                  | -1.29 | 0.0043   |
| 192653 | Ttc36    | tetratricopeptide repeat domain 36                                                    | -1.31 | 0.0019   |
| 76279  | Cyp2d26  | cytochrome P450, family 2, subfamily d, polypeptide 26                                | -1.31 | 0.18     |
| 67473  | Slc47a1  | solute carrier family 47, member 1                                                    | -1.31 | 0.17     |
| 15446  | Hpgd     | hydroxyprostaglandin dehydrogenase 15 (NAD)                                           | -1.34 | 0.06     |
| 12696  | Cirbp    | cold inducible RNA binding protein                                                    | -1.34 | 0.0014   |
| 26458  | Slc27a2  | solute carrier family 27 (fatty acid transporter), member 2                           | -1.35 | 0.0039   |
| 104681 | Slc16a6  | solute carrier family 16 (monocarboxylic acid transporters), member 6                 | -1.37 | 0.0067   |
| 14164  | Fgf1     | fibroblast growth factor 1                                                            | -1.37 | 0.021    |
| 69983  | Sis      | sucrase isomaltase (alpha-glucosidase)                                                | -1.37 | 0.0039   |
| 93695  | Gpnmb    | glycoprotein (transmembrane) nmb                                                      | -1.38 | 0.11     |
| 56350  | Arl3     | ADP-ribosylation factor-like 3                                                        | -1.39 | 4.00E-04 |
| 108099 | Prkag2   | protein kinase, AMP-activated, gamma 2 non-catalytic subunit                          | -1.4  | 0.0035   |
| 232889 | Pla2g4c  | phospholipase A2, group IVC (cytosolic, calcium-independent)                          | -1.4  | 0.22     |
| 209387 | Trim30d  | tripartite motif-containing 30D                                                       | -1.4  | 0.03     |
| 384783 | Irs2     | insulin receptor substrate 2                                                          | -1.43 | 0.0096   |
| 20526  | Slc2a2   | solute carrier family 2 (facilitated glucose transporter), member 2                   | -1.44 | 0.033    |
| 78748  | Rassf10  | Ras association (RalGDS/AF-6) domain family (N-terminal) member 10                    | -1.45 | 0.0065   |
| 27276  | Plekhh1  | pleckstrin homology domain containing, family B (evectins) member 1                   | -1.46 | 0.0011   |
| 11826  | Aqp1     | aquaporin 1                                                                           | -1.46 | 0.021    |
| 235674 | Acaa1b   | acetyl-Coenzyme A acyltransferase 1B                                                  | -1.47 | 0.19     |
| 66116  | Nat8f1   | N-acetyltransferase 8 (GCN5-related) family member 1                                  | -1.48 | 4.00E-04 |
| 69710  | Arap1    | ArfGAP with RhoGAP domain, ankyrin repeat and PH domain 1                             | -1.48 | 0.00034  |
| 20526  | Slc2a2   | solute carrier family 2 (facilitated glucose transporter), member 2                   | -1.54 | 0.067    |
| 66298  | Defa21   | defensin, alpha, 21                                                                   | -1.56 | 0.0033   |
| 76279  | Cyp2d26  | cytochrome P450, family 2, subfamily d, polypeptide 26                                | -1.57 | 0.18     |
| 170442 | Bbox1    | butyrobetaine (gamma), 2-oxoglutarate dioxygenase 1 (gamma-butyrobetaine hydroxylase) | -1.58 | 0.026    |
| 76279  | Cyp2d26  | cytochrome P450, family 2, subfamily d, polypeptide 26                                | -1.59 | 0.14     |
| 20887  | Sult1a1  | sulfotransferase family 1A, phenol-preferring, member 1                               | -1.6  | 0.049    |
| 11826  | Aqp1     | aquaporin 1                                                                           | -1.6  | 0.011    |
| 20019  | Polr1a   | polymerase (RNA) I polypeptide A                                                      | -1.61 | 0.00012  |
| 16204  | Fabp6    | fatty acid binding protein 6, ileal (gastrotropin)                                    | -1.62 | 0.2      |
| 67432  | Hoga1    | 4-hydroxy-2-oxoglutarate aldolase 1                                                   | -1.64 | 0.0047   |
| 381058 | Unc93a   | unc-93 homolog A (C. elegans)                                                         | -1.65 | 0.019    |
| 545902 | Ptprh    | protein tyrosine phosphatase, receptor type, H                                        | -1.67 | 0.0083   |
| 20170  | Hps6     | Hermansky-Pudlak syndrome 6                                                           | -1.72 | 0.00016  |
| 233575 | Pgap2    | post-GPI attachment to proteins 2                                                     | -1.73 | 0.0023   |
| 53315  | Sult1d1  | sulfotransferase family 1D, member 1                                                  | -1.76 | 0.0043   |
| 11997  | Akr1b7   | aldo-keto reductase family 1, member B7                                               | -1.78 | 0.026    |
| 14121  | Fbp1     | fructose biphosphatase 1                                                              | -1.79 | 0.016    |
| 16548  | Khk      | ketoheokinase                                                                         | -1.86 | 0.0085   |
| 16548  | Khk      | ketoheokinase                                                                         | -1.9  | 0.0022   |
| 67432  | Hoga1    | 4-hydroxy-2-oxoglutarate aldolase 1                                                   | -1.9  | 0.013    |
| 14377  | G6pc     | glucose-6-phosphatase, catalytic                                                      | -1.95 | 0.021    |
| 192236 | Hps1     | Hermansky-Pudlak syndrome 1                                                           | -2.05 | 0.00082  |
| 54150  | Rdh7     | retinol dehydrogenase 7                                                               | -2.08 | 0.033    |
| 233549 | Mogat2   | monoacylglycerol O-acyltransferase 2                                                  | -2.12 | 0.0023   |
| 69710  | Arap1    | ArfGAP with RhoGAP domain, ankyrin repeat and PH domain 1                             | -2.12 | 0.0015   |
| 11522  | Adh1     | alcohol dehydrogenase 1 (class I)                                                     | -2.13 | 0.012    |
| 56018  | Stard10  | START domain containing 10                                                            | -2.14 | 0.0017   |
| 12780  | Abcc2    | ATP-binding cassette, sub-family C (CFTR/MRP), member 2                               | -2.18 | 0.0059   |
| 54150  | Rdh7     | retinol dehydrogenase 7                                                               | -2.23 | 0.032    |
| 56388  | Cyp3a25  | cytochrome P450, family 3, subfamily a, polypeptide 25                                | -2.4  | 0.034    |
| 11522  | Adh1     | alcohol dehydrogenase 1 (class I)                                                     | -2.44 | 0.0073   |
| 17921  | Myo7a    | myosin VIIA                                                                           | -2.54 | 0.0032   |
| 13112  | Cyp3a11  | cytochrome P450, family 3, subfamily a, polypeptide 11                                | -2.82 | 0.065    |
| 17701  | Msx1     | msh homeobox 1                                                                        | -3.05 | 0.064    |
| 233549 | Mogat2   | monoacylglycerol O-acyltransferase 2                                                  | -3.14 | 0.0037   |
| 233571 | P2ry6    | pyrimidinergic receptor P2Y, G-protein coupled, 6                                     | -3.31 | 0.00024  |
| 18479  | Pak1     | p21 protein (Cdc42/Rac)-activated kinase 1                                            | -3.4  | 0.003    |
| 68185  | Coa4     | cytochrome c oxidase assembly factor 4                                                | -3.44 | 8.00E-04 |
| 52443  | Mrpl48   | mitochondrial ribosomal protein L48                                                   | -3.56 | 0.0018   |
| 52443  | Mrpl48   | mitochondrial ribosomal protein L48                                                   | -3.77 | 0.0016   |
| 27050  | Rps3     | ribosomal protein S3                                                                  | -6.14 | 0.0025   |

## Supplementary Table S5

Ct values of genes analyzed in the small intestinal epithelium of the indicated mice 7 days after tamoxifen administration; the values were normalized to  $\beta$ -actin gene expression; SD, standard deviation.

| gene name      | Control   |      | <i>Apc</i> <sup>KO/KO</sup> <i>Msx1</i> <sup>+/+</sup> |      | <i>Apc</i> <sup>KO/KO</sup> <i>Msx1</i> <sup>KO/KO</sup> |      |
|----------------|-----------|------|--------------------------------------------------------|------|----------------------------------------------------------|------|
|                | Ct values | SD   | Ct values                                              | SD   | Ct values                                                | SD   |
| Ascl2          | 34.25     | 0.80 | 27.76                                                  | 0.51 | 27.26                                                    | 0.15 |
| Axin2          | 30.52     | 0.74 | 25.49                                                  | 0.58 | 25.27                                                    | 0.11 |
| Chromogranin A | 28.48     | 0.49 | 28.21                                                  | 0.33 | 28.97                                                    | 0.35 |
| GAPDH          | 21.43     | 0.31 | 20.84                                                  | 0.59 | 20.31                                                    | 0.14 |
| Lgr5           | 34.10     | 0.62 | 28.98                                                  | 0.49 | 28.60                                                    | 0.03 |
| Msx1           | 42.54     | 1.51 | 28.95                                                  | 0.95 | 32.64                                                    | 0.72 |
| Msx2           | 45.11     | 0.69 | 34.54                                                  | 0.16 | 34.31                                                    | 1.04 |
| SI             | 25.27     | 0.73 | 27.27                                                  | 0.01 | 28.73                                                    | 0.46 |
| SP5            | 30.74     | 0.46 | 27.34                                                  | 1.19 | 26.73                                                    | 0.15 |

## Supplementary Table S6

Differentially expressed genes ( $|\log_{2}FC| \geq 0.8$ ) in the *Apc/Msx1* double-deficient colonic mucosa when compared to the *Apc*-deficient tissue with intact *Msx1*

| PROBE ID           | ENSEMBL ID         | SYMBOL        | GENENAME                                                                     | log <sub>2</sub> FC | p-value  |
|--------------------|--------------------|---------------|------------------------------------------------------------------------------|---------------------|----------|
| ENSMUST00000094836 | ENSMUSG00000029123 | Stk32b        | serine/threonine kinase 32B                                                  | 2.06e+00            | 3.70e-09 |
| ENSMUST00000103399 | ENSMUSG00000076598 | Igkv3-7       | immunoglobulin kappa variable 3-7                                            | 1.94e+00            | 8.93e-04 |
| ENSMUST00000197560 | ENSMUSG00000076598 | Igkv3-7       | immunoglobulin kappa variable 3-7                                            | 1.94e+00            | 8.93e-04 |
| ENSMUST00000177591 | ENSMUSG00000096768 | Erdr1         | erythroid differentiation regulator 1                                        | 1.48e+00            | 2.43e-02 |
| ENSMUST00000177671 | ENSMUSG00000096768 | Erdr1         | erythroid differentiation regulator 1                                        | 1.44e+00            | 2.60e-02 |
| ENSMUST00000178789 | ENSMUSG00000095562 | Gm21887       | predicted gene, 21887                                                        | 1.37e+00            | 2.73e-02 |
| ENSMUST00000179483 | ENSMUSG00000096768 | Erdr1         | erythroid differentiation regulator 1                                        | 1.37e+00            | 2.73e-02 |
| ENSMUST00000180251 | ENSMUSG00000095562 | Gm21887       | predicted gene, 21887                                                        | 1.37e+00            | 2.73e-02 |
| ENSMUST00000044159 | ENSMUSG00000060807 | Serpina6      | serine (or cysteine) peptidase inhibitor, clade A, member 6                  | 1.36e+00            | 1.54e-04 |
| ENSMUST00000179077 | ENSMUSG00000096768 | Erdr1         | erythroid differentiation regulator 1                                        | 1.34e+00            | 2.64e-02 |
| ENSMUST00000100692 | ENSMUSG00000095528 | Gm10375       | predicted gene 10375                                                         | 1.16e+00            | 3.12e-02 |
| ENSMUST00000163970 | ENSMUSG00000095528 | Gm10375       | predicted gene 10375                                                         | 1.16e+00            | 3.12e-02 |
| ENSMUST00000196706 | ENSMUSG00000027869 | Hsd3b6        | hydroxy-delta-5-steroid dehydrogenase, 3 beta- and steroid delta-isomerase 6 | 1.15e+00            | 4.68e-04 |
| ENSMUST00000211636 | ENSMUSG00000040640 | Erc2          | ELKS/RAB6-interacting/CAST family member 2                                   | 1.15e+00            | 8.61e-04 |
| ENSMUST00000144418 | ENSMUSG00000028469 | Npr2          | natriuretic peptide receptor 2                                               | 1.15e+00            | 1.48e-02 |
| ENSMUST00000172766 | ENSMUSG00000050423 | Ppp1r3g       | protein phosphatase 1, regulatory (inhibitor) subunit 3G                     | 1.13e+00            | 5.97e-03 |
| ENSMUST00000113512 | ENSMUSG00000073643 | Wdfy1         | WD repeat and FYVE domain containing 1                                       | 1.12e+00            | 3.83e-03 |
| ENSMUST00000113513 | ENSMUSG00000073643 | Wdfy1         | WD repeat and FYVE domain containing 1                                       | 1.12e+00            | 3.83e-03 |
| ENSMUST00000113514 | ENSMUSG00000073643 | Wdfy1         | WD repeat and FYVE domain containing 1                                       | 1.12e+00            | 3.83e-03 |
| ENSMUST00000113515 | ENSMUSG00000073643 | Wdfy1         | WD repeat and FYVE domain containing 1                                       | 1.12e+00            | 3.83e-03 |
| ENSMUST00000187005 | ENSMUSG00000073643 | Wdfy1         | WD repeat and FYVE domain containing 1                                       | 1.12e+00            | 3.73e-03 |
| ENSMUST00000203150 | ENSMUSG00000030361 | Klrb1a        | killer cell lectin-like receptor subfamily B member 1A                       | 1.06e+00            | 4.21e-02 |
| ENSMUST00000172486 | ENSMUSG00000015222 | Map2          | microtubule-associated protein 2                                             | 1.05e+00            | 8.34e-03 |
| ENSMUST00000135885 | ENSMUSG00000029095 | Ablim2        | actin-binding LIM protein 2                                                  | 1.04e+00            | 1.43e-04 |
| ENSMUST00000186702 | ENSMUSG00000041460 | Caena2d4      | calcium channel, voltage-dependent, alpha 2/delta subunit 4                  | 1.03e+00            | 5.87e-03 |
| ENSMUST00000131920 | ENSMUSG00000023267 | Gabbr2        | gamma-aminobutyric acid (GABA) C receptor, subunit rho 2                     | 1.03e+00            | 3.48e-02 |
| ENSMUST00000171262 | ENSMUSG00000006711 | D130043K22Rik | RIKEN cDNA D130043K22 gene                                                   | 1.01e+00            | 1.44e-02 |
| ENSMUST00000186394 | ENSMUSG00000074109 | Mrgprx2       | MAS-related GPR, member X2                                                   | 1.00e+00            | 8.34e-03 |
| ENSMUST00000103483 | ENSMUSG00000076674 | Ighv3-8       | immunoglobulin heavy variable V3-8                                           | 9.86e-01            | 3.05e-01 |
| ENSMUST00000185329 | ENSMUSG00000025932 | Eya1          | EYA transcriptional coactivator and phosphatase 1                            | 9.84e-01            | 4.82e-02 |
| ENSMUST00000040361 | ENSMUSG00000039347 | Atp6v0e2      | ATPase, H+ transporting, lysosomal V0 subunit E2                             | 9.79e-01            | 5.14e-03 |
| ENSMUST00000136987 | ENSMUSG00000043587 | Pxylp1        | 2-phosphoxylese phosphatase 1                                                | 9.68e-01            | 9.28e-04 |
| ENSMUST00000144697 | ENSMUSG00000026999 | Nup35         | nucleoporin 35                                                               | 9.67e-01            | 1.95e-02 |
| ENSMUST00000153129 | ENSMUSG00000028047 | Thbs3         | thrombospondin 3                                                             | 9.65e-01            | 4.39e-02 |
| ENSMUST00000103350 | ENSMUSG00000076549 | Igkv4-68      | immunoglobulin kappa variable 4-68                                           | 9.63e-01            | 1.02e-02 |
| ENSMUST00000137290 | ENSMUSG00000031698 | Mylk3         | myosin light chain kinase 3                                                  | 9.62e-01            | 1.37e-02 |
| ENSMUST00000169797 | ENSMUSG00000037849 | Ifi206        | interferon activated gene 206                                                | 9.49e-01            | 7.66e-02 |
| ENSMUST00000155275 | ENSMUSG00000021596 | Mctp1         | multiple C2 domains, transmembrane 1                                         | 9.39e-01            | 6.10e-03 |
| ENSMUST00000162154 | ENSMUSG00000022148 | Fyb           | FYN binding protein                                                          | 9.37e-01            | 1.19e-02 |
| ENSMUST00000161947 | ENSMUSG00000022148 | Fyb           | FYN binding protein                                                          | 9.29e-01            | 7.54e-03 |
| ENSMUST00000190151 | ENSMUSG00000021209 | Ppp4r4        | protein phosphatase 4, regulatory subunit 4                                  | 9.08e-01            | 7.42e-03 |
| ENSMUST00000172478 | ENSMUSG00000074369 | Obox2         | oocyte specific homeobox 2                                                   | 8.92e-01            | 1.01e-02 |
| ENSMUST00000174076 | ENSMUSG00000074369 | Obox2         | oocyte specific homeobox 2                                                   | 8.92e-01            | 1.01e-02 |
| ENSMUST00000174305 | ENSMUSG00000074369 | Obox2         | oocyte specific homeobox 2                                                   | 8.92e-01            | 1.01e-02 |
| ENSMUST00000149336 | ENSMUSG00000029651 | Mtus2         | microtubule associated tumor suppressor candidate 2                          | 8.84e-01            | 5.44e-03 |
| ENSMUST00000194041 | ENSMUSG00000026587 | Astn1         | astrotactin 1                                                                | 8.62e-01            | 1.16e-04 |
| ENSMUST00000213557 | ENSMUSG00000071317 | Bves          | blood vessel epicardial substance                                            | 8.61e-01            | 1.04e-02 |
| ENSMUST00000015576 | ENSMUSG00000022226 | Mcpt2         | mast cell protease 2                                                         | 8.59e-01            | 7.10e-04 |
| ENSMUST00000207685 | ENSMUSG00000035177 | Nlrp2         | NLR family, pyrin domain containing 2                                        | 8.50e-01            | 6.82e-04 |
| ENSMUST00000204277 | ENSMUSG00000039347 | Atp6v0e2      | ATPase, H+ transporting, lysosomal V0 subunit E2                             | 8.50e-01            | 3.72e-03 |
| ENSMUST00000201736 | ENSMUSG00000094719 | Gm5108        | predicted gene 5108                                                          | 8.48e-01            | 1.46e-03 |
| ENSMUST00000135355 | ENSMUSG00000021645 | Snn1          | survival motor neuron 1                                                      | 8.46e-01            | 4.36e-02 |
| ENSMUST00000142251 | ENSMUSG00000051747 | Ttn           | titin                                                                        | 8.43e-01            | 8.03e-02 |
| ENSMUST00000195849 | ENSMUSG00000034837 | Gnat1         | guanine nucleotide binding protein, alpha transducing 1                      | 8.41e-01            | 2.01e-02 |
| ENSMUST00000202984 | ENSMUSG00000006641 | Slc5a6        | solute carrier family 5 (sodium-dependent vitamin transporter), member 6     | 8.29e-01            | 1.50e-02 |
| ENSMUST00000022836 | ENSMUSG00000022227 | Mcpt1         | mast cell protease 1                                                         | 8.28e-01            | 1.36e-02 |
| ENSMUST00000176196 | ENSMUSG00000032595 | Cdhr4         | cadherin-related family member 4                                             | 8.25e-01            | 1.70e-02 |
| ENSMUST00000177093 | ENSMUSG00000032595 | Cdhr4         | cadherin-related family member 4                                             | 8.25e-01            | 1.70e-02 |
| ENSMUST00000141085 | ENSMUSG00000041216 | Clvs1         | clavesin 1                                                                   | 8.23e-01            | 3.49e-02 |
| ENSMUST00000095450 | ENSMUSG00000071178 | Serpina1b     | serine (or cysteine) peptidase inhibitor, clade A, member 1B                 | 8.20e-01            | 2.66e-02 |
| ENSMUST00000164454 | ENSMUSG00000071178 | Serpina1b     | serine (or cysteine) peptidase inhibitor, clade A, member 1B                 | 8.20e-01            | 2.66e-02 |
| ENSMUST00000186166 | ENSMUSG00000071178 | Serpina1b     | serine (or cysteine) peptidase inhibitor, clade A, member 1B                 | 8.20e-01            | 2.66e-02 |
| ENSMUST00000195095 | ENSMUSG00000104098 | AA619741      | expressed sequence AA619741                                                  | 8.18e-01            | 3.66e-02 |
| ENSMUST00000168044 | ENSMUSG00000043557 | Mdga1         | MAM domain containing glycosylphosphatidylinositol anchor 1                  | 8.15e-01            | 2.99e-04 |
| ENSMUST00000189541 | ENSMUSG00000016918 | Sulf1         | sulfatase 1                                                                  | 8.13e-01            | 1.79e-02 |
| ENSMUST00000172308 | ENSMUSG00000072731 | Gm3715        | predicted gene 3715                                                          | 8.08e-01            | 3.60e-03 |
| ENSMUST00000190082 | ENSMUSG00000026246 | Alpp12        | alkaline phosphatase, placental-like 2                                       | 8.08e-01            | 1.82e-02 |
| ENSMUST00000148715 | ENSMUSG00000009246 | Trpm5         | transient receptor potential cation channel, subfamily M, member 5           | 8.06e-01            | 4.03e-02 |
| ENSMUST00000191403 | ENSMUSG0000009826  | Scgb2b10      | secretoglobin, family 2B, member 10                                          | 8.04e-01            | 1.00e-01 |
| ENSMUST00000103323 | ENSMUSG00000076522 | Igkv16-104    | immunoglobulin kappa variable 16-104                                         | 8.00e-01            | 1.14e-01 |

## Supplementary Table S7

Ct values of genes analyzed in the proximal colonic epithelium of the indicated mice 7 days after tamoxifen administration; the values were normalized to  $\beta$ -actin gene expression; SD, standard deviation.

| gene name | Control   |      | <i>Apc</i> <sup>KO/KO</sup> <i>Msx1</i> <sup>+/+</sup> |      | <i>Apc</i> <sup>KO/KO</sup> <i>Msx1</i> <sup>KO/KO</sup> |      |
|-----------|-----------|------|--------------------------------------------------------|------|----------------------------------------------------------|------|
|           | Ct values | SD   | Ct values                                              | SD   | Ct values                                                | SD   |
| Bves      | 37.99     | 3.99 | 40.51                                                  | 1.40 | 40.44                                                    | 2.59 |
| Mdga1     | 31.68     | 1.22 | 33.49                                                  | 0.55 | 32.96                                                    | 0.91 |
| Mtus2     | 32.68     | 1.15 | 35.65                                                  | 0.84 | 35.19                                                    | 0.23 |
| Mylk3     | 37.07     | 1.51 | 39.09                                                  | 0.69 | 38.71                                                    | 1.37 |
| Msx1      | 36.40     | 1.51 | 26.64                                                  | 0.50 | 30.14                                                    | 0.86 |
| Msx2      | 36.94     | 1.06 | 27.23                                                  | 0.62 | 26.55                                                    | 0.33 |
| Slc5a6    | 26.08     | 1.11 | 28.40                                                  | 0.31 | 26.72                                                    | 1.07 |
| Stk32b    | 34.16     | 0.87 | 34.69                                                  | 0.41 | 27.41                                                    | 0.49 |
| Trpm      | 39.73     | 3.53 | 44.12                                                  | 3.19 | 42.30                                                    | 2.30 |
| Ttn       | 40.55     | 1.27 | 40.29                                                  | 0.61 | 40.81                                                    | 2.14 |
| Ubb       | 18.27     | 0.94 | 19.63                                                  | 0.34 | 19.30                                                    | 0.29 |

## Supplementary Table S2

Differentially expressed genes ( $|\log\text{FC}| \geq 1$ ,  $q\text{-value} < 0.05$ ) in the colonic epithelium 2 days upon Apc depletion compared to tissue with intact Apc

| ENTREZ    | SYMBOL      | GENENAME                                                                        | logFC | q-value  |
|-----------|-------------|---------------------------------------------------------------------------------|-------|----------|
| 626708    | Defa26      | defensin, alpha, 26                                                             | 2.38  | 5.00E-04 |
| 13218     | Defa-rs1    | defensin, alpha, related sequence 1                                             | 2.34  | 0.028    |
| 68009     | ILMN_196346 | Mus musculus defensin related cryptdin 20 (Defcr20), mRNA.                      | 2.28  | 0.0037   |
| 13239     | ILMN_196558 | Mus musculus defensin related cryptdin 5 (Defcr5), mRNA.                        | 2.11  | 0.026    |
| 68009     | ILMN_196346 | Mus musculus defensin related cryptdin 20 (Defcr20), mRNA.                      | 2.01  | 0.0037   |
| 100044291 | ILMN_221210 | PREDICTED: Mus musculus hypothetical protein LOC100044291 (LOC100044291), mRNA. | 1.99  | 0.016    |
| 17110     | Lyz1        | lysozyme 1                                                                      | 1.88  | 0.0096   |
| 13216     | ILMN_196581 | Mus musculus defensin, alpha 1 (Defa1), mRNA.                                   | 1.86  | 0.016    |
| 13240     | Defa6       | defensin, alpha, 6                                                              | 1.82  | 0.031    |
| 17110     | Lyz1        | lysozyme 1                                                                      | 1.63  | 0.028    |
| 17748     | Mt1         | metallothionein 1                                                               | 1.35  | 0.031    |
| 11551     | ILMN_190996 | Mus musculus adrenergic receptor, alpha 2a (Adra2a), mRNA.                      | 1.28  | 0.026    |
| 23945     | Mgl1        | monoglyceride lipase                                                            | 1.25  | 0.031    |
| 213391    | Rassf4      | Ras association (RalGDS/AF-6) domain family member 4                            | 1.02  | 0.031    |
| 12231     | Btn1a1      | butyrophilin, subfamily 1, member A1                                            | -1.07 | 0.016    |
| 16987     | ILMN_187484 | Mus musculus lanosterol synthase (Lss), mRNA.                                   | -1.12 | 0.016    |
| 64177     | Trpv6       | transient receptor potential cation channel, subfamily V, member 6              | -1.33 | 0.04     |



## Supplementary Table S2

Differentially expressed genes ( $\log_2FC \geq 1$ ,  $q\text{-value} < 0.05$ ) in the colonic epithelium 4 days upon Apc depletion compared to tissue with intact Apc

| ENTREZ       | SYMBOL        | GENENAME                                                                                                                                    | logFC | q-value  |
|--------------|---------------|---------------------------------------------------------------------------------------------------------------------------------------------|-------|----------|
| 12709.00     | ILMN_193661   | Mus musculus creatine kinase, brain (Ckb), mRNA.                                                                                            | 3.86  | 2.50E-08 |
| 74186.00     | Ccdc3         | coiled-coil domain containing 3                                                                                                             | 3.17  | 6.40E-10 |
| 20568.00     | Slpi          | secretory leukocyte peptidase inhibitor                                                                                                     | 3.09  | 0.00018  |
| 73710.00     | Tubb2b        | tubulin, beta 2B                                                                                                                            | 3.03  | 2.50E-09 |
| 17329.00     | Cxcl9         | chemokine (C-X-C motif) ligand 9                                                                                                            | 2.89  | 3.80E-05 |
| 66141.00     | Ifitm3        | interferon induced transmembrane protein 3                                                                                                  | 2.86  | 8.10E-08 |
| 15945.00     | ILMN_253583   | Mus musculus chemokine (C-X-C motif) ligand 10 (Cxcl10), mRNA.                                                                              | 2.7   | 0.0024   |
| 213948.00    | Atg9b         | ATG9 autophagy related 9 homolog B (S. cerevisiae)                                                                                          | 2.58  | 1.90E-05 |
| 14969.00     | H2-Eb1        | histocompatibility 2, class II antigen E beta                                                                                               | 2.43  | 0.00014  |
| 14570.00     | Arhgdig       | Rho GDP dissociation inhibitor (GDI) gamma                                                                                                  | 2.42  | 3.10E-07 |
| 15930.00     | Ido1          | indoleamine 2,3-dioxygenase 1                                                                                                               | 2.34  | 0.012    |
| 15937.00     | Ier3          | immediate early response 3                                                                                                                  | 2.22  | 1.70E-07 |
| 16010.00     | Igfbp4        | insulin-like growth factor binding protein 4                                                                                                | 2.21  | 1.30E-06 |
| 26897.00     | ILMN_223756   | Mus musculus acyl-CoA thioesterase 1 (Acot1), mRNA.                                                                                         | 2.21  | 8.00E-06 |
| 19752.00     | Rnase1        | ribonuclease, RNase A family, 1 (pancreatic)                                                                                                | 2.19  | 2.60E-05 |
| 66214.00     | 1190002H23Rik | RIKEN cDNA 1190002H23 gene                                                                                                                  | 2.17  | 0.00017  |
| 100047619.00 | ILMN_219663   | PREDICTED: Mus musculus similar to solute carrier family 7 (cationic amino acid transporter, y+ system), member 5 (LOC100047619), misc RNA. | 2.16  | 9.20E-07 |
| 14160.00     | Lgr5          | leucine rich repeat containing G protein coupled receptor 5                                                                                 | 2.13  | 2.40E-07 |
| 270152.00    | Amica1        | adhesion molecule, interacts with CXADR antigen 1                                                                                           | 2.12  | 1.40E-06 |
| 14609.00     | Gja1          | gap junction protein, alpha 1                                                                                                               | 1.99  | 5.50E-05 |
| 11459.00     | Acta1         | actin, alpha 1, skeletal muscle                                                                                                             | 1.99  | 4.90E-05 |
| 27280.00     | Phlda3        | pleckstrin homology-like domain, family A, member 3                                                                                         | 1.98  | 0.00039  |
| 17218.00     | Mcm5          | minichromosome maintenance deficient 5, cell division cycle 46 (S. cerevisiae)                                                              | 1.97  | 2.80E-08 |
| 16145.00     | Igtp          | interferon gamma induced GTPase                                                                                                             | 1.97  | 0.025    |
| 320685.00    | Dctd          | dCMP deaminase                                                                                                                              | 1.95  | 3.10E-05 |
| 328162.00    | Trmt61a       | tRNA methyltransferase 61 homolog A (S. cerevisiae)                                                                                         | 1.95  | 2.50E-06 |
| 100608.00    | Noc4l         | nucleolar complex associated 4 homolog (S. cerevisiae)                                                                                      | 1.93  | 4.00E-06 |
| 17067.00     | Ly6c1         | lymphocyte antigen 6 complex, locus C1                                                                                                      | 1.93  | 0.00015  |
| 11925.00     | Neurog3       | neurogenin 3                                                                                                                                | 1.88  | 9.30E-06 |
| 72462.00     | Rrp1b         | ribosomal RNA processing 1 homolog B (S. cerevisiae)                                                                                        | 1.87  | 9.80E-07 |
| 13401.00     | Dmwd          | dystrophia myotonica-containing WD repeat motif                                                                                             | 1.87  | 1.70E-07 |
| 30927.00     | Snai3         | snail homolog 3 (Drosophila)                                                                                                                | 1.86  | 2.00E-08 |
| 27280.00     | Phlda3        | pleckstrin homology-like domain, family A, member 3                                                                                         | 1.85  | 0.00019  |
| 14028.00     | Evx1          | even skipped homeotic gene 1 homolog                                                                                                        | 1.85  | 2.70E-07 |
| 68915.00     | Vars2         | valyl-tRNA synthetase 2, mitochondrial (putative)                                                                                           | 1.84  | 1.10E-07 |
| 26897.00     | Acot1         | acyl-CoA thioesterase 1                                                                                                                     | 1.82  | 3.90E-06 |
| 102614.00    | Rpp25         | ribonuclease P 25 subunit (human)                                                                                                           | 1.8   | 4.80E-07 |
| 17216.00     | Mcm2          | minichromosome maintenance deficient 2 mitotin (S. cerevisiae)                                                                              | 1.8   | 5.10E-08 |
| 21677.00     | Tead2         | TEA domain family member 2                                                                                                                  | 1.79  | 1.80E-06 |
| 16673.00     | Krt36         | keratin 36                                                                                                                                  | 1.79  | 6.90E-10 |
| 17173.00     | Ascl2         | achaete-scute complex homolog 2 (Drosophila)                                                                                                | 1.79  | 4.40E-05 |
| 20361.00     | Sema7a        | sema domain, immunoglobulin domain (Ig), and GPI membrane anchor, (semaphorin) 7A                                                           | 1.78  | 1.60E-05 |
| 110749.00    | ILMN_215876   | Mus musculus chromatin assembly factor 1, subunit B (p60) (Chaf1b), mRNA.                                                                   | 1.78  | 3.50E-07 |
| 64406.00     | Sp5           | trans-acting transcription factor 5                                                                                                         | 1.77  | 5.80E-07 |
| 18432.00     | Mybbp1a       | MYB binding protein (P160) 1a                                                                                                               | 1.77  | 7.10E-06 |
| 171212.00    | Galnt10       | UDP-N-acetyl-alpha-D-galactosamine:polypeptide N-acetylgalactosaminyltransferase 10                                                         | 1.76  | 3.90E-08 |
| 18383.00     | Tnfrsf11b     | tumor necrosis factor receptor superfamily, member 11b (osteoprotegerin)                                                                    | 1.75  | 8.50E-06 |
| 100608.00    | ILMN_209940   | Mus musculus nucleolar complex associated 4 homolog (S. cerevisiae) (Noc4l), mRNA.                                                          | 1.75  | 2.20E-06 |
| 69902.00     | Mrt4          | MRT4, mRNA turnover 4, homolog (S. cerevisiae)                                                                                              | 1.75  | 5.60E-07 |
| 15469.00     | Prmt1         | protein arginine N-methyltransferase 1                                                                                                      | 1.75  | 4.80E-07 |
| 18780.00     | Pla2g2a       | phospholipase A2, group IIA (platelets, synovial fluid)                                                                                     | 1.74  | 0.00015  |
| 17215.00     | ILMN_213080   | Mus musculus minichromosome maintenance deficient 3 (S. cerevisiae) (Mcm3), mRNA.                                                           | 1.74  | 2.50E-08 |
| 12505.00     | Cd44          | CD44 antigen                                                                                                                                | 1.74  | 3.60E-06 |
| 51797.00     | Ctps          | cytidine 5'-triphosphate synthase                                                                                                           | 1.73  | 3.20E-06 |
| 22321.00     | Vars          | valyl-tRNA synthetase                                                                                                                       | 1.72  | 6.20E-08 |
| 14961.00     | H2-Ab1        | histocompatibility 2, class II antigen A, beta 1                                                                                            | 1.72  | 0.0022   |
| 22041.00     | Trf           | transferrin                                                                                                                                 | 1.71  | 1.10E-06 |
| 14961.00     | H2-Ab1        | histocompatibility 2, class II antigen A, beta 1                                                                                            | 1.71  | 0.0017   |
| 17865.00     | ILMN_212854   | Mus musculus myeloblastosis oncogene-like 2 (Mybl2), mRNA.                                                                                  | 1.7   | 6.40E-10 |
| 71805.00     | Nup93         | nucleoporin 93                                                                                                                              | 1.69  | 1.70E-06 |
| 14998.00     | ILMN_224639   | Mus musculus histocompatibility 2, class II, locus DMA (H2-DMA), mRNA.                                                                      | 1.69  | 0.0018   |
| 73710.00     | 2410129E14Rik | Mus musculus tubulin, beta 2b (Tubb2b), mRNA.                                                                                               | 1.68  | 1.90E-05 |
| 20810.00     | Srm           | spermidine synthase                                                                                                                         | 1.68  | 5.80E-05 |

|              |             |                                                                                                       |      |          |
|--------------|-------------|-------------------------------------------------------------------------------------------------------|------|----------|
| 208638.00    | ILMN_211336 | Mus musculus solute carrier family 25, member 38 (Slc25a38), mRNA.                                    | 1.67 | 6.20E-08 |
| 17319.00     | Mif         | macrophage migration inhibitory factor                                                                | 1.67 | 2.50E-08 |
| 15894.00     | Icam1       | intercellular adhesion molecule 1                                                                     | 1.67 | 0.00034  |
| 20810.00     | Srm         | spermidine synthase                                                                                   | 1.66 | 2.50E-05 |
| 100340.00    | ILMN_210171 | Mus musculus sphingomyelin phosphodiesterase, acid-like 3B (Smpd3b), mRNA.                            | 1.66 | 1.00E-04 |
| 107272.00    | Psat1       | phosphoserine aminotransferase 1                                                                      | 1.66 | 3.20E-05 |
| 67177.00     | Cdt1        | chromatin licensing and DNA replication factor 1                                                      | 1.66 | 1.50E-06 |
| 16149.00     | Cd74        | CD74 antigen (invariant polypeptide of major histocompatibility complex, class II antigen-associated) | 1.66 | 0.013    |
| 51800.00     | Bok         | BCL2-related ovarian killer protein                                                                   | 1.66 | 9.60E-06 |
| 22154.00     | Tubb5       | tubulin, beta 5                                                                                       | 1.65 | 7.30E-07 |
| 66102.00     | Cxcl16      | chemokine (C-X-C motif) ligand 16                                                                     | 1.65 | 0.00027  |
| 233066.00    | A1428936    | expressed sequence A1428936                                                                           | 1.65 | 9.20E-07 |
| 16149.00     | Cd74        | CD74 antigen (invariant polypeptide of major histocompatibility complex, class II antigen-associated) | 1.64 | 0.0081   |
| 27279.00     | Tnfrsf12a   | tumor necrosis factor receptor superfamily, member 12a                                                | 1.63 | 0.0015   |
| 20810.00     | Srm         | spermidine synthase                                                                                   | 1.63 | 8.00E-06 |
| 68147.00     | Gar1        | GAR1 ribonucleoprotein homolog (yeast)                                                                | 1.63 | 1.80E-06 |
| 29870.00     | Gtse1       | G two S phase expressed protein 1                                                                     | 1.63 | 8.90E-06 |
| 226419.00    | Dyrk3       | dual-specificity tyrosine-(Y)-phosphorylation regulated kinase 3                                      | 1.63 | 0.00011  |
| 11792.00     | Apex1       | apurinic/apyrimidinic endonuclease 1                                                                  | 1.62 | 2.10E-06 |
| 20509.00     | Slc19a1     | solute carrier family 19 (sodium/hydrogen exchanger), member 1                                        | 1.62 | 1.10E-06 |
| 18817.00     | Plk1        | polo-like kinase 1 (Drosophila)                                                                       | 1.62 | 3.80E-05 |
| 17220.00     | Mcm7        | minichromosome maintenance deficient 7 (S. cerevisiae)                                                | 1.61 | 9.60E-05 |
| 12505.00     | Cd44        | CD44 antigen                                                                                          | 1.61 | 7.10E-06 |
| 64424.00     | ILMN_189434 | Mus musculus polymerase (RNA) I polypeptide E (Polr1e), mRNA.                                         | 1.6  | 8.00E-06 |
| 13836.00     | Epha2       | Eph receptor A2                                                                                       | 1.6  | 0.00026  |
| 51797.00     | Ctps        | cytidine 5'-triphosphate synthase                                                                     | 1.6  | 4.80E-07 |
| 68337.00     | Crip2       | cysteine rich protein 2                                                                               | 1.6  | 3.40E-06 |
| 217995.00    | ILMN_214317 | Mus musculus HEAT repeat containing 1 (Heatr1), mRNA.                                                 | 1.59 | 7.70E-07 |
| 20595.00     | Smn1        | survival motor neuron 1                                                                               | 1.58 | 6.50E-07 |
| 30877.00     | Gnl3        | guanine nucleotide binding protein-like 3 (nucleolar)                                                 | 1.58 | 2.10E-05 |
| 14114.00     | Fbln1       | fibulin 1                                                                                             | 1.58 | 1.10E-05 |
| 211949.00    | Spsb4       | splA/ryanodine receptor domain and SOCS box containing 4                                              | 1.57 | 5.70E-06 |
| 16010.00     | Igfbp4      | insulin-like growth factor binding protein 4                                                          | 1.57 | 0.00058  |
| 30877.00     | Gnl3        | guanine nucleotide binding protein-like 3 (nucleolar)                                                 | 1.57 | 6.10E-06 |
| 20019.00     | Polr1a      | polymerase (RNA) I polypeptide A                                                                      | 1.56 | 3.50E-07 |
| 12006.00     | Axin2       | axin2                                                                                                 | 1.56 | 8.50E-05 |
| 70024.00     | Mcm10       | minichromosome maintenance deficient 10 (S. cerevisiae)                                               | 1.55 | 8.10E-08 |
| 17110.00     | Lyz1        | lysozyme 1                                                                                            | 1.55 | 0.0053   |
| 353156.00    | Egfl7       | EGF-like domain 7                                                                                     | 1.55 | 2.90E-06 |
| 66953.00     | Cdca7       | cell division cycle associated 7                                                                      | 1.55 | 8.00E-06 |
| 101612.00    | Grwd1       | glutamate-rich WD repeat containing 1                                                                 | 1.54 | 2.20E-06 |
| 27221.00     | Chaf1a      | chromatin assembly factor 1, subunit A (p150)                                                         | 1.54 | 2.00E-07 |
| 244886.00    | A1118078    | expressed sequence A1118078                                                                           | 1.54 | 1.10E-05 |
| 23825.00     | Banf1       | barrier to autointegration factor 1                                                                   | 1.53 | 4.80E-07 |
| 19385.00     | Ranbp1      | RAN binding protein 1                                                                                 | 1.52 | 3.50E-07 |
| 100019.00    | Mdn1        | midasin homolog (yeast)                                                                               | 1.52 | 2.00E-05 |
| 17228.00     | Cma1        | chymase 1, mast cell                                                                                  | 1.52 | 1.60E-05 |
| 12545.00     | Cdc7        | cell division cycle 7 (S. cerevisiae)                                                                 | 1.52 | 1.20E-07 |
| 66350.00     | Pla2g12a    | phospholipase A2, group X1IA                                                                          | 1.51 | 6.80E-06 |
| 13639.00     | Efna4       | ephrin A4                                                                                             | 1.51 | 3.10E-05 |
| 11746.00     | Anxa4       | annexin A4                                                                                            | 1.51 | 0.034    |
| 72462.00     | Rrp1b       | ribosomal RNA processing 1 homolog B (S. cerevisiae)                                                  | 1.5  | 0.0037   |
| 22113.00     | Phlda2      | pleckstrin homology-like domain, family A, member 2                                                   | 1.49 | 0.00031  |
| 100044829.00 | ILMN_209238 | PREDICTED: Mus musculus similar to Fibrillarln, transcript variant 1 (LOC100044829), mRNA.            | 1.49 | 6.40E-07 |
| 17217.00     | Mcm4        | minichromosome maintenance deficient 4 homolog (S. cerevisiae)                                        | 1.48 | 1.70E-06 |
| 100046741.00 | ILMN_190874 | PREDICTED: Mus musculus similar to red-1 (LOC100046741), mRNA.                                        | 1.47 | 1.20E-06 |
| 102657.00    | Cd276       | CD276 antigen                                                                                         | 1.47 | 1.00E-05 |
| 19183.00     | Psme3ip     | proteasome (prosome, macropain) 26S subunit, ATPase 3, interacting protein                            | 1.46 | 1.00E-04 |
| 17219.00     | Mcm6        | minichromosome maintenance deficient 6 (MIS5 homolog, S. pombe) (S. cerevisiae)                       | 1.46 | 3.70E-07 |
| 70024.00     | Mcm10       | minichromosome maintenance deficient 10 (S. cerevisiae)                                               | 1.46 | 1.20E-05 |
| 22321.00     | Vars        | valyl-tRNA synthetase                                                                                 | 1.45 | 7.10E-06 |
| 103733.00    | ILMN_184611 | Mus musculus tubulin, gamma 1 (Tubg1), mRNA.                                                          | 1.45 | 1.00E-04 |
| 22059.00     | Trp53       | transformation related protein 53                                                                     | 1.45 | 6.80E-06 |
| 56390.00     | Ssca1       | Sjogren's syndrome/scleroderma autoantigen 1 homolog (human)                                          | 1.45 | 1.20E-05 |
| 56390.00     | Ssca1       | Sjogren's syndrome/scleroderma autoantigen 1 homolog (human)                                          | 1.45 | 7.10E-07 |
| 641240.00    | ILMN_210638 | PREDICTED: Mus musculus similar to MHC class II antigen beta chain (LOC641240), mRNA.                 | 1.45 | 0.013    |
| 14156.00     | Fen1        | flap structure specific endonuclease 1                                                                | 1.45 | 2.40E-06 |
| 51797.00     | Ctps        | cytidine 5'-triphosphate synthase                                                                     | 1.45 | 2.50E-05 |

|              |             |                                                                                 |      |          |
|--------------|-------------|---------------------------------------------------------------------------------|------|----------|
| 20641.00     | Snrpd1      | small nuclear ribonucleoprotein D1                                              | 1.44 | 3.00E-06 |
| 56520.00     | Nme4        | non-metastatic cells 4, protein expressed in                                    | 1.44 | 1.00E-05 |
| 11475.00     | Acta2       | actin, alpha 2, smooth muscle, aorta                                            | 1.44 | 0.00071  |
| 72821.00     | Scn2b       | sodium channel, voltage-gated, type II, beta                                    | 1.43 | 4.90E-05 |
| 19366.00     | Rad54l      | RAD54 like ( <i>S. cerevisiae</i> )                                             | 1.43 | 3.10E-07 |
| 16918.00     | Myc1        | v-myc myelocytomatosis viral oncogene homolog 1, lung carcinoma derived (avian) | 1.43 | 9.60E-05 |
| 66902.00     | Mtap        | methylthioadenosine phosphorylase                                               | 1.43 | 2.90E-06 |
| 17089.00     | Lyar        | Ly1 antibody reactive clone                                                     | 1.43 | 9.60E-06 |
| 233876.00    | Hirip3      | HIRA interacting protein 3                                                      | 1.43 | 2.00E-07 |
| 14733.00     | Gpc1        | glypican 1                                                                      | 1.43 | 2.40E-06 |
| 56505.00     | Ruvb1l      | RuvB-like protein 1                                                             | 1.42 | 4.60E-07 |
| 57028.00     | Pdxp        | pyridoxal (pyridoxine, vitamin B6) phosphatase                                  | 1.42 | 1.00E-06 |
| 56520.00     | Nme4        | non-metastatic cells 4, protein expressed in                                    | 1.42 | 1.20E-05 |
| 18432.00     | Mybbp1a     | MYB binding protein (P160) 1a                                                   | 1.42 | 0.00016  |
| 67242.00     | Gemin6      | gem (nuclear organelle) associated protein 6                                    | 1.42 | 3.70E-06 |
| 11461.00     | Actb        | actin, beta                                                                     | 1.42 | 0.029    |
| 18140.00     | Uhrf1       | ubiquitin-like, containing PHD and RING finger domains, 1                       | 1.41 | 3.20E-06 |
| 54563.00     | Nup210      | nucleoporin 210                                                                 | 1.41 | 6.50E-06 |
| 17110.00     | Lyz1        | lysozyme 1                                                                      | 1.41 | 0.00081  |
| 15505.00     | Hsph1       | heat shock 105kDa/110kDa protein 1                                              | 1.41 | 3.50E-05 |
| 100102.00    | Pcsk9       | proprotein convertase subtilisin/kexin type 9                                   | 1.4  | 8.10E-05 |
| 67134.00     | Nop56       | NOP56 ribonucleoprotein homolog (yeast)                                         | 1.4  | 9.40E-05 |
| 14961.00     | H2-Ab1      | histocompatibility 2, class II antigen A, beta 1                                | 1.4  | 0.0076   |
| 227358.00    | Fam132b     | family with sequence similarity 132, member B                                   | 1.4  | 6.50E-06 |
| 110956.00    | D17H6S56E-5 | DNA segment, Chr 17, human D6S56E 5                                             | 1.39 | 3.50E-05 |
| 434341.00    | Nlr5        | NLR family, CARD domain containing 5                                            | 1.39 | 0.013    |
| 73284.00     | Ddit4l      | DNA-damage-inducible transcript 4-like                                          | 1.38 | 0.0017   |
| 12443.00     | Cend1       | cyclin D1                                                                       | 1.38 | 3.50E-07 |
| 381101.00    | BC048355    | cDNA sequence BC048355                                                          | 1.38 | 1.90E-05 |
| 67236.00     | Cinp        | cyclin-dependent kinase 2 interacting protein                                   | 1.38 | 3.20E-06 |
| 52530.00     | Nhp2        | NHP2 ribonucleoprotein homolog (yeast)                                          | 1.37 | 1.60E-05 |
| 105837.00    | Mtbp        | Mdm2, transformed 3T3 cell double minute p53 binding protein                    | 1.37 | 6.20E-08 |
| 13555.00     | E2f1        | E2F transcription factor 1                                                      | 1.37 | 3.50E-07 |
| 70333.00     | Cd3eap      | CD3E antigen, epsilon polypeptide associated protein                            | 1.37 | 0.00012  |
| 21354.00     | Tap1        | transporter 1, ATP-binding cassette, sub-family B (MDR/TAP)                     | 1.36 | 0.0067   |
|              | ILMN_187520 |                                                                                 | 1.36 | 9.60E-05 |
| 67671.00     | Rpl38       | ribosomal protein L38                                                           | 1.36 | 0.00025  |
| 59028.00     | Rcl1        | RNA terminal phosphate cyclase-like 1                                           | 1.36 | 4.90E-05 |
| 100044103.00 | ILMN_210607 | PREDICTED: Mus musculus similar to mKIAA1645 protein (LOC100044103), mRNA.      | 1.36 | 6.90E-05 |
| 12544.00     | Cdc45       | cell division cycle 45 homolog ( <i>S. cerevisiae</i> )                         | 1.36 | 2.50E-06 |
| 14450.00     | Gart        | phosphoribosylglycinamide formyltransferase                                     | 1.35 | 3.40E-05 |
| 22051.00     | Trip6       | thyroid hormone receptor interactor 6                                           | 1.34 | 8.30E-05 |
| 21915.00     | Dtymk       | deoxythymidylate kinase                                                         | 1.34 | 2.00E-04 |
| 330671.00    | B4galnt4    | beta-1,4-N-acetyl-galactosaminyl transferase 4                                  | 1.34 | 1.90E-05 |
| 11792.00     | Apex1       | apurinic/apyrimidinic endonuclease 1                                            | 1.34 | 0.00061  |
| 66965.00     | ILMN_198892 | Mus musculus RIKEN cDNA 2310061F22 gene (2310061F22Rik), mRNA.                  | 1.34 | 4.60E-07 |
| 98170.00     | Tmem132a    | transmembrane protein 132A                                                      | 1.33 | 7.50E-05 |
| 98170.00     | Tmem132a    | transmembrane protein 132A                                                      | 1.33 | 2.20E-06 |
| 245688.00    | ILMN_215499 | Mus musculus retinoblastoma binding protein 7 (Rbbp7), mRNA.                    | 1.33 | 2.00E-04 |
| 56361.00     | Pus1        | pseudouridine synthase 1                                                        | 1.33 | 2.30E-06 |
| 105837.00    | Mtbp        | Mdm2, transformed 3T3 cell double minute p53 binding protein                    | 1.33 | 2.10E-06 |
| 14999.00     | H2-DMb1     | histocompatibility 2, class II, locus Mb1                                       | 1.33 | 0.0048   |
| 14038.00     | Expi        | extracellular proteinase inhibitor                                              | 1.33 | 1.70E-05 |
| 109857.00    | Cbr3        | carbonyl reductase 3                                                            | 1.33 | 0.0076   |
| 406217.00    | ILMN_231589 | Mus musculus brain expressed gene 4 (Bex4), mRNA.                               | 1.33 | 9.60E-06 |
| 20641.00     | Snrpd1      | small nuclear ribonucleoprotein D1                                              | 1.32 | 4.50E-06 |
| 56505.00     | Ruvb1l      | RuvB-like protein 1                                                             | 1.32 | 1.50E-06 |
| 17304.00     | Mfge8       | milk fat globule-EGF factor 8 protein                                           | 1.32 | 0.00018  |
| 12028.00     | Bax         | BCL2-associated X protein                                                       | 1.32 | 0.00012  |
| 56279.00     | Fam69b      | family with sequence similarity 69, member B                                    | 1.32 | 6.10E-06 |
| 21681.00     | Thoc4       | THO complex 4                                                                   | 1.31 | 2.10E-05 |
| 17427.00     | Mns1        | meiosis-specific nuclear structural protein 1                                   | 1.31 | 3.30E-06 |
| 15361.00     | Hmgal       | high mobility group AT-hook 1                                                   | 1.31 | 0.00044  |
| 217995.00    | ILMN_214317 | Mus musculus HEAT repeat containing 1 (Heatr1), mRNA.                           | 1.31 | 0.00012  |
| 12265.00     | Ciita       | class II transactivator                                                         | 1.31 | 0.002    |
| 71449.00     | ILMN_221329 | Mus musculus RIKEN cDNA 5630401D24 gene (5630401D24Rik), mRNA.                  | 1.31 | 0.00022  |
| 93840.00     | Vangl2      | vang-like 2 (van gogh, <i>Drosophila</i> )                                      | 1.3  | 4.60E-05 |
| 78294.00     | Rps27a      | ribosomal protein S27A                                                          | 1.3  | 1.70E-05 |

|           |               |                                                                                                 |      |          |
|-----------|---------------|-------------------------------------------------------------------------------------------------|------|----------|
| 13639.00  | Efna4         | ephrin A4                                                                                       | 1.3  | 3.50E-05 |
| 21983.00  | Tpbg          | trophoblast glycoprotein                                                                        | 1.29 | 2.60E-06 |
| 21973.00  | Top2a         | topoisomerase (DNA) II alpha                                                                    | 1.29 | 0.00026  |
| 108037.00 | Shmt2         | serine hydroxymethyltransferase 2 (mitochondrial)                                               | 1.29 | 6.70E-06 |
| 67223.00  | Rrp15         | ribosomal RNA processing 15 homolog (S. cerevisiae)                                             | 1.29 | 3.40E-05 |
| 12443.00  | Cnd1          | cyclin D1                                                                                       | 1.29 | 5.40E-05 |
| 12153.00  | Bmp1          | bone morphogenetic protein 1                                                                    | 1.29 | 2.40E-05 |
| 18971.00  | Pold1         | polymerase (DNA directed), delta 1, catalytic subunit                                           | 1.28 | 4.90E-05 |
| 18969.00  | Pola2         | polymerase (DNA directed), alpha 2                                                              | 1.28 | 6.40E-06 |
| 27756.00  | Lsm2          | LSM2 homolog, U6 small nuclear RNA associated (S. cerevisiae)                                   | 1.28 | 3.40E-06 |
| 116701.00 | ILMN_211983   | Mus musculus fibroblast growth factor receptor-like 1 (Fgfr1), mRNA.                            | 1.28 | 1.10E-05 |
| 214901.00 | Chtf18        | CTF18, chromosome transmission fidelity factor 18 homolog (S. cerevisiae)                       | 1.28 | 7.60E-06 |
| 72640.00  | Mex3a         | mex3 homolog A (C. elegans)                                                                     | 1.27 | 2.40E-06 |
| 17357.00  | Marcks11      | MARCKS-like 1                                                                                   | 1.27 | 0.00023  |
| 110033.00 | Kif22         | kinesin family member 22                                                                        | 1.27 | 1.00E-05 |
| 110006.00 | ILMN_221841   | Mus musculus glucuronidase, beta (Gusb), mRNA.                                                  | 1.27 | 2.20E-05 |
| 14450.00  | Gart          | phosphoribosylglycinamide formyltransferase                                                     | 1.27 | 9.60E-05 |
| 104156.00 | Etv5          | ets variant gene 5                                                                              | 1.27 | 0.00019  |
| 12144.00  | Blm           | Bloom syndrome, RecQ helicase-like                                                              | 1.27 | 1.40E-05 |
| 71242.00  | Spata24       | spermatogenesis associated 24                                                                   | 1.27 | 7.90E-05 |
| 214572.00 | Prmt7         | protein arginine N-methyltransferase 7                                                          | 1.26 | 1.10E-05 |
| 53605.00  | ILMN_214137   | Mus musculus nucleosome assembly protein 1-like 1 (Nap11), mRNA.                                | 1.26 | 1.30E-05 |
| 17869.00  | Myc           | myelocytomatosis oncogene                                                                       | 1.26 | 0.00011  |
| 17110.00  | Lyz1          | lysozyme 1                                                                                      | 1.26 | 0.0024   |
| 17228.00  | Cma1          | chymase 1, mast cell                                                                            | 1.26 | 6.50E-05 |
| 52276.00  | Cdca8         | cell division cycle associated 8                                                                | 1.26 | 9.30E-06 |
| 69928.00  | Aptd1         | apoptosis-inducing, TAF9-like domain 1                                                          | 1.26 | 0.00026  |
| 80914.00  | Uck2          | uridine-cytidine kinase 2                                                                       | 1.25 | 1.80E-05 |
| 104367.00 | Snora65       | small nucleolar RNA, H/ACA box 65                                                               | 1.25 | 4.00E-05 |
| 245688.00 | ILMN_215499   | Mus musculus retinoblastoma binding protein 7 (Rbbp7), mRNA.                                    | 1.25 | 0.0014   |
| 68294.00  | Mfsd10        | major facilitator superfamily domain containing 10                                              | 1.25 | 1.60E-05 |
|           | ILMN_208668   |                                                                                                 | 1.25 | 8.90E-06 |
| 66570.00  | Cenpm         | centromere protein M                                                                            | 1.25 | 3.10E-07 |
| 237038.00 | Nox1          | NADPH oxidase 1                                                                                 | 1.24 | 0.0092   |
| 18102.00  | ILMN_209549   | Mus musculus non-metastatic cells 1, protein (NM23A) expressed in (Nme1), mRNA.                 | 1.24 | 1.80E-06 |
| 108673.00 | Ccdc86        | coiled-coil domain containing 86                                                                | 1.24 | 0.00035  |
| 57315.00  | Wdr46         | WD repeat domain 46                                                                             | 1.23 | 6.10E-05 |
| 72787.00  | Tmem48        | transmembrane protein 48                                                                        | 1.23 | 1.20E-05 |
| 236539.00 | ILMN_226456   | Mus musculus 3-phosphoglycerate dehydrogenase (Phgdh), mRNA.                                    | 1.23 | 0.00052  |
| 234865.00 | Nup133        | nucleoporin 133                                                                                 | 1.23 | 1.80E-05 |
| 67711.00  | Nsmce1        | non-SMC element 1 homolog (S. cerevisiae)                                                       | 1.23 | 2.00E-04 |
| 27993.00  | Imp4          | IMP4, U3 small nucleolar ribonucleoprotein, homolog (yeast)                                     | 1.23 | 7.10E-06 |
| 434632.00 | BC085271      | cDNA sequence BC085271                                                                          | 1.23 | 0.00032  |
| 56412.00  | 2610024G14Rik | RIKEN cDNA 2610024G14 gene                                                                      | 1.23 | 1.80E-05 |
| 68926.00  | Ubap2         | ubiquitin-associated protein 2                                                                  | 1.22 | 3.00E-06 |
| 20174.00  | Ruvb12        | RuvB-like protein 2                                                                             | 1.22 | 3.50E-06 |
| 19891.00  | Rpa2          | replication protein A2                                                                          | 1.22 | 0.00017  |
| 59028.00  | Rcl1          | RNA terminal phosphate cyclase-like 1                                                           | 1.22 | 0.00046  |
| 106582.00 | Nrm           | nurim (nuclear envelope membrane protein)                                                       | 1.22 | 2.00E-06 |
| 17748.00  | Mt1           | metallothionein 1                                                                               | 1.22 | 0.00092  |
| 15114.00  | Hap1          | huntingtin-associated protein 1                                                                 | 1.22 | 0.00011  |
| 66570.00  | Cenpm         | centromere protein M                                                                            | 1.22 | 2.10E-06 |
| 59053.00  | Fam203a       | family with sequence similarity 203, member A                                                   | 1.22 | 1.00E-05 |
| 17299.00  | Mett1         | methyltransferase like 1                                                                        | 1.21 | 0.00049  |
| 110006.00 | Gusb          | glucuronidase, beta                                                                             | 1.21 | 7.80E-05 |
| 14630.00  | Gclm          | glutamate-cysteine ligase, modifier subunit                                                     | 1.21 | 2.70E-06 |
| 69639.00  | Exosc8        | exosome component 8                                                                             | 1.21 | 1.80E-05 |
| 80914.00  | Uck2          | uridine-cytidine kinase 2                                                                       | 1.2  | 1.50E-05 |
| 110816.00 | ILMN_212496   | Mus musculus PWP2 periodic tryptophan protein homolog (yeast) (Pwp2), mRNA.                     | 1.2  | 0.00013  |
| 654467.00 | ILMN_234090   | Mus musculus heterogeneous nuclear ribonucleoprotein A1 pseudogene (LOC654467) on chromosome 9. | 1.2  | 0.00031  |
| 209737.00 | ILMN_212864   | Mus musculus kinesin family member 15 (Kif15), mRNA.                                            | 1.2  | 6.50E-06 |
| 272359.00 | Irf2bp1       | interferon regulatory factor 2 binding protein 1                                                | 1.2  | 1.30E-05 |
| 14916.00  | Guca2b        | guanylate cyclase activator 2b (retina)                                                         | 1.2  | 0.00029  |
| 381903.00 | Alg8          | asparagine-linked glycosylation 8 homolog (yeast, alpha-1,3-glucosyltransferase)                | 1.2  | 5.60E-06 |
| 104732.00 | 4930427A07Rik | RIKEN cDNA 4930427A07 gene                                                                      | 1.2  | 0.00013  |
| 72657.00  | 2700094K13Rik | RIKEN cDNA 2700094K13 gene                                                                      | 1.2  | 1.60E-05 |
| 57257.00  | Vav3          | vav 3 oncogene                                                                                  | 1.19 | 2.40E-06 |
| 20133.00  | ILMN_231868   | Mus musculus ribonucleotide reductase M1 (Rrm1), mRNA.                                          | 1.19 | 8.90E-05 |

|           |               |                                                                                  |      |          |
|-----------|---------------|----------------------------------------------------------------------------------|------|----------|
| 245688.00 | ILMN_215499   | Mus musculus retinoblastoma binding protein 7 (Rbbp7), mRNA.                     | 1.19 | 6.00E-04 |
| 226519.00 | ILMN_232528   | Mus musculus laminin, gamma 1 (Lamc1), mRNA.                                     | 1.19 | 0.00037  |
| 23834.00  | Cdc6          | cell division cycle 6 homolog ( <i>S. cerevisiae</i> )                           | 1.19 | 4.80E-06 |
| 69719.00  | Cad           | carbamoyl-phosphate synthetase 2, aspartate transcarbamylase, and dihydroorotase | 1.19 | 0.00035  |
| 14025.00  | Bc11a         | B-cell CLL/lymphoma 11A (zinc finger protein)                                    | 1.19 | 3.80E-05 |
| 74254.00  | Gpn1          | GPN-loop GTPase 1                                                                | 1.18 | 5.50E-05 |
| 22256.00  | Ung           | uracil DNA glycosylase                                                           | 1.18 | 1.00E-04 |
| 21849.00  | Trim28        | tripartite motif-containing 28                                                   | 1.18 | 2.20E-05 |
| 75273.00  | Pelp1         | proline, glutamic acid and leucine rich protein 1                                | 1.18 | 0.00014  |
| 70572.00  | Ipo5          | importin 5                                                                       | 1.18 | 2.90E-06 |
| 15312.00  | Hmgn1         | high mobility group nucleosomal binding domain 1                                 | 1.18 | 1.10E-05 |
| 20624.00  | Eftud2        | elongation factor Tu GTP binding domain containing 2                             | 1.18 | 1.00E-05 |
| 27407.00  | Abcf2         | ATP-binding cassette, sub-family F (GCN20), member 2                             | 1.18 | 5.70E-06 |
| 56412.00  | 2610024G14Rik | RIKEN cDNA 2610024G14 gene                                                       | 1.18 | 1.30E-05 |
| 21781.00  | Tfdp1         | transcription factor Dp 1                                                        | 1.17 | 1.50E-05 |
| 27966.00  | Rrp9          | RRP9, small subunit (SSU) processome component, homolog (yeast)                  | 1.17 | 0.00013  |
| 72151.00  | Rfc5          | replication factor C (activator 1) 5                                             | 1.17 | 1.10E-06 |
| 57785.00  | Rangrf        | RAN guanine nucleotide release factor                                            | 1.17 | 6.20E-05 |
| 19679.00  | Pitpnm2       | phosphatidylinositol transfer protein, membrane-associated 2                     | 1.17 | 6.10E-05 |
| 17975.00  | Ncl           | nucleolin                                                                        | 1.17 | 6.80E-06 |
| 16881.00  | Lig1          | ligase 1, DNA, ATP-dependent                                                     | 1.17 | 4.20E-05 |
| 23886.00  | Gdf15         | growth differentiation factor 15                                                 | 1.17 | 0.042    |
| 55932.00  | Gbp3          | guanylate binding protein 3                                                      | 1.17 | 0.019    |
| 434858.00 | ILMN_233946   | Mus musculus predicted gene, EG434858 (EG434858), non-coding RNA.                | 1.17 | 0.0046   |
| 72082.00  | Cyp2c55       | cytochrome P450, family 2, subfamily c, polypeptide 55                           | 1.17 | 0.026    |
| 107995.00 | Cdc20         | cell division cycle 20 homolog ( <i>S. cerevisiae</i> )                          | 1.17 | 0.00023  |
| 230991.00 | B930041F14Rik | RIKEN cDNA B930041F14 gene                                                       | 1.17 | 1.80E-05 |
| 71242.00  | Spata24       | spermatogenesis associated 24                                                    | 1.17 | 5.10E-06 |
| 28035.00  | Usp39         | ubiquitin specific peptidase 39                                                  | 1.16 | 9.60E-06 |
| 63959.00  | Slc29a1       | solute carrier family 29 (nucleoside transporters), member 1                     | 1.16 | 0.00045  |
| 67824.00  | Nmral1        | NmrA-like family domain containing 1                                             | 1.16 | 9.60E-06 |
| 60441.00  | Mrpl38        | mitochondrial ribosomal protein L38                                              | 1.16 | 6.70E-05 |
| 12462.00  | Cct3          | chaperonin containing Tcp1, subunit 3 (gamma)                                    | 1.16 | 3.50E-05 |
| 330050.00 | Fam185a       | family with sequence similarity 185, member A                                    | 1.16 | 4.50E-06 |
| 22294.00  | Uxt           | ubiquitously expressed transcript                                                | 1.15 | 8.00E-06 |
| 19245.00  | Ptp4a3        | protein tyrosine phosphatase 4a3                                                 | 1.15 | 0.0011   |
| 215387.00 | Ncaph         | non-SMC condensin I complex, subunit H                                           | 1.15 | 0.00052  |
| 17938.00  | Naca          | nascent polypeptide-associated complex alpha polypeptide                         | 1.15 | 2.10E-06 |
| 66973.00  | Mrps18b       | mitochondrial ribosomal protein S18B                                             | 1.15 | 1.00E-05 |
|           | ILMN_199160   |                                                                                  | 1.15 | 0.0044   |
| 16201.00  | Ilf3          | interleukin enhancer binding factor 3                                            | 1.15 | 3.60E-06 |
| 13433.00  | Dnmt1         | DNA methyltransferase (cytosine-5) 1                                             | 1.15 | 0.00012  |
| 18117.00  | Cox4nb        | COX4 neighbor                                                                    | 1.15 | 7.60E-06 |
| 12740.00  | Cldn4         | claudin 4                                                                        | 1.15 | 0.0016   |
| 102920.00 | Cenpi         | centromere protein I                                                             | 1.15 | 0.00071  |
| 107995.00 | Cdc20         | cell division cycle 20 homolog ( <i>S. cerevisiae</i> )                          | 1.15 | 0.00046  |
| 12181.00  | Bop1          | block of proliferation 1                                                         | 1.15 | 0.00014  |
| 23825.00  | Banf1         | barrier to autointegration factor 1                                              | 1.15 | 9.80E-05 |
| 56412.00  | 2610024G14Rik | RIKEN cDNA 2610024G14 gene                                                       | 1.15 | 8.00E-06 |
| 21844.00  | Tiam1         | T-cell lymphoma invasion and metastasis 1                                        | 1.14 | 1.90E-05 |
| 67390.00  | Rnmt1         | RNA methyltransferase like 1                                                     | 1.14 | 6.90E-05 |
| 78929.00  | ILMN_209245   | Mus musculus polymerase (RNA) III (DNA directed) polypeptide H (Polr3h), mRNA.   | 1.14 | 9.60E-06 |
| 66667.00  | Hspbap1       | Hspb associated protein 1                                                        | 1.14 | 4.00E-05 |
| 55927.00  | Hes6          | hairy and enhancer of split 6 ( <i>Drosophila</i> )                              | 1.14 | 7.60E-06 |
| 14776.00  | Gpx2          | glutathione peroxidase 2                                                         | 1.14 | 1.10E-05 |
| 14114.00  | Fbln1         | fibulin 1                                                                        | 1.14 | 0.00044  |
| 76267.00  | Fads1         | fatty acid desaturase 1                                                          | 1.14 | 4.20E-05 |
| 71919.00  | Rpap3         | RNA polymerase II associated protein 3                                           | 1.14 | 0.00011  |
| 66912.00  | Bzw2          | basic leucine zipper and W2 domains 2                                            | 1.14 | 0.00012  |
| 11799.00  | Birc5         | baculoviral IAP repeat-containing 5                                              | 1.14 | 2.00E-05 |
| 66131.00  | Tipin         | timeless interacting protein                                                     | 1.13 | 6.10E-05 |
| 225608.00 | Sh3tc2        | SH3 domain and tetratricopeptide repeats 2                                       | 1.13 | 0.00034  |
| 20135.00  | ILMN_225236   | Mus musculus ribonucleotide reductase M2 (Rrm2), mRNA.                           | 1.13 | 0.00016  |
| 26564.00  | Ror2          | receptor tyrosine kinase-like orphan receptor 2                                  | 1.13 | 0.00058  |
| 14208.00  | Ppm1g         | protein phosphatase 1G (formerly 2C), magnesium-dependent, gamma isoform         | 1.13 | 4.00E-05 |
| 18972.00  | Pold2         | polymerase (DNA directed), delta 2, regulatory subunit                           | 1.13 | 6.60E-06 |
| 18221.00  | Nudc          | nuclear distribution gene C homolog ( <i>Aspergillus</i> )                       | 1.13 | 3.50E-06 |
| 18221.00  | Nudc          | nuclear distribution gene C homolog ( <i>Aspergillus</i> )                       | 1.13 | 0.00019  |

|              |               |                                                                                                        |      |          |
|--------------|---------------|--------------------------------------------------------------------------------------------------------|------|----------|
| 50927.00     | ILMN_211691   | Mus musculus nuclear autoantigenic sperm protein (histone-binding) (Nasp), transcript variant 2, mRNA. | 1.13 | 5.50E-05 |
| 70082.00     | Lysmd2        | LysM, putative peptidoglycan-binding, domain containing 2                                              | 1.13 | 0.0014   |
| 100047155.00 | ILMN_221233   | PREDICTED: Mus musculus similar to Small nuclear ribonucleoprotein polypeptide A (LOC100047155), mRNA. | 1.13 | 7.00E-06 |
| 100042777.00 | ILMN_212781   | PREDICTED: Mus musculus similar to human protein homologous to DROER protein (LOC100042777), mRNA.     | 1.13 | 2.80E-06 |
| 69550.00     | Bst2          | bone marrow stromal cell antigen 2                                                                     | 1.13 | 6.20E-05 |
| 12144.00     | Blm           | Bloom syndrome, RecQ helicase-like                                                                     | 1.13 | 2.10E-05 |
| 11799.00     | Birc5         | baculoviral IAP repeat-containing 5                                                                    | 1.13 | 0.00037  |
| 406217.00    | Bex4          | brain expressed gene 4                                                                                 | 1.13 | 0.0076   |
| 66422.00     | Dctpp1        | dCTP pyrophosphatase 1                                                                                 | 1.13 | 0.00014  |
| 107071.00    | Wdr74         | WD repeat domain 74                                                                                    | 1.12 | 6.10E-05 |
| 66409.00     | Rsl1d1        | ribosomal L1 domain containing 1                                                                       | 1.12 | 1.90E-05 |
| 28000.00     | Prpf19        | PRP19/PSO4 pre-mRNA processing factor 19 homolog (S. cerevisiae)                                       | 1.12 | 1.70E-05 |
| 11545.00     | Parp1         | poly (ADP-ribose) polymerase family, member 1                                                          | 1.12 | 5.40E-05 |
| 677205.00    | ILMN_212422   | PREDICTED: Mus musculus similar to DEAD (Asp-Glu-Ala-Asp) box polypeptide 18 (LOC677205), misc RNA.    | 1.12 | 7.60E-06 |
| 105988.00    | Esp11         | extra spindle poles-like 1 (S. cerevisiae)                                                             | 1.12 | 2.20E-05 |
| 103551.00    | E130012A19Rik | RIKEN cDNA E130012A19 gene                                                                             | 1.12 | 0.0033   |
| 108888.00    | Atad3a        | ATPase family, AAA domain containing 3A                                                                | 1.12 | 4.90E-05 |
| 27407.00     | Abcf2         | ATP-binding cassette, sub-family F (GCN20), member 2                                                   | 1.12 | 2.00E-06 |
| 22294.00     | Uxt           | ubiquitously expressed transcript                                                                      | 1.11 | 3.80E-06 |
| 22143.00     | Tuba1b        | tubulin, alpha 1B                                                                                      | 1.11 | 4.00E-05 |
| 268396.00    | Sh3pxd2b      | SH3 and PX domains 2B                                                                                  | 1.11 | 6.90E-05 |
| 100088.00    | Rcc1          | regulator of chromosome condensation 1                                                                 | 1.11 | 3.50E-05 |
| 71974.00     | Prmt3         | protein arginine N-methyltransferase 3                                                                 | 1.11 | 2.10E-05 |
| 100043257.00 | ILMN_215552   | PREDICTED: Mus musculus similar to RNA binding motif protein 3 (LOC100043257), mRNA.                   | 1.11 | 4.50E-06 |
| 57905.00     | Isy1          | ISY1 splicing factor homolog (S. cerevisiae)                                                           | 1.11 | 8.50E-06 |
| 93695.00     | Gpmb          | glycoprotein (transmembrane) nmb                                                                       | 1.11 | 0.027    |
| 227715.00    | Exosc2        | exosome component 2                                                                                    | 1.11 | 0.00012  |
| 71963.00     | Cdca4         | cell division cycle associated 4                                                                       | 1.11 | 1.40E-05 |
| 11799.00     | Birc5         | baculoviral IAP repeat-containing 5                                                                    | 1.11 | 8.90E-05 |
| 170759.00    | Atp13a1       | ATPase type 13A1                                                                                       | 1.11 | 0.00094  |
| 21817.00     | Tgm2          | transglutaminase 2, C polypeptide                                                                      | 1.1  | 0.0012   |
| 214572.00    | Prmt7         | protein arginine N-methyltransferase 7                                                                 | 1.1  | 3.50E-05 |
| 27374.00     | ILMN_257867   | Mus musculus protein arginine N-methyltransferase 5 (Prmt5), mRNA.                                     | 1.1  | 0.00032  |
| 56031.00     | Ppie          | peptidylprolyl isomerase E (cyclophilin E)                                                             | 1.1  | 4.40E-05 |
| 211548.00    | Nomo1         | nodal modulator 1                                                                                      | 1.1  | 1.40E-05 |
| 97961.00     | Nol12         | nucleolar protein 12                                                                                   | 1.1  | 2.60E-05 |
| 110109.00    | Nop2          | NOP2 nucleolar protein homolog (yeast)                                                                 | 1.1  | 0.00034  |
| 66978.00     | Luc7l         | Luc7 homolog (S. cerevisiae)-like                                                                      | 1.1  | 6.50E-05 |
| 55944.00     | Eif3d         | eukaryotic translation initiation factor 3, subunit D                                                  | 1.1  | 0.00014  |
| 107995.00    | Cdc20         | cell division cycle 20 homolog (S. cerevisiae)                                                         | 1.1  | 0.00011  |
| 71449.00     | ILMN_221329   | Mus musculus RIKEN cDNA 5630401D24 gene (5630401D24Rik), mRNA.                                         | 1.1  | 8.10E-05 |
| 68026.00     | 2810417H13Rik | RIKEN cDNA 2810417H13 gene                                                                             | 1.1  | 0.002    |
| 232679.00    | Zc3hc1        | zinc finger, C3HC type 1                                                                               | 1.09 | 6.70E-05 |
| 230734.00    | Yrdc          | yrdC domain containing (E.coli)                                                                        | 1.09 | 0.00022  |
| 72171.00     | Shq1          | SHQ1 homolog (S. cerevisiae)                                                                           | 1.09 | 6.50E-06 |
| 107094.00    | Rrp12         | ribosomal RNA processing 12 homolog (S. cerevisiae)                                                    | 1.09 | 7.80E-05 |
| 20085.00     | Rps19         | ribosomal protein S19                                                                                  | 1.09 | 5.40E-05 |
| 27374.00     | Prmt5         | protein arginine N-methyltransferase 5                                                                 | 1.09 | 4.90E-05 |
| 27374.00     | Prmt5         | protein arginine N-methyltransferase 5                                                                 | 1.09 | 1.10E-05 |
| 56452.00     | Orc6          | origin recognition complex, subunit 6                                                                  | 1.09 | 3.90E-06 |
| 68294.00     | Mfsd10        | major facilitator superfamily domain containing 10                                                     | 1.09 | 1.10E-05 |
| 17083.00     | Tmed1         | transmembrane emp24 domain containing 1                                                                | 1.09 | 5.80E-05 |
| 22379.00     | Fmnl3         | formin-like 3                                                                                          | 1.09 | 0.00023  |
| 13877.00     | ILMN_212781   | Mus musculus enhancer of rudimentary homolog (Drosophila) (Erh), mRNA.                                 | 1.09 | 1.40E-05 |
| 68087.00     | ILMN_218673   | Mus musculus dephospho-CoA kinase domain containing (Dcakd), mRNA.                                     | 1.09 | 1.90E-06 |
| 27407.00     | Abcf2         | ATP-binding cassette, sub-family F (GCN20), member 2                                                   | 1.09 | 0.00017  |
| 74111.00     | Rbm19         | RNA binding motif protein 19                                                                           | 1.08 | 0.00083  |
| 240334.00    | Pcyox1l       | prenylcysteine oxidase 1 like                                                                          | 1.08 | 5.00E-04 |
| 66164.00     | Nip7          | nuclear import 7 homolog (S. cerevisiae)                                                               | 1.08 | 2.30E-05 |
| 13849.00     | Ephx1         | epoxide hydrolase 1, microsomal                                                                        | 1.08 | 0.0055   |
| 13401.00     | Dmwd          | dystrophia myotonica-containing WD repeat motif                                                        | 1.08 | 1.40E-05 |
| 27407.00     | Abcf2         | ATP-binding cassette, sub-family F (GCN20), member 2                                                   | 1.08 | 0.00018  |
| 72155.00     | Cenpn         | centromere protein N                                                                                   | 1.08 | 1.10E-05 |
| 66976.00     | ILMN_212730   | Mus musculus RIKEN cDNA 2410002F23 gene (2410002F23Rik), mRNA.                                         | 1.08 | 0.00025  |
| 68971.00     | 1500001M20Rik | RIKEN cDNA 1500001M20 gene                                                                             | 1.08 | 0.00014  |
| 22146.00     | Tuba1c        | tubulin, alpha 1C                                                                                      | 1.07 | 0.00034  |
| 22021.00     | Tpst1         | protein-tyrosine sulfotransferase 1                                                                    | 1.07 | 7.90E-05 |
| 52033.00     | Pbk           | PDZ binding kinase                                                                                     | 1.07 | 6.10E-05 |

|              |               |                                                                                                                                      |      |          |
|--------------|---------------|--------------------------------------------------------------------------------------------------------------------------------------|------|----------|
| 26425.00     | Nubp1         | nucleotide binding protein 1                                                                                                         | 1.07 | 9.30E-06 |
| 17219.00     | Mcm6          | minichromosome maintenance deficient 6 (MIS5 homolog, <i>S. pombe</i> ) ( <i>S. cerevisiae</i> )                                     | 1.07 | 2.30E-06 |
| 100047856.00 | ILMN_208813   | PREDICTED: <i>Mus musculus</i> similar to calponin 3, acidic (LOC100047856), mRNA.                                                   | 1.07 | 0.00036  |
| 15510.00     | ILMN_213620   | <i>Mus musculus</i> heat shock protein 1 (chaperonin) (Hspd1), mRNA.                                                                 | 1.07 | 0.016    |
| 14859.00     | Gsta3         | glutathione S-transferase, alpha 3                                                                                                   | 1.07 | 0.0029   |
| 20624.00     | Eftud2        | elongation factor Tu GTP binding domain containing 2                                                                                 | 1.07 | 7.60E-06 |
| 50496.00     | ILMN_220573   | <i>Mus musculus</i> E2F transcription factor 6 (E2f6), mRNA.                                                                         | 1.07 | 2.50E-05 |
| 12387.00     | ILMN_211511   | <i>Mus musculus</i> catenin (cadherin associated protein), beta 1 (Ctnnb1), mRNA.                                                    | 1.07 | 0.0018   |
| 107373.00    | Fam111a       | family with sequence similarity 111, member A                                                                                        | 1.07 | 4.50E-06 |
| 27366.00     | Txn14a        | thioredoxin-like 4A                                                                                                                  | 1.06 | 2.80E-05 |
| 30056.00     | Timm9         | translocase of inner mitochondrial membrane 9 homolog (yeast)                                                                        | 1.06 | 7.10E-06 |
| 66628.00     | Thg1          | tRNA-histidine guanylyltransferase 1-like ( <i>S. cerevisiae</i> )                                                                   | 1.06 | 0.00015  |
| 11545.00     | Parp1         | poly (ADP-ribose) polymerase family, member 1                                                                                        | 1.06 | 9.60E-06 |
| 56488.00     | Nxt1          | NTF2-related export protein 1                                                                                                        | 1.06 | 1.10E-05 |
| 234865.00    | Nup133        | nucleoporin 133                                                                                                                      | 1.06 | 0.002    |
| 52683.00     | Ncaph2        | non-SMC condensin II complex, subunit H2                                                                                             | 1.06 | 6.50E-06 |
| 16206.00     | Lrig1         | leucine-rich repeats and immunoglobulin-like domains 1                                                                               | 1.06 | 4.20E-06 |
| 76113.00     | Lpo           | lactoperoxidase                                                                                                                      | 1.06 | 1.10E-05 |
| 16906.00     | ILMN_220293   | <i>Mus musculus</i> lamin B1 (Lmnb1), mRNA.                                                                                          | 1.06 | 4.00E-05 |
| 80876.00     | Ifitm2        | interferon induced transmembrane protein 2                                                                                           | 1.06 | 0.00076  |
| 66583.00     | Exosc1        | exosome component 1                                                                                                                  | 1.06 | 4.60E-05 |
| 67102.00     | D16Erd472e    | DNA segment, Chr 16, ERATO Doi 472, expressed                                                                                        | 1.06 | 0.0011   |
| 21771.00     | Cirh1a        | cirrhosis, autosomal recessive 1A (human)                                                                                            | 1.06 | 0.00013  |
| 67849.00     | Cdca5         | cell division cycle associated 5                                                                                                     | 1.06 | 0.00037  |
| 12462.00     | Cct3          | chaperonin containing Tcp1, subunit 3 (gamma)                                                                                        | 1.06 | 8.30E-05 |
| 27081.00     | Zfp275        | zinc finger protein 275                                                                                                              | 1.05 | 0.00027  |
| 71354.00     | Wdr31         | WD repeat domain 31                                                                                                                  | 1.05 | 4.00E-04 |
| 54141.00     | Spag5         | sperm associated antigen 5                                                                                                           | 1.05 | 6.50E-06 |
| 107686.00    | Snrpd2        | small nuclear ribonucleoprotein D2                                                                                                   | 1.05 | 3.50E-05 |
| 20587.00     | Smarb1        | SWI/SNF related, matrix associated, actin dependent regulator of chromatin, subfamily b, member 1                                    | 1.05 | 2.00E-04 |
| 55963.00     | Slc1a4        | solute carrier family 1 (glutamate/neutral amino acid transporter), member 4                                                         | 1.05 | 0.0015   |
| 28000.00     | Prpf19        | PRP19/PSO4 pre-mRNA processing factor 19 homolog ( <i>S. cerevisiae</i> )                                                            | 1.05 | 0.0012   |
| 28000.00     | Prpf19        | PRP19/PSO4 pre-mRNA processing factor 19 homolog ( <i>S. cerevisiae</i> )                                                            | 1.05 | 0.00015  |
| 67037.00     | Pmf1          | polyamine-modulated factor 1                                                                                                         | 1.05 | 4.20E-05 |
| 110109.00    | Nop2          | NOP2 nucleolar protein homolog (yeast)                                                                                               | 1.05 | 9.40E-05 |
| 17975.00     | Ncl           | nucleolin                                                                                                                            | 1.05 | 6.00E-05 |
| 108156.00    | Mthfd1        | methylenetetrahydrofolate dehydrogenase (NADP+ dependent), methylenetetrahydrofolate cyclohydrolase, formyltetrahydrofolate synthase | 1.05 | 0.00037  |
| 17535.00     | Mre11a        | meiotic recombination 11 homolog A ( <i>S. cerevisiae</i> )                                                                          | 1.05 | 1.80E-05 |
| 15191.00     | Hdgf          | hepatoma-derived growth factor                                                                                                       | 1.05 | 4.00E-05 |
| 232680.00    | Cpa2          | carboxypeptidase A2, pancreatic                                                                                                      | 1.05 | 6.00E-05 |
| 71963.00     | Cdca4         | cell division cycle associated 4                                                                                                     | 1.05 | 1.10E-05 |
| 71963.00     | Cdca4         | cell division cycle associated 4                                                                                                     | 1.05 | 5.80E-06 |
| 12443.00     | Cnd1          | cyclin D1                                                                                                                            | 1.05 | 0.00023  |
| 71735.00     | Lrwd1         | leucine-rich repeats and WD repeat domain containing 1                                                                               | 1.05 | 1.10E-05 |
| 15547.00     | Trmt2a        | TRM2 tRNA methyltransferase 2 homolog A ( <i>S. cerevisiae</i> )                                                                     | 1.04 | 6.20E-05 |
| 21681.00     | Thoc4         | THO complex 4                                                                                                                        | 1.04 | 2.30E-05 |
| 20425.00     | Shmt1         | serine hydroxymethyltransferase 1 (soluble)                                                                                          | 1.04 | 0.00085  |
| 19361.00     | Rad51         | RAD51 homolog ( <i>S. cerevisiae</i> )                                                                                               | 1.04 | 0.0061   |
| 18637.00     | Pfdn2         | prefoldin 2                                                                                                                          | 1.04 | 1.60E-05 |
| 52683.00     | Ncaph2        | non-SMC condensin II complex, subunit H2                                                                                             | 1.04 | 1.30E-05 |
| 66902.00     | Mtap          | methylthioadenosine phosphorylase                                                                                                    | 1.04 | 3.00E-04 |
| 224092.00    | Lsg1          | large subunit GTPase 1 homolog ( <i>S. cerevisiae</i> )                                                                              | 1.04 | 8.90E-06 |
| 192170.00    | Eif4a3        | eukaryotic translation initiation factor 4A3                                                                                         | 1.04 | 0.00039  |
| 74747.00     | Ddit4         | DNA-damage-inducible transcript 4                                                                                                    | 1.04 | 0.0011   |
| 12236.00     | Bub1b         | budding uninhibited by benzimidazoles 1 homolog, beta ( <i>S. cerevisiae</i> )                                                       | 1.04 | 0.00036  |
| 27078.00     | B9d1          | B9 protein domain 1                                                                                                                  | 1.04 | 5.10E-05 |
| 17025.00     | ILMN_215056   | <i>Mus musculus</i> aminolevulinate, delta-, dehydratase (Alad), mRNA.                                                               | 1.04 | 7.50E-05 |
| 217737.00    | Ahsa1         | AHA1, activator of heat shock protein ATPase homolog 1 (yeast)                                                                       | 1.04 | 6.80E-06 |
| 66976.00     | ILMN_212730   | <i>Mus musculus</i> RIKEN cDNA 2410002F23 gene (2410002F23Rik), mRNA.                                                                | 1.04 | 0.00045  |
| 68964.00     | 1500010J02Rik | RIKEN cDNA 1500010J02 gene                                                                                                           | 1.04 | 1.10E-06 |
| 57315.00     | Wdr46         | WD repeat domain 46                                                                                                                  | 1.03 | 0.00013  |
| 21926.00     | Tnf           | tumor necrosis factor                                                                                                                | 1.03 | 0.0064   |
| 30056.00     | Timm9         | translocase of inner mitochondrial membrane 9 homolog (yeast)                                                                        | 1.03 | 1.60E-05 |
| 116914.00    | Slc19a2       | solute carrier family 19 (thiamine transporter), member 2                                                                            | 1.03 | 0.0034   |
| 214791.00    | Sertad4       | SERTA domain containing 4                                                                                                            | 1.03 | 1.00E-04 |
| 68275.00     | Rpa1          | replication protein A1                                                                                                               | 1.03 | 3.00E-06 |
| 19227.00     | Pthlh         | parathyroid hormone-like peptide                                                                                                     | 1.03 | 6.60E-06 |
| 93737.00     | Pard6g        | par-6 partitioning defective 6 homolog gamma ( <i>C. elegans</i> )                                                                   | 1.03 | 2.10E-05 |

|              |               |                                                                                                                 |       |          |
|--------------|---------------|-----------------------------------------------------------------------------------------------------------------|-------|----------|
| 100609.00    | Nsun5         | NOL1/NOP2/Sun domain family, member 5                                                                           | 1.03  | 2.90E-05 |
| 56150.00     | Mad211        | MAD2 mitotic arrest deficient-like 1 (yeast)                                                                    | 1.03  | 1.70E-06 |
| 72500.00     | ILMN_225633   | Mus musculus immediate early response 5-like (Ier5l), mRNA.                                                     | 1.03  | 9.30E-06 |
| 319170.00    | Hist1h2an     | histone cluster 1, H2an                                                                                         | 1.03  | 0.012    |
| 276770.00    | Eif5a         | eukaryotic translation initiation factor 5A                                                                     | 1.03  | 4.00E-05 |
| 230917.00    | Tmem201       | transmembrane protein 201                                                                                       | 1.02  | 2.80E-05 |
| 66525.00     | Timm50        | translocase of inner mitochondrial membrane 50 homolog (yeast)                                                  | 1.02  | 2.00E-04 |
| 56403.00     | Syncrip       | synaptotagmin binding, cytoplasmic RNA interacting protein                                                      | 1.02  | 4.40E-05 |
| 66506.00     | Psmg3         | proteasome (prosome, macropain) assembly chaperone 3                                                            | 1.02  | 1.30E-05 |
| 20019.00     | Polr1a        | polymerase (RNA) I polypeptide A                                                                                | 1.02  | 4.90E-05 |
| 69912.00     | Nup43         | nucleoporin 43                                                                                                  | 1.02  | 4.50E-06 |
| 216443.00    | Mars          | methionine-tRNA synthetase                                                                                      | 1.02  | 0.00092  |
| 319169.00    | Hist1h2ak     | histone cluster 1, H2ak                                                                                         | 1.02  | 0.0081   |
| 107435.00    | Hat1          | histone aminotransferase 1                                                                                      | 1.02  | 2.60E-05 |
| 14297.00     | Fxn           | frataxin                                                                                                        | 1.02  | 2.80E-05 |
| 20624.00     | Eftud2        | elongation factor Tu GTP binding domain containing 2                                                            | 1.02  | 9.60E-06 |
| 228889.00    | Ddx27         | DEAD (Asp-Glu-Ala-Asp) box polypeptide 27                                                                       | 1.02  | 2.80E-05 |
| 108912.00    | Cdca2         | cell division cycle associated 2                                                                                | 1.02  | 7.90E-05 |
| 76813.00     | ILMN_230074   | Mus musculus armadillo repeat containing 6 (Armc6), mRNA.                                                       | 1.02  | 0.00014  |
| 11564.00     | Adsl          | adenylosuccinate lyase                                                                                          | 1.02  | 0.00012  |
| 72061.00     | 2010111I01Rik | RIKEN cDNA 2010111I01 gene                                                                                      | 1.02  | 1.20E-05 |
| 21877.00     | Tk1           | thymidine kinase 1                                                                                              | 1.01  | 0.0012   |
| 20621.00     | Snn           | stannin                                                                                                         | 1.01  | 0.0026   |
| 435684.00    | ILMN_245068   | Mus musculus Src homology 2 domain containing F (Shf), mRNA.                                                    | 1.01  | 0.0033   |
| 16912.00     | Psmb9         | proteasome (prosome, macropain) subunit, beta type 9 (large multifunctional peptidase 2)                        | 1.01  | 0.04     |
| 445007.00    | Nup85         | nucleoporin 85                                                                                                  | 1.01  | 0.0057   |
| 217011.00    | ILMN_239279   | Mus musculus notchless homolog 1 (Drosophila) (Nle1), mRNA.                                                     | 1.01  | 0.0017   |
| 66973.00     | ILMN_252778   | Mus musculus mitochondrial ribosomal protein S18B (Mrps18b), nuclear gene encoding mitochondrial protein, mRNA. | 1.01  | 0.00035  |
| 14793.00     | Cdca3         | cell division cycle associated 3                                                                                | 1.01  | 0.00055  |
| 215193.00    | Diexf         | digestive organ expansion factor homolog (zebrafish)                                                            | 1.01  | 5.50E-05 |
| 319278.00    | A230050P20Rik | RIKEN cDNA A230050P20 gene                                                                                      | 1.01  | 0.0013   |
| 66356.00     | 2310008H09Rik | RIKEN cDNA 2310008H09 gene                                                                                      | 1.01  | 6.60E-06 |
| 22793.00     | Zyx           | zyxin                                                                                                           | 1     | 0.0011   |
| 232187.00    | Smyd5         | SET and MYND domain containing 5                                                                                | 1     | 0.00095  |
| 19355.00     | Rad1          | RAD1 homolog (S. pombe)                                                                                         | 1     | 1.00E-04 |
| 214572.00    | Prmt7         | protein arginine N-methyltransferase 7                                                                          | 1     | 1.90E-05 |
| 68106.00     | Nt5c3l        | 5'-nucleotidase, cytosolic III-like                                                                             | 1     | 0.00013  |
| 16319.00     | Incenp        | inner centromere protein                                                                                        | 1     | 0.00032  |
| 55927.00     | Hes6          | hairy and enhancer of split 6 (Drosophila)                                                                      | 1     | 0.00015  |
| 29870.00     | Gtse1         | G two S phase expressed protein 1                                                                               | 1     | 0.002    |
| 67112.00     | Fgf22         | fibroblast growth factor 22                                                                                     | 1     | 0.00015  |
| 69524.00     | Esam          | endothelial cell-specific adhesion molecule                                                                     | 1     | 0.00018  |
| 27979.00     | Eif3b         | eukaryotic translation initiation factor 3, subunit B                                                           | 1     | 0.00026  |
| 381903.00    | Alg8          | asparagine-linked glycosylation 8 homolog (yeast, alpha-1,3-glucosyltransferase)                                | 1     | 0.00079  |
| 223921.00    | Aaas          | achalasia, adrenocortical insufficiency, alacrimia                                                              | 1     | 0.00036  |
| 277414.00    | Trp53i11      | transformation related protein 53 inducible protein 11                                                          | -1    | 0.00048  |
| 229731.00    | Slc25a24      | solute carrier family 25 (mitochondrial carrier, phosphate carrier), member 24                                  | -1    | 0.00054  |
| 67874.00     | Rprm          | reprimin, TP53 dependent G2 arrest mediator candidate                                                           | -1    | 0.00025  |
| 100047353.00 | ILMN_212740   | PREDICTED: Mus musculus similar to myocardial vascular inhibition factor (LOC100047353), mRNA.                  | -1    | 0.00029  |
| 100047173.00 | ILMN_214714   | PREDICTED: Mus musculus similar to synaptotagmin-like 1 (LOC100047173), misc RNA.                               | -1    | 1.60E-05 |
| 16196.00     | Il7           | interleukin 7                                                                                                   | -1    | 0.002    |
| 93842.00     | Igsf9         | immunoglobulin superfamily, member 9                                                                            | -1    | 0.0012   |
| 15484.00     | Hsd11b2       | hydroxysteroid 11-beta dehydrogenase 2                                                                          | -1    | 0.013    |
| 14674.00     | Gna13         | guanine nucleotide binding protein, alpha 13                                                                    | -1    | 0.0047   |
| 14367.00     | Fzd5          | frizzled homolog 5 (Drosophila)                                                                                 | -1    | 0.00015  |
| 105387.00    | Akr1c14       | aldo-keto reductase family 1, member C14                                                                        | -1    | 5.40E-05 |
| 11522.00     | Adh1          | alcohol dehydrogenase 1 (class I)                                                                               | -1    | 0.016    |
| 53330.00     | Vamp4         | vesicle-associated membrane protein 4                                                                           | -1.01 | 2.90E-05 |
| 223697.00    | Sun2          | Sad1 and UNC84 domain containing 2                                                                              | -1.01 | 0.0037   |
| 20482.00     | Skil          | SKI-like                                                                                                        | -1.01 | 0.0063   |
| 224860.00    | Plcl2         | phospholipase C-like 2                                                                                          | -1.01 | 1.90E-05 |
| 224938.00    | Pja2          | praja 2, RING-H2 motif containing                                                                               | -1.01 | 0.00017  |
| 102103.00    | Mtus1         | mitochondrial tumor suppressor 1                                                                                | -1.01 | 0.00014  |
| 64095.00     | Gpr35         | G protein-coupled receptor 35                                                                                   | -1.01 | 0.003    |
| 71946.00     | Endod1        | endonuclease domain containing 1                                                                                | -1.01 | 1.90E-05 |
| 171168.00    | Acer1         | alkaline ceramidase 1                                                                                           | -1.01 | 0.00046  |
| 208117.00    | Aph1b         | anterior pharynx defective 1b homolog (C. elegans)                                                              | -1.01 | 0.0053   |
| 66395.00     | Ahnak         | AHNAK nucleoprotein (desmoyokin)                                                                                | -1.01 | 0.00061  |



|              |               |                                                                                                                                             |       |          |
|--------------|---------------|---------------------------------------------------------------------------------------------------------------------------------------------|-------|----------|
| 18400.00     | Slc22a18      | solute carrier family 22 (organic cation transporter), member 18                                                                            | -1.02 | 1.10E-05 |
| 24057.00     | Sh3yl1        | Sh3 domain YSC-like 1                                                                                                                       | -1.02 | 1.50E-05 |
| 71601.00     | ILMN_213888   | Mus musculus CEA-related cell adhesion molecule 20 (Ceacam20), mRNA.                                                                        | -1.02 | 0.0049   |
| 11364.00     | Acadm         | acyl-Coenzyme A dehydrogenase, medium chain                                                                                                 | -1.02 | 1.30E-06 |
| 98267.00     | Stk17b        | serine/threonine kinase 17b (apoptosis-inducing)                                                                                            | -1.03 | 0.0011   |
| 216233.00    | Socs2         | suppressor of cytokine signaling 2                                                                                                          | -1.03 | 0.0015   |
| 69693.00     | Pof1b         | premature ovarian failure 1B                                                                                                                | -1.03 | 3.80E-05 |
| 217166.00    | Nr1d1         | nuclear receptor subfamily 1, group D, member 1                                                                                             | -1.03 | 0.0019   |
| 83965.00     | Enpp5         | ectonucleotide pyrophosphatase/phosphodiesterase 5                                                                                          | -1.03 | 3.80E-05 |
| 170752.00    | Bco2          | beta-carotene oxygenase 2                                                                                                                   | -1.03 | 0.0047   |
| 73910.00     | Arhgap18      | Rho GTPase activating protein 18                                                                                                            | -1.03 | 0.0011   |
| 11735.00     | Ank3          | ankyrin 3, epithelial                                                                                                                       | -1.03 | 0.0033   |
| 104776.00    | Aldh6a1       | aldehyde dehydrogenase family 6, subfamily A1                                                                                               | -1.03 | 0.0018   |
| 239559.00    | A4galt        | alpha 1,4-galactosyltransferase                                                                                                             | -1.03 | 2.40E-07 |
| 66753.00     | Erlec1        | endoplasmic reticulum lectin 1                                                                                                              | -1.03 | 3.00E-05 |
| 67171.00     | Dram2         | VDNA-damage regulated autophagy modulator 2                                                                                                 | -1.04 | 0.00019  |
| 56374.00     | Tmem59        | transmembrane protein 59                                                                                                                    | -1.04 | 0.00014  |
| 233724.00    | Tmem41b       | transmembrane protein 41B                                                                                                                   | -1.04 | 0.0011   |
| 20356.00     | Sema5a        | sema domain, seven thrombospondin repeats (type 1 and type 1-like), transmembrane domain (TM) and short cytoplasmic domain, (semaphorin) 5A | -1.04 | 0.0015   |
| 65970.00     | Lima1         | LIM domain and actin binding 1                                                                                                              | -1.04 | 0.0053   |
| 66809.00     | Krt20         | keratin 20                                                                                                                                  | -1.04 | 0.007    |
| 319190.00    | ILMN_213471   | Mus musculus histone cluster 2, H2be (Hist2h2be), mRNA.                                                                                     | -1.04 | 8.00E-04 |
| 74155.00     | Errfi1        | ERBB receptor feedback inhibitor 1                                                                                                          | -1.04 | 0.00035  |
| 66273.00     | 1810020D17Rik | RIKEN cDNA 1810020D17 gene                                                                                                                  | -1.04 | 0.00023  |
| 100727.00    | Ug2b34        | UDP glucuronosyltransferase 2 family, polypeptide B34                                                                                       | -1.05 | 0.0087   |
| 67043.00     | Syap1         | synapse associated protein 1                                                                                                                | -1.05 | 0.00011  |
| 217463.00    | Snx13         | sorting nexin 13                                                                                                                            | -1.05 | 0.0016   |
| 19885.00     | Rorc          | RAR-related orphan receptor gamma                                                                                                           | -1.05 | 0.018    |
| 245867.00    | Pcmd2         | protein-L-isoaspartate (D-aspartate) O-methyltransferase domain containing 2                                                                | -1.05 | 0.00071  |
| 26424.00     | Nr5a2         | nuclear receptor subfamily 5, group A, member 2                                                                                             | -1.05 | 0.00036  |
| 223646.00    | Naprt1        | nicotinate phosphoribosyltransferase domain containing 1                                                                                    | -1.05 | 0.0062   |
| 100046056.00 | ILMN_192265   | PREDICTED: Mus musculus similar to Pre-B-cell leukemia transcription factor interacting protein 1 (LOC100046056), mRNA.                     | -1.05 | 0.005    |
| 75686.00     | Nudt16        | nudix (nucleoside diphosphate linked moiety X)-type motif 16                                                                                | -1.05 | 0.00011  |
| 319186.00    | Hist1h2bm     | histone cluster 1, H2bm                                                                                                                     | -1.05 | 0.00016  |
| 13360.00     | Dhcr7         | 7-dehydrocholesterol reductase                                                                                                              | -1.05 | 0.0017   |
| 13063.00     | Cycs          | cytochrome c, somatic                                                                                                                       | -1.05 | 9.00E-05 |
| 66813.00     | ILMN_244180   | Mus musculus Bcl2-like 14 (apoptosis facilitator) (Bcl2l14), mRNA.                                                                          | -1.05 | 0.0016   |
| 223631.00    | ILMN_209571   | Mus musculus cDNA sequence BC025446 (BC025446), mRNA.                                                                                       | -1.05 | 0.0056   |
| 17940.00     | Naip1         | NLR family, apoptosis inhibitory protein 1                                                                                                  | -1.06 | 0.0013   |
| 100047937.00 | ILMN_219033   | PREDICTED: Mus musculus similar to Aldehyde dehydrogenase 1 family, member L1 (LOC100047937), mRNA.                                         | -1.06 | 4.60E-05 |
| 13105.00     | Cyp2d9        | cytochrome P450, family 2, subfamily d, polypeptide 9                                                                                       | -1.06 | 0.0092   |
| 104086.00    | Cyp27a1       | cytochrome P450, family 27, subfamily a, polypeptide 1                                                                                      | -1.06 | 0.0034   |
| 83429.00     | Ctns          | cystinosis, nephropathic                                                                                                                    | -1.06 | 0.00056  |
| 71908.00     | Cldn23        | claudin 23                                                                                                                                  | -1.06 | 4.20E-05 |
| 12724.00     | Clcn2         | chloride channel 2                                                                                                                          | -1.06 | 1.00E-05 |
| 107747.00    | ILMN_219033   | Mus musculus aldehyde dehydrogenase 1 family, member L1 (Aldh1l1), mRNA.                                                                    | -1.06 | 0.00011  |
| 66753.00     | Erlec1        | endoplasmic reticulum lectin 1                                                                                                              | -1.06 | 9.60E-06 |
| 94224.00     | Srd5a2        | steroid 5 alpha-reductase 2                                                                                                                 | -1.07 | 1.40E-05 |
| 329416.00    | Nostrin       | nitric oxide synthase trafficker                                                                                                            | -1.07 | 0.00092  |
| 17961.00     | Nat2          | N-acetyltransferase 2 (arylamine N-acetyltransferase)                                                                                       | -1.07 | 0.00029  |
| 99663.00     | Clca6         | chloride channel calcium activated 6                                                                                                        | -1.07 | 0.025    |
| 26365.00     | Ceacam1       | carcinoembryonic antigen-related cell adhesion molecule 1                                                                                   | -1.07 | 0.02     |
| 353170.00    | ILMN_247686   | Mus musculus RIKEN cDNA 4932441K18 gene (4932441K18Rik), mRNA.                                                                              | -1.07 | 4.20E-05 |
| 22248.00     | Unc119        | unc-119 homolog (C. elegans)                                                                                                                | -1.08 | 8.90E-06 |
| 54683.00     | Prdx5         | peroxiredoxin 5                                                                                                                             | -1.08 | 0.00049  |
| 67801.00     | Plp           | plasma membrane proteolipid                                                                                                                 | -1.08 | 0.0035   |
| 226971.00    | Pleckhb2      | pleckstrin homology domain containing, family B (evectins) member 2                                                                         | -1.08 | 2.30E-05 |
| 54484.00     | Mkrm1         | makorin, ring finger protein, 1                                                                                                             | -1.08 | 0.00095  |
| 100046781.00 | ILMN_220554   | PREDICTED: Mus musculus similar to carboxypeptidase D (LOC100046781), mRNA.                                                                 | -1.08 | 0.014    |
| 85308.00     | Fam158a       | family with sequence similarity 158, member A                                                                                               | -1.08 | 0.0011   |
| 13511.00     | Dsg2          | desmoglein 2                                                                                                                                | -1.08 | 0.00029  |
| 68778.00     | 1110038D17Rik | RIKEN cDNA 1110038D17 gene                                                                                                                  | -1.08 | 6.30E-07 |
| 225997.00    | Trpm6         | transient receptor potential cation channel, subfamily M, member 6                                                                          | -1.09 | 0.00014  |
| 72948.00     | Tppp          | tubulin polymerization promoting protein                                                                                                    | -1.09 | 3.50E-05 |
| 19241.00     | ILMN_196070   | Mus musculus thymosin, beta 4, X chromosome (Tmsb4x), mRNA.                                                                                 | -1.09 | 1.70E-05 |
| 20866.00     | ILMN_221367   | Mus musculus stromal interaction molecule 1 (Stim1), mRNA.                                                                                  | -1.09 | 2.50E-06 |
| 102693.00    | Phldb1        | pleckstrin homology-like domain, family B, member 1                                                                                         | -1.09 | 0.0019   |
| 18627.00     | Per2          | period homolog 2 (Drosophila)                                                                                                               | -1.09 | 0.0027   |

|              |               |                                                                                                                                 |       |          |
|--------------|---------------|---------------------------------------------------------------------------------------------------------------------------------|-------|----------|
| 54405.00     | Ndufa1        | NADH dehydrogenase (ubiquinone) 1 alpha subcomplex, 1                                                                           | -1.09 | 0.00016  |
| 105559.00    | Mbnl2         | muscleblind-like 2                                                                                                              | -1.09 | 4.40E-05 |
| 100048721.00 | ILMN_210479   | PREDICTED: Mus musculus similar to fibronectin leucine rich transmembrane protein 3, transcript variant 1 (LOC100048721), mRNA. | -1.09 | 0.00074  |
| 57890.00     | Il17re        | interleukin 17 receptor E                                                                                                       | -1.09 | 0.0014   |
| 212070.00    | Clrn3         | clarin 3                                                                                                                        | -1.09 | 4.00E-04 |
| 76960.00     | Bcas1         | breast carcinoma amplified sequence 1                                                                                           | -1.09 | 2.80E-05 |
| 21934.00     | Tnfrsf11a     | tumor necrosis factor receptor superfamily, member 11a                                                                          | -1.1  | 1.70E-05 |
| 21416.00     | Tcf7l2        | transcription factor 7-like 2, T-cell specific, HMG-box                                                                         | -1.1  | 1.50E-05 |
| 54381.00     | Pgcp          | plasma glutamate carboxypeptidase                                                                                               | -1.1  | 0.0011   |
| 170761.00    | Pdzd3         | PDZ domain containing 3                                                                                                         | -1.1  | 0.0026   |
| 18003.00     | Nedd9         | neural precursor cell expressed, developmentally down-regulated gene 9                                                          | -1.1  | 0.00059  |
| 26931.00     | Ppp2r5c       | protein phosphatase 2, regulatory subunit B (B56), gamma isoform                                                                | -1.1  | 0.00012  |
| 83379.00     | Klb           | klotho beta                                                                                                                     | -1.1  | 2.60E-06 |
| 68024.00     | Hist1h2bc     | histone cluster 1, H2bc                                                                                                         | -1.1  | 0.00092  |
| 23882.00     | Gadd45g       | growth arrest and DNA-damage-inducible 45 gamma                                                                                 | -1.1  | 0.0017   |
| 11732.00     | Ank           | progressive ankylosis                                                                                                           | -1.1  | 0.00037  |
| 107652.00    | Uap1          | UDP-N-acetylglucosamine pyrophosphorylase 1                                                                                     | -1.11 | 0.002    |
| 11891.00     | Rab27a        | RAB27A, member RAS oncogene family                                                                                              | -1.11 | 6.60E-06 |
| 213522.00    | Plekhg6       | pleckstrin homology domain containing, family G (with RhoGef domain) member 6                                                   | -1.11 | 0.00082  |
| 53880.00     | ILMN_230036   | Mus musculus NLR family, apoptosis inhibitory protein 7 (Naip7), mRNA.                                                          | -1.11 | 0.00011  |
| 16664.00     | Krt14         | keratin 14                                                                                                                      | -1.11 | 0.013    |
| 102871.00    | D330045A20Rik | RIKEN cDNA D330045A20 gene                                                                                                      | -1.11 | 0.00035  |
| 75415.00     | Arhgap12      | Rho GTPase activating protein 12                                                                                                | -1.11 | 5.10E-05 |
| 71874.00     | 2310007B03Rik | RIKEN cDNA 2310007B03 gene                                                                                                      | -1.11 | 2.00E-04 |
| 20394.00     | Scg5          | secretogranin V                                                                                                                 | -1.12 | 6.10E-05 |
| 11852.00     | Rhob          | ras homolog gene family, member B                                                                                               | -1.12 | 0.00047  |
| 18858.00     | Pmp22         | peripheral myelin protein 22                                                                                                    | -1.12 | 0.012    |
| 71801.00     | Plekhf2       | pleckstrin homology domain containing, family F (with FYVE domain) member 2                                                     | -1.12 | 0.0097   |
| 13139.00     | Dgka          | diacylglycerol kinase, alpha                                                                                                    | -1.12 | 8.70E-05 |
| 23971.00     | Papss1        | 3'-phosphoadenosine 5'-phosphosulfate synthase 1                                                                                | -1.13 | 1.70E-06 |
| 107589.00    | Mylk          | myosin, light polypeptide kinase                                                                                                | -1.13 | 0.0029   |
| 100044862.00 | ILMN_221289   | PREDICTED: Mus musculus similar to Fbx13 protein (LOC100044862), mRNA.                                                          | -1.13 | 0.00035  |
| 16478.00     | Jund          | Jun proto-oncogene related gene d                                                                                               | -1.13 | 0.0026   |
| 57890.00     | Il17re        | interleukin 17 receptor E                                                                                                       | -1.13 | 3.80E-05 |
| 66822.00     | Fbxo25        | F-box protein 25                                                                                                                | -1.13 | 3.00E-04 |
| 13139.00     | Dgka          | diacylglycerol kinase, alpha                                                                                                    | -1.13 | 2.30E-05 |
| 67095.00     | Trak1         | trafficking protein, kinesin binding 1                                                                                          | -1.14 | 1.10E-05 |
| 22134.00     | Tgoln1        | trans-golgi network protein                                                                                                     | -1.14 | 3.10E-05 |
| 50776.00     | Polg2         | polymerase (DNA directed), gamma 2, accessory subunit                                                                           | -1.14 | 0.00019  |
| 223646.00    | Naprt1        | nicotinate phosphoribosyltransferase domain containing 1                                                                        | -1.14 | 0.00012  |
| 14063.00     | F2r1l         | coagulation factor II (thrombin) receptor-like 1                                                                                | -1.14 | 0.0016   |
| 212483.00    | Fam193b       | family with sequence similarity 193, member B                                                                                   | -1.14 | 0.00019  |
| 56643.00     | Slc15a1       | solute carrier family 15 (oligopeptide transporter), member 1                                                                   | -1.15 | 0.02     |
| 66824.00     | ILMN_223398   | Mus musculus PYD and CARD domain containing (Pycard), mRNA.                                                                     | -1.15 | 0.00014  |
| 59030.00     | Mkks          | McKusick-Kaufman syndrome protein                                                                                               | -1.15 | 1.80E-06 |
| 16168.00     | Il15          | interleukin 15                                                                                                                  | -1.15 | 2.30E-05 |
| 384009.00    | Glipr2        | GLI pathogenesis-related 2                                                                                                      | -1.15 | 0.0033   |
| 380711.00    | Rap1gap2      | RAP1 GTPase activating protein 2                                                                                                | -1.15 | 3.00E-06 |
| 74754.00     | Dhcr24        | 24-dehydrocholesterol reductase                                                                                                 | -1.15 | 0.0017   |
| 66298.00     | Defa21        | defensin, alpha, 21                                                                                                             | -1.15 | 0.019    |
| 12457.00     | ILMN_208982   | Mus musculus CCR4 carbon catabolite repression 4-like (S. cerevisiae) (Ccrn4l), mRNA.                                           | -1.15 | 0.0029   |
| 66264.00     | Ccdc28b       | coiled coil domain containing 28B                                                                                               | -1.15 | 0.00041  |
| 76527.00     | Il34          | interleukin 34                                                                                                                  | -1.15 | 7.90E-07 |
| 109637.00    | Upk1a         | uroplakin 1A                                                                                                                    | -1.16 | 7.30E-05 |
| 209760.00    | Tmc7          | transmembrane channel-like gene family 7                                                                                        | -1.16 | 0.00082  |
| 20755.00     | ILMN_215269   | Mus musculus small proline-rich protein 2A (Sprr2a), mRNA.                                                                      | -1.16 | 5.30E-06 |
| 72002.00     | Slc39a5       | solute carrier family 39 (metal ion transporter), member 5                                                                      | -1.16 | 4.00E-05 |
| 108079.00    | Prkaa2        | protein kinase, AMP-activated, alpha 2 catalytic subunit                                                                        | -1.16 | 6.20E-05 |
| 23954.00     | Nek3          | NIMA (never in mitosis gene a)-related expressed kinase 3                                                                       | -1.16 | 1.30E-05 |
| 228576.00    | Mall          | mal, T-cell differentiation protein-like                                                                                        | -1.16 | 0.0011   |
| 20216.00     | Acsm3         | acyl-CoA synthetase medium-chain family member 3                                                                                | -1.16 | 2.60E-05 |
| 53376.00     | Usp2          | ubiquitin specific peptidase 2                                                                                                  | -1.17 | 0.00018  |
| 14605.00     | Tsc22d3       | TSC22 domain family, member 3                                                                                                   | -1.17 | 0.00019  |
| 64177.00     | Trpv6         | transient receptor potential cation channel, subfamily V, member 6                                                              | -1.17 | 0.0016   |
| 170756.00    | ILMN_214023   | Mus musculus solute carrier family 24 (sodium/potassium/calcium exchanger), member 6 (Slc24a6), mRNA.                           | -1.17 | 0.00078  |
| 76108.00     | Rap2a         | RAS related protein 2a                                                                                                          | -1.17 | 0.00029  |
| 76787.00     | Ppfia3        | protein tyrosine phosphatase, receptor type, f polypeptide (PTPRF), interacting protein (liprin), alpha 3                       | -1.17 | 0.00095  |
| 17190.00     | Mbd1          | methyl-CpG binding domain protein 1                                                                                             | -1.17 | 1.60E-05 |

|           |               |                                                                                                                              |       |          |
|-----------|---------------|------------------------------------------------------------------------------------------------------------------------------|-------|----------|
| 212307.00 | Mapre2        | microtubule-associated protein, RP/EB family, member 2                                                                       | -1.17 | 1.60E-05 |
| 56486.00  | Gabarap       | gamma-aminobutyric acid receptor associated protein                                                                          | -1.17 | 4.90E-06 |
| 245038.00 | Dclk3         | doublecortin-like kinase 3                                                                                                   | -1.17 | 4.60E-05 |
| 12653.00  | Chgb          | chromogranin B                                                                                                               | -1.17 | 2.30E-05 |
| 110595.00 | Timp4         | tissue inhibitor of metalloproteinase 4                                                                                      | -1.18 | 3.50E-05 |
| 72002.00  | Slc39a5       | solute carrier family 39 (metal ion transporter), member 5                                                                   | -1.18 | 0.002    |
| 67709.00  | Reg4          | regenerating islet-derived family, member 4                                                                                  | -1.18 | 0.002    |
| 71664.00  | Mettl7b       | methyltransferase like 7B                                                                                                    | -1.18 | 0.002    |
| 16529.00  | Kcnk5         | potassium channel, subfamily K, member 5                                                                                     | -1.18 | 6.20E-05 |
| 77996.00  | D730039F16Rik | RIKEN cDNA D730039F16 gene                                                                                                   | -1.18 | 5.00E-04 |
| 269336.00 | Ccdc32        | coiled-coil domain containing 32                                                                                             | -1.18 | 5.60E-07 |
| 20730.00  | Spink3        | serine peptidase inhibitor, Kazal type 3                                                                                     | -1.19 | 0.0053   |
| 18799.00  | Plcd1         | phospholipase C, delta 1                                                                                                     | -1.19 | 0.00014  |
| 16601.00  | Klf9          | Kruppel-like factor 9                                                                                                        | -1.19 | 0.0037   |
| 16598.00  | Klf2          | Kruppel-like factor 2 (lung)                                                                                                 | -1.19 | 0.0076   |
| 69718.00  | Ipmk          | inositol polyphosphate multikinase                                                                                           | -1.19 | 4.90E-06 |
| 380921.00 | Dgkh          | diacylglycerol kinase, eta                                                                                                   | -1.19 | 3.60E-07 |
| 12684.00  | Cideb         | cell death-inducing DNA fragmentation factor, alpha subunit-like effector B                                                  | -1.19 | 0.00016  |
| 67064.00  | Chmp1b        | chromatin modifying protein 1B                                                                                               | -1.19 | 8.30E-05 |
| 381175.00 | Ccdc68        | coiled-coil domain containing 68                                                                                             | -1.19 | 0.0029   |
| 12226.00  | ILMN_212740   | Mus musculus B-cell translocation gene 1, anti-proliferative (Btg1), mRNA.                                                   | -1.19 | 1.00E-05 |
| 72361.00  | ILMN_219691   | Mus musculus RIKEN cDNA 2210023G05 gene (2210023G05Rik), mRNA.                                                               | -1.19 | 6.70E-05 |
| 21807.00  | Tsc22d1       | TSC22 domain family, member 1                                                                                                | -1.2  | 0.00034  |
| 18753.00  | Prkcd         | protein kinase C, delta                                                                                                      | -1.2  | 4.40E-07 |
| 228983.00 | Osbpl2        | oxysterol binding protein-like 2                                                                                             | -1.2  | 9.20E-08 |
| 668837.00 | ILMN_207496   | PREDICTED: Mus musculus similar to ATP synthase, H+ transporting, mitochondrial F0 complex, subunit G (LOC668837), misc RNA. | -1.2  | 0.00047  |
| 15212.00  | Hexb          | hexosaminidase B                                                                                                             | -1.2  | 0.00041  |
| 223706.00 | Cyp2d34       | cytochrome P450, family 2, subfamily d, polypeptide 34                                                                       | -1.2  | 0.0013   |
| 12452.00  | Ccng2         | cyclin G2                                                                                                                    | -1.2  | 0.0033   |
| 223631.00 | ILMN_209571   | Mus musculus cDNA sequence BC025446 (BC025446), mRNA.                                                                        | -1.2  | 0.00046  |
| 19123.00  | Proc          | protein C                                                                                                                    | -1.21 | 0.00017  |
| 260409.00 | Cdc42ep3      | CDC42 effector protein (Rho GTPase binding) 3                                                                                | -1.21 | 0.0025   |
| 69787.00  | Anxa13        | annexin A13                                                                                                                  | -1.21 | 0.0049   |
| 27360.00  | Add3          | adducin 3 (gamma)                                                                                                            | -1.21 | 4.20E-05 |
| 107723.00 | Slc12a6       | solute carrier family 12, member 6                                                                                           | -1.22 | 7.60E-06 |
| 223646.00 | Naprt1        | nicotinate phosphoribosyltransferase domain containing 1                                                                     | -1.22 | 0.00011  |
| 239217.00 | Kctd12        | potassium channel tetramerisation domain containing 12                                                                       | -1.22 | 1.90E-05 |
| 16168.00  | Il15          | interleukin 15                                                                                                               | -1.22 | 0.00022  |
| 53897.00  | Gal3st1       | galactose-3-O-sulfotransferase 1                                                                                             | -1.22 | 0.00015  |
| 78252.00  | Fam55b        | family with sequence similarity 55, member B                                                                                 | -1.22 | 0.0047   |
| 20443.00  | St3gal4       | ST3 beta-galactoside alpha-2,3-sialyltransferase 4                                                                           | -1.23 | 0.0012   |
| 18574.00  | Pde1b         | phosphodiesterase 1B, Ca2+-calmodulin dependent                                                                              | -1.23 | 0.00012  |
| 105559.00 | Mbnl2         | muscleblind-like 2                                                                                                           | -1.23 | 1.80E-05 |
| 12409.00  | Cbr2          | carbonyl reductase 2                                                                                                         | -1.23 | 0.00047  |
| 12351.00  | Car4          | carbonic anhydrase 4                                                                                                         | -1.23 | 0.0012   |
| 230163.00 | Aldob         | aldolase B, fructose-bisphosphate                                                                                            | -1.23 | 0.003    |
| 238330.00 | ILMN_230817   | Mus musculus RIKEN cDNA 6430527G18 gene (6430527G18Rik), mRNA.                                                               | -1.23 | 0.00018  |
| 67198.00  | Spats2l       | spermatogenesis associated, serine-rich 2-like                                                                               | -1.23 | 0.00068  |
| 52357.00  | Wwc2          | WW, C2 and coiled-coil domain containing 2                                                                                   | -1.24 | 0.00049  |
| 11853.00  | Rhoc          | ras homolog gene family, member C                                                                                            | -1.24 | 0.00011  |
| 109731.00 | Maob          | monoamine oxidase B                                                                                                          | -1.24 | 0.002    |
| 20238.00  | Atxn1         | ataxin 1                                                                                                                     | -1.24 | 5.80E-05 |
| 70113.00  | Odf3b         | outer dense fiber of sperm tails 3B                                                                                          | -1.24 | 4.70E-06 |
| 16581.00  | Kifc2         | kinesin family member C2                                                                                                     | -1.25 | 1.40E-05 |
| 382571.00 | ILMN_188365   | Mus musculus potassium voltage-gated channel, subfamily F, member 1 (Kcnf1), mRNA.                                           | -1.25 | 0.00073  |
| 93692.00  | Glrx          | glutaredoxin                                                                                                                 | -1.25 | 1.30E-05 |
| 13819.00  | Epas1         | endothelial PAS domain protein 1                                                                                             | -1.25 | 8.00E-06 |
| 13040.00  | Ctss          | cathepsin S                                                                                                                  | -1.25 | 0.0017   |
| 53422.00  | ILMN_196190   | Mus musculus Y box protein 2 (Ybx2), mRNA.                                                                                   | -1.26 | 9.60E-05 |
| 76273.00  | Ndfip2        | Nedd4 family interacting protein 2                                                                                           | -1.26 | 3.10E-05 |
| 212307.00 | Mapre2        | microtubule-associated protein, RP/EB family, member 2                                                                       | -1.26 | 8.80E-07 |
| 16529.00  | Kcnk5         | potassium channel, subfamily K, member 5                                                                                     | -1.26 | 1.10E-05 |
| 14915.00  | Guca2a        | guanylate cyclase activator 2a (guanylin)                                                                                    | -1.26 | 3.80E-06 |
| 14281.00  | Fos           | FBJ osteosarcoma oncogene                                                                                                    | -1.26 | 0.00018  |
| 68636.00  | Fahd1         | fumarylacetoacetate hydrolase domain containing 1                                                                            | -1.26 | 6.10E-05 |
| 212862.00 | ILMN_218521   | Mus musculus choline phosphotransferase 1 (Chpt1), mRNA.                                                                     | -1.26 | 4.20E-05 |
| 20276.00  | Scnn1a        | sodium channel, nonvoltage-gated 1 alpha                                                                                     | -1.27 | 8.50E-06 |
| 11758.00  | ILMN_210596   | Mus musculus peroxiredoxin 6 (Prdx6), mRNA.                                                                                  | -1.27 | 9.30E-06 |

|           |               |                                                                                              |       |          |
|-----------|---------------|----------------------------------------------------------------------------------------------|-------|----------|
| 23954.00  | Nek3          | NIMA (never in mitosis gene a)-related expressed kinase 3                                    | -1.27 | 1.50E-06 |
| 16432.00  | Itm2b         | integral membrane protein 2B                                                                 | -1.27 | 0.00054  |
| 27360.00  | Add3          | adducin 3 (gamma)                                                                            | -1.27 | 6.10E-05 |
| 67038.00  | 2010109I03Rik | RIKEN cDNA 2010109I03 gene                                                                   | -1.27 | 0.032    |
| 70113.00  | Odf3b         | outer dense fiber of sperm tails 3B                                                          | -1.27 | 0.00011  |
| 69864.00  | 1810065E05Rik | RIKEN cDNA 1810065E05 gene                                                                   | -1.27 | 0.0056   |
| 232078.00 | Thnsl2        | threonine synthase-like 2 (bacterial)                                                        | -1.28 | 6.50E-07 |
| 21415.00  | Tcf7l1        | transcription factor 7-like 1 (T-cell specific, HMG box)                                     | -1.28 | 0.0027   |
| 14102.00  | Fas           | Fas (TNF receptor superfamily member 6)                                                      | -1.28 | 0.00014  |
| 241041.00 | Gm4956        | predicted gene 4956                                                                          | -1.28 | 1.10E-05 |
| 70031.00  | Cmtm8         | CKLF-like MARVEL transmembrane domain containing 8                                           | -1.28 | 4.50E-06 |
| 381122.00 | Capn13        | calpain 13                                                                                   | -1.28 | 0.0045   |
| 12945.00  | Dmbt1         | deleted in malignant brain tumors 1                                                          | -1.29 | 0.0051   |
| 75568.00  | Capsl         | calcyphosine-like                                                                            | -1.29 | 1.50E-06 |
| 74340.00  | Ahcy12        | S-adenosylhomocysteine hydrolase-like 2                                                      | -1.29 | 0.00011  |
| 17965.00  | Nbl1          | neuroblastoma, suppression of tumorigenicity 1                                               | -1.3  | 3.50E-05 |
| 14132.00  | Fcgrt         | Fc receptor, IgG, alpha chain transporter                                                    | -1.3  | 1.00E-04 |
| 13821.00  | Epb4.111      | erythrocyte protein band 4.1-like 1                                                          | -1.3  | 4.90E-05 |
| 20515.00  | Slc20a1       | solute carrier family 20, member 1                                                           | -1.31 | 1.00E-04 |
| 18703.00  | Pigr          | polymeric immunoglobulin receptor                                                            | -1.31 | 0.00073  |
| 554292.00 | ILMN_238123   | Mus musculus UbiE-YGHL1 fusion protein (LOC554292), mRNA.                                    | -1.31 | 1.60E-05 |
| 209378.00 | Itih5         | inter-alpha (globulin) inhibitor H5                                                          | -1.31 | 1.20E-05 |
| 66270.00  | Fam134b       | family with sequence similarity 134, member B                                                | -1.31 | 0.00018  |
| 73102.00  | Slc22a23      | solute carrier family 22, member 23                                                          | -1.31 | 4.30E-07 |
| 23971.00  | Papss1        | 3'-phosphoadenosine 5'-phosphosulfate synthase 1                                             | -1.32 | 1.50E-06 |
| 99031.00  | Osbpl6        | oxysterol binding protein-like 6                                                             | -1.32 | 2.70E-06 |
| 384061.00 | ILMN_244553   | Mus musculus fibronectin type III domain containing 5 (Fn3c5), mRNA.                         | -1.32 | 1.60E-06 |
| 109901.00 | Cela1         | chymotrypsin-like elastase family, member 1                                                  | -1.32 | 0.0022   |
| 12864.00  | Cox6c         | cytochrome c oxidase, subunit VIc                                                            | -1.32 | 0.0055   |
| 76959.00  | Chmp5         | chromatin modifying protein 5                                                                | -1.32 | 6.50E-06 |
| 67171.00  | ILMN_257311   | Mus musculus transmembrane protein 77 (Tmem77), transcript variant 2, mRNA.                  | -1.33 | 4.70E-06 |
| 108682.00 | Gpt2          | glutamic pyruvate transaminase (alanine aminotransferase) 2                                  | -1.33 | 0.00044  |
| 338521.00 | Fa2h          | fatty acid 2-hydroxylase                                                                     | -1.33 | 5.00E-04 |
| 626708.00 | Defa26        | defensin, alpha, 26                                                                          | -1.33 | 0.00045  |
| 71900.00  | Tmem106b      | transmembrane protein 106B                                                                   | -1.33 | 5.50E-05 |
| 66938.00  | 1700029G01Rik | RIKEN cDNA 1700029G01 gene                                                                   | -1.33 | 4.60E-05 |
| 19775.00  | ILMN_195778   | Mus musculus xenotropic and polytropic retrovirus receptor 1 (Xpr1), mRNA.                   | -1.34 | 8.00E-06 |
| 17289.00  | Merk          | c-mer proto-oncogene tyrosine kinase                                                         | -1.34 | 0.00081  |
| 12457.00  | ILMN_208982   | Mus musculus CCR4 carbon catabolite repression 4-like (S. cerevisiae) (Ccrn4), mRNA.         | -1.34 | 0.00036  |
| 52466.00  | ILMN_213036   | Mus musculus solute carrier family 46, member 1 (Slc46a1), mRNA.                             | -1.35 | 0.0015   |
| 94249.00  | Slc24a3       | solute carrier family 24 (sodium/potassium/calcium exchanger), member 3                      | -1.35 | 1.50E-05 |
| 18569.00  | Pdcd4         | programmed cell death 4                                                                      | -1.35 | 0.00011  |
| 26384.00  | ILMN_226523   | Mus musculus glucosamine-6-phosphate deaminase 1 (Gnpda1), mRNA.                             | -1.35 | 8.30E-05 |
| 67731.00  | Fbxo32        | F-box protein 32                                                                             | -1.35 | 4.40E-05 |
| 13240.00  | Defa6         | defensin, alpha, 6                                                                           | -1.35 | 0.0042   |
| 244853.00 | Fam55d        | family with sequence similarity 55, member D                                                 | -1.35 | 0.0056   |
| 227929.00 | Cytip         | cytohesin 1 interacting protein                                                              | -1.35 | 8.90E-06 |
| 232078.00 | Thnsl2        | threonine synthase-like 2 (bacterial)                                                        | -1.36 | 1.50E-06 |
| 15567.00  | Slc6a4        | solute carrier family 6 (neurotransmitter transporter, serotonin), member 4                  | -1.36 | 2.70E-05 |
| 18175.00  | Nrap          | nebulin-related anchoring protein                                                            | -1.36 | 7.90E-05 |
| 77996.00  | D730039F16Rik | RIKEN cDNA D730039F16 gene                                                                   | -1.36 | 1.80E-05 |
| 13101.00  | Cyp2d10       | cytochrome P450, family 2, subfamily d, polypeptide 10                                       | -1.36 | 0.00045  |
| 13479.00  | Dpep1         | dipeptidase 1 (renal)                                                                        | -1.37 | 0.0035   |
| 12700.00  | Cish          | cytokine inducible SH2-containing protein                                                    | -1.37 | 1.80E-05 |
| 212862.00 | ILMN_218521   | Mus musculus choline phosphotransferase 1 (Chpt1), mRNA.                                     | -1.37 | 8.70E-05 |
| 58210.00  | Sectm1b       | secreted and transmembrane 1B                                                                | -1.38 | 0.0041   |
| 20196.00  | S100a13       | S100 calcium binding protein A13                                                             | -1.38 | 6.00E-05 |
| 243725.00 | Ppp1r9a       | protein phosphatase 1, regulatory (inhibitor) subunit 9A                                     | -1.38 | 4.50E-06 |
| 68009.00  | ILMN_196346   | Mus musculus defensin related cryptdin 20 (Defcr20), mRNA.                                   | -1.38 | 0.00065  |
| 66610.00  | Abi3          | ABI gene family, member 3                                                                    | -1.38 | 0.00047  |
| 381204.00 | Naalad11      | N-acetylated alpha-linked acidic dipeptidase-like 1                                          | -1.39 | 0.0076   |
| 109218.00 | Tmem139       | transmembrane protein 139                                                                    | -1.4  | 4.00E-05 |
| 50708.00  | Hist1h1c      | histone cluster 1, H1c                                                                       | -1.4  | 5.50E-05 |
| 108112.00 | ILMN_218862   | Mus musculus eukaryotic translation initiation factor 4E binding protein 3 (Eif4ebp3), mRNA. | -1.4  | 9.40E-05 |
| 56318.00  | ILMN_218213   | Mus musculus acid phosphatase, prostate (Acpp), transcript variant 1, mRNA.                  | -1.4  | 1.70E-06 |
| 76507.00  | Abp1          | amiloride binding protein 1 (amine oxidase, copper-containing)                               | -1.4  | 6.10E-05 |
| 234797.00 | 6430548M08Rik | RIKEN cDNA 6430548M08 gene                                                                   | -1.4  | 0.00084  |
| 20208.00  | Saa1          | serum amyloid A 1                                                                            | -1.41 | 0.0069   |

|              |               |                                                                                                                              |       |          |
|--------------|---------------|------------------------------------------------------------------------------------------------------------------------------|-------|----------|
| 76051.00     | ILMN_221992   | Mus musculus glucosidase, alpha; neutral C (Ganc), mRNA.                                                                     | -1.41 | 0.00022  |
| 11676.00     | Aldoc         | aldolase C, fructose-bisphosphate                                                                                            | -1.41 | 9.90E-07 |
| 207819.00    | ILMN_212940   | Mus musculus RIKEN cDNA 4930539E08 gene (4930539E08Rik), mRNA.                                                               | -1.41 | 0.00013  |
| 66222.00     | Serp1b1a      | serine (or cysteine) peptidase inhibitor, clade B, member 1a                                                                 | -1.42 | 4.20E-05 |
| 26395.00     | Map2k1        | mitogen-activated protein kinase kinase 1                                                                                    | -1.42 | 0.00086  |
| 70261.00     | 2010110P09Rik | RIKEN cDNA 2010110P09 gene                                                                                                   | -1.42 | 0.00049  |
| 102857.00    | Slc6a8        | solute carrier family 6 (neurotransmitter transporter, creatine), member 8                                                   | -1.43 | 0.00048  |
| 71207.00     | ILMN_212961   | Mus musculus nudix (nucleoside diphosphate linked moiety X)-type motif 4 (Nudt4), mRNA.                                      | -1.43 | 0.00018  |
| 13216.00     | ILMN_196581   | Mus musculus defensin, alpha 1 (Defa1), mRNA.                                                                                | -1.43 | 0.0012   |
| 240916.00    | Vsig8         | V-set and immunoglobulin domain containing 8                                                                                 | -1.44 | 1.40E-05 |
| 69123.00     | ILMN_210310   | Mus musculus RIKEN cDNA 1810022C23 gene (1810022C23Rik), mRNA.                                                               | -1.44 | 4.40E-06 |
| 15430.00     | Hoxd10        | homeobox D10                                                                                                                 | -1.46 | 0.0076   |
| 71436.00     | ILMN_210479   | Mus musculus fibronectin leucine rich transmembrane protein 3 (Flrt3), mRNA.                                                 | -1.47 | 6.50E-06 |
| 67198.00     | Spats2l       | spermatogenesis associated, serine-rich 2-like                                                                               | -1.48 | 9.60E-05 |
| 80890.00     | ILMN_187599   | Mus musculus tripartite motif protein 2 (Trim2), mRNA. XM_984114 XM_984144 XM_984172 XM_984200 XM_984238 XM_984275 XM_984313 | -1.49 | 0.00022  |
| 245049.00    | Myrip         | myosin VIIA and Rab interacting protein                                                                                      | -1.49 | 0.00029  |
| 67731.00     | Fbxo32        | F-box protein 32                                                                                                             | -1.49 | 5.80E-05 |
| 229933.00    | Clca5         | chloride channel calcium activated 5                                                                                         | -1.5  | 8.00E-06 |
| 76722.00     | Ckmt2         | creatine kinase, mitochondrial 2                                                                                             | -1.5  | 1.80E-06 |
| 16600.00     | Klf4          | Kruppel-like factor 4 (gut)                                                                                                  | -1.51 | 2.80E-05 |
| 545156.00    | Kalrn         | kalirin, RhoGEF kinase                                                                                                       | -1.51 | 0.00019  |
| 13239.00     | ILMN_196558   | Mus musculus defensin related cryptdin 5 (Defcr5), mRNA.                                                                     | -1.52 | 0.0036   |
| 101772.00    | Ano1          | anoctamin 1, calcium activated chloride channel                                                                              | -1.52 | 9.30E-06 |
| 53906.00     | Phgr1         | proline/histidine/glycine-rich 1                                                                                             | -1.52 | 3.40E-06 |
| 108079.00    | Prkaa2        | protein kinase, AMP-activated, alpha 2 catalytic subunit                                                                     | -1.53 | 0.0011   |
| 212862.00    | ILMN_218521   | Mus musculus choline phosphotransferase 1 (Chpt1), mRNA.                                                                     | -1.53 | 1.80E-05 |
| 234673.00    | Ces2e         | carboxylesterase 2E                                                                                                          | -1.53 | 0.0011   |
| 67731.00     | Fbxo32        | F-box protein 32                                                                                                             | -1.54 | 3.00E-04 |
| 13821.00     | Epb4.111      | erythrocyte protein band 4.1-like 1                                                                                          | -1.54 | 1.80E-06 |
| 19017.00     | Pparg1a       | peroxisome proliferative activated receptor, gamma, coactivator 1 alpha                                                      | -1.55 | 1.00E-04 |
| 13218.00     | Defa-rs1      | defensin, alpha, related sequence 1                                                                                          | -1.55 | 0.0076   |
| 56448.00     | ILMN_223233   | Mus musculus cytochrome P450, family 2, subfamily d, polypeptide 22 (Cyp2d22), mRNA.                                         | -1.55 | 0.0032   |
| 69574.00     | Cmbl          | carboxymethylenebutenolidase-like (Pseudomonas)                                                                              | -1.55 | 5.50E-05 |
| 433470.00    | AA467197      | expressed sequence AA467197                                                                                                  | -1.55 | 0.00059  |
| 227327.00    | B3gnt7        | UDP-GlcNAc:betaGal beta-1,3-N-acetylglucosaminyltransferase 7                                                                | -1.56 | 0.0025   |
| 11829.00     | Aqp4          | aquaporin 4                                                                                                                  | -1.56 | 0.00019  |
| 239606.00    | Slc2a13       | solute carrier family 2 (facilitated glucose transporter), member 13                                                         | -1.57 | 2.10E-05 |
| 102871.00    | D330045A20Rik | RIKEN cDNA D330045A20 gene                                                                                                   | -1.58 | 7.50E-05 |
| 231946.00    | D330028D13Rik | RIKEN cDNA D330028D13 gene                                                                                                   | -1.58 | 0.00029  |
| 23844.00     | Clca3         | chloride channel calcium activated 3                                                                                         | -1.58 | 0.0081   |
| 319848.00    | Slc17a4       | solute carrier family 17 (sodium phosphate), member 4                                                                        | -1.59 | 4.60E-05 |
| 14199.00     | Fhl1          | four and a half LIM domains 1                                                                                                | -1.59 | 0.0087   |
| 20510.00     | Slc1a1        | solute carrier family 1 (neuronal/epithelial high affinity glutamate transporter, system Xag), member 1                      | -1.6  | 3.70E-06 |
| 170677.00    | Cdhr1         | cadherin-related family member 1                                                                                             | -1.6  | 1.70E-06 |
| 68009.00     | ILMN_196346   | Mus musculus defensin related cryptdin 20 (Defcr20), mRNA.                                                                   | -1.6  | 0.00056  |
| 384061.00    | Fndc5         | fibronectin type III domain containing 5                                                                                     | -1.61 | 3.50E-07 |
| 230576.00    | Ttc22         | tetratricopeptide repeat domain 22                                                                                           | -1.62 | 5.80E-06 |
| 20541.00     | Slc8a1        | solute carrier family 8 (sodium/calcium exchanger), member 1                                                                 | -1.63 | 0.00094  |
| 207259.00    | Zbtb7c        | zinc finger and BTB domain containing 7C                                                                                     | -1.64 | 1.50E-05 |
| 13240.00     | Defa6         | defensin, alpha, 6                                                                                                           | -1.64 | 0.0011   |
| 16600.00     | Klf4          | Kruppel-like factor 4 (gut)                                                                                                  | -1.65 | 4.00E-05 |
| 433904.00    | Ociad2        | OClA domain containing 2                                                                                                     | -1.66 | 4.40E-05 |
| 56209.00     | Gde1          | glycerophosphodiester phosphodiesterase 1                                                                                    | -1.66 | 8.90E-06 |
| 14199.00     | Fhl1          | four and a half LIM domains 1                                                                                                | -1.67 | 0.003    |
| 226781.00    | Slc30a10      | solute carrier family 30, member 10                                                                                          | -1.68 | 0.0044   |
| 76722.00     | Ckmt2         | creatine kinase, mitochondrial 2                                                                                             | -1.68 | 1.10E-06 |
| 258458.00    | Olfrl165      | olfactory receptor 165                                                                                                       | -1.7  | 6.00E-06 |
| 16600.00     | Klf4          | Kruppel-like factor 4 (gut)                                                                                                  | -1.7  | 9.20E-05 |
| 56226.00     | Espn          | espin                                                                                                                        | -1.7  | 2.20E-05 |
| 20342.00     | ILMN_227312   | Mus musculus selenium binding protein 2 (Selenbp2), mRNA.                                                                    | -1.71 | 0.00044  |
| 67182.00     | Pdzk1ip1      | PDZK1 interacting protein 1                                                                                                  | -1.71 | 3.80E-05 |
| 100044204.00 | ILMN_221943   | PREDICTED: Mus musculus hypothetical protein LOC100044204 (LOC100044204), mRNA.                                              | -1.71 | 0.00011  |
| 56209.00     | Gde1          | glycerophosphodiester phosphodiesterase 1                                                                                    | -1.71 | 1.70E-06 |
| 76787.00     | Ppfia3        | protein tyrosine phosphatase, receptor type, f polypeptide (PTPRF), interacting protein (liprin), alpha 3                    | -1.74 | 3.80E-05 |
| 56209.00     | Gde1          | glycerophosphodiester phosphodiesterase 1                                                                                    | -1.74 | 4.70E-06 |
| 99663.00     | Clca6         | chloride channel calcium activated 6                                                                                         | -1.74 | 0.03     |
| 192970.00    | Dhrs11        | dehydrogenase/reductase (SDR family) member 11                                                                               | -1.74 | 5.70E-06 |
| 18858.00     | Pmp22         | peripheral myelin protein 22                                                                                                 | -1.77 | 0.00094  |

|              |             |                                                                                                                  |       |          |
|--------------|-------------|------------------------------------------------------------------------------------------------------------------|-------|----------|
| 74134.00     | Cyp2s1      | cytochrome P450, family 2, subfamily s, polypeptide 1                                                            | -1.77 | 5.00E-06 |
| 20510.00     | Slc1a1      | solute carrier family 1 (neuronal/epithelial high affinity glutamate transporter, system Xag), member 1          | -1.78 | 6.70E-07 |
| 20910.00     | Stxbp1      | syntaxin binding protein 1                                                                                       | -1.79 | 6.50E-06 |
| 66438.00     | Hamp2       | hepcidin antimicrobial peptide 2                                                                                 | -1.79 | 0.00013  |
| 71687.00     | Tmem25      | transmembrane protein 25                                                                                         | -1.8  | 2.50E-06 |
| 20755.00     | ILMN_215269 | Mus musculus small proline-rich protein 2A (Sprr2a), mRNA.                                                       | -1.8  | 7.60E-06 |
| 66090.00     | Ypel3       | yippee-like 3 (Drosophila)                                                                                       | -1.85 | 2.00E-06 |
| 68416.00     | Sycn        | syncollin                                                                                                        | -1.85 | 0.016    |
| 100041194.00 | Ahnak2      | AHNAK nucleoprotein 2                                                                                            | -1.85 | 2.90E-07 |
| 268860.00    | Abat        | 4-aminobutyrate aminotransferase                                                                                 | -1.85 | 4.40E-07 |
| 15446.00     | Hpgd        | hydroxyprostaglandin dehydrogenase 15 (NAD)                                                                      | -1.86 | 2.60E-05 |
| 12865.00     | Cox7a1      | cytochrome c oxidase, subunit VIIa 1                                                                             | -1.87 | 4.50E-06 |
| 67307.00     | Pbid2       | phenazine biosynthesis-like protein domain containing 2                                                          | -1.87 | 3.70E-07 |
| 13034.00     | ILMN_253611 | Mus musculus cathepsin E (Ctse), mRNA.                                                                           | -1.89 | 0.00017  |
| 20259.00     | Scin        | scinderin                                                                                                        | -1.9  | 4.90E-05 |
| 16429.00     | Itln1       | intelectin 1 (galactofuranose binding)                                                                           | -1.9  | 2.00E-04 |
| 12231.00     | Btn1a1      | butyrophilin, subfamily 1, member A1                                                                             | -1.91 | 4.80E-07 |
| 230163.00    | Aldob       | aldolase B, fructose-bisphosphate                                                                                | -1.91 | 0.00055  |
| 77889.00     | Lbh         | limb-bud and heart                                                                                               | -1.93 | 4.90E-05 |
| 20500.00     | Slc13a2     | solute carrier family 13 (sodium-dependent dicarboxylate transporter), member 2                                  | -1.95 | 0.00062  |
| 26456.00     | Sema4g      | sema domain, immunoglobulin domain (Ig), transmembrane domain (TM) and short cytoplasmic domain, (semaphorin) 4G | -1.96 | 4.20E-06 |
| 268860.00    | Abat        | 4-aminobutyrate aminotransferase                                                                                 | -1.96 | 1.60E-05 |
| 72948.00     | Tppp        | tubulin polymerization promoting protein                                                                         | -1.98 | 6.50E-06 |
| 56226.00     | Espn        | espin                                                                                                            | -1.98 | 2.30E-05 |
| 20363.00     | Sepp1       | selenoprotein P, plasma, 1                                                                                       | -2.02 | 0.0034   |
| 100044291.00 | ILMN_221210 | PREDICTED: Mus musculus hypothetical protein LOC100044291 (LOC100044291), mRNA.                                  | -2.02 | 9.40E-05 |
| 20531.00     | Slc34a2     | solute carrier family 34 (sodium phosphate), member 2                                                            | -2.05 | 0.0019   |
| 16173.00     | Il18        | interleukin 18                                                                                                   | -2.05 | 6.70E-05 |
| 23959.00     | Nt5e        | 5' nucleotidase, ecto                                                                                            | -2.06 | 0.0012   |
| 77889.00     | Lbh         | limb-bud and heart                                                                                               | -2.08 | 0.00014  |
| 268480.00    | Rapgef1     | Rap guanine nucleotide exchange factor (GEF)-like 1                                                              | -2.1  | 3.10E-07 |
| 23959.00     | Nt5e        | 5' nucleotidase, ecto                                                                                            | -2.11 | 2.10E-05 |
| 13370.00     | Dio1        | deiodinase, iodothyronine, type I                                                                                | -2.11 | 3.10E-06 |
| 57319.00     | Smpd3a      | sphingomyelin phosphodiesterase, acid-like 3A                                                                    | -2.12 | 8.50E-06 |
| 493583.00    | ILMN_256959 | Mus musculus intelectin b (Itlnb), mRNA.                                                                         | -2.2  | 4.00E-05 |
| 13370.00     | Dio1        | deiodinase, iodothyronine, type I                                                                                | -2.23 | 1.70E-06 |
| 12579.00     | Cdkn2b      | cyclin-dependent kinase inhibitor 2B (p15, inhibits CDK4)                                                        | -2.26 | 1.70E-06 |
| 20363.00     | Sepp1       | selenoprotein P, plasma, 1                                                                                       | -2.3  | 0.00079  |
| 268480.00    | Rapgef1     | Rap guanine nucleotide exchange factor (GEF)-like 1                                                              | -2.33 | 6.10E-06 |
| 109791.00    | Clps        | colipase, pancreatic                                                                                             | -2.37 | 2.50E-05 |
| 17287.00     | Mep1a       | meprin 1 alpha                                                                                                   | -2.41 | 0.00036  |
| 101488.00    | Slco2b1     | solute carrier organic anion transporter family, member 2b1                                                      | -2.52 | 7.30E-05 |
| 109791.00    | Clps        | colipase, pancreatic                                                                                             | -2.57 | 4.60E-05 |
| 21818.00     | Tgm3        | transglutaminase 3, E polypeptide                                                                                | -2.58 | 4.20E-05 |
| 69083.00     | Sult1c2     | sulfotransferase family, cytosolic, 1C, member 2                                                                 | -2.58 | 9.90E-08 |
| 67971.00     | Tppp3       | tubulin polymerization-promoting protein family member 3                                                         | -2.59 | 4.80E-07 |
| 53315.00     | Sult1d1     | sulfotransferase family 1D, member 1                                                                             | -2.63 | 1.60E-06 |
| 56185.00     | Hao2        | hydroxyacid oxidase 2                                                                                            | -2.67 | 7.10E-06 |
| 20887.00     | Sult1a1     | sulfotransferase family 1A, phenol-preferring, member 1                                                          | -2.7  | 2.00E-05 |
| 393082.00    | ILMN_243966 | Mus musculus methyltransferase like 7A2 (Mettl7a2), mRNA.                                                        | -2.73 | 1.30E-09 |
| 545288.00    | Cyp2c67     | cytochrome P450, family 2, subfamily c, polypeptide 67                                                           | -2.77 | 4.40E-07 |
| 13615.00     | Edn2        | endothelin 2                                                                                                     | -2.98 | 2.80E-05 |
| 22635.00     | Zan         | zonadhesin                                                                                                       | -2.99 | 3.60E-08 |
| 233038.00    | Nccrp1      | non-specific cytotoxic cell receptor protein 1 homolog (zebrafish)                                               | -3.11 | 2.10E-06 |
| 216225.00    | Slc5a8      | solute carrier family 5 (iodide transporter), member 8                                                           | -3.13 | 1.60E-06 |
| 219033.00    | Ang4        | angiogenin, ribonuclease A family, member 4                                                                      | -3.25 | 6.70E-05 |
| 13107.00     | Cyp2f2      | cytochrome P450, family 2, subfamily f, polypeptide 2                                                            | -3.49 | 3.60E-08 |
| 18947.00     | Pnliprp2    | pancreatic lipase-related protein 2                                                                              | -3.52 | 1.10E-05 |
| 232889.00    | Pla2g4c     | phospholipase A2, group IVC (cytosolic, calcium-independent)                                                     | -3.72 | 3.00E-04 |
| 331063.00    | ILMN_196357 | Mus musculus expressed sequence AI987692 (AI987692), mRNA.                                                       | -4.02 | 4.50E-06 |
| 18947.00     | Pnliprp2    | pancreatic lipase-related protein 2                                                                              | -4.18 | 2.40E-06 |
| 270328.00    | ILMN_196360 | Mus musculus gasdermin C3 (Gsdmc3), mRNA.                                                                        | -4.29 | 1.90E-07 |
| 331063.00    | Gsdmc2      | gasdermin C2                                                                                                     | -4.4  | 3.50E-07 |
| 100045250.00 | ILMN_196357 | PREDICTED: Mus musculus hypothetical protein LOC100045250 (LOC100045250), misc RNA.                              | -4.5  | 3.70E-06 |

## Supplementary Table S3

Ct values of genes analyzed by qRT-PCR in HEK293 cells treated with DMSO (control) or BIO; obtained Ct values were normalized to  $\beta$ -actin gene expression; SD, standard deviation.

| gene name | DMSO      |      | BIO       |      |
|-----------|-----------|------|-----------|------|
|           | Ct values | SD   | Ct values | SD   |
| MSX1      | 28.47     | 0.15 | 27.96     | 0.08 |
| MSX2      | 25.74     | 0.04 | 25.09     | 0.11 |
| NKD1      | 26.23     | 0.18 | 22.42     | 0.15 |
| TROY      | 26.21     | 0.05 | 24.43     | 0.11 |
| UBB       | 18.62     | 0.06 | 18.74     | 0.01 |

### Supplementary Table S3

Ct values of genes analyzed by qRT-PCR in STF cells with the intact (control) or truncated *APC* gene in exon 10 or exon 15; obtained Ct values were normalized to  $\beta$ -actin gene expression; SD, standard deviation.

| gene name | control   |      | exon 10   |      | exon 15   |      |
|-----------|-----------|------|-----------|------|-----------|------|
|           | Ct values | SD   | Ct values | SD   | Ct values | SD   |
| AXIN2     | 31.17     | 0.40 | 29.54     | 0.01 | 28.75     | 0.01 |
| MSX1      | 28.28     | 0.43 | 27.04     | 0.02 | 25.58     | 0.11 |
| MSX2      | 27.20     | 0.16 | 25.78     | 0.01 | 24.14     | 0.03 |
| NKD1      | 28.36     | 0.06 | 24.14     | 0.13 | 25.22     | 0.07 |
| UBB       | 19.40     | 0.04 | 18.97     | 0.01 | 19.80     | 0.02 |



### Supplementary Table S3

Ct values of genes analyzed by qRT-PCR in SW480 cells upon transfection with non-silencing (nsc) siRNAs or siRNAs targeting *β-catenin* mRNA; obtained Ct values were normalized to *β-actin* gene expression; SD, standard deviation.

| gene name | nsc siRNAs |      | β-catenin siRNAs |      |
|-----------|------------|------|------------------|------|
|           | Ct values  | SD   | Ct values        | SD   |
| β-CATENIN | 21.17      | 0.08 | 26.48            | 0.30 |
| MSX1      | 26.10      | 0.01 | 28.54            | 0.42 |
| MSX2      | 25.22      | 0.24 | 27.65            | 0.17 |
| NKD1      | 22.93      | 0.12 | 27.39            | 0.16 |
| TROY      | 26.72      | 0.00 | 29.23            | 0.08 |
| UBB       | 18.86      | 0.16 | 19.56            | 0.04 |

### Supplementary Table S3

Ct values of genes analyzed by qRT-PCR in SW620 cells upon transfection with non-silencing (nsc) siRNAs or siRNAs targeting *β-catenin* mRNA; obtained Ct values were normalized to *β-actin* gene expression; SD, standard deviation.

| gene name | nsc siRNAs |      | β-catenin siRNAs |      |
|-----------|------------|------|------------------|------|
|           | Ct values  | SD   | Ct values        | SD   |
| β-CATENIN | 20.59      | 1.15 | 23.66            | 0.10 |
| MSX1      | 20.64      | 0.04 | 24.39            | 0.06 |
| MSX2      | 24.28      | 0.06 | 25.99            | 0.11 |
| NKD1      | 20.90      | 0.16 | 25.12            | 0.01 |
| TROY      | 27.24      | 0.25 | 29.14            | 0.42 |
| UBB       | 17.47      | 0.39 | 17.81            | 0.25 |

### Supplementary Table S3

Ct values of genes analyzed by qRT-PCR in STF cells with the *APC* gene truncated in exon 10 upon transfection with non-silencing (nsc) siRNAs or siRNAs targeting *β-catenin* mRNA; obtained Ct values were normalized to *β-actin* gene expression; SD, standard deviation.

| gene name | nsc siRNAs |      | β-catenin siRNAs |      |
|-----------|------------|------|------------------|------|
|           | Ct values  | SD   | Ct values        | SD   |
| AXIN2     | 23.68      | 0.02 | 25.10            | 0.02 |
| β-CATENIN | 22.48      | 0.08 | 25.75            | 0.11 |
| MSX1      | 28.99      | 0.14 | 29.83            | 0.10 |
| MSX2      | 26.31      | 0.09 | 27.15            | 0.09 |
| UBB       | 19.56      | 0.05 | 19.38            | 0.03 |

## Supplementary Table S4

Differentially expressed genes (with  $|\log_2FC| \geq 1$ ;  $p \leq 0.05$ ) in the small intestinal *Msx1* wt and *Msx1*-deficient hyperplastic epithelium

| ENTREZ    | SYMBOL   | GENENAME                                                                               | logFC | p-value  |
|-----------|----------|----------------------------------------------------------------------------------------|-------|----------|
| 170942    | Erdrl    | erythroid differentiation regulator 1                                                  | 3.52  | 2.00E-04 |
| 57742     | Abhd1    | abhydrolase domain containing 1                                                        | 2.93  | 4.10E-05 |
| 57742     | Abhd1    | abhydrolase domain containing 1                                                        | 2.84  | 5.60E-05 |
| 434794    |          | Mus musculus X-linked lymphocyte-regulated 4A (Xlr4a), mRNA                            | 2.81  | 0.0083   |
| 11746     | Anxa4    | annexin A4                                                                             | 2.77  | 0.066    |
| 57742     | Abhd1    | abhydrolase domain containing 1                                                        | 2.26  | 0.00068  |
| 68337     | Crip2    | cysteine rich protein 2                                                                | 2.19  | 6.90E-05 |
| 223227    | Sox21    | SRY (sex determining region Y)-box 21                                                  | 2.1   | 0.0098   |
| 20249     | Scd1     | stearoyl-Coenzyme A desaturase 1                                                       | 2.03  | 0.001    |
| 15122     |          | Mus musculus hemoglobin alpha, adult chain 1 (Hba-a1), mRNA.                           | 1.92  | 0.19     |
| 19652     | Rbm3     | RNA binding motif protein 3                                                            | 1.88  | 0.0014   |
| 14733     | Gpc1     | glypican 1                                                                             | 1.88  | 0.018    |
| 406217    | Bex4     | brain expressed X-linked 4                                                             | 1.79  | 0.014    |
| 14472     | Gbx2     | gastrulation brain homeobox 2                                                          | 1.78  | 0.019    |
| 223227    | Sox21    | SRY (sex determining region Y)-box 21                                                  | 1.77  | 0.014    |
| 20350     | Sema3f   | sema domain, immunoglobulin domain (Ig), short basic domain, secreted, (semaphorin) 3F | 1.67  | 0.014    |
| 192212    | Prom2    | prominin 2                                                                             | 1.65  | 0.048    |
| 69195     | Tmem121  | transmembrane protein 121                                                              | 1.64  | 0.14     |
| 64293     | Stk32b   | serine/threonine kinase 32B                                                            | 1.64  | 0.00092  |
| 23962     | Oasl2    | 2'-5' oligoadenylate synthetase-like 2                                                 | 1.57  | 0.0045   |
| 16145     | Igtp     | interferon gamma induced GTPase                                                        | 1.57  | 0.1      |
| 329064    | Pkd21l   | polycystic kidney disease 2-like 1                                                     | 1.52  | 0.0026   |
| 15360     | Hmgcs2   | 3-hydroxy-3-methylglutaryl-Coenzyme A synthase 2                                       | 1.52  | 0.006    |
| 14469     | Gbp2     | guanylate binding protein 2                                                            | 1.5   | 0.22     |
| 21380     | Tbx1     | T-box 1                                                                                | 1.49  | 0.0081   |
| 20350     | Sema3f   | sema domain, immunoglobulin domain (Ig), short basic domain, secreted, (semaphorin) 3F | 1.42  | 0.013    |
| 100038882 | Isg15    | ISG15 ubiquitin-like modifier                                                          | 1.41  | 0.067    |
| 17329     | Cxcl9    | chemokine (C-X-C motif) ligand 9                                                       | 1.41  | 0.12     |
| 68713     | Ifitm1   | interferon induced transmembrane protein 1                                             | 1.34  | 0.11     |
| 76943     | Psap1l   | prosaposin-like 1                                                                      | 1.32  | 0.0097   |
| 13644     | Efs      | embryonal Fyn-associated substrate                                                     | 1.32  | 0.02     |
| 72434     | Lypd3    | Ly6/Plaur domain containing 3                                                          | 1.31  | 0.011    |
| 67855     | Asprv1   | aspartic peptidase, retroviral-like 1                                                  | 1.31  | 0.047    |
| 22269     | Upk2     | uroplakin 2                                                                            | 1.3   | 0.0084   |
| 24110     | Usp18    | ubiquitin specific peptidase 18                                                        | 1.29  | 0.018    |
| 52250     | Reep1    | receptor accessory protein 1                                                           | 1.29  | 0.015    |
| 11749     | Anxa6    | annexin A6                                                                             | 1.28  | 0.049    |
| 226245    | Plekhs1  | pleckstrin homology domain containing, family S member 1                               | 1.28  | 0.028    |
| 20671     | Sox17    | SRY (sex determining region Y)-box 17                                                  | 1.27  | 0.05     |
| 108052    | Slc14a1  | solute carrier family 14 (urea transporter), member 1                                  | 1.27  | 0.002    |
| 11567     | Avil     | advillin                                                                               | 1.27  | 0.14     |
| 67967     | Pold3    | polymerase (DNA-directed), delta 3, accessory subunit                                  | 1.26  | 0.0033   |
| 58185     | Rsad2    | radical S-adenosyl methionine domain containing 2                                      | 1.25  | 0.024    |
| 17242     | Mdk      | midkine                                                                                | 1.25  | 4.10E-05 |
| 20129     | Rptn     | repetin                                                                                | 1.24  | 0.0021   |
| 20671     | Sox17    | SRY (sex determining region Y)-box 17                                                  | 1.23  | 0.0072   |
| 67951     | Tubb6    | tubulin, beta 6 class V                                                                | 1.21  | 0.04     |
| 20910     | Stxbp1   | syntaxin binding protein 1                                                             | 1.21  | 0.0026   |
| 268396    | Sh3pxd2b | SH3 and PX domains 2B                                                                  | 1.2   | 0.0029   |
| 13034     | Ctse     | cathepsin E                                                                            | 1.2   | 0.11     |
| 22153     | Tubb4a   | tubulin, beta 4A class IVA                                                             | 1.19  | 0.053    |
| 15959     | Ifit3    | interferon-induced protein with tetratricopeptide repeats 3                            | 1.19  | 0.041    |
| 231050    | Galnt11  | UDP-N-acetyl-alpha-D-galactosamine:polypeptide N-acetylgalactosaminyltransferase 11    | 1.19  | 0.036    |
| 69065     | Chac1    | ChaC, cation transport regulator 1                                                     | 1.18  | 0.045    |
| 108052    | Slc14a1  | solute carrier family 14 (urea transporter), member 1                                  | 1.17  | 0.012    |
| 654824    | Ankrd37  | ankyrin repeat domain 37                                                               | 1.17  | 0.0047   |
| 225027    | Srsf7    | serine/arginine-rich splicing factor 7                                                 | 1.16  | 0.039    |
| 240334    | Pcyox11  | prenylcysteine oxidase 1 like                                                          | 1.16  | 0.001    |
| 246728    | Oas2     | 2'-5' oligoadenylate synthetase 2                                                      | 1.15  | 0.12     |
| 27261     | Dok3     | docking protein 3                                                                      | 1.15  | 0.0033   |
| 74007     | Btd11    | BTB (POZ) domain containing 11                                                         | 1.15  | 0.042    |
| 11752     | Anxa8    | annexin A8                                                                             | 1.12  | 0.1      |
| 22228     | Ucp2     | uncoupling protein 2 (mitochondrial, proton carrier)                                   | 1.1   | 9.60E-05 |
| 226123    | Morn4    | MORN repeat containing 4                                                               | 1.1   | 0.0011   |
| 406217    |          | Mus musculus brain expressed gene 4 (Bex4), mRNA.                                      | 1.09  | 0.027    |
| 244886    | Tmem266  | transmembrane protein 266                                                              | 1.09  | 0.0042   |
| 240675    | Vwa2     | von Willebrand factor A domain containing 2                                            | 1.08  | 0.0048   |
| 58194     | Sh3kbp1  | SH3-domain kinase binding protein 1                                                    | 1.08  | 0.058    |
| 331063    | Gsdmc2   | gasdermin C2                                                                           | 1.08  | 0.0099   |
| 18812     | Prl2c3   | prolactin family 2, subfamily c, member 3                                              | 1.07  | 0.0057   |

|        |          |                                                                                                                      |       |         |
|--------|----------|----------------------------------------------------------------------------------------------------------------------|-------|---------|
| 27395  | Mrp115   | mitochondrial ribosomal protein L15                                                                                  | 1.07  | 0.0046  |
| 24110  | Usp18    | ubiquitin specific peptidase 18                                                                                      | 1.07  | 0.0093  |
| 15958  | Ifit2    | interferon-induced protein with tetratricopeptide repeats 2                                                          | 1.07  | 0.02    |
| 54396  | Irgm2    | immunity-related GTPase family M member 2                                                                            | 1.06  | 0.17    |
| 15505  | Hsph1    | heat shock 105kDa/110kDa protein 1                                                                                   | 1.06  | 0.003   |
| 24110  | Usp18    | ubiquitin specific peptidase 18                                                                                      | 1.05  | 0.023   |
| 331063 | Gsdmc2   | gasdermin C2                                                                                                         | 1.05  | 0.021   |
| 54352  | Irx5     | Iroquois related homeobox 5 (Drosophila)                                                                             | 1.03  | 0.011   |
| 11639  | Ak4      | adenylate kinase 4                                                                                                   | 1.02  | 0.061   |
| 74777  | Sepr1    | selenoprotein N, 1                                                                                                   | 1.01  | 0.02    |
| 213171 | Prss27   | protease, serine 27                                                                                                  | 1.01  | 0.06    |
| 21939  | Cd40     | CD40 antigen                                                                                                         | 1.01  | 0.002   |
| 21858  | Timp2    | tissue inhibitor of metalloproteinase 2                                                                              | 1     | 0.016   |
| 22379  | Fmn13    | formin-like 3                                                                                                        | 1     | 0.18    |
| 11684  | Alox12   | arachidonate 12-lipoxygenase                                                                                         | 1     | 0.0048  |
| 381524 | AI427809 | expressed sequence AI427809                                                                                          | 1     | 0.0057  |
| 67800  | Dgat2    | diacylglycerol O-acyltransferase 2                                                                                   | -1    | 0.0065  |
| 21685  | Tef      | thyrotroph embryonic factor                                                                                          | -1.01 | 0.012   |
| 217166 | Nr1d1    | nuclear receptor subfamily 1, group D, member 1                                                                      | -1.01 | 0.034   |
| 56615  | Mgst1    | microsomal glutathione S-transferase 1                                                                               | -1.01 | 0.021   |
| 216136 | Ilvbl    | ilvB (bacterial acetolactate synthase)-like                                                                          | -1.01 | 0.0079  |
| 66412  | Ardc4    | arrestin domain containing 4                                                                                         | -1.02 | 0.0092  |
| 74525  | Fam234b  | family with sequence similarity 234, member B                                                                        | -1.02 | 0.0084  |
| 330962 | Slc51b   | solute carrier family 51, beta subunit                                                                               | -1.03 | 0.17    |
| 14345  | Fut4     | fucosyltransferase 4                                                                                                 | -1.03 | 0.0057  |
| 74519  | Cyp2j9   | cytochrome P450, family 2, subfamily j, polypeptide 9                                                                | -1.03 | 0.18    |
| 11459  | Acta1    | actin, alpha 1, skeletal muscle                                                                                      | -1.03 | 0.06    |
| 50934  | Slc7a8   | solute carrier family 7 (cationic amino acid transporter, y+ system), member 8                                       | -1.04 | 0.022   |
| 71584  | Gdpd2    | glycerophosphodiester phosphodiesterase domain containing 2                                                          | -1.04 | 0.0091  |
| 226040 | Tmem252  | transmembrane protein 252                                                                                            | -1.04 | 0.00038 |
| 101488 | Slco2b1  | solute carrier organic anion transporter family, member 2b1                                                          | -1.05 | 0.015   |
| 74338  | Slc6a19  | solute carrier family 6 (neurotransmitter transporter), member 19                                                    | -1.05 | 0.11    |
| 18150  |          | Mus musculus nucleoplamin 3 (Npm3), mRNA.                                                                            | -1.05 | 0.043   |
| 18096  | Nkx6-1   | NK6 homeobox 1                                                                                                       | -1.05 | 0.04    |
| 13088  | Cyp2b10  | cytochrome P450, family 2, subfamily b, polypeptide 10                                                               | -1.05 | 0.11    |
| 100434 | Slc44a1  | solute carrier family 44, member 1                                                                                   | -1.06 | 0.0037  |
| 19341  | Rab4a    | RAB4A, member RAS oncogene family                                                                                    | -1.06 | 0.0069  |
| 18036  | Nfkib1   | nuclear factor of kappa light polypeptide gene enhancer in B cells inhibitor, beta                                   | -1.06 | 0.004   |
| 433278 | Khdc1c   | KH domain containing 1C                                                                                              | -1.06 | 0.00052 |
| 14219  | Ctgf     | connective tissue growth factor                                                                                      | -1.06 | 0.00012 |
| 68396  | Nat8     | N-acetyltransferase 8 (GCN5-related)                                                                                 | -1.06 | 0.16    |
| 223631 | BC025446 | cDNA sequence BC025446                                                                                               | -1.06 | 0.056   |
| 66273  | Aamd1    | adipogenesis associated Mth938 domain containing                                                                     | -1.06 | 0.0027  |
| 225997 | Trpm6    | transient receptor potential cation channel, subfamily M, member 6                                                   | -1.07 | 0.00025 |
| 242864 | Napepld  | N-acyl phosphatidylethanolamine phospholipase D                                                                      | -1.07 | 0.038   |
| 68943  | Pink1    | PTEN induced putative kinase 1                                                                                       | -1.07 | 0.0039  |
| 15186  | Hdc      | histidine decarboxylase                                                                                              | -1.07 | 0.012   |
| 97998  | Depr1    | DEP domain containing MTOR-interacting protein                                                                       | -1.07 | 0.018   |
| 11829  | Aqp4     | aquaporin 4                                                                                                          | -1.07 | 0.0059  |
| 23849  | Klf6     | Kruppel-like factor 6                                                                                                | -1.08 | 0.00018 |
| 13120  | Cyp4b1   | cytochrome P450, family 4, subfamily b, polypeptide 1                                                                | -1.08 | 0.11    |
| 381903 | Alg8     | asparagine-linked glycosylation 8 (alpha-1,3-glucoyltransferase)                                                     | -1.08 | 0.017   |
| 230163 | Aldob    | aldolase B, fructose-bisphosphate                                                                                    | -1.08 | 0.052   |
| 11539  | Adora1   | adenosine A1 receptor                                                                                                | -1.08 | 0.0032  |
| 217166 | Nr1d1    | nuclear receptor subfamily 1, group D, member 1                                                                      | -1.09 | 0.061   |
| 72303  | Cyp2c65  | cytochrome P450, family 2, subfamily c, polypeptide 65                                                               | -1.09 | 0.11    |
| 102294 | Cyp4v3   | cytochrome P450, family 4, subfamily v, polypeptide 3                                                                | -1.1  | 0.14    |
| 22064  |          | Mus musculus transient receptor potential cation channel, subfamily C, member 2 (Trpc2), transcript variant 1, mRNA. | -1.11 | 0.019   |
| 208659 | Fam20a   | family with sequence similarity 20, member A                                                                         | -1.11 | 0.0055  |
| 71972  | Dnmbp    | dynamitin binding protein                                                                                            | -1.11 | 0.034   |
| 104681 | Slc16a6  | solute carrier family 16 (monocarboxylic acid transporters), member 6                                                | -1.14 | 0.0023  |
| 13106  | Cyp2e1   | cytochrome P450, family 2, subfamily e, polypeptide 1                                                                | -1.14 | 0.22    |
| 19329  | Rab17    | RAB17, member RAS oncogene family                                                                                    | -1.15 | 0.0031  |
| 104009 | Qsox1    | quiescins Q6 sulfhydryl oxidase 1                                                                                    | -1.15 | 0.0048  |
| 17988  | Ndr1     | N-myc downstream regulated gene 1                                                                                    | -1.15 | 0.061   |
| 18604  | Pdk2     | pyruvate dehydrogenase kinase, isoenzyme 2                                                                           | -1.16 | 0.063   |
| 57257  | Vav3     | vav 3 oncogene                                                                                                       | -1.17 | 0.017   |
| 104158 | Ces1d    | carboxylesterase 1D                                                                                                  | -1.17 | 0.3     |
| 14164  | Fgf1     | fibroblast growth factor 1                                                                                           | -1.18 | 0.035   |
| 225913 | Tkfc     | triokinase, FMN cyclase                                                                                              | -1.19 | 0.0058  |
| 230163 | Aldob    | aldolase B, fructose-bisphosphate                                                                                    | -1.19 | 0.028   |
| 72514  | Fgfbp3   | fibroblast growth factor binding protein 3                                                                           | -1.2  | 0.0013  |
| 67470  | Abcg8    | ATP-binding cassette, sub-family G (WHITE), member 8                                                                 | -1.2  | 0.0086  |
| 20526  | Slc2a2   | solute carrier family 2 (facilitated glucose transporter), member 2                                                  | -1.21 | 0.037   |
| 68404  | Nrn1     | neuritin 1                                                                                                           | -1.21 | 0.0021  |
| 109731 | Maob     | monoamine oxidase B                                                                                                  | -1.21 | 0.065   |

|        |          |                                                                                       |       |          |
|--------|----------|---------------------------------------------------------------------------------------|-------|----------|
| 71584  | Gdpd2    | glycerophosphodiester phosphodiesterase domain containing 2                           | -1.22 | 0.019    |
| 56643  | Slc15a1  | solute carrier family 15 (oligopeptide transporter), member 1                         | -1.23 | 0.076    |
| 15199  | Hebp1    | heme binding protein 1                                                                | -1.23 | 0.052    |
| 114664 | Hsd17b11 | hydroxysteroid (17-beta) dehydrogenase 11                                             | -1.24 | 0.02     |
| 14456  | Gas6     | growth arrest specific 6                                                              | -1.24 | 0.014    |
| 11826  | Aqp1     | aquaporin 1                                                                           | -1.24 | 0.036    |
| 117591 | Slc2a9   | solute carrier family 2 (facilitated glucose transporter), member 9                   | -1.25 | 0.0094   |
| 328059 | Slc7a15  | solute carrier family 7 (cationic amino acid transporter, y+ system), member 15       | -1.26 | 0.12     |
| 72373  | Psca     | prostate stem cell antigen                                                            | -1.26 | 0.0058   |
| 15567  | Slc6a4   | solute carrier family 6 (neurotransmitter transporter, serotonin), member 4           | -1.29 | 0.006    |
| 68180  | Hyi      | hydroxypyruvate isomerase (putative)                                                  | -1.29 | 0.0043   |
| 192653 | Ttc36    | tetratricopeptide repeat domain 36                                                    | -1.31 | 0.0019   |
| 76279  | Cyp2d26  | cytochrome P450, family 2, subfamily d, polypeptide 26                                | -1.31 | 0.18     |
| 67473  | Slc47a1  | solute carrier family 47, member 1                                                    | -1.31 | 0.17     |
| 15446  | Hpgd     | hydroxyprostaglandin dehydrogenase 15 (NAD)                                           | -1.34 | 0.06     |
| 12696  | Cirbp    | cold inducible RNA binding protein                                                    | -1.34 | 0.0014   |
| 26458  | Slc27a2  | solute carrier family 27 (fatty acid transporter), member 2                           | -1.35 | 0.0039   |
| 104681 | Slc16a6  | solute carrier family 16 (monocarboxylic acid transporters), member 6                 | -1.37 | 0.0067   |
| 14164  | Fgf1     | fibroblast growth factor 1                                                            | -1.37 | 0.021    |
| 69983  | Sis      | sucrase isomaltase (alpha-glucosidase)                                                | -1.37 | 0.0039   |
| 93695  | Gpnmb    | glycoprotein (transmembrane) nmb                                                      | -1.38 | 0.11     |
| 56350  | Arl3     | ADP-ribosylation factor-like 3                                                        | -1.39 | 4.00E-04 |
| 108099 | Prkag2   | protein kinase, AMP-activated, gamma 2 non-catalytic subunit                          | -1.4  | 0.0035   |
| 232889 | Pla2g4c  | phospholipase A2, group IVC (cytosolic, calcium-independent)                          | -1.4  | 0.22     |
| 209387 | Trim30d  | tripartite motif-containing 30D                                                       | -1.4  | 0.03     |
| 384783 | Irs2     | insulin receptor substrate 2                                                          | -1.43 | 0.0096   |
| 20526  | Slc2a2   | solute carrier family 2 (facilitated glucose transporter), member 2                   | -1.44 | 0.033    |
| 78748  | Rassf10  | Ras association (RalGDS/AF-6) domain family (N-terminal) member 10                    | -1.45 | 0.0065   |
| 27276  | Plekhh1  | pleckstrin homology domain containing, family B (evectins) member 1                   | -1.46 | 0.0011   |
| 11826  | Aqp1     | aquaporin 1                                                                           | -1.46 | 0.021    |
| 235674 | Acaa1b   | acetyl-Coenzyme A acyltransferase 1B                                                  | -1.47 | 0.19     |
| 66116  | Nat8f1   | N-acetyltransferase 8 (GCN5-related) family member 1                                  | -1.48 | 4.00E-04 |
| 69710  | Arap1    | ArfGAP with RhoGAP domain, ankyrin repeat and PH domain 1                             | -1.48 | 0.00034  |
| 20526  | Slc2a2   | solute carrier family 2 (facilitated glucose transporter), member 2                   | -1.54 | 0.067    |
| 66298  | Defa21   | defensin, alpha, 21                                                                   | -1.56 | 0.0033   |
| 76279  | Cyp2d26  | cytochrome P450, family 2, subfamily d, polypeptide 26                                | -1.57 | 0.18     |
| 170442 | Bbox1    | butyrobetaine (gamma), 2-oxoglutarate dioxygenase 1 (gamma-butyrobetaine hydroxylase) | -1.58 | 0.026    |
| 76279  | Cyp2d26  | cytochrome P450, family 2, subfamily d, polypeptide 26                                | -1.59 | 0.14     |
| 20887  | Sult1a1  | sulfotransferase family 1A, phenol-preferring, member 1                               | -1.6  | 0.049    |
| 11826  | Aqp1     | aquaporin 1                                                                           | -1.6  | 0.011    |
| 20019  | Polr1a   | polymerase (RNA) I polypeptide A                                                      | -1.61 | 0.00012  |
| 16204  | Fabp6    | fatty acid binding protein 6, ileal (gastrotropin)                                    | -1.62 | 0.2      |
| 67432  | Hoga1    | 4-hydroxy-2-oxoglutarate aldolase 1                                                   | -1.64 | 0.0047   |
| 381058 | Unc93a   | unc-93 homolog A (C. elegans)                                                         | -1.65 | 0.019    |
| 545902 | Ptprh    | protein tyrosine phosphatase, receptor type, H                                        | -1.67 | 0.0083   |
| 20170  | Hps6     | Hermansky-Pudlak syndrome 6                                                           | -1.72 | 0.00016  |
| 233575 | Pgap2    | post-GPI attachment to proteins 2                                                     | -1.73 | 0.0023   |
| 53315  | Sult1d1  | sulfotransferase family 1D, member 1                                                  | -1.76 | 0.0043   |
| 11997  | Akr1b7   | aldo-keto reductase family 1, member B7                                               | -1.78 | 0.026    |
| 14121  | Fbp1     | fructose biphosphatase 1                                                              | -1.79 | 0.016    |
| 16548  | Khk      | ketoheokinase                                                                         | -1.86 | 0.0085   |
| 16548  | Khk      | ketoheokinase                                                                         | -1.9  | 0.0022   |
| 67432  | Hoga1    | 4-hydroxy-2-oxoglutarate aldolase 1                                                   | -1.9  | 0.013    |
| 14377  | G6pc     | glucose-6-phosphatase, catalytic                                                      | -1.95 | 0.021    |
| 192236 | Hps1     | Hermansky-Pudlak syndrome 1                                                           | -2.05 | 0.00082  |
| 54150  | Rdh7     | retinol dehydrogenase 7                                                               | -2.08 | 0.033    |
| 233549 | Mogat2   | monoacylglycerol O-acyltransferase 2                                                  | -2.12 | 0.0023   |
| 69710  | Arap1    | ArfGAP with RhoGAP domain, ankyrin repeat and PH domain 1                             | -2.12 | 0.0015   |
| 11522  | Adh1     | alcohol dehydrogenase 1 (class I)                                                     | -2.13 | 0.012    |
| 56018  | Stard10  | START domain containing 10                                                            | -2.14 | 0.0017   |
| 12780  | Abcc2    | ATP-binding cassette, sub-family C (CFTR/MRP), member 2                               | -2.18 | 0.0059   |
| 54150  | Rdh7     | retinol dehydrogenase 7                                                               | -2.23 | 0.032    |
| 56388  | Cyp3a25  | cytochrome P450, family 3, subfamily a, polypeptide 25                                | -2.4  | 0.034    |
| 11522  | Adh1     | alcohol dehydrogenase 1 (class I)                                                     | -2.44 | 0.0073   |
| 17921  | Myo7a    | myosin VIIA                                                                           | -2.54 | 0.0032   |
| 13112  | Cyp3a11  | cytochrome P450, family 3, subfamily a, polypeptide 11                                | -2.82 | 0.065    |
| 17701  | Msx1     | msh homeobox 1                                                                        | -3.05 | 0.064    |
| 233549 | Mogat2   | monoacylglycerol O-acyltransferase 2                                                  | -3.14 | 0.0037   |
| 233571 | P2ry6    | pyrimidinergic receptor P2Y, G-protein coupled, 6                                     | -3.31 | 0.00024  |
| 18479  | Pak1     | p21 protein (Cdc42/Rac)-activated kinase 1                                            | -3.4  | 0.003    |
| 68185  | Coa4     | cytochrome c oxidase assembly factor 4                                                | -3.44 | 8.00E-04 |
| 52443  | Mrpl48   | mitochondrial ribosomal protein L48                                                   | -3.56 | 0.0018   |
| 52443  | Mrpl48   | mitochondrial ribosomal protein L48                                                   | -3.77 | 0.0016   |
| 27050  | Rps3     | ribosomal protein S3                                                                  | -6.14 | 0.0025   |

## Supplementary Table S5

Ct values of genes analyzed in the small intestinal epithelium of the indicated mice 7 days after tamoxifen administration; the values were normalized to  $\beta$ -actin gene expression; SD, standard deviation.

| gene name      | Control   |      | <i>Apc</i> <sup>KO/KO</sup> <i>Msx1</i> <sup>+/+</sup> |      | <i>Apc</i> <sup>KO/KO</sup> <i>Msx1</i> <sup>KO/KO</sup> |      |
|----------------|-----------|------|--------------------------------------------------------|------|----------------------------------------------------------|------|
|                | Ct values | SD   | Ct values                                              | SD   | Ct values                                                | SD   |
| Ascl2          | 34.25     | 0.80 | 27.76                                                  | 0.51 | 27.26                                                    | 0.15 |
| Axin2          | 30.52     | 0.74 | 25.49                                                  | 0.58 | 25.27                                                    | 0.11 |
| Chromogranin A | 28.48     | 0.49 | 28.21                                                  | 0.33 | 28.97                                                    | 0.35 |
| GAPDH          | 21.43     | 0.31 | 20.84                                                  | 0.59 | 20.31                                                    | 0.14 |
| Lgr5           | 34.10     | 0.62 | 28.98                                                  | 0.49 | 28.60                                                    | 0.03 |
| Msx1           | 42.54     | 1.51 | 28.95                                                  | 0.95 | 32.64                                                    | 0.72 |
| Msx2           | 45.11     | 0.69 | 34.54                                                  | 0.16 | 34.31                                                    | 1.04 |
| SI             | 25.27     | 0.73 | 27.27                                                  | 0.01 | 28.73                                                    | 0.46 |
| SP5            | 30.74     | 0.46 | 27.34                                                  | 1.19 | 26.73                                                    | 0.15 |

## Supplementary Table S6

Differentially expressed genes ( $|\log_{2}FC| \geq 0.8$ ) in the *Apc/Msx1* double-deficient colonic mucosa when compared to the *Apc*-deficient tissue with intact *Msx1*

| PROBE ID           | ENSEMBL ID         | SYMBOL        | GENENAME                                                                     | log <sub>2</sub> FC | p-value  |
|--------------------|--------------------|---------------|------------------------------------------------------------------------------|---------------------|----------|
| ENSMUST00000094836 | ENSMUSG00000029123 | Stk32b        | serine/threonine kinase 32B                                                  | 2.06e+00            | 3.70e-09 |
| ENSMUST00000103399 | ENSMUSG00000076598 | Igkv3-7       | immunoglobulin kappa variable 3-7                                            | 1.94e+00            | 8.93e-04 |
| ENSMUST00000197560 | ENSMUSG00000076598 | Igkv3-7       | immunoglobulin kappa variable 3-7                                            | 1.94e+00            | 8.93e-04 |
| ENSMUST00000177591 | ENSMUSG00000096768 | Erdr1         | erythroid differentiation regulator 1                                        | 1.48e+00            | 2.43e-02 |
| ENSMUST00000177671 | ENSMUSG00000096768 | Erdr1         | erythroid differentiation regulator 1                                        | 1.44e+00            | 2.60e-02 |
| ENSMUST00000178789 | ENSMUSG00000095562 | Gm21887       | predicted gene, 21887                                                        | 1.37e+00            | 2.73e-02 |
| ENSMUST00000179483 | ENSMUSG00000096768 | Erdr1         | erythroid differentiation regulator 1                                        | 1.37e+00            | 2.73e-02 |
| ENSMUST00000180251 | ENSMUSG00000095562 | Gm21887       | predicted gene, 21887                                                        | 1.37e+00            | 2.73e-02 |
| ENSMUST00000044159 | ENSMUSG00000060807 | Serpina6      | serine (or cysteine) peptidase inhibitor, clade A, member 6                  | 1.36e+00            | 1.54e-04 |
| ENSMUST00000179077 | ENSMUSG00000096768 | Erdr1         | erythroid differentiation regulator 1                                        | 1.34e+00            | 2.64e-02 |
| ENSMUST00000100692 | ENSMUSG00000095528 | Gm10375       | predicted gene 10375                                                         | 1.16e+00            | 3.12e-02 |
| ENSMUST00000163970 | ENSMUSG00000095528 | Gm10375       | predicted gene 10375                                                         | 1.16e+00            | 3.12e-02 |
| ENSMUST00000196706 | ENSMUSG00000027869 | Hsd3b6        | hydroxy-delta-5-steroid dehydrogenase, 3 beta- and steroid delta-isomerase 6 | 1.15e+00            | 4.68e-04 |
| ENSMUST00000211636 | ENSMUSG00000040640 | Erc2          | ELKS/RAB6-interacting/CAST family member 2                                   | 1.15e+00            | 8.61e-04 |
| ENSMUST00000144418 | ENSMUSG00000028469 | Npr2          | natriuretic peptide receptor 2                                               | 1.15e+00            | 1.48e-02 |
| ENSMUST00000172766 | ENSMUSG00000050423 | Ppp1r3g       | protein phosphatase 1, regulatory (inhibitor) subunit 3G                     | 1.13e+00            | 5.97e-03 |
| ENSMUST00000113512 | ENSMUSG00000073643 | Wdfy1         | WD repeat and FYVE domain containing 1                                       | 1.12e+00            | 3.83e-03 |
| ENSMUST00000113513 | ENSMUSG00000073643 | Wdfy1         | WD repeat and FYVE domain containing 1                                       | 1.12e+00            | 3.83e-03 |
| ENSMUST00000113514 | ENSMUSG00000073643 | Wdfy1         | WD repeat and FYVE domain containing 1                                       | 1.12e+00            | 3.83e-03 |
| ENSMUST00000113515 | ENSMUSG00000073643 | Wdfy1         | WD repeat and FYVE domain containing 1                                       | 1.12e+00            | 3.83e-03 |
| ENSMUST00000187005 | ENSMUSG00000073643 | Wdfy1         | WD repeat and FYVE domain containing 1                                       | 1.12e+00            | 3.73e-03 |
| ENSMUST00000203150 | ENSMUSG00000030361 | Klrb1a        | killer cell lectin-like receptor subfamily B member 1A                       | 1.06e+00            | 4.21e-02 |
| ENSMUST00000172486 | ENSMUSG00000015222 | Map2          | microtubule-associated protein 2                                             | 1.05e+00            | 8.34e-03 |
| ENSMUST00000135885 | ENSMUSG00000029095 | Ablim2        | actin-binding LIM protein 2                                                  | 1.04e+00            | 1.43e-04 |
| ENSMUST00000186702 | ENSMUSG00000041460 | Caena2d4      | calcium channel, voltage-dependent, alpha 2/delta subunit 4                  | 1.03e+00            | 5.87e-03 |
| ENSMUST00000131920 | ENSMUSG00000023267 | Gabbr2        | gamma-aminobutyric acid (GABA) C receptor, subunit rho 2                     | 1.03e+00            | 3.48e-02 |
| ENSMUST00000171262 | ENSMUSG00000006711 | D130043K22Rik | RIKEN cDNA D130043K22 gene                                                   | 1.01e+00            | 1.44e-02 |
| ENSMUST00000186394 | ENSMUSG00000074109 | Mrgprx2       | MAS-related GPR, member X2                                                   | 1.00e+00            | 8.34e-03 |
| ENSMUST00000103483 | ENSMUSG00000076674 | Ighv3-8       | immunoglobulin heavy variable V3-8                                           | 9.86e-01            | 3.05e-01 |
| ENSMUST00000185329 | ENSMUSG00000025932 | Eya1          | EYA transcriptional coactivator and phosphatase 1                            | 9.84e-01            | 4.82e-02 |
| ENSMUST00000040361 | ENSMUSG00000039347 | Atp6v0e2      | ATPase, H+ transporting, lysosomal V0 subunit E2                             | 9.79e-01            | 5.14e-03 |
| ENSMUST00000136987 | ENSMUSG00000043587 | Pxylp1        | 2-phosphoxylese phosphatase 1                                                | 9.68e-01            | 9.28e-04 |
| ENSMUST00000144697 | ENSMUSG00000026999 | Nup35         | nucleoporin 35                                                               | 9.67e-01            | 1.95e-02 |
| ENSMUST00000153129 | ENSMUSG00000028047 | Thbs3         | thrombospondin 3                                                             | 9.65e-01            | 4.39e-02 |
| ENSMUST00000103350 | ENSMUSG00000076549 | Igkv4-68      | immunoglobulin kappa variable 4-68                                           | 9.63e-01            | 1.02e-02 |
| ENSMUST00000137290 | ENSMUSG00000031698 | Mylk3         | myosin light chain kinase 3                                                  | 9.62e-01            | 1.37e-02 |
| ENSMUST00000169797 | ENSMUSG00000037849 | Ifi206        | interferon activated gene 206                                                | 9.49e-01            | 7.66e-02 |
| ENSMUST00000155275 | ENSMUSG00000021596 | Mctp1         | multiple C2 domains, transmembrane 1                                         | 9.39e-01            | 6.10e-03 |
| ENSMUST00000162154 | ENSMUSG00000022148 | Fyb           | FYN binding protein                                                          | 9.37e-01            | 1.19e-02 |
| ENSMUST00000161947 | ENSMUSG00000022148 | Fyb           | FYN binding protein                                                          | 9.29e-01            | 7.54e-03 |
| ENSMUST00000190151 | ENSMUSG00000021209 | Ppp4r4        | protein phosphatase 4, regulatory subunit 4                                  | 9.08e-01            | 7.42e-03 |
| ENSMUST00000172478 | ENSMUSG00000074369 | Obox2         | oocyte specific homeobox 2                                                   | 8.92e-01            | 1.01e-02 |
| ENSMUST00000174076 | ENSMUSG00000074369 | Obox2         | oocyte specific homeobox 2                                                   | 8.92e-01            | 1.01e-02 |
| ENSMUST00000174305 | ENSMUSG00000074369 | Obox2         | oocyte specific homeobox 2                                                   | 8.92e-01            | 1.01e-02 |
| ENSMUST00000149336 | ENSMUSG00000029651 | Mtus2         | microtubule associated tumor suppressor candidate 2                          | 8.84e-01            | 5.44e-03 |
| ENSMUST00000194041 | ENSMUSG00000026587 | Astn1         | astrotactin 1                                                                | 8.62e-01            | 1.16e-04 |
| ENSMUST00000213557 | ENSMUSG00000071317 | Bves          | blood vessel epicardial substance                                            | 8.61e-01            | 1.04e-02 |
| ENSMUST00000015576 | ENSMUSG00000022226 | Mcpt2         | mast cell protease 2                                                         | 8.59e-01            | 7.10e-04 |
| ENSMUST00000207685 | ENSMUSG00000035177 | Nlrp2         | NLR family, pyrin domain containing 2                                        | 8.50e-01            | 6.82e-04 |
| ENSMUST00000204277 | ENSMUSG00000039347 | Atp6v0e2      | ATPase, H+ transporting, lysosomal V0 subunit E2                             | 8.50e-01            | 3.72e-03 |
| ENSMUST00000201736 | ENSMUSG00000094719 | Gm5108        | predicted gene 5108                                                          | 8.48e-01            | 1.46e-03 |
| ENSMUST00000135355 | ENSMUSG00000021645 | Snn1          | survival motor neuron 1                                                      | 8.46e-01            | 4.36e-02 |
| ENSMUST00000142251 | ENSMUSG00000051747 | Ttn           | titin                                                                        | 8.43e-01            | 8.03e-02 |
| ENSMUST00000195849 | ENSMUSG00000034837 | Gnat1         | guanine nucleotide binding protein, alpha transducing 1                      | 8.41e-01            | 2.01e-02 |
| ENSMUST00000202984 | ENSMUSG00000006641 | Slc5a6        | solute carrier family 5 (sodium-dependent vitamin transporter), member 6     | 8.29e-01            | 1.50e-02 |
| ENSMUST00000022836 | ENSMUSG00000022227 | Mcpt1         | mast cell protease 1                                                         | 8.28e-01            | 1.36e-02 |
| ENSMUST00000176196 | ENSMUSG00000032595 | Cdhr4         | cadherin-related family member 4                                             | 8.25e-01            | 1.70e-02 |
| ENSMUST00000177093 | ENSMUSG00000032595 | Cdhr4         | cadherin-related family member 4                                             | 8.25e-01            | 1.70e-02 |
| ENSMUST00000141085 | ENSMUSG00000041216 | Clvs1         | clavesin 1                                                                   | 8.23e-01            | 3.49e-02 |
| ENSMUST00000095450 | ENSMUSG00000071178 | Serpina1b     | serine (or cysteine) peptidase inhibitor, clade A, member 1B                 | 8.20e-01            | 2.66e-02 |
| ENSMUST00000164454 | ENSMUSG00000071178 | Serpina1b     | serine (or cysteine) peptidase inhibitor, clade A, member 1B                 | 8.20e-01            | 2.66e-02 |
| ENSMUST00000186166 | ENSMUSG00000071178 | Serpina1b     | serine (or cysteine) peptidase inhibitor, clade A, member 1B                 | 8.20e-01            | 2.66e-02 |
| ENSMUST00000195095 | ENSMUSG00000104098 | AA619741      | expressed sequence AA619741                                                  | 8.18e-01            | 3.66e-02 |
| ENSMUST00000168044 | ENSMUSG00000043557 | Mdga1         | MAM domain containing glycosylphosphatidylinositol anchor 1                  | 8.15e-01            | 2.99e-04 |
| ENSMUST00000189541 | ENSMUSG00000016918 | Sulf1         | sulfatase 1                                                                  | 8.13e-01            | 1.79e-02 |
| ENSMUST00000172308 | ENSMUSG00000072731 | Gm3715        | predicted gene 3715                                                          | 8.08e-01            | 3.60e-03 |
| ENSMUST00000190082 | ENSMUSG00000026246 | Alpp12        | alkaline phosphatase, placental-like 2                                       | 8.08e-01            | 1.82e-02 |
| ENSMUST00000148715 | ENSMUSG00000009246 | Trpm5         | transient receptor potential cation channel, subfamily M, member 5           | 8.06e-01            | 4.03e-02 |
| ENSMUST00000191403 | ENSMUSG00000099826 | Scgb2b10      | secretoglobin, family 2B, member 10                                          | 8.04e-01            | 1.00e-01 |
| ENSMUST00000103323 | ENSMUSG00000076522 | Igkv16-104    | immunoglobulin kappa variable 16-104                                         | 8.00e-01            | 1.14e-01 |



## Supplementary Table S7

Ct values of genes analyzed in the proximal colonic epithelium of the indicated mice 7 days after tamoxifen administration; the values were normalized to  $\beta$ -actin gene expression; SD, standard deviation.

| gene name | Control   |      | <i>Apc</i> <sup>KO/KO</sup> <i>Msx1</i> <sup>+/+</sup> |      | <i>Apc</i> <sup>KO/KO</sup> <i>Msx1</i> <sup>KO/KO</sup> |      |
|-----------|-----------|------|--------------------------------------------------------|------|----------------------------------------------------------|------|
|           | Ct values | SD   | Ct values                                              | SD   | Ct values                                                | SD   |
| Bves      | 37.99     | 3.99 | 40.51                                                  | 1.40 | 40.44                                                    | 2.59 |
| Mdga1     | 31.68     | 1.22 | 33.49                                                  | 0.55 | 32.96                                                    | 0.91 |
| Mtus2     | 32.68     | 1.15 | 35.65                                                  | 0.84 | 35.19                                                    | 0.23 |
| Mylk3     | 37.07     | 1.51 | 39.09                                                  | 0.69 | 38.71                                                    | 1.37 |
| Msx1      | 36.40     | 1.51 | 26.64                                                  | 0.50 | 30.14                                                    | 0.86 |
| Msx2      | 36.94     | 1.06 | 27.23                                                  | 0.62 | 26.55                                                    | 0.33 |
| Slc5a6    | 26.08     | 1.11 | 28.40                                                  | 0.31 | 26.72                                                    | 1.07 |
| Stk32b    | 34.16     | 0.87 | 34.69                                                  | 0.41 | 27.41                                                    | 0.49 |
| Trpm      | 39.73     | 3.53 | 44.12                                                  | 3.19 | 42.30                                                    | 2.30 |
| Ttn       | 40.55     | 1.27 | 40.29                                                  | 0.61 | 40.81                                                    | 2.14 |
| Ubb       | 18.27     | 0.94 | 19.63                                                  | 0.34 | 19.30                                                    | 0.29 |

## Supplementary Table S8

Differentially expressed genes ( $\log_{2}FC \geq 1$ ;  $q\text{-value} < 0.05$ ) in SW620 cells with the disrupted *MSX1* gene compared to SW620 cells with intact *MSX1*. Genes that were identified in Watanabe et al. (ref. No. 24) are in red.

| ENTREZ | SYMBOL               | GENENAME                                                                       | logFC | p-value    |
|--------|----------------------|--------------------------------------------------------------------------------|-------|------------|
|        | 25984 KRT23          | keratin 23, type I                                                             | 4.99  | 3.4e-08    |
|        | 3860 KRT13           | keratin 13, type I                                                             | 4.12  | 3.6e-05    |
|        | 11009 IL24           | interleukin 24                                                                 | 3.65  | 9.7e-07    |
|        | 430 ASCL2            | achaete-scute family bHLH transcription factor 2                               | 3.51  | 7.6e-07    |
|        | 2706 GJB2            | gap junction protein, beta 2, 26kDa                                            | 3.27  | 4.4e-07    |
|        | 79083 MLPH           | melanophilin                                                                   | 3.11  | 3.2e-05    |
|        | 9289 ADGRG1          | adhesion G protein-coupled receptor G1                                         | 3.05  | 2.3e-07    |
|        | 54923 LIME1          | Lck interacting transmembrane adaptor 1                                        | 3.01  | 0.0000050  |
|        | 54843 SYTL2          | synaptotagmin-like 2                                                           | 2.99  | 0.0000300  |
|        | 1473 CST5            | cystatin D                                                                     | 2.93  | 5.1e-05    |
|        | 4923 NTSR1           | neurotensin receptor 1 (high affinity)                                         | 2.87  | 0.00015    |
|        | 56937 PMEPA1         | prostate transmembrane protein, androgen induced 1                             | 2.80  | 3.8e-05    |
|        | 80206 FHOD3          | formin homology 2 domain containing 3                                          | 2.77  | 6.8e-06    |
|        | 9289 ADGRG1          | adhesion G protein-coupled receptor G1                                         | 2.71  | 3.7e-06    |
|        | 4843 NOS2            | nitric oxide synthase 2, inducible                                             | 2.65  | 2.2e-08    |
|        | 56937 PMEPA1         | prostate transmembrane protein, androgen induced 1                             | 2.60  | 2.9e-05    |
|        | 4071 TM4SF1          | transmembrane 4 L six family member 1                                          | 2.44  | 7.1e-05    |
|        | 124056 NOXO1         | NADPH oxidase organizer 1                                                      | 2.44  | 3.9e-05    |
|        | 10974 ADIRF          | adipogenesis regulatory factor                                                 | 2.37  | 1.6e-05    |
|        | 400221 FLJ22447      | uncharacterized LOC400221                                                      | 2.30  | 3.2e-06    |
|        | 124056 NOXO1         | NADPH oxidase organizer 1                                                      | 2.16  | 1.7e-06    |
|        | 2043 EPHA4           | EPH receptor A4                                                                | 2.15  | 3.6e-05    |
|        | 374946 DRAXIN        | dorsal inhibitory axon guidance protein                                        | 2.12  | 5.6e-07    |
|        | 114794 ELFN2         | extracellular leucine-rich repeat and fibronectin type III domain containing 2 | 2.04  | 2.4e-05    |
|        | 83715 ESPN           | espin                                                                          | 2.00  | 1.5e-05    |
|        | 8771 TNFRSF6B        | tumor necrosis factor receptor superfamily, member 6b, decoy                   | 1.94  | 0.00034    |
|        | 54843 SYTL2          | synaptotagmin-like 2                                                           | 1.94  | 0.00018    |
|        | 894 CCND2            | cyclin D2                                                                      | 1.92  | 0.00011    |
|        | 257313 UTS2B         | urotensin 2B                                                                   | 1.91  | 5.4e-05    |
|        | 56648 EIF5A2         | eukaryotic translation initiation factor 5A2                                   | 1.87  | 9.3e-06    |
|        | 4843 NOS2            | nitric oxide synthase 2, inducible                                             | 1.86  | 7.1e-08    |
|        | 894 CCND2            | cyclin D2                                                                      | 1.86  | 9.9e-05    |
|        | 926 CD8B             | CD8b molecule                                                                  | 1.85  | 5.9e-05    |
|        | 547 KIF1A            | kinesin family member 1A                                                       | 1.83  | 7.3e-07    |
|        | 926 CD8B             | CD8b molecule                                                                  | 1.83  | 0.00003000 |
|        | 10265 IRX5           | iroquois homeobox 5                                                            | 1.80  | 1.7e-07    |
|        | 11009 IL24           | interleukin 24                                                                 | 1.72  | 1.5e-05    |
|        | 283869 NPW           | neuropeptide W                                                                 | 1.71  | 7.3e-05    |
|        | 79865 TREML2         | triggering receptor expressed on myeloid cells-like 2                          | 1.69  | 1.1e-05    |
|        | 100288413 ERVMER34-1 | endogenous retrovirus group MER34, member 1                                    | 1.68  | 0.00041    |
|        | 94234 FOXQ1          | forkhead box Q1                                                                | 1.68  | 1.8e-06    |
|        | 1045 CDX2            | caudal type homeobox 2                                                         | 1.67  | 8.4e-05    |
|        | 11151 CORO1A         | coronin, actin binding protein, 1A                                             | 1.65  | 8.5e-06    |
|        | 375607 NAT16         | N-acetyltransferase 16 (GCN5-related, putative)                                | 1.64  | 1.2e-06    |
|        | 124056 NOXO1         | NADPH oxidase organizer 1                                                      | 1.63  | 1.1e-05    |
|        | 440925 LINC01124     | long intergenic non-protein coding RNA 1124                                    | 1.63  | 4.3e-07    |
|        | 147 ADRA1B           | adrenoceptor alpha 1B                                                          | 1.63  | 0.00040000 |
|        | 201305 SPNS3         | spinster homolog 3 (Drosophila)                                                | 1.61  | 0.00001000 |
|        | 8470 SORBS2          | sorbin and SH3 domain containing 2                                             | 1.61  | 0.00030000 |
|        | 10265 IRX5           | iroquois homeobox 5                                                            | 1.61  | 6.6e-05    |
|        | 130576 LYPD6B        | LY6/PLAUR domain containing 6B                                                 | 1.60  | 3.5e-07    |
|        | 3651 PDX1            | pancreatic and duodenal homeobox 1                                             | 1.59  | 2.7e-05    |
|        | 1525 CXADR           | coxsackie virus and adenovirus receptor                                        | 1.57  | 4.5e-07    |
|        | 91614 DEPDC7         | DEP domain containing 7                                                        | 1.57  | 7.7e-05    |
|        | 1366 CLDN7           | claudin 7                                                                      | 1.57  | 0.00043    |
|        | 5010 CLDN11          | claudin 11                                                                     | 1.57  | 5.3e-06    |
|        | 7739 ZNF185          | zinc finger protein 185 (LIM domain)                                           | 1.56  | 5.1e-05    |
|        | 56648 EIF5A2         | eukaryotic translation initiation factor 5A2                                   | 1.56  | 0.00055    |
|        | 83604 TMEM47         | transmembrane protein 47                                                       | 1.55  | 0.00056    |
|        | 7054 TH              | tyrosine hydroxylase                                                           | 1.55  | 0.00064    |
|        | 8470 SORBS2          | sorbin and SH3 domain containing 2                                             | 1.55  | 3.6e-05    |
|        | 2295 FOXF2           | forkhead box F2                                                                | 1.54  | 3.2e-06    |
|        | 11033 ADAP1          | ArfGAP with dual PH domains 1                                                  | 1.52  | 0.00014    |
|        | 50486 G0S2           | G0/G1 switch 2                                                                 | 1.51  | 6.9e-05    |
|        | 93273 LEMD1          | LEM domain containing 1                                                        | 1.50  | 0.00033    |
|        | 145447 ABHD12B       | abhydrolase domain containing 12B                                              | 1.50  | 9.6e-05    |
|        | 2051 EPHB6           | EPH receptor B6                                                                | 1.49  | 1.1e-06    |
|        | 440900 LINC01191     | long intergenic non-protein coding RNA 1191                                    | 1.48  | 0.00013    |
|        | 91614 DEPDC7         | DEP domain containing 7                                                        | 1.47  | 0.00040000 |
|        | 440603 BCL2L15       | BCL2-like 15                                                                   | 1.47  | 0.00036    |
|        | 127534 GJB4          | gap junction protein, beta 4, 30.3kDa                                          | 1.46  | 0.00018    |
|        | 5753 PTK6            | protein tyrosine kinase 6                                                      | 1.45  | 4.4e-06    |
|        | 100133190 ADIRF-AS1  | ADIRF antisense RNA 1                                                          | 1.45  | 1.2e-06    |
|        | 11009 IL24           | interleukin 24                                                                 | 1.44  | 0.00041    |
|        | 26281 FGF20          | fibroblast growth factor 20                                                    | 1.43  | 0.00014    |
|        | 11033 ADAP1          | ArfGAP with dual PH domains 1                                                  | 1.43  | 4.5e-05    |
|        | 115701 ALPK2         | alpha-kinase 2                                                                 | 1.43  | 0.00029    |
|        | 55504 TNFRSF19       | tumor necrosis factor receptor superfamily, member 19                          | 1.41  | 3.2e-05    |
|        | 28514 DLL1           | delta-like 1 (Drosophila)                                                      | 1.41  | 9.6e-05    |
|        | 145447 ABHD12B       | abhydrolase domain containing 12B                                              | 1.39  | 8.9e-05    |
|        | 8718 TNFRSF25        | tumor necrosis factor receptor superfamily, member 25                          | 1.38  | 9.8e-06    |
|        | 9022 CLIC3           | chloride intracellular channel 3                                               | 1.38  | 6.2e-06    |
|        | 90271 OLMALINC       | oligodendrocyte maturation-associated long intergenic non-coding RNA           | 1.35  | 3.9e-06    |
|        | 2274 FHL2            | four and a half LIM domains 2                                                  | 1.34  | 0.00029    |
|        | 26232 FBXO2          | F-box protein 2                                                                | 1.33  | 0.00000010 |

|        |          |                                                                      |       |            |
|--------|----------|----------------------------------------------------------------------|-------|------------|
| 440603 | BCL2L15  | BCL2-like 15                                                         | 1.32  | 0.00036    |
| 9048   | ARTN     | artemin                                                              | 1.31  | 1.7e-05    |
| 2870   | GRK6     | G protein-coupled receptor kinase 6                                  | 1.29  | 1.7e-05    |
| 79006  | METRN    | meteorin, glial cell differentiation regulator                       | 1.28  | 1.2e-05    |
| 4939   | OAS2     | 2'-5'-oligoadenylate synthetase 2, 69/71kDa                          | 1.27  | 0.00017    |
| 10870  | HCSST    | hematopoietic cell signal transducer                                 | 1.27  | 0.00044    |
| 2852   | GPER1    | G protein-coupled estrogen receptor 1                                | 1.27  | 1.3e-06    |
| 353322 | ANKRD37  | ankyrin repeat domain 37                                             | 1.27  | 1.7e-05    |
| 9096   | TBX18    | T-box 18                                                             | 1.26  | 8.7e-06    |
| 84634  | KISS1R   | KISS1 receptor                                                       | 1.26  | 0.00040000 |
| 26281  | FGF20    | fibroblast growth factor 20                                          | 1.26  | 0.00028    |
| 9590   | AKAP12   | A kinase (PRKA) anchor protein 12                                    | 1.26  | 0.00013    |
| 23504  | RIMBP2   | RIMS binding protein 2                                               | 1.25  | 0.00013    |
| 389058 | SP5      | Sp5 transcription factor                                             | 1.24  | 4.1e-06    |
| 23616  | SH3BP1   | SH3-domain binding protein 1                                         | 1.24  | 0.00012    |
| 283748 | PLA2G4D  | phospholipase A2, group IVD (cytosolic)                              | 1.24  | 0.00024    |
| 137075 | CLDN23   | claudin 23                                                           | 1.24  | 0.00051    |
| 9590   | AKAP12   | A kinase (PRKA) anchor protein 12                                    | 1.24  | 0.00035    |
| 55057  | AIM1L    | absent in melanoma 1-like                                            | 1.23  | 0.00024    |
| 1299   | COL9A3   | collagen, type IX, alpha 3                                           | 1.22  | 0.00018    |
| 8728   | ADAM19   | ADAM metallopeptidase domain 19                                      | 1.22  | 0.00002000 |
| 2707   | GJB3     | gap junction protein, beta 3, 31kDa                                  | 1.21  | 0.00022    |
| 2274   | FHL2     | four and a half LIM domains 2                                        | 1.21  | 0.00033    |
| 7474   | WNT5A    | wingless-type MMTV integration site family, member 5A                | 1.20  | 5.3e-05    |
| 54436  | SH3TC1   | SH3 domain and tetratricopeptide repeats 1                           | 1.20  | 0.00023    |
| 137994 | LETM2    | leucine zipper-EF-hand containing transmembrane protein 2            | 1.20  | 2.7e-06    |
| 377841 | ENTPD8   | ectonucleoside triphosphate diphosphohydrolase 8                     | 1.19  | 0.00062    |
| 90271  | OLMALINC | oligodendrocyte maturation-associated long intergenic non-coding RNA | 1.19  | 3.4e-05    |
| 285489 | DOK7     | docking protein 7                                                    | 1.18  | 3.1e-05    |
| 65997  | RASL11B  | RAS-like, family 11, member B                                        | 1.17  | 1.5e-05    |
| 2870   | GRK6     | G protein-coupled receptor kinase 6                                  | 1.17  | 0.00034    |
| 1820   | ARID3A   | AT rich interactive domain 3A (BRIGHT-like)                          | 1.17  | 0.00023    |
| 2852   | GPER1    | G protein-coupled estrogen receptor 1                                | 1.16  | 1.8e-05    |
| 5352   | PLOD2    | procollagen-lysine, 2-oxoglutarate 5-dioxygenase 2                   | 1.15  | 0.00011    |
| 4828   | NMB      | neuromedin B                                                         | 1.15  | 1.8e-05    |
| 64757  | MARCB1   | mitochondrial amidoxime reducing component 1                         | 1.15  | 8.1e-05    |
| 130576 | LYPD6B   | LY6/PLAUR domain containing 6B                                       | 1.15  | 5.7e-05    |
| 7262   | PHLDA2   | pleckstrin homology-like domain, family A, member 2                  | 1.14  | 9.2e-05    |
| 29903  | CCDC106  | coiled-coil domain containing 106                                    | 1.14  | 1.9e-05    |
| 2571   | GAD1     | glutamate decarboxylase 1 (brain, 67kDa)                             | 1.13  | 2.7e-06    |
| 3638   | INSIG1   | insulin induced gene 1                                               | 1.12  | 0.00038    |
| 5002   | SLC22A18 | solute carrier family 22, member 18                                  | 1.11  | 0.00045    |
| 59307  | SIGIRR   | single immunoglobulin and toll-interleukin 1 receptor (TIR) domain   | 1.11  | 0.00041    |
| 3714   | JAG2     | jagged 2                                                             | 1.10  | 0.00035    |
| 146330 | FBXL16   | F-box and leucine-rich repeat protein 16                             | 1.10  | 0.00032    |
| 2161   | F12      | coagulation factor XII (Hageman factor)                              | 1.09  | 0.00039    |
| 860    | RUNX2    | runt-related transcription factor 2                                  | 1.08  | 0.00016    |
| 55083  | KIF26B   | kinesin family member 26B                                            | 1.08  | 1.5e-05    |
| 3422   | ID1I     | isopentenyl-diphosphate delta isomerase 1                            | 1.08  | 0.00011    |
| 340706 | VWA2     | von Willebrand factor A domain containing 2                          | 1.07  | 0.00024    |
| 59307  | SIGIRR   | single immunoglobulin and toll-interleukin 1 receptor (TIR) domain   | 1.07  | 7.5e-05    |
| 3669   | ISG20    | interferon stimulated exonuclease gene 20kDa                         | 1.07  | 0.00038    |
| 2571   | GAD1     | glutamate decarboxylase 1 (brain, 67kDa)                             | 1.07  | 1.4e-06    |
| 2571   | GAD1     | glutamate decarboxylase 1 (brain, 67kDa)                             | 1.07  | 4.6e-05    |
| 1525   | CXADR    | coxsackie virus and adenovirus receptor                              | 1.06  | 6.9e-06    |
| 50650  | ARHGEF3  | Rho guanine nucleotide exchange factor (GEF) 3                       | 1.06  | 2.1e-06    |
| 9260   | PDLIM7   | PDZ and LIM domain 7 (enigma)                                        | 1.05  | 0.00053    |
| 4752   | NEK3     | NIMA-related kinase 3                                                | 1.05  | 1.1e-05    |
| 27040  | LAT      | linker for activation of T cells                                     | 1.05  | 0.00013    |
| 10331  | B3GNT3   | UDP-GlcNAc:betaGal beta-1,3-N-acetylglucosaminyltransferase 3        | 1.05  | 0.00052    |
| 55074  | OXR1     | oxidation resistance 1                                               | 1.04  | 1.7e-05    |
| 140862 | ISM1     | isthmin 1, angiogenesis inhibitor                                    | 1.04  | 0.00013    |
| 432    | ASGR1    | asialoglycoprotein receptor 1                                        | 1.04  | 1.9e-05    |
| 8739   | HRK      | harakiri, BCL2 interacting protein                                   | 1.03  | 0.00009000 |
| 727957 | MROH1    | maestro heat-like repeat family member 1                             | 1.03  | 8.6e-05    |
| 1627   | DBN1     | drebrin 1                                                            | 1.03  | 0.00011    |
| 1294   | COL7A1   | collagen, type VII, alpha 1                                          | 1.03  | 0.00010000 |
| 619279 | ZNF704   | zinc finger protein 704                                              | 1.02  | 0.00032    |
| 3714   | JAG2     | jagged 2                                                             | 1.02  | 3.9e-06    |
| 619279 | ZNF704   | zinc finger protein 704                                              | 1.02  | 0.00040000 |
| 11340  | EXOSC8   | exosome component 8                                                  | 1.02  | 7.1e-05    |
| 27295  | PDLIM3   | PDZ and LIM domain 3                                                 | 1.01  | 1.5e-05    |
| 445    | ASS1     | argininosuccinate synthase 1                                         | 1.01  | 8.9e-05    |
| 338440 | ANO9     | anoctamin 9                                                          | 1.01  | 0.00030000 |
| 79056  | PRRG4    | proline rich Gla (G-carboxyglutamic acid) 4 (transmembrane)          | 1.00  | 0.00021    |
| 55057  | AIM1L    | absent in melanoma 1-like                                            | 1.00  | 8.9e-05    |
| 170680 | PSORS1C2 | psoriasis susceptibility 1 candidate 2                               | -1.00 | 0.00024    |
| 4139   | MARK1    | MAP/microtubule affinity-regulating kinase 1                         | -1.00 | 0.00021    |
| 7728   | ZNF175   | zinc finger protein 175                                              | -1.01 | 0.00005000 |
| 1540   | CYLD     | cylindromatosis (turban tumor syndrome)                              | -1.01 | 5.8e-05    |
| 55321  | TMEM74B  | transmembrane protein 74B                                            | -1.01 | 0.00044    |
| 84775  | ZNF607   | zinc finger protein 607                                              | -1.02 | 0.00054    |
| 7105   | TSPAN6   | tetraspanin 6                                                        | -1.02 | 0.00007000 |
| 8320   | EOMES    | eomesodermin                                                         | -1.02 | 0.00061    |
| 80727  | TTYH3    | tweety family member 3                                               | -1.03 | 8.5e-05    |
| 64759  | TNS3     | tensin 3                                                             | -1.03 | 4.5e-05    |
| 1021   | CDK6     | cyclin-dependent kinase 6                                            | -1.03 | 7.9e-06    |
| 6777   | STAT5B   | signal transducer and activator of transcription 5B                  | -1.04 | 0.00024    |
| 7105   | TSPAN6   | tetraspanin 6                                                        | -1.05 | 0.00013    |
| 1522   | CTSZ     | cathepsin Z                                                          | -1.05 | 0.00039    |
| 53947  | A4GALT   | alpha 1,4-galactosyltransferase                                      | -1.06 | 0.00041    |

|        |           |                                                                                    |       |            |
|--------|-----------|------------------------------------------------------------------------------------|-------|------------|
| 6482   | ST3GAL1   | ST3 beta-galactoside alpha-2,3-sialyltransferase 1                                 | -1.08 | 1.5e-05    |
| 3675   | ITGA3     | integrin, alpha 3 (antigen CD49C, alpha 3 subunit of VLA-3 receptor)               | -1.08 | 0.00057    |
| 91608  | RASL10B   | RAS-like, family 10, member B                                                      | -1.10 | 0.00020000 |
| 55890  | GPRC5C    | G protein-coupled receptor, class C, group 5, member C                             | -1.10 | 0.00055    |
| 725    | C4BPB     | complement component 4 binding protein, beta                                       | -1.10 | 0.00054    |
| 54809  | SAMD9     | sterile alpha motif domain containing 9                                            | -1.11 | 0.00027    |
| 51438  | MAGEC2    | melanoma antigen family C2                                                         | -1.11 | 0.00090000 |
| 91461  | PKDCC     | protein kinase domain containing, cytoplasmic                                      | -1.11 | 4.3e-05    |
| 55616  | ASAP3     | ArfGAP with SH3 domain, ankyrin repeat and PH domain 3                             | -1.11 | 0.00042    |
| 124912 | SPACA3    | sperm acrosome associated 3                                                        | -1.12 | 3.4e-05    |
| 8651   | SOCS1     | suppressor of cytokine signaling 1                                                 | -1.12 | 6.9e-06    |
| 1031   | CDKN2C    | cyclin-dependent kinase inhibitor 2C (p18, inhibits CDK4)                          | -1.13 | 9.8e-06    |
| 114038 | LINC00313 | long intergenic non-protein coding RNA 313                                         | -1.13 | 6.1e-05    |
| 146850 | PIK3R6    | phosphoinositide-3-kinase, regulatory subunit 6                                    | -1.14 | 0.00063    |
| 857    | CAV1      | caveolin 1, caveolae protein, 22kDa                                                | -1.15 | 9.8e-05    |
| 9715   | FAM131B   | family with sequence similarity 131, member B                                      | -1.16 | 9.8e-05    |
| 79822  | ARHGAP28  | Rho GTPase activating protein 28                                                   | -1.16 | 1.3e-05    |
| 8506   | CNTNAP1   | contactin associated protein 1                                                     | -1.17 | 4.6e-05    |
| 6653   | SORL1     | sortilin-related receptor, L(DLR class) A repeats containing                       | -1.19 | 4.4e-05    |
| 2159   | F10       | coagulation factor X                                                               | -1.20 | 0.00012    |
| 317649 | EIF4E3    | eukaryotic translation initiation factor 4E family member 3                        | -1.20 | 0.00020000 |
| 745    | MYRF      | myelin regulatory factor                                                           | -1.20 | 0.00055    |
| 10628  | TXNIP     | thioredoxin interacting protein                                                    | -1.21 | 0.00016    |
| 51438  | MAGEC2    | melanoma antigen family C2                                                         | -1.21 | 1.4e-05    |
| 3708   | ITPR1     | inositol 1,4,5-trisphosphate receptor, type 1                                      | -1.21 | 8.5e-05    |
| 9056   | SLC7A7    | solute carrier family 7 (amino acid transporter light chain, y+L system), member 7 | -1.22 | 0.00024    |
| 9638   | FEZ1      | fasciculation and elongation protein zeta 1 (zygin I)                              | -1.23 | 0.00048    |
| 716    | C1S       | complement component 1, s subcomponent                                             | -1.23 | 0.00039    |
| 6653   | SORL1     | sortilin-related receptor, L(DLR class) A repeats containing                       | -1.24 | 0.00061    |
| 943    | TNFRSF8   | tumor necrosis factor receptor superfamily, member 8                               | -1.25 | 3.7e-06    |
| 22920  | KIFAP3    | kinesin-associated protein 3                                                       | -1.25 | 4.9e-05    |
| 55890  | GPRC5C    | G protein-coupled receptor, class C, group 5, member C                             | -1.28 | 0.00034    |
| 57493  | HEG1      | heart development protein with EGF-like domains 1                                  | -1.30 | 0.00059    |
| 8857   | FCGBP     | Fe fragment of IgG binding protein                                                 | -1.30 | 0.00058    |
| 104    | ADARB1    | adenosine deaminase, RNA-specific, B1                                              | -1.31 | 0.00003000 |
| 23228  | PLCL2     | phospholipase C-like 2                                                             | -1.35 | 0.00033    |
| 2192   | FBLN1     | fibulin 1                                                                          | -1.35 | 0.00025    |
| 104    | ADARB1    | adenosine deaminase, RNA-specific, B1                                              | -1.40 | 2.4e-06    |
| 104    | ADARB1    | adenosine deaminase, RNA-specific, B1                                              | -1.41 | 1.2e-05    |
| 6578   | SLCO2A1   | solute carrier organic anion transporter family, member 2A1                        | -1.42 | 4.1e-05    |
| 3689   | ITGB2     | integrin, beta 2 (complement component 3 receptor 3 and 4 subunit)                 | -1.42 | 0.00049    |
| 4613   | MYCN      | v-myc avian myelocytomatosis viral oncogene neuroblastoma derived homolog          | -1.44 | 0.00016    |
| 57574  | MARCH4    | membrane-associated ring finger (C3HC4) 4, E3 ubiquitin protein ligase             | -1.46 | 0.00021    |
| 54549  | SDK2      | sidekick cell adhesion molecule 2                                                  | -1.47 | 0.00043    |
| 79694  | MANEA     | mannosidase, endo-alpha                                                            | -1.53 | 0.00062    |
| 3814   | KISS1     | KiSS-1 metastasis-suppressor                                                       | -1.59 | 0.00006000 |
| 25894  | PLEKHG4   | pleckstrin homology domain containing, family G (with RhoGef domain) member 4      | -1.61 | 0.00053    |
| 7032   | TFF2      | trefoil factor 2                                                                   | -1.62 | 0.00027    |
| 4137   | MAPT      | microtubule-associated protein tau                                                 | -1.63 | 3.1e-05    |
| 55244  | SLC47A1   | solute carrier family 47 (multidrug and toxin extrusion), member 1                 | -1.66 | 9.2e-05    |
| 5159   | PDGFRB    | platelet-derived growth factor receptor, beta polypeptide                          | -1.66 | 2.6e-05    |
| 343990 | KIAA1211L | KIAA1211-like                                                                      | -1.66 | 2.7e-06    |
| 30846  | EHD2      | EH-domain containing 2                                                             | -1.66 | 3.4e-05    |
| 343990 | KIAA1211L | KIAA1211-like                                                                      | -1.68 | 2.7e-07    |
| 2192   | FBLN1     | fibulin 1                                                                          | -1.74 | 0.00016    |
| 162494 | RHBDL3    | rhomboid, veinlet-like 3 (Drosophila)                                              | -1.76 | 5.2e-05    |
| 146850 | PIK3R6    | phosphoinositide-3-kinase, regulatory subunit 6                                    | -1.85 | 0.00022    |
| 641700 | ECSCR     | endothelial cell surface expressed chemotaxis and apoptosis regulator              | -1.86 | 0.00050000 |
| 3689   | ITGB2     | integrin, beta 2 (complement component 3 receptor 3 and 4 subunit)                 | -1.89 | 9.6e-05    |
| 6448   | SGSH      | N-sulfoglucosamine sulfohydrolase                                                  | -1.93 | 4.7e-06    |
| 5654   | HTRA1     | HtrA serine peptidase 1                                                            | -1.93 | 0.00019    |
| 5138   | PDE2A     | phosphodiesterase 2A, cGMP-stimulated                                              | -2.09 | 0.00056    |
| 3851   | KRT4      | keratin 4, type II                                                                 | -2.15 | 0.00043    |
| 946    | SIGLEC6   | sialic acid binding Ig-like lectin 6                                               | -2.37 | 1.3e-06    |
| 6280   | S100A9    | S100 calcium binding protein A9                                                    | -2.40 | 0.00038    |
| 2018   | EMX2      | empty spiracles homeobox 2                                                         | -2.58 | 0.00049    |
| 2018   | EMX2      | empty spiracles homeobox 2                                                         | -2.76 | 0.00016    |
| 1277   | COL1A1    | collagen, type I, alpha 1                                                          | -2.87 | 0.00019    |
| 24141  | LAMP5     | lysosomal-associated membrane protein family, member 5                             | -2.90 | 2.1e-07    |

## Supplementary Table S9

Colorectal neoplasia specimens summary  
HYP, hyperplasia; LGD, low-grade dysplasia;  
HGD, high-grade dysplasia, CRC, carcinoma

|     | <b>Age</b><br>(median, min.-max.) | <b>Gender</b><br>(M/F) |
|-----|-----------------------------------|------------------------|
| HYP | 69 (59-77)                        | 6/3                    |
| LGD | 67 (53-89)                        | 12/15                  |
| HGD | 64 (36-85)                        | 15/9                   |
| CRC | 82 (63-90)                        | 6/6                    |

## Supplementary Table S10

### List of primers used for qRT-PCR

| Gene                           | Organism          | Forward primer sequence (5' to 3') | Reverse primer sequence (5' to 3') |
|--------------------------------|-------------------|------------------------------------|------------------------------------|
| <i>β-actin</i>                 | Mouse             | GATCTGGCACCACACCTTCT               | GGGGTGTGAAGGTCTCAAA                |
| <i>β-actin</i>                 | Human             | GGCATCCTCACCTGAAGTA                | AGGTGTGGTGCCAGATTTTC               |
| <i>ABHD12B</i>                 | Human             | CGGAAGAAAAATTGCTGCTC               | TCACCCAGGTTCAACTCTC                |
| <i>Ascl2</i>                   | Mouse             | AAGCACACCTTGACTGGTACG              | AAGTGGACGTTTGCACCTCA               |
| <i>ASCL2</i>                   | Human             | GCGAGCTACTCGACTTCTCC               | CTCGGCTTCCGGGGCTGAGG               |
| <i>Axin2</i>                   | Mouse             | TAGGCGGAATGAAGATGGAC               | CTGGTCACCCAACAAGGAGT               |
| <i>AXIN2</i>                   | Human             | TGAGGTCCACGGAACTGTTGACAGT          | CCCTCCCGCAATTGAGTGTGA              |
| <i>Bves</i>                    | Mouse             | GAACTGGCGAGAGATTCACC               | ATCATCACATCCAAGGCACA               |
| <i>CDX2</i>                    | Human             | TGCTGCAAACGCTCAACCCCGG             | CGGCTTTCCTCCGGATGGTGATG            |
| <i>Chromogranin A (CHGA)</i>   | Mouse             | GCGCCGGGCAAGTTTTTGCC               | GGGCTGGGTTTGGACAGCGAG              |
| <i>CTS2</i>                    | Human             | GCTTCTGCTGCTCGTGCT                 | GTTGACACCATCCACATTCG               |
| <i>CTNNB1 (β-catenin)</i>      | Human             | TTCCAGACACGCTATCATGC               | AATCCACTGGTGAACCAAGC               |
| <i>DEPDC7</i>                  | Human             | ACCTAAGAGGCAGTCCACCA               | GTCTGGTTGCTCAGGAAAGC               |
| <i>EGFP</i>                    | Aequorea victoria | GACGTAAACGGCCACAAAGTT              | GAACTCAGGCTCAGCTTGC                |
| <i>ENTPD8</i>                  | Human             | AGCGTCTAAGCAGACTTCC                | TCCACCAAGGAGGAAATGAG               |
| <i>GAPDH</i>                   | Mouse             | AACCTTGGCATTGTGGAAGG               | ATCCACAGTCTTCTGGGTGG               |
| <i>KRT23</i>                   | Human             | GCCTCCGAAGGACCTTAGAC               | AGATCTTCCCTGGGACCTGT               |
| <i>Lgr5</i>                    | Mouse             | CCTGTCCAGGCTTTCAGAAG               | CTGTGGAGTCCATCAAAGCA               |
| <i>Mdga1</i>                   | Mouse             | CCTCACACCCTACACCACCT               | GGGCCAGTATTAGGAGAGC                |
| <i>Msx1</i>                    | Mouse             | CTCTCGGCCATTTCTCAGTC               | TTGGTCTTGTGCTTGCGTAG               |
| <i>MSX1</i>                    | Human             | AGAAGATGCGCTCGTCAAAG               | GGCTTACGGTTCGTCTTGTG               |
| <i>Msx2</i>                    | Mouse             | AATTCGGAAGACGAGAC                  | CGGTTGGTCTTGTGTTTCT                |
| <i>MSX2</i>                    | Human             | CGGTCAAGTCGGAATAATCA               | GAGGAGCTGGGATGTGGTAA               |
| <i>Mtus2</i>                   | Mouse             | TCGTCTCTGGCTATTAC                  | CCCTTGGGTGTGTCCTTAGA               |
| <i>Mylk3</i>                   | Mouse             | CCCAGGAAGAACTGAAGCTG               | CGACCCCTCCTAAGACTTC                |
| <i>Nkd1</i>                    | Mouse             | AGGACGACTTCCCCTAGAA                | TGCAGCAAGCTGGTAATGTC               |
| <i>NKD1</i>                    | Human             | GCCTCCTGAGAAGACTGACG               | TTGCCGTTGTTGTCAAAGTC               |
| <i>RASL10B</i>                 | Human             | GGGGAGCCCCTACTTCTCTC               | ACCGTCAGGACCAACCATTG               |
| <i>RASL11B</i>                 | Human             | CCTGGCTCTTCAGGTTCAAG               | GTGGAGCTGGCTGATGAGTT               |
| <i>Slc5a6</i>                  | Mouse             | GCCCTAGGAATTGTCTGCAA               | GGCAAGGGAACACTGCATAG               |
| <i>SORBS2</i>                  | Human             | AATTCACATGGTGCACAAGC               | AGACCGATCTCTGGTCGAA                |
| <i>SP5</i>                     | Mouse             | GGACAGGAACTGGGTCGTA                | AATCGGGCTTAGCAAAAAC                |
| <i>SP5</i>                     | Human             | ACTTTGGCGAGTACCAGAGC               | ACGTCTTCCCGTACACCTTG               |
| <i>Stk32b</i>                  | Mouse             | GTGCAGAAGCGAGACACAAA               | CTGTAGGTGGTAGCGCAGGT               |
| <i>Sucrose Isomaltase (SI)</i> | Mouse             | TTCAAGAATCACACATTCAATTTACCTAG      | CTAAAACTTTCTTTGACATTTGAGCAA        |
| <i>TMEM47</i>                  | Human             | TGCCATCATTCTATTGCAT                | AACCCAGTTGAACTCATGG                |
| <i>TNFRSF19 (Troy)</i>         | Mouse             | GCTCAGGATGCTCAAAGGAC               | CCAGACACCAAGACTGCTCA               |
| <i>TNFRSF19 (TROY)</i>         | Human             | CTATGGGGAGGATGCACAGT               | TCTCCACAAGGCACACACTC               |
| <i>Trpm</i>                    | Mouse             | GGCACACAGAGTGGACTTGA               | AAGCCACGAAAATCTGATCG               |
| <i>Tm</i>                      | Mouse             | CCTGCCTCAGTGAAGAGAC                | TTCTGGCTCTGGTCCAGTT                |
| <i>Ubb</i>                     | Mouse             | ATGTGAAGGCCAAGATCCAG               | TAATAGCCACCCCTCAGACG               |
| <i>UBB</i>                     | Human             | GCTTTGTTGGGTGAGCTTGT               | TCACGAAGATCTGCATTTTGA              |

## Supplementary Table S10

List of primers used for cDNA amplification for subsequent cloning into pBluescript KS II vector (designed for ISH probes synthesis)

| Gene         | Organism | Forward primer sequence (5' to 3') | Reverse primer sequence (5' to 3') |
|--------------|----------|------------------------------------|------------------------------------|
| <i>Ascl2</i> | Mouse    | AGTGGATCCATGGAAGCACACCTTGACTG      | GAGGTCGACTCAGTAGCCCCCTAACCAAC      |

## Supplementary Table S10

### List of oligos used for lentiCRISPR and pARv-RFP cloning

| Gene        | Organism | Forward primer sequence (5' to 3') | Reverse primer sequence (5' to 3') | Recipient plasmid name     |
|-------------|----------|------------------------------------|------------------------------------|----------------------------|
| <i>APC</i>  | Human    | CACCGACTGCTGGAACTTCGCTCAC          | AAACGTGAGCGAAGTTCAGCAGTC           | lentiCRISPR                |
| <i>APC</i>  | Human    | CCTGTGAGCGAAGTTCAGCAGTGTCCGAT      | CGGACACTGCTGGAACTTCGCTCACAGG       | pARv-RFP for lentiCRISPR   |
| <i>MSX1</i> | Human    | CACCGAGGCGCTCATGGCCGACCAC          | AAACGTGGTCGGCCATGAGCGCCTC          | lentiCRISPR#1              |
| <i>MSX1</i> | Human    | CACCGCCACCGAGAAATGGCCGAG           | AAACCTCGGCCATTTCTCGGTGGGC          | lentiCRISPR#2              |
| <i>MSX1</i> | Human    | TGGAGGCGCTCATGGCCGACCACAGGCGAT     | CGCCTGTGGTCGGCCATGAGCGCCTCCA       | pARv-RFP for lentiCRISPR#1 |



## Supplementary Table S10

### List of primers used for amplification of CRISPR-targeted sites from genomic DNA

| Gene        | Organism | Primer sequence (5' to 3')         | name in figure |
|-------------|----------|------------------------------------|----------------|
| <i>MSX1</i> | Human    | CACTACAGGAAGCTAGCTTCTTCCCGCAAGG    | P1             |
| <i>MSX1</i> | Human    | GGCAAAGAAGTCATGTCAGCAGCCGGGGCC     | P2             |
| <i>MSX1</i> | Human    | GGCTGGCCAGTGCTGCGGCAGAAGGG         | P3             |
| <i>MSX1</i> | Human    | CACGCCATTGAAATCTGGCTGCTATTATGCCGAG | P4             |

### List of primers used for amplification of SP5 promoter element

| Gene       | Organism | Forward primer sequence (5' to 3')  | Reverse primer sequence (5' to 3') |
|------------|----------|-------------------------------------|------------------------------------|
| <i>SP5</i> | Human    | GCGGGTACCGCGAGGGTGCAGGGTGTGCAAGTAAA | GCACGGAGTACCAGGAGAGA               |

## Supplementary Table S10

### List of primers used for analysis of gene regulatory regions occupancy by MSX1

| Gene         | Organism | Forward primer sequence (5' to 3') | Reverse primer sequence (5' to 3') | Primers number in Figures |
|--------------|----------|------------------------------------|------------------------------------|---------------------------|
| <i>ASCL2</i> | Human    | CCTTGGTAAATACTTCACGTGC             | CAGTCAGAGTCTTCAACACTCC             | P1 and P2                 |
| <i>ASCL2</i> | Human    | GCCTGCTTTTGTATTGCCCA               | AGTTTCAGCCTCCCGAGTAG               | P3 and P4                 |
| <i>ASCL2</i> | Human    | GACGGCTCAGATAGTGTGGA               | CACCACCAACACCTCTCTCT               | P5 and P6                 |
| <i>SP5</i>   | Human    | CCCCCTTTGATCAGGAAAAT               | GCTTCAGGATCACCTCCAAG               |                           |
